# Supplementary material for: Pum2 and TDP-43 refine area-specific cytoarchitecture post-mitotically and modulate translation of Sox5, Bcl11b, and Rorb mRNAs in developing mouse neocortex
Source: eLife. 2022 Mar 9;11:e55199. doi: 10.7554/eLife.55199 (PMC8906809; doi:10.7554/eLife.55199)
Supplement: Source data 1. — Quantification of results from n = 3 mice of controls and Pum2 mutants in the prospective somatosensory cortex (pS) for Sox5, Bcl11b, Rorβ, and DAPI in single bins (Figure 1a) and total (Figure 1—figure supplement 5a) and Tbr1, Cux1 in single bins (Figure 1—figure supplement 6a). All markers are normalized to DAPI cells. Distribution of cells across six equal-sized bins is shown. For Bcl11b, only high-expressing neurons were counted. Data are shown as means ± standard error of the mean (SEM), n = 3 for each genotype. *p≤0.05, **p≤0.01, ***p≤0.001, two-tailed t-test. Pum2 cKO: Pum2fl/fl; Emx1Cre; II–IV, V, VI: layers II–IV, V, and VI. [file elife-55199-data1.xlsx]

## Sheet: Sox5
	ctrl1															cko1
		sa1					sa2					sa3					sa1					sa2					sa3
	Bins	Sox5	DAPI	Sox5/DAPI		Bins	Sox5	DAPI	Sox5/DAPI		Bins	Sox5	DAPI	Sox5/DAPI		Bins	Sox5	DAPI	Sox5/DAPI		Bins	Sox5	DAPI	Sox5/DAPI		Bins	Sox5	DAPI	Sox5/DAPI
	1	121	240	0.504167		1	139	247	0.562753		1	133	251	0.52988		1	141	223	0.632287		1	178	256	0.695312		1	173	261	0.662835
	2	145	190	0.763158		2	156	278	0.561151		2	143	271	0.527675		2	144	261	0.551724		2	180	228	0.789474		2	159	285	0.557895
	3	122	213	0.57277		3	142	247	0.574899		3	121	240	0.504167		3	137	218	0.62844		3	157	265	0.592453		3	157	278	0.564748
	4	13	192	0.0677083		4	40	261	0.153257		4	29	245	0.118367		4	115	213	0.539906		4	86	254	0.338583		4	84	291	0.28866
	5	6	207	0.0289855		5	6	249	0.0240964		5	6	240	0.025		5	24	216	0.111111		5	6	251	0.0239044		5	13	246	0.0528455
	6	8	95	0.0842105		6	8	109	0.0733945		6	12	135	0.0888889		6	29	126	0.230159		6	14	90	0.155556		6	20	105	0.190476
	Total	415	1137	0.364996		Total	491	1391	0.352983		Total	444	1382	0.321274		Total	590	1257	0.469372		Total	621	1344	0.462054		Total	606	1466	0.41337
	ctrl2															CKO2
		sa1					sa2					sa3					sa4					sa2					sa3
	Bins	Sox5	DAPI	Sox5/DAPI		Bins	Sox5	DAPI	Sox5/DAPI		Bins	Sox5	DAPI	Sox5/DAPI		Bins	Sox5	DAPI	Sox5/DAPI		Bins	Sox5	DAPI	Sox5/DAPI		Bins	Sox5	DAPI	Sox5/DAPI
	1	131	279	0.469534		1	144	263	0.547529		1	92	229	0.401747		1	170	298	0.57047		1	128	236	0.542373		1	199	363	0.548209
	2	168	304	0.552632		2	165	272	0.606618		2	141	280	0.503571		2	220	363	0.606061		2	147	276	0.532609		2	228	381	0.598425
	3	130	279	0.46595		3	126	262	0.480916		3	111	262	0.423664		3	213	362	0.588398		3	151	258	0.585271		3	201	365	0.550685
	4	54	283	0.190813		4	55	278	0.197842		4	40	257	0.155642		4	142	349	0.406877		4	124	263	0.471483		4	136	340	0.4
	5	2	272	0.00735294		5	12	234	0.0512821		5	7	222	0.0315315		5	38	336	0.113095		5	34	233	0.145923		5	18	381	0.0472441
	6	0	65	0		6	0	34	0		6	3	32	0.09375		6	22	113	0.19469		6	22	82	0.268293		6	6	133	0.0451128
	Total	485	1482	0.32726		Total	502	1343	0.37379		Total	394	1282	0.307332		Total	805	1821	0.442065		Total	606	1348	0.449555		Total	788	1963	0.401426
	ctrl3															cko3
		sa1					sa2					sa3					sa1					sa2					sa3
	Bins	Sox5	DAPI	Sox5/DAPI		Bins	Sox5	DAPI	Sox5/DAPI		Bins	Sox5	DAPI	Sox5/DAPI		Bins	Sox5	DAPI	Sox5/DAPI		Bins	Sox5	DAPI	Sox5/DAPI		Bins	Sox5	DAPI	Sox5/DAPI
	1	146	343	0.425656		1	145	325	0.446154		1	126	362	0.348066		1	151	314	0.480892		1	133	200	0.665		1	126	251	0.501992
	2	217	361	0.601108		2	200	380	0.526316		2	232	418	0.555024		2	178	321	0.554517		2	169	222	0.761261		2	139	261	0.532567
	3	148	354	0.418079		3	186	372	0.5		3	196	389	0.503856		3	184	303	0.607261		3	152	205	0.741463		3	134	248	0.540323
	4	47	347	0.135447		4	58	356	0.162921		4	66	374	0.176471		4	128	337	0.379822		4	137	254	0.53937		4	116	249	0.465863
	5	1	341	0.00293255		5	11	313	0.0351438		5	15	337	0.0445104		5	37	291	0.127148		5	81	315	0.257143		5	35	243	0.144033
	6	1	94	0.0106383		6	13	102	0.127451		6	19	158	0.120253		6	21	119	0.176471		6	30	94	0.319149		6	22	103	0.213592
	Total	560	1840	0.304348		Total	613	1848	0.33171		Total	654	2038	0.320903		Total	699	1685	0.414837		Total	702	1290	0.544186		Total	572	1355	0.42214
	average ctrl					average ctrl2					Average ctrl 3					average cko1					average cko2					average cko3
	Bins	Sox5	DAPI	Sox5/DAPI		Bins	Sox5	DAPI	Sox5/DAPI		Bins	Sox5	DAPI	Sox5/DAPI		Bins	Sox5	DAPI	Sox5/DAPI		Bins	Sox5	DAPI	Sox5/DAPI		Bins	Sox5	DAPI	Sox5/DAPI
	1	131	246	0.53252		1	122.333	257	0.476005		1	139	343.333	0.404854		1	164	246.667	0.664865		1	165.667	299	0.554069		1	136.667	255	0.535948
	2	148	246.333	0.600812		2	158	285.333	0.553738		2	216.333	386.333	0.559965		2	161	258	0.624031		2	198.333	340	0.583333		2	162	268	0.604478
	3	128.333	233.333	0.55		3	122.333	267.667	0.457036		3	176.667	371.667	0.475336		3	150.333	253.667	0.592641		3	188.333	328.333	0.573604		3	156.667	252	0.621693
	4	27.3333	232.667	0.117479		4	49.6667	272.667	0.182152		4	66	359	0.183844		4	95	252.667	0.375989		4	134	317.333	0.422269		4	127	280	0.453571
	5	6	232	0.0258621		5	7	242.667	0.0288462		5	15	330.333	0.0454087		5	14.3333	237.667	0.0603086		5	30	316.667	0.0947368		5	51	283	0.180212
	6	9.33333	113	0.0825959		6	1	43.6667	0.0229008		6	19	118	0.161017		6	21	107	0.196262		6	16.6667	109.333	0.152439		6	24.3333	105.333	0.231013
	Total	450	1303.33	0.345269		Total	460.333	1369	0.336255		Total	632	1908.67	0.331121		Total	605.667	1355.67	0.446767		Total	733	1710.67	0.428488		Total	657.667	1443.33	0.455658
	Average ctrl															Average cko
	Bins	Sox5	DAPI	Sox5/DAPI												Bins	Sox5	DAPI	Sox5/DAPI
	1	130.778	282.111	0.463568												1	155.444	266.889	0.582431
	2	174.111	306	0.568991												2	173.778	288.667	0.602002
	3	142.444	290.889	0.489687												3	165.111	278	0.593925
	4	47.6667	288.111	0.165445												4	118.667	283.333	0.418824
	5	9.33333	268.333	0.0347826												5	31.7778	279.111	0.113854
	6	9.77778	91.5556	0.106796												6	20.6667	107.222	0.192746
	Total	514.111	1527	0.33668												Total	665.444	1503.22	0.442679
		ctrl1	ctrl2	ctrl2	cko1	cko2	cko3		Error ctrl	Error CKO	t-test
		Sox5/DAPI	Sox5/DAPI	Sox5/DAPI	Sox5/DAPI	Sox5/DAPI	Sox5/DAPI		Sox5/DAPI	Sox5/DAPI	Sox5/DAPI
		0.53252	0.476005	0.404854	0.664865	0.554069	0.535948		0.0369346	0.0402932	0.105713
		0.600812	0.553738	0.559965	0.624031	0.583333	0.604478		0.0147632	0.0117514	0.160679
		0.55	0.457036	0.475336	0.592641	0.573604	0.621693		0.028433	0.0139821	0.0324457	*
		0.117479	0.182152	0.183844	0.375989	0.422269	0.453571		0.0218452	0.0225347	0.00122746	***
		0.0258621	0.0288462	0.0454087	0.0603086	0.0947368	0.180212		0.00607953	0.0356434	0.0960568
		0.0825959	0.0229008	0.161017	0.196262	0.152439	0.231013		0.0399927	0.0227326	0.0857784
		0.345269	0.336255	0.331121	0.446767	0.428488	0.455658		0.00413485	0.0079979	0.000296855	***

## Sheet: Tbr1 Ctip2
	ctrl N1																					cko N1
	sa1							sa2							sa3							sa1							sa2							SA3
	bins	tbr1	ctip2	dapi	Tbr1/DAPI	Ctip2/DAPI		bins	tbr1	ctip2	dapi	Tbr1/DAPI	Ctip2/DAPI		bins	tbr1	ctip2	dapi	Tbr1/DAPI	Ctip2/DAPI		bins	tbr1	ctip2	dapi	Tbr1/DAPI	Ctip2/DAPI		bins	tbr1	ctip2	dapi	Tbr1/DAPI	Ctip2/DAPI		C	tbr1	ctip2	dapi	Tbr1/DAPI	Ctip2/DAPI
	1	144	6	217	0.663594	0.0276498		1	149	5	239	0.623431	0.0209205		1	120	2	215	0.55814	0.00930233		1	174	14	263	0.661597	0.0532319		1	193	29	335	0.576119	0.0865672		1	208	12	335	0.620896	0.0358209
	2	144	7	187	0.770053	0.0374332		2	149	4	247	0.603239	0.0161943		2	132	3	217	0.608295	0.0138249		2	187	10	242	0.772727	0.0413223		2	236	9	357	0.661064	0.0252101		2	235	13	362	0.649171	0.0359116
	3	77	78	221	0.348416	0.352941		3	63	98	226	0.278761	0.433628		3	68	69	202	0.336634	0.341584		3	74	98	259	0.285714	0.378378		3	166	99	357	0.464986	0.277311		3	127	143	309	0.411003	0.462783
	4	5	22	215	0.0232558	0.102326		4	2	13	231	0.00865801	0.0562771		4	2	20	192	0.0104167	0.104167		4	3	68	264	0.0113636	0.257576		4	16	123	349	0.0458453	0.352436		4	5	81	298	0.0167785	0.271812
	5	2	3	237	0.00843882	0.0126582		5	4	0	210	0.0190476	0		5	0	1	212	0	0.00471698		5	2	0	253	0.00790514	0		5	2	0	355	0.0056338	0		5	2	0	341	0.0058651	0
	6	8	1	81	0.0987654	0.0123457		6	5	2	92	0.0543478	0.0217391		6	0	0	102	0	0		6	3	0	121	0.0247934	0		6	2	0	123	0.0162602	0		6	7	0	176	0.0397727	0
	total	380	117	1158	0.328152	0.101036		total	372	122	1245	0.298795	0.097992		total	322	95	1140	0.282456	0.0833333		total	443	190	1402	0.315977	0.135521		total	615	260	1876	0.327825	0.138593		total	584	249	1821	0.320703	0.136738
	ctrl N2																					cko N2
	sa1							sa2							sa3							sa1							sa2							sa3
	bins	tbr1	ctip2	dapi	Tbr1/DAPI	Ctip2/DAPI		bins	tbr1	ctip2	dapi	Tbr1/DAPI	Ctip2/DAPI		bins	tbr1	ctip2	dapi	Tbr1/DAPI	Ctip2/DAPI		bins	tbr1	ctip2	dapi	Tbr1/DAPI	Ctip2/DAPI		bins	tbr1	ctip2	dapi	Tbr1/DAPI	Ctip2/DAPI		bins	tbr1	ctip2	dapi	Tbr1/DAPI	Ctip2/DAPI
	1	145	1	300	0.483333	0.00333333		1	129	13	337	0.382789	0.0385757		1	157	6	288	0.545139	0.0208333		1	120	27	230	0.521739	0.117391		1	170	14	277	0.613718	0.0505415		1	186	9	314	0.592357	0.0286624
	2	196	0	310	0.632258	0		2	178	1	348	0.511494	0.00287356		2	191	4	282	0.677305	0.0141844		2	151	15	238	0.634454	0.0630252		2	199	9	325	0.612308	0.0276923		2	237	7	328	0.722561	0.0213415
	3	115	74	326	0.352761	0.226994		3	95	64	319	0.297806	0.200627		3	131	50	279	0.469534	0.179211		3	148	44	254	0.582677	0.173228		3	178	56	307	0.579805	0.18241		3	195	75	300	0.65	0.25
	4	5	40	288	0.0173611	0.138889		4	0	67	273	0	0.245421		4	9	54	274	0.0328467	0.19708		4	21	86	248	0.0846774	0.346774		4	68	73	303	0.224422	0.240924		4	53	122	287	0.184669	0.425087
	5	3	0	238	0.012605	0		5	0	0	308	0	0		5	5	0	239	0.0209205	0		5	27	3	224	0.120536	0.0133929		5	52	5	304	0.171053	0.0164474		5	39	0	349	0.111748	0
	6	4	0	130	0.0307692	0		6	0	0	93	0	0		6	1	0	82	0.0121951	0		6	2	1	85	0.0235294	0.0117647		6	20	1	91	0.21978	0.010989		6	16	2	126	0.126984	0.015873
	total	468	115	1592	0.29397	0.0722362		total	402	145	1678	0.239571	0.0864124		total	494	114	1444	0.342105	0.0789474		total	469	176	1279	0.366693	0.137608		total	687	158	1607	0.427505	0.0983199		total	726	215	1704	0.426056	0.126174
	ctrl N3																					ckoN3
	sa1							sa2							SA3							sa1							sa2							sa3
	bins	tbr1	ctip2	dapi	Tbr1/DAPI	Ctip2/DAPI		bins	tbr1	ctip2	dapi	Tbr1/DAPI	Ctip2/DAPI		bins	tbr1	ctip2	dapi	Tbr1/DAPI	Ctip2/DAPI		bins	tbr1	ctip2	dapi	Tbr1/DAPI	Ctip2/DAPI		bins	tbr1	ctip2	dapi	Tbr1/DAPI	Ctip2/DAPI		bins	tbr1	ctip2	dapi	Tbr1/DAPI	Ctip2/DAPI
	1	182	23	313	0.58147	0.0734824		1	155	17	281	0.551601	0.0604982		1	165	30	343	0.48105	0.0874636		1	143	16	247	0.578947	0.0647773		1	158	45	312	0.50641	0.144231		1	134	8	278	0.482014	0.028777
	2	232	7	316	0.734177	0.0221519		2	177	3	297	0.59596	0.010101		2	218	20	354	0.615819	0.0564972		2	191	6	232	0.823276	0.0258621		2	192	15	298	0.644295	0.0503356		2	171	4	266	0.642857	0.0150376
	3	165	44	317	0.520505	0.138801		3	115	48	286	0.402098	0.167832		3	214	33	331	0.646526	0.0996979		3	79	47	260	0.303846	0.180769		3	163	84	289	0.564014	0.290657		3	135	71	260	0.519231	0.273077
	4	0	64	289	0	0.221453		4	0	74	273	0	0.271062		4	1	98	327	0.0030581	0.299694		4	1	92	224	0.00446429	0.410714		4	16	124	324	0.0493827	0.382716		4	23	68	275	0.0836364	0.247273
	5	0	0	312	0	0		5	0	1	287	0	0.00348432		5	0	0	319	0	0		5	0	4	257	0	0.0155642		5	6	7	291	0.0206186	0.024055		5	7	0	267	0.0262172	0
	6	0	3	96	0	0.03125		6	0	6	108	0	0.0555556		6	2	0	139	0.0143885	0		6	0	1	101	0	0.00990099		6	8	8	115	0.0695652	0.0695652		6	5	6	101	0.049505	0.0594059
	total	579	141	1643	0.352404	0.0858186		total	447	149	1532	0.291775	0.0972585		total	600	181	1813	0.330943	0.0998345		total	414	166	1321	0.313399	0.125662		total	543	283	1629	0.333333	0.173726		total	475	157	1447	0.328265	0.1085
	Average ctrl1							Average ctrl2							Average ctrl3							Average cko1							Average cko2							Average cko3
	bins	tbr1	ctip2	dapi	Tbr1/DAPI	Ctip2/DAPI		bins	tbr1	ctip2	dapi	Tbr1/DAPI	Ctip2/DAPI		bins	tbr1	ctip2	dapi	Tbr1/DAPI	Ctip2/DAPI		bins	tbr1	ctip2	dapi	Tbr1/DAPI	Ctip2/DAPI		bins	tbr1	ctip2	dapi	Tbr1/DAPI	Ctip2/DAPI		bins	tbr1	ctip2	dapi	Tbr1/DAPI	Ctip2/DAPI
	1	137.667	4.33333	223.667	0.615499	0.0193741		1	143.667	6.66667	308.333	0.465946	0.0216216		1	167.333	23.3333	312.333	0.535752	0.0747065		1	191.667	18.3333	311	0.616292	0.0589496		1	158.667	16.6667	273.667	0.579781	0.0609013		1	145	23	279	0.519713	0.0824373
	2	141.667	4.66667	217	0.652842	0.0215054		2	188.333	1.66667	313.333	0.601064	0.00531915		2	209	10	322.333	0.648397	0.0310238		2	219.333	10.6667	320.333	0.684703	0.0332986		2	195.667	10.3333	297	0.65881	0.0347924		2	184.667	8.33333	265.333	0.69598	0.031407
	3	69.3333	81.6667	216.333	0.320493	0.377504		3	113.667	62.6667	308	0.369048	0.203463		3	164.667	41.6667	311.333	0.528908	0.133833		3	122.333	113.333	308.333	0.396757	0.367568		3	173.667	58.3333	287	0.60511	0.203252		3	125.667	67.3333	269.667	0.466007	0.249691
	4	3	18.3333	212.667	0.0141066	0.0862069		4	4.66667	53.6667	278.333	0.0167665	0.192814		4	0.333333	78.6667	296.333	0.00112486	0.265467		4	8	90.6667	303.667	0.0263447	0.298573		4	47.3333	93.6667	279.333	0.169451	0.335322		4	13.3333	94.6667	274.333	0.0486027	0.345079
	5	2	1.33333	219.667	0.0091047	0.0060698		5	2.66667	0	261.667	0.0101911	0		5	0	0.333333	306	0	0.00108932		5	2	0	316.333	0.00632244	0		5	39.3333	2.66667	292.333	0.13455	0.00912201		5	4.33333	3.66667	271.667	0.0159509	0.0134969
	6	4.33333	1	91.6667	0.0472727	0.0109091		6	1.66667	0	101.667	0.0163934	0		6	0.666667	3	114.333	0.0058309	0.0262391		6	4	0	140	0.0285714	0		6	12.6667	1.33333	100.667	0.125828	0.013245		6	4.33333	5	105.667	0.0410095	0.0473186
	total	358	111.333	1181	0.303133	0.0942704		total	454.667	124.667	1571.33	0.289351	0.0793381		total	542	157	1662.67	0.325982	0.0944266		total	547.333	233	1699.67	0.322024	0.137086		total	627.333	183	1530	0.410022	0.119608		total	477.333	202	1465.67	0.325677	0.137821
	V		100	429		0.2331		V		116.333	586.333		0.198408		V		120.333	607.667		0.198025		V		204	612		0.333333		V		152	566.333		0.268393		V		162	544		0.297794
	VI	348.667		657	0.530695			VI	445.667		929.667	0.479383			VI	541		946	0.571882			VI	533.333		939.667	0.567577			VI	528		857.667	0.615624			VI	455.333		814	0.559378
Average ctrl	bins	tbr1	ctip2	dapi	Tbr1/DAPI	Ctip2/DAPI															Average cko	bins	tbr1	ctip2	dapi	Tbr1/DAPI	Ctip2/DAPI
	1	149.556	11.4444	281.444	0.531386	0.0406632																1	165.111	19.3333	287.889	0.573524	0.0671555
	2	179.667	5.44444	284.222	0.632134	0.0191556																2	199.889	9.77778	294.222	0.679381	0.0332326
	3	115.889	62	278.556	0.416035	0.222577																3	140.556	79.6667	288.333	0.487476	0.276301
	4	2.66667	50.2222	262.444	0.0101609	0.191363																4	22.8889	93	285.778	0.0800933	0.325428
	5	1.55556	0.555556	262.444	0.00592718	0.00211685																5	15.2222	2.11111	293.444	0.0518743	0.00719424
	6	2.22222	1.33333	102.556	0.0216685	0.0130011																6	7	2.11111	115.444	0.0606352	0.0182868
	total	451.556	131	1471.67	0.306833	0.0890147																total	550.667	206	1565.11	0.351839	0.13162
	V		112.222	541		0.207435																V		172.667	574.111		0.300755
	VI	445.111		844.222	0.527244																	VI	505.556		870.444	0.580802
	ctrl1	ctrl2	ctrl2	cko1	cko2	cko3
bins	Tbr1/DAPI	Tbr1/DAPI	Tbr1/DAPI	Tbr1/DAPI	Tbr1/DAPI	Tbr1/DAPI	stdev ctrl	stdev cko	t-test
1	0.615499	0.465946	0.535752	0.616292	0.579781	0.519713	0.0432041	0.0281548	0.558601
2	0.652842	0.601064	0.648397	0.684703	0.65881	0.69598	0.0165683	0.011003	0.0830056
3	0.320493	0.369048	0.528908	0.396757	0.60511	0.466007	0.0629593	0.0612629	0.397513
4	0.0141066	0.0167665	0.00112486	0.0263447	0.169451	0.0486027	0.00483195	0.0444592	0.188556
5	0.0091047	0.0101911	0	0.00632244	0.13455	0.0159509	0.00323122	0.0412314	0.329832
6	0.0472727	0.0163934	0.0058309	0.0285714	0.125828	0.0410095	0.0124332	0.0305575	0.272223
total	0.303133	0.289351	0.325982	0.322024	0.410022	0.325677	0.010682	0.0287432	0.204639
VI	0.530695	0.479383	0.571882	0.567577	0.615624	0.559378	0.0267552	0.0175426	0.169553
bins	Ctip2/DAPI	Ctip2/DAPI	Ctip2/DAPI	Ctip2/DAPI	Ctip2/DAPI	Ctip2/DAPI	stdev ctrl	stdev cko	t-test
1	0.0193741	0.0216216	0.0747065	0.0589496	0.0609013	0.0824373	0.0180812	0.00752505	0.214564
2	0.0215054	0.00531915	0.0310238	0.0332986	0.0347924	0.031407	0.00750305	0.000979509	0.140446
3	0.377504	0.203463	0.133833	0.367568	0.203252	0.249691	0.0724623	0.0489053	0.707512
4	0.0862069	0.192814	0.265467	0.298573	0.335322	0.345079	0.0520564	0.0141588	0.0549642	*
5	0.0060698	0	0.00108932	0	0.00912201	0.0134969	0.00186837	0.00397575	0.305845
6	0.0109091	0	0.0262391	0	0.013245	0.0473186	0.00761032	0.0140939	0.651549
total	0.0942704	0.0793381	0.0944266	0.137086	0.119608	0.137821	0.00500366	0.00595233	0.00561044	**
V	0.2331	0.198408	0.198025	0.333333	0.268393	0.297794	0.0116284	0.0187745	0.0151585	**

## Sheet: rorb
																		cko N1
	ctrl N1
																		sa1					sa2
	sa1					sa2					sa3
																		bins	rorb	dapi	rorb/DAPI		bins	rorb	dapi	rorb/DAPI
	bins	rorb	dapi	rorb/DAPI		bins	rorb	dapi	rorb/DAPI		bins	rorb	dapi	rorb/DAPI				1	2	247	0.00809717		1	3	206	0.0145631
	1	12	255	0.0470588		1	7	340	0.0205882		1	6	179	0.0335196				2	2	267	0.00749064		2	2	214	0.00934579
	2	15	249	0.060241		2	15	354	0.0423729		2	11	180	0.0611111				3	11	246	0.0447154		3	8	232	0.0344828
	3	85	219	0.388128		3	120	312	0.384615		3	57	186	0.306452				4	137	253	0.541502		4	85	235	0.361702
	4	206	259	0.795367		4	244	347	0.70317		4	161	169	0.952663				5	80	237	0.337553		5	86	218	0.394495
	5	96	272	0.352941		5	31	314	0.0987261		5	61	192	0.317708				6	0	93	0		6	0	110	0
	6	26	128	0.203125		6	10	126	0.0793651		6	7	89	0.0786517				total	232	1343	0.172748		total	184	1215	0.15144
	total	440	1382	0.318379		total	427	1793	0.238148		total	303	995	0.304523				cko N2
	ctrl N2																	sa1					sa2
	sa1					sa2					sa3
																		bins	rorb	dapi	rorb/DAPI		bins	rorb	dapi	rorb/DAPI
	bins	rorb	dapi	rorb/DAPI		bins	rorb	dapi	rorb/DAPI		bins	rorb	dapi	rorb/DAPI				1	7	278	0.0251799		1	1	287	0.00348432
	1	1	323	0.00309598		1	4	297	0.013468		1	0	286	0				2	54	268	0.201493		2	28	260	0.107692
	2	13	325	0.04		2	17	285	0.0596491		2	15	283	0.0530035				3	153	274	0.558394		3	127	293	0.433447
	3	100	316	0.316456		3	123	292	0.421233		3	153	280	0.546429				4	65	292	0.222603		4	73	266	0.274436
	4	211	290	0.727586		4	221	286	0.772727		4	226	276	0.818841				5	0	243	0		5	0	238	0
	5	69	263	0.262357		5	39	265	0.14717		5	26	274	0.0948905				6	1	85	0.0117647		6	0	79	0
	6	3	100	0.03		6	2	110	0.0181818		6	0	104	0				total	280	1440	0.194444		total	229	1423	0.160928
	total	397	1617	0.245516		total	406	1535	0.264495		total	420	1503	0.279441				cko N3
	ctrl N3																	sa1					sa2
	sa1					sa2					sa3
																		bins	rorb	dapi	rorb/DAPI		bins	rorb	dapi	rorb/DAPI
	bins	rorb	dapi	rorb/DAPI		bins	rorb	dapi	rorb/DAPI		bins	rorb	dapi	rorb/DAPI				1	5	216	0.0231481		1	3	271	0.0110701
	1	16	257	0.0622568		1	12	268	0.0447761		1	4	219	0.0182648				2	5	243	0.0205761		2	23	282	0.0815603
	2	50	261	0.191571		2	13	265	0.0490566		2	38	209	0.181818				3	27	239	0.112971		3	143	263	0.543726
	3	145	247	0.587045		3	73	274	0.266423		3	97	201	0.482587				4	80	248	0.322581		4	114	268	0.425373
	4	184	217	0.847926		4	183	265	0.690566		4	171	216	0.791667				5	91	202	0.450495		5	0	253	0
	5	100	217	0.460829		5	128	241	0.53112		5	74	204	0.362745				6	2	83	0.0240964		6	2	61	0.0327869
	6	4	131	0.0305344		6	5	110	0.0454545		6	2	70	0.0285714				total	210	1231	0.170593		total	285	1398	0.203863
	total	499	1330	0.375188		total	414	1423	0.290935		total	386	1119	0.344951
																		Average cko1					Average cko2					Average cko3
	Average ctrl1					Average ctrl2					Average ctrl3
																		bins	rorb	dapi	rorb/DAPI		bins	rorb	dapi	rorb/DAPI		bins	rorb	dapi	rorb/DAPI
	bins	rorb	dapi	rorb/DAPI		bins	rorb	dapi	rorb/DAPI		bins	rorb	dapi	rorb/DAPI				1	2.5	226.5	0.0110375		1	4	282.5	0.0141593		1	4	243.5	0.0164271
	1	8.33333	258	0.0322997		1	1.66667	302	0.00551876		1	10.6667	248	0.0430108				2	2	240.5	0.00831601		2	41	264	0.155303		2	14	262.5	0.0533333
	2	13.6667	261	0.0523627		2	15	297.667	0.0503919		2	33.6667	245	0.137415				3	9.5	239	0.039749		3	140	283.5	0.493827		3	85	251	0.338645
	3	87.3333	239	0.365411		3	125.333	296	0.423423		3	105	240.667	0.436288				4	111	244	0.454918		4	69	279	0.247312		4	97	258	0.375969
	4	203.667	258.333	0.788387		4	219.333	284	0.7723		4	179.333	232.667	0.770774				5	83	227.5	0.364835		5	0	240.5	0		5	45.5	227.5	0.2
	5	62.6667	259.333	0.241645		5	44.6667	267.333	0.167082		5	100.667	220.667	0.456193				6	0	101.5	0		6	0.5	82	0.00609756		6	2	72	0.0277778
	6	14.3333	114.333	0.125364		6	1.66667	104.667	0.0159236		6	3.66667	103.667	0.0353698				total	208	1279	0.162627		total	254.5	1431.5	0.177786		total	247.5	1314.5	0.188285
	total	390	1390	0.280576		total	407.667	1551.67	0.262728		total	433	1290.67	0.335486
																		Average cko
	Average ctrl																	bins	rorb	dapi	rorb/DAPI
	bins	rorb	dapi	rorb/DAPI														1	3.5	250.833	0.0139535
	1	6.88889	269.333	0.0255776														2	19	255.667	0.0743155
	2	20.7778	267.889	0.0775612														3	78.1667	257.833	0.303167
	3	105.889	258.556	0.40954														4	92.3333	260.333	0.354673
	4	200.778	258.333	0.777204														5	42.8333	231.833	0.184759
	5	69.3333	249.111	0.278323														6	0.833333	85.1667	0.00978474
	6	6.55556	107.556	0.0609504														total	236.667	1341.67	0.176398
	total	410.222	1410.78	0.290777
		rorb/DAPI	rorb/DAPI	rorb/DAPI	rorb/DAPI	rorb/DAPI	rorb/DAPI	stdev ctrl	stdev cko	t-test
		0.0322997	0.00551876	0.0430108	0.0110375	0.0141593	0.0164271	0.0111495	0.00156233	0.310289
		0.0523627	0.0503919	0.137415	0.00831601	0.155303	0.0533333	0.0286849	0.0434802	0.889081
		0.365411	0.423423	0.436288	0.039749	0.493827	0.338645	0.0218001	0.133252	0.432805
		0.788387	0.7723	0.770774	0.454918	0.247312	0.375969	0.00563395	0.0605007	0.00234483	**
		0.241645	0.167082	0.456193	0.364835	0	0.2	0.0866589	0.105482	0.504346
		0.125364	0.0159236	0.0353698	0	0.00609756	0.0277778	0.03371	0.00842884	0.242636
	Total	0.280576	0.262728	0.335486	0.162627	0.177786	0.188285	0.0218927	0.00744727	0.00724924	**

## Sheet: Cux1
	Ctrl N1															cko N1
		sa1					sa2					sa3					sa1					sa2					sa3
	Bins	cux1	DAPI	cux1/DAPI		Bins	cux1	DAPI	cux1/DAPI		Bins	cux1	DAPI	cux1/DAPI		Bins	cux1	DAPI	cux1/DAPI		Bins	cux1	DAPI	cux1/DAPI		Bins	cux1	DAPI	cux1/DAPI
	1	42	302	0.139073		1	66	257	0.256809		1	52	337	0.154303		1	64	261	0.245211		1	62	293	0.211604		1	59	276	0.213768
	2	53	302	0.175497		2	94	261	0.360153		2	73	351	0.207977		2	87	241	0.360996		2	111	265	0.418868		2	101	253	0.399209
	3	79	286	0.276224		3	107	290	0.368966		3	82	320	0.25625		3	102	271	0.376384		3	167	254	0.65748		3	139	262	0.530534
	4	196	299	0.655518		4	236	269	0.877323		4	251	322	0.779503		4	212	255	0.831373		4	200	263	0.760456		4	200	244	0.819672
	5	249	249	1		5	250	252	0.992063		5	313	342	0.915205		5	210	271	0.774908		5	235	231	1.01732		5	201	257	0.782101
	6	83	121	0.68595		6	98	125	0.784		6	107	108	0.990741		6	81	110	0.736364		6	108	115	0.93913		6	113	147	0.768707
	Total	702	1559	0.450289		Total	851	1454	0.585282		Total	878	1780	0.493258		Total	756	1409	0.536551		Total	883	1421	0.621393		Total	813	1439	0.564976
	ctrl N2															cko N2
		sa1					sa2					sa3					sa1					sa2
	Bins	cux1	DAPI	cux1/DAPI		Bins	cux1	DAPI	cux1/DAPI		Bins	cux1	DAPI	cux1/DAPI		Bins	cux1	DAPI	cux1/DAPI		Bins	cux1	DAPI	cux1/DAPI
	1	45	370	0.121622		1	61	325	0.187692		1	28	322	0.0869565		1	48	196	0.244898		1	35	250	0.14
	2	71	376	0.18883		2	82	336	0.244048		2	50	323	0.154799		2	80	223	0.358744		2	103	202	0.509901
	3	121	373	0.324397		3	145	329	0.440729		3	105	279	0.376344		3	143	227	0.629956		3	105	238	0.441176
	4	184	336	0.547619		4	258	327	0.788991		4	293	337	0.869436		4	200	211	0.947867		4	194	230	0.843478
	5	272	283	0.961131		5	295	356	0.828652		5	321	316	1.01582		5	188	203	0.926108		5	144	216	0.666667
	6	148	148	1		6	173	177	0.977401		6	90	142	0.633803		6	60	83	0.722892		6	24	54	0.444444
	Total	841	1886	0.445917		Total	1014	1850	0.548108		Total	887	1719	0.515998		Total	719	1143	0.629046		Total	605	1190	0.508403
	ctrl N3															cko N3
		sa1					sa2					sa3					sa1					sa2
	Bins	cux1	DAPI	cux1/DAPI		Bins	cux1	DAPI	cux1/DAPI		Bins	cux1	DAPI	cux1/DAPI		Bins	cux1	DAPI	cux1/DAPI		Bins	cux1	DAPI	cux1/DAPI
	1	14	252	0.0555556		1	70	295	0.237288		1			#DIV/0!		1	18	291	0.0618557		1	14	261	0.0536398
	2	55	225	0.244444		2	76	270	0.281481		2			#DIV/0!		2	42	311	0.135048		2	62	251	0.247012
	3	104	235	0.442553		3	120	260	0.461538		3			#DIV/0!		3	59	309	0.190939		3	95	282	0.336879
	4	175	226	0.774336		4	177	260	0.680769		4			#DIV/0!		4	93	299	0.311037		4	180	261	0.689655
	5	196	251	0.780876		5	212	223	0.950673		5			#DIV/0!		5	264	319	0.827586		5	246	238	1.03361
	6	101	130	0.776923		6	60	80	0.75		6			#DIV/0!		6	144	145	0.993103		6	152	130	1.16923
	Total	645	1319	0.489007		Total	715	1388	0.51513		Total	0	0	#DIV/0!		Total	620	1674	0.37037		Total	749	1423	0.526353
	average ctrl1					average ctrl2					average ctrl3					average cko N1					average CKO N2					average CKO N3
	Bins	cux1	DAPI	cux1/DAPI		Bins	cux1	DAPI	cux1/DAPI		Bins	cux1	DAPI	cux1/DAPI		Bins	cux1	DAPI	cux1/DAPI		Bins	cux1	DAPI	cux1/DAPI		Bins	cux1	DAPI	cux1/DAPI
	1	53.3333	298.667	0.178571		1	44.6667	339	0.13176		1	42	273.5	0.153565		1	61.6667	276.667	0.222892		1	41.5	223	0.186099		1	16	276	0.057971
	2	73.3333	304.667	0.2407		2	67.6667	345	0.196135		2	65.5	247.5	0.264646		2	99.6667	253	0.393939		2	91.5	212.5	0.430588		2	52	281	0.185053
	3	89.3333	298.667	0.299107		3	123.667	327	0.378186		3	112	247.5	0.452525		3	136	262.333	0.518424		3	124	232.5	0.533333		3	77	295.5	0.260575
	4	227.667	296.667	0.767416		4	245	333.333	0.735		4	176	243	0.72428		4	204	254	0.80315		4	197	220.5	0.893424		4	136.5	280	0.4875
	5	270.667	281	0.963227		5	296	318.333	0.929843		5	204	237	0.860759		5	215.333	253	0.85112		5	166	209.5	0.792363		5	255	278.5	0.915619
	6	96	118	0.813559		6	137	155.667	0.880086		6	80.5	105	0.766667		6	100.667	124	0.811828		6	42	68.5	0.613139		6	148	137.5	1.07636
	Total	810.333	1597.67	0.507198		Total	914	1818.33	0.502658		Total	680	1353.5	0.502401		Total	817.333	1423	0.574373		Total	662	1166.5	0.56751		Total	684.5	1548.5	0.442041
	UL	594.333	695.667	0.854336		UL	678	807.333	0.839802		UL	460.5	585	0.787179		UL	520	631	0.824089		UL	405	498.5	0.812437		UL	539.5	696	0.775144
	Average ctrl															Average cko
	Bins	cux1	DAPI	cux1/DAPI												Bins	cux1	DAPI	cux1/DAPI
	1	46.6667	303.722	0.153649												1	39.7222	258.556	0.153631
	2	68.8333	299.056	0.230169												2	81.0556	248.833	0.325742
	3	108.333	291.056	0.372208												3	112.333	263.444	0.426402
	4	216.222	291	0.743032												4	179.167	251.5	0.712392
	5	256.889	278.778	0.921483												5	212.111	247	0.858749
	6	104.5	126.222	0.827905												6	96.8889	110	0.880808
	Total	801.444	1589.83	0.504106												Total	721.278	1379.33	0.522918					Cux1 UL
	UL	577.611	696	0.829901												UL	488.167	608.5	0.802246
	Bins	ctrl1	ctrl2	ctrl3	cko1	cko2	cko3		Error ctrl	Error CKO	t-test
	1	0.178571	0.13176	0.153565	0.222892	0.186099	0.057971		0.0135238	0.0499829	0.985204
	2	0.2407	0.196135	0.264646	0.393939	0.430588	0.185053		0.0200738	0.0764722	0.263775
	3	0.299107	0.378186	0.452525	0.518424	0.533333	0.260575		0.044295	0.0885392	0.572105
	4	0.767416	0.735	0.72428	0.80315	0.893424	0.4875		0.0129666	0.123053	0.91412
	5	0.963227	0.929843	0.860759	0.85112	0.792363	0.915619		0.0301722	0.035594	0.236587
	6	0.813559	0.880086	0.766667	0.811828	0.613139	1.07636		0.0329044	0.134171	0.925921
	Total	0.507198	0.502658	0.502401	0.574373	0.56751	0.442041		0.00155788	0.0430126	0.60845
	UL	0.854336	0.839802	0.787179	0.824089	0.812437	0.775144		0.0203994	0.0147614	0.408707
																																Cux1 total

## Sheet: DAPI
		ctrl1
											CKO1
	sa1			SA2			SA3				sa1			SA2			SA3
	Bins	DAPI		Bins	DAPI		Bins	DAPI			Bins	DAPI		Bins	DAPI		Bins	DAPI
	1	240		1	247		1	251			1	223		1	256		1	261
	2	190		2	278		2	271			2	261		2	228		2	285
	3	213		3	247		3	240			3	218		3	265		3	278
	4	192		4	261		4	245			4	213		4	254		4	291
	5	207		5	249		5	240			5	216		5	251		5	246
	6	95		6	109		6	135			6	126		6	90		6	105
	Total	1137		Total	1391		Total	1382			Total	1257		Total	1344		Total	1466
	ctrl2										CKO2
	sa1			SA2			SA3				sa1			SA2			SA3
	Bins	DAPI		Bins	DAPI		Bins	DAPI			Bins	DAPI		Bins	DAPI		Bins	DAPI
	1	279		1	263		1	229			1	298		1	236		1	363
	2	304		2	272		2	280			2	363		2	276		2	381
	3	279		3	262		3	262			3	362		3	258		3	365
	4	283		4	278		4	257			4	349		4	263		4	340
	5	272		5	234		5	222			5	336		5	233		5	381
	6	65		6	34		6	32			6	113		6	82		6	133
	Total	1482		Total	1343		Total	1282			Total	1821		Total	1348		Total	1963
	ctrl3										CKO3
	sa1			SA2			SA3				sa1			SA2			SA3
	Bins	DAPI		Bins	DAPI		Bins	DAPI			Bins	DAPI		Bins	DAPI		Bins	DAPI
	1	343		1	325		1	362			1	314		1	200		1	251
	2	361		2	380		2	418			2	321		2	222		2	261
	3	354		3	372		3	389			3	303		3	205		3	248
	4	347		4	356		4	374			4	337		4	254		4	249
	5	341		5	313		5	337			5	291		5	315		5	243
	6	94		6	102		6	158			6	119		6	94		6	103
	Total	1840		Total	1848		Total	2038			Total	1685		Total	1290		Total	1355
															DAPI bins								DAPI total
	Average ctrl1	Average ctrl2	Average ctrl3	average CKO1	average cko2	average cko3		Error ctrl	Error CKO	t-test
Bins	DAPI	DAPI	DAPI	DAPI	DAPI	DAPI		DAPI	DAPI	DAPI
1	246	257	343.333	246.667	299	255		30.7754	16.2348	0.684345
2	246.333	285.333	386.333	258	340	268		41.7146	25.8285	0.741708
3	233.333	267.667	371.667	253.667	328.333	252		41.5872	25.1713	0.804004
4	232.667	272.667	359	252.667	317.333	280		37.2779	18.7419	0.914352
5	232	242.667	330.333	237.667	316.667	283		31.1526	22.8881	0.794213
6	113	43.6667	118	107	109.333	105.333		23.9879	1.16003	0.549768
Total	1303.33	1369	1908.67	1355.67	1710.67	1443.33		191.773	106.765	0.918949
Bins	DAPI average ctrl	average cko
1	282.111	266.889
2	306	288.667
3	290.889	278
4	288.111	283.333
5	268.333	279.111
6	91.5556	107.222
Total	1527	1503.22
