# Supplementary material for: Pum2 and TDP-43 refine area-specific cytoarchitecture post-mitotically and modulate translation of Sox5, Bcl11b, and Rorb mRNAs in developing mouse neocortex
Source: eLife. 2022 Mar 9;11:e55199. doi: 10.7554/eLife.55199 (PMC8906809; doi:10.7554/eLife.55199)
Supplement: Source data 2. — Quantification of results from n = 3 mice of controls and TDP43A315T in the prospective somatosensory cortex (pS) for Sox5, Bcl11b, Rorβ, and DAPI in single bins (Figure 1b) and total (or layer V for Bcl11b) (Figure 1—figure supplement 5b) and Tbr1, Cux1 in single bins (Figure 1—figure supplement 6b). All markers are normalized to DAPI cells. Distribution of cells across six equal-sized bins is shown. For Bcl11b, only high-expressing neurons were counted. Data are shown as means ± standard error of the mean (SEM), n = 3 for each genotype. *p≤0.05, **p≤0.01, ***p≤0.001, two-tailed t-test. Pum2 cKO: Pum2fl/fl; Emx1Cre; II–IV, V, VI: layers II–IV, V, and VI. [file elife-55199-data2.xlsx]

## Sheet: sox5
315T
315T N1	bins	Sox5	DAPI	Sox5/DAPI		bins	Sox5	DAPI	Sox5/DAPI		bins	Sox5	DAPI	Sox5/DAPI		ctrl N1	bins	Sox5	DAPI	Sox5/DAPI		bins	Sox5	DAPI	Sox5/DAPI		bins	Sox5	DAPI	Sox5/DAPI
	1	323	386	0.836788		1	280	349	0.802292		1	277	323	0.857585			1	174	265	0.656604		1	183	274	0.667883		1	149	239	0.623431
	2	348	395	0.881013		2	329	329	1		2	358	321	1.11526			2	205	264	0.776515		2	214	298	0.718121		2	165	237	0.696203
	3	259	368	0.703804		3	258	339	0.761062		3	242	278	0.870504			3	97	262	0.370229		3	134	291	0.460481		3	118	232	0.508621
	4	97	370	0.262162		4	148	323	0.458204		4	89	242	0.367769			4	2	228	0.00877193		4	25	266	0.093985		4	16	202	0.0792079
	5	4	347	0.0115274		5	6	263	0.0228137		5	0	264	0			5	0	253	0		5	0	240	0		5	0	228	0
	6	14	143	0.0979021		6	0	110	0		6	0	175	0			6	0	142	0		6	2	142	0.0140845		6	1	132	0.00757576
	Total	1045	2009	0.520159		Total	1021	1713	0.59603		Total	966	1603	0.60262			Total	478	1414	0.338048		Total	558	1511	0.369292		Total	449	1270	0.353543
315 T N2	bins	Sox5	DAPI	Sox5/DAPI		bins	Sox5	DAPI	Sox5/DAPI		bins	Sox5	DAPI	Sox5/DAPI		ctrl N2	bins	sox5	dapi	Sox5/DAPI		bins	sox5	dapi	Sox5/DAPI		bins	sox5	dapi	Sox5/DAPI
	1	243	338	0.718935		1	186	311	0.598071		1	176	294	0.598639			1	190	239	0.794979		1	181	244	0.741803		1	170	254	0.669291
	2	329	333	0.987988		2	313	348	0.899425		2	266	331	0.803625			2	219	253	0.865613		2	195	241	0.809129		2	181	246	0.735772
	3	282	346	0.815029		3	223	350	0.637143		3	341	343	0.994169			3	124	260	0.476923		3	149	274	0.543796		3	81	269	0.301115
	4	158	346	0.456647		4	101	326	0.309816		4	220	329	0.668693			4	2	257	0.0077821		4	7	254	0.0275591		4	0	281	0
	5	19	313	0.0607029		5	7	300	0.0233333		5	50	302	0.165563			5	0	264	0		5	1	257	0.00389105		5	0	268	0
	6	17	136	0.125		6	5	147	0.0340136		6	9	139	0.0647482			6	0	152	0		6	7	167	0.0419162		6	1	173	0.00578035
	Total	1048	1812	0.578366		Total	835	1782	0.468575		Total	1062	1738	0.611047			Total	535	1425	0.375439		Total	540	1437	0.375783		Total	433	1491	0.290409
315 T N3	bins	Sox5	DAPI	Sox5/DAPI		bins	Sox5	DAPI	Sox5/DAPI		bins	Sox5	DAPI	Sox5/DAPI		ctrl N3	bins	sox5	dapi	Sox5/DAPI		bins	sox5	dapi	Sox5/DAPI		bins	sox5	dapi	Sox5/DAPI
	1	128	295	0.433898		1	140	257	0.544747		1	139	238	0.584034			1	184	206	0.893204		1	118	216	0.546296		1	120	197	0.609137
	2	281	323	0.869969		2	245	311	0.787781		2	234	279	0.83871			2	143	287	0.498258		2	166	259	0.640927		2	141	188	0.75
	3	294	344	0.854651		3	268	303	0.884488		3	238	290	0.82069			3	130	199	0.653266		3	102	245	0.416327		3	101	212	0.476415
	4	216	347	0.622478		4	193	312	0.61859		4	177	294	0.602041			4	28	217	0.129032		4	17	278	0.0611511		4	16	196	0.0816327
	5	10	278	0.0359712		5	7	281	0.024911		5	6	270	0.0222222			5	2	219	0.00913242		5	1	224	0.00446429		5	2	228	0.00877193
	6	8	137	0.0583942		6	1	126	0.00793651		6	2	106	0.0188679			6	4	113	0.0353982		6	0	107	0		6	4	123	0.0325203
	Total	937	1724	0.543503		Total	854	1590	0.537107		Total	796	1477	0.53893			Total	491	1241	0.395649		Total	404	1329	0.303988		Total	384	1144	0.335664
Average	315T N1					315T N2					315T N3						Average ctl1					average ctrl2					average ctrl3
	bins	sox5	dapi	sox5/DAPI		bins	sox5	dapi	sox5/DAPI		bins	sox5	dapi	sox5/DAPI			bins	sox5	dapi	sox5/DAPI		bins	sox5	dapi	sox5/DAPI		bins	sox5	dapi	sox5/DAPI
	1	293.333	352.667	0.831758		1	201.667	314.333	0.641569		1	135.667	263.333	0.51519			1	168.667	259.333	0.650386		1	180.333	245.667	0.734057		1	140.667	206.333	0.681745
	2	345	348.333	0.990431		2	302.667	337.333	0.897233		2	253.333	304.333	0.832421			2	194.667	266.333	0.730914		2	198.333	246.667	0.804054		2	150	244.667	0.613079
	3	253	328.333	0.770558		3	282	346.333	0.814244		3	266.667	312.333	0.853789			3	116.333	261.667	0.444586		3	118	267.667	0.440847		3	111	218.667	0.507622
	4	111.333	311.667	0.357219		4	159.667	333.667	0.478521		4	195.333	317.667	0.6149			4	14.3333	232	0.0617816		4	3	264	0.0113636		4	20.3333	230.333	0.0882779
	5	3.33333	291.333	0.0114416		5	25.3333	305	0.0830601		5	7.66667	276.333	0.0277443			5	0	240.333	0		5	0.333333	263	0.00126743		5	1.66667	223.667	0.00745156
	6	4.66667	142.667	0.0327103		6	10.3333	140.667	0.0734597		6	3.66667	123	0.0298103			6	1	138.667	0.00721154		6	2.66667	164	0.0162602		6	2.66667	114.333	0.0233236
	Total	1010.67	1775	0.56939		Total	981.667	1777.33	0.552326		Total	862.333	1597	0.539971			Total	495	1398.33	0.353993		Total	502.667	1451	0.346428		Total	426.333	1238	0.344373
	315T			Average 315T		ctrl			Average ctrl
	bins	sox5	dapi	sox5/DAPI		bins	sox5	dapi	sox5/DAPI
	1	210.222	310.111	0.677893		1	163.222	237.111	0.688379
	2	300.333	330	0.910101		2	181	252.556	0.716674
	3	267.222	329	0.812226		3	115.111	249.333	0.461676
	4	155.444	321	0.484251		4	12.5556	242.111	0.0518587
	5	12.1111	290.889	0.0416348		5	0.666667	242.333	0.00275103
	6	6.22222	135.444	0.0459393		6	2.11111	139	0.0151878
	Total	951.556	1716.44	0.554376		Total	474.667	1362.44	0.348393
	Average ctrl	Average 315T
	sox5/DAPI ctrl	sox5/DAPI 315T
	0.688379	0.677893
	0.716674	0.910101
	0.461676	0.812226
	0.0518587	0.484251
	0.00275103	0.0416348
	0.0151878	0.0459393
	0.348393	0.554376
	Ctrl N1	Ctrl N2	Ctrl N3		315T N1	315T N2	315T N3		Error ctrl	Error 315T	T-test
	sox5/DAPI	sox5/DAPI	sox5/DAPI		sox5/DAPI	sox5/DAPI	sox5/DAPI		sox5/DAPI	sox5/DAPI	sox5/DAPI
	0.650386	0.734057	0.681745		0.831758	0.641569	0.51519		0.024405	0.0920021	0.799085
	0.730914	0.804054	0.613079		0.990431	0.897233	0.832421		0.0556307	0.0458582	0.0572912
	0.444586	0.440847	0.507622		0.770558	0.814244	0.853789		0.0216621	0.0240364	0.000421323	***
	0.0617816	0.0113636	0.0882779		0.357219	0.478521	0.6149		0.0225583	0.0744285	0.00523945	**
	0	0.00126743	0.00745156		0.0114416	0.0830601	0.0277443		0.00230188	0.0216728	0.157517
	0.00721154	0.0162602	0.0233236		0.0327103	0.0734597	0.0298103		0.00466291	0.0140914	0.115736
	0.353993	0.346428	0.344373		0.56939	0.552326	0.539971		0.00292501	0.0085287	2.18964e-05	***

## Sheet: rorb
	315T N2																Ctrl N1
	sa1					sa2					sa3						sa1					sa2					sa3
	bins	Rorb	dapi	rorb dapi		bins	Rorb	dapi	rorb dapi		bins	Rorb	dapi	rorb dapi			bins	Rorb	dapi	rorb dapi		bins	rorb	dapi	rorb dapi		bins	rorb	dapi	rorb dapi
	1	6	349	0.017192		1	2	357	0.00560224		1	4	340	0.0117647			1	15	210	0.0714286		1	15	185	0.0810811		1	27	244	0.110656
	2	4	323	0.0123839		2	5	383	0.0130548		2	6	349	0.017192			2	35	223	0.156951		2	41	170	0.241176		2	30	241	0.124481
	3	69	303	0.227723		3	51	349	0.146132		3	38	354	0.107345			3	98	208	0.471154		3	128	180	0.711111		3	127	274	0.463504
	4	195	287	0.679443		4	174	341	0.510264		4	154	354	0.435028			4	158	237	0.666667		4	156	194	0.804124		4	160	254	0.629921
	5	101	272	0.371324		5	121	346	0.349711		5	116	318	0.36478			5	49	252	0.194444		5	54	187	0.28877		5	47	257	0.182879
	6	3	167	0.0179641		6	5	168	0.0297619		6	0	171	0			6	6	134	0.0447761		6	8	103	0.0776699		6	16	167	0.0958084
	Total	378	1701	0.222222		Total	358	1944	0.184156		Total	318	1886	0.168611			Total	361	1264	0.285601		Total	402	1019	0.394504		Total	407	1437	0.283229
	sa1					sa2					sa3						sa1					sa2					sa3
	315T N2																Ctrl N2
	bins	Rorb	dapi	rorb dapi		bins	Rorb	dapi	rorb dapi		bins	Rorb	dapi	rorb dapi			bins	Rorb	dapi	rorb dapi		bins	Rorb	dapi	rorb dapi		bins	Rorb	dapi	rorb dapi
	1	10	283	0.0353357		1	0	318	0		1	5	286	0.0174825			1	28	206	0.135922		1	26	216	0.12037		1	26	197	0.13198
	2	3	334	0.00898204		2	4	311	0.0128617		2	4	307	0.0130293			2	45	287	0.156794		2	70	259	0.27027		2	51	188	0.271277
	3	16	320	0.05		3	29	337	0.0860534		3	51	327	0.155963			3	99	199	0.497487		3	118	245	0.481633		3	87	212	0.410377
	4	144	298	0.483221		4	188	307	0.612378		4	180	324	0.555556			4	157	217	0.723502		4	110	278	0.395683		4	140	196	0.714286
	5	61	320	0.190625		5	60	279	0.215054		5	60	313	0.191693			5	69	219	0.315068		5	32	224	0.142857		5	50	228	0.219298
	6	0	138	0		6	0	125	0		6	2	158	0.0126582			6	15	113	0.132743		6	9	107	0.0841121		6	14	123	0.113821
	Total	234	1693	0.138216		Total	281	1677	0.167561		Total	302	1715	0.176093			Total	413	1241	0.332796		Total	365	1329	0.274643		Total	368	1144	0.321678
	sa1					sa2					sa3						sa1					sa2					sa3
	315T N3																Ctrl N3
	bins	Rorb	dapi	rorb dapi		bins	Rorb	dapi	rorb dapi		bins	Rorb	dapi	rorb dapi			bins	Rorb	dapi	rorb dapi		bins	rorb	dapi	rorb dapi		bins	Rorb	dapi	rorb dapi
	1	2	278	0.00719424		1	4	342	0.0116959		1	2	288	0.00694444			1	24	227	0.105727		1	44	202	0.217822		1			#DIV/0!
	2	4	286	0.013986		2	2	381	0.00524934		2	0	297	0			2	24	207	0.115942		2	53	191	0.277487		2			#DIV/0!
	3	26	284	0.0915493		3	52	355	0.146479		3	44	288	0.152778			3	121	245	0.493878		3	91	194	0.469072		3			#DIV/0!
	4	157	305	0.514754		4	167	340	0.491176		4	154	278	0.553957			4	163	228	0.714912		4	113	182	0.620879		4			#DIV/0!
	5	91	248	0.366935		5	135	323	0.417957		5	90	280	0.321429			5	41	212	0.193396		5	21	177	0.118644		5			#DIV/0!
	6	1	141	0.0070922		6	0	137	0		6	2	130	0.0153846			6	3	153	0.0196078		6	5	107	0.046729		6			#DIV/0!
	Total	281	1542	0.182231		Total	360	1878	0.191693		Total	292	1561	0.18706			Total	376	1272	0.295597		Total	327	1053	0.310541		Total	0	0	#DIV/0!
Average	315T N1					315T N2					315T N3						Average ctl1					average ctrl2					average ctrl3
	bins	rorb	dapi	rorb/DAPI		bins	rorb	dapi	rorb/DAPI		bins	rorb	dapi	rorb/DAPI			bins	rorb	dapi	rorb/DAPI		bins	rorb	dapi	rorb/DAPI		bins	rorb	dapi	rorb/DAPI
	1	4	348.667	0.0114723		1	5	295.667	0.0169109		1	2.66667	302.667	0.00881057			1	19	213	0.0892019		1	26.6667	206.333	0.129241		1	34	214.5	0.158508
	2	5	351.667	0.014218		2	3.66667	317.333	0.0115546		2	2	321.333	0.00622407			2	35.3333	211.333	0.167192		2	55.3333	244.667	0.226158		2	38.5	199	0.193467
	3	52.6667	335.333	0.157058		3	32	328	0.097561		3	40.6667	309	0.131607			3	117.667	220.667	0.533233		3	101.333	218.667	0.463415		3	106	219.5	0.482916
	4	174.333	327.333	0.532587		4	170.667	309.667	0.55113		4	159.333	307.667	0.517876			4	158	228.333	0.691971		4	135.667	230.333	0.589001		4	138	205	0.673171
	5	112.667	312	0.361111		5	60.3333	304	0.198465		5	105.333	283.667	0.371328			5	50	232	0.215517		5	50.3333	223.667	0.225037		5	31	194.5	0.159383
	6	2.66667	168.667	0.0158103		6	0.666667	140.333	0.00475059		6	1	136	0.00735294			6	10	134.667	0.0742574		6	12.6667	114.333	0.110787		6	4	130	0.0307692
	Total	351.333	1843.67	0.190562		Total	272.333	1695	0.160669		Total	311	1660.33	0.187312			Total	390	1240	0.314516		Total	382	1238	0.308562		Total	351.5	1162.5	0.302366
	315T			Average 315T		ctrl			Average ctrl
	bins	rorb	dapi	rorb/DAPI		bins	rorb	dapi	rorb/DAPI
	1	3.88889	315.667	0.0123196		1	26.5556	211.278	0.12569
	2	3.55556	330.111	0.0107708		2	43.0556	218.333	0.197201
	3	41.7778	324.111	0.1289		3	108.333	219.611	0.493296
	4	168.111	314.889	0.533874		4	143.889	221.222	0.650427
	5	92.7778	299.889	0.309374		5	43.7778	216.722	0.201999
	6	1.44444	148.333	0.00973783		6	8.88889	126.333	0.0703606
	Total	311.556	1733	0.179778		Total	374.5	1213.5	0.308611
	Average ctrl	Average 315T
	rorb/DAPI ctrl	rorb/DAPI
	0.12569	0.0123196
	0.197201	0.0107708
	0.493296	0.1289
	0.650427	0.533874
	0.201999	0.309374
	0.0703606	0.00973783
	0.308611	0.179778
	Ctrl N1	Ctrl N2	Ctrl N3		315T N1	315T N2	315T N3		Error ctrl	Error 315T	T-test
	rorb/DAPI	rorb/DAPI	rorb/DAPI		rorb/DAPI	rorb/DAPI	rorb/DAPI		rorb/DAPI	rorb/DAPI	rorb/DAPI
	0.0892019	0.129241	0.158508		0.0114723	0.0169109	0.00881057		0.0200874	0.00238374	0.00499634	**
	0.167192	0.226158	0.193467		0.014218	0.0115546	0.00622407		0.0170555	0.00235008	0.000425727	***
	0.533233	0.463415	0.482916		0.157058	0.097561	0.131607		0.0207988	0.0172349	0.000174617	***
	0.691971	0.589001	0.673171		0.532587	0.55113	0.517876		0.0316584	0.00962077	0.0237636	*
	0.215517	0.225037	0.159383		0.361111	0.198465	0.371328		0.0204833	0.0559959	0.137946
	0.0742574	0.110787	0.0307692		0.0158103	0.00475059	0.00735294		0.0231283	0.00333846	0.0552111
	0.314516	0.308562	0.302366		0.190562	0.160669	0.187312		0.00350779	0.00946941	0.000216606	***

## Sheet: Tbr1 ctip2
	315T N1	sa1						sa2							sa3							ctrl	N1
	bins	Tbr1	Ctip2	DAPI	Tbr1/DAPI	Ctip2/DAPI		bins	Tbr1	Ctip2	DAPI	Tbr1/DAPI	Ctip2/DAPI		bins	Tbr1	Ctip2	DAPI	Tbr1/DAPI	Ctip2/DAPI			bins	tbr1	ctip2	dapi	tbr1/DAPI	ctip2/DAPI		bins	tbr1	ctip2	dapi	tbr1/DAPI	ctip2/DAPI		bins	tbr1	ctip2	dapi	tbr1/DAPI	ctip2/DAPI
	1	187	33	309	0.605178	0.106796		1	201	28	359	0.559889	0.0779944		1	195	93	370	0.527027	0.251351			1	158	10	247	0.639676	0.0404858		1	167	10	218	0.766055	0.0458716		1	179	5	217	0.824885	0.0230415
	2	233	5	317	0.735016	0.0157729		2	230	11	303	0.759076	0.0363036		2	252	26	328	0.768293	0.0792683			2	195	4	242	0.805785	0.0165289		2	172	2	209	0.822967	0.00956938		2	191	0	211	0.905213	0
	3	112	69	295	0.379661	0.233898		3	154	84	312	0.49359	0.269231		3	174	86	323	0.5387	0.266254			3	60	78	272	0.220588	0.286765		3	102	78	235	0.434043	0.331915		3	110	67	239	0.460251	0.280335
	4	2	105	277	0.00722022	0.379061		4	15	74	310	0.0483871	0.23871		4	3	101	321	0.00934579	0.314642			4	2	35	251	0.00796813	0.139442		4	31	31	241	0.128631	0.128631		4	7	26	227	0.030837	0.114537
	5	1	2	313	0.00319489	0.00638978		5	11	0	266	0.0413534	0		5	12	3	288	0.0416667	0.0104167			5	1	0	239	0.0041841	0		5	13	0	209	0.062201	0		5	2	0	235	0.00851064	0
	6	9	0	258	0.0348837	0		6	19	0	147	0.129252	0		6	5	0	160	0.03125	0			6	1	0	136	0.00735294	0		6	8	0	78	0.102564	0		6	0	0	175	0	0
	Total	544	214	1769	0.307518	0.120972		Total	630	197	1697	0.371243	0.116087		Total	641	309	1790	0.358101	0.172626			Total	417	127	1387	0.300649	0.0915645		Total	493	121	1190	0.414286	0.101681		Total	489	98	1304	0.375	0.0751534
	315TN2	sa1						sa2							sa3							ctrl	N2
	bins	Tbr1	Ctip2	DAPI	Tbr1/DAPI	Ctip2/DAPI		bins	Tbr1	Ctip2	DAPI	Tbr1/DAPI	Ctip2/DAPI		bins	Tbr1	Ctip2	DAPI	Tbr1/DAPI	Ctip2/DAPI			bins	tbr1	ctip2	dapi	tbr1/DAPI	ctip2/DAPI		bins	tbr1	ctip2	dapi	tbr1/DAPI	ctip2/DAPI		bins	tbr1	ctip2	dapi	tbr1/DAPI	ctip2/DAPI
	1	174	49	290	0.6	0.168966		1	190	115	343	0.553936	0.335277		1	203	59	306	0.663399	0.19281			1	137	5	183	0.748634	0.0273224		1	141	5	191	0.73822	0.026178		1	140	7	193	0.725389	0.0362694
	2	236	14	284	0.830986	0.0492958		2	210	61	354	0.59322	0.172316		2	225	30	337	0.667656	0.0890208			2	157	6	185	0.848649	0.0324324		2	144	5	186	0.774194	0.0268817		2	147	5	193	0.761658	0.0259067
	3	141	72	291	0.484536	0.247423		3	184	57	348	0.528736	0.163793		3	175	71	321	0.545171	0.221184			3	91	75	190	0.478947	0.394737		3	89	60	196	0.454082	0.306122		3	75	73	201	0.373134	0.363184
	4	27	92	290	0.0931034	0.317241		4	3	99	296	0.0101351	0.334459		4	20	82	319	0.0626959	0.257053			4	16	18	216	0.0740741	0.0833333		4	18	18	198	0.0909091	0.0909091		4	3	23	204	0.0147059	0.112745
	5	4	0	281	0.0142349	0		5	0	3	323	0	0.00928793		5	14	4	289	0.0484429	0.0138408			5	23	1	244	0.0942623	0.00409836		5	12	3	198	0.0606061	0.0151515		5	6	4	202	0.029703	0.019802
	6	5	0	132	0.0378788	0		6	0	2	157	0	0.0127389		6	11	3	168	0.0654762	0.0178571			6	8	1	101	0.0792079	0.00990099		6	9	0	119	0.0756303	0		6	4	1	96	0.0416667	0.0104167
	Total	587	227	1568	0.374362	0.14477		Total	587	337	1821	0.32235	0.185063		Total	648	249	1740	0.372414	0.143103			Total	432	106	1119	0.386059	0.0947274		Total	413	91	1088	0.379596	0.0836397		Total	375	113	1089	0.344353	0.103765
	315TN3	sa1						sa2							sa3							ctrl	N3
	bins	Tbr1	Ctip2	DAPI	Tbr1/DAPI	Ctip2/DAPI		bins	Tbr1	Ctip2	DAPI	Tbr1/DAPI	Ctip2/DAPI		bins	Tbr1	Ctip2	DAPI	Tbr1/DAPI	Ctip2/DAPI			bins	tbr1	ctip2	dapi	tbr1/DAPI	ctip2/DAPI		bins	tbr1	ctip2	dapi	tbr1/DAPI	ctip2/DAPI		bins	tbr1	ctip2	dapi	tbr1/DAPI	ctip2/DAPI
	1	140	25	294	0.47619	0.085034		1	129	36	254	0.507874	0.141732		1	189	28	317	0.596215	0.0883281			1	195	3	275	0.709091	0.0109091		1	152	22	300	0.506667	0.0733333		1	147	6	254	0.57874	0.023622
	2	213	27	330	0.645455	0.0818182		2	174	35	286	0.608392	0.122378		2	230	6	354	0.649718	0.0169492			2	245	4	286	0.856643	0.013986		2	176	6	329	0.534954	0.0182371		2	157	2	233	0.67382	0.00858369
	3	235	46	361	0.65097	0.127424		3	194	46	282	0.687943	0.163121		3	170	70	352	0.482955	0.198864			3	134	68	253	0.529644	0.268775		3	150	41	306	0.490196	0.133987		3	91	62	187	0.486631	0.331551
	4	57	135	317	0.179811	0.425868		4	47	95	301	0.156146	0.315615		4	6	90	328	0.0182927	0.27439			4	0	23	241	0	0.0954357		4	1	67	283	0.00353357	0.236749		4	1	45	218	0.00458716	0.206422
	5	59	9	262	0.225191	0.0343511		5	37	6	237	0.156118	0.0253165		5	1	1	322	0.00310559	0.00310559			5	0	0	274	0	0		5	0	0	308	0	0		5	0	0	215	0	0
	6	12	0	100	0.12	0		6	28	0	111	0.252252	0		6	0	1	213	0	0.00469484			6	8	0	158	0.0506329	0		6	0	0	171	0	0		6	0	0	127	0	0
	Total	716	242	1664	0.430288	0.145433		Total	609	218	1471	0.414004	0.148199		Total	596	196	1886	0.316013	0.103924			Total	582	98	1487	0.391392	0.0659045		Total	479	136	1697	0.282263	0.0801414		Total	396	115	1234	0.320908	0.0931929
	average 315T N1							average 315T N2							average 315T N3								average ctrl1							average ctrl2							average ctrl3
	bins	Tbr1	Ctip2	DAPI	Tbr1/DAPI	Ctip2/DAPI		bins	Tbr1	Ctip2	DAPI	Tbr1/DAPI	Ctip2/DAPI		bins	Tbr1	Ctip2	DAPI	Tbr1/DAPI	Ctip2/DAPI			bins	Tbr1	Ctip2	DAPI	Tbr1/DAPI	Ctip2/DAPI		bins	Tbr1	Ctip2	DAPI	Tbr1/DAPI	Ctip2/DAPI		bins	Tbr1	Ctip2	DAPI	Tbr1/DAPI	Ctip2/DAPI
	1	194.333	51.3333	346	0.561657	0.148362		1	189	74.3333	313	0.603834	0.237487		1	152.667	29.6667	288.333	0.52948	0.10289			1	168	8.33333	227.333	0.739003	0.0366569		1	139.333	5.66667	189	0.737213	0.0299824		1	164.667	10.3333	276.333	0.595899	0.0373945
	2	238.333	14	316	0.754219	0.0443038		2	223.667	35	325	0.688205	0.107692		2	205.667	22.6667	323.333	0.636082	0.0701031			2	186	2	220.667	0.8429	0.00906344		2	149.333	5.33333	188	0.794326	0.0283688		2	192.667	4	282.667	0.681604	0.0141509
	3	146.667	79.6667	310	0.473118	0.256989		3	166.667	66.6667	320	0.520833	0.208333		3	199.667	54	331.667	0.60201	0.162814			3	90.6667	74.3333	248.667	0.364611	0.298928		3	85	69.3333	195.667	0.434412	0.354344		3	125	57	248.667	0.502681	0.229223
	4	6.66667	93.3333	302.667	0.0220264	0.30837		4	16.6667	91	301.667	0.0552486	0.301657		4	36.6667	106.667	315.333	0.116279	0.338266			4	13.3333	30.6667	239.667	0.0556328	0.127955		4	12.3333	19.6667	206	0.0598706	0.0954693		4	0.666667	45	247.333	0.00269542	0.181941
	5	8	1.66667	289	0.0276817	0.00576701		5	6	2.33333	297.667	0.0201568	0.00783875		5	32.3333	5.33333	273.667	0.118149	0.0194884			5	5.33333	0	227.667	0.0234261	0		5	13.6667	2.66667	214.667	0.0636646	0.0124224		5	0	0	265.667	0	0
	6	11	0	188.333	0.0584071	0		6	5.33333	1.66667	152.333	0.0350109	0.0109409		6	13.3333	0.333333	141.333	0.0943396	0.00235849			6	3	0	129.667	0.0231362	0		6	7	0.666667	105.333	0.0664557	0.00632911		6	2.66667	0	152	0.0175439	0
	Total	605	240	1752	0.34532	0.136986		Total	607.333	271	1709.67	0.355235	0.15851		Total	640.333	218.667	1673.67	0.382593	0.130651			Total	466.333	115.333	1293.67	0.360474	0.0891523		Total	406.667	103.333	1098.67	0.370146	0.0940534		Total	485.667	116.333	1472.67	0.329787	0.078995
	layer V		173	612.667		0.282372		layer V		157.667	621.667		0.253619		layer V		160.667	647		0.248326			layer V		105	488.333		0.215017		layer V		89	401.667		0.221577		layer V		102	496		0.205645
	Layer VI	579.333		972	0.596022			Layer VI	579.333		958	0.604732			Layer VI	558		943.333	0.591519				Layer VI	444.667		696.667	0.638278			Layer VI	373.667		572.667	0.652503			Layer VI	482.333		807.667	0.597194
	average 315T																						average ctrl1
	bins	Tbr1	Ctip2	DAPI	Tbr1/DAPI 315T	Ctip2/DAPI 315T																	bins	Tbr1	Ctip2	DAPI	Tbr1/DAPI ctrl	Ctip2/DAPI ctrl
	1	178.667	51.7778	315.778	0.565799	0.163969																	1	157.333	8.11111	230.889	0.681424	0.0351299
	2	222.556	23.8889	321.444	0.692361	0.0743173																	2	176	3.77778	230.444	0.763742	0.0163934
	3	171	66.7778	320.556	0.533449	0.208319																	3	100.222	66.8889	231	0.433862	0.289562
	4	20	97	306.556	0.065241	0.316419																	4	8.77778	31.7778	231	0.037999	0.137566
	5	15.4444	3.11111	286.778	0.0538551	0.0108485																	5	6.33333	0.888889	236	0.0268362	0.00376648
	6	9.88889	0.666667	160.667	0.0615491	0.00414938																	6	4.22222	0.222222	129	0.0327304	0.00172265
	Total	617.556	243.222	1711.78	0.360769	0.142087																	Total	452.889	111.667	1288.33	0.351531	0.0866753
	layer V		163.778	627.111		0.261162																	layer V		98.6667	462		0.213564
	Layer VI	572.222		957.778	0.597448																		Layer VI	433.556		692.333	0.626224													layer V
																																	total
	average ctrl1	average ctrl2	average ctrl3		average 315T1	average 315T2	average 315T3		Error ctrl	Error 315T	T-test		bins	Ctip2/DAPI ctrl	Ctip2/DAPI 315T
bins	Ctip2/DAPI	Ctip2/DAPI	Ctip2/DAPI		Ctip2/DAPI	Ctip2/DAPI	Ctip2/DAPI		Ctip2/DAPI	Ctip2/DAPI	Ctip2/DAPI		1	0.0351299	0.163969
1	0.0366569	0.0299824	0.0373945		0.148362	0.237487	0.10289		0.0023574	0.0395299	0.0317266	*	2	0.0163934	0.0743173
2	0.00906344	0.0283688	0.0141509		0.0443038	0.107692	0.0701031		0.005777	0.0184039	0.0421097	*	3	0.289562	0.208319
3	0.298928	0.354344	0.229223		0.256989	0.208333	0.162814		0.0361979	0.0271911	0.1344		4	0.137566	0.316419
4	0.127955	0.0954693	0.181941		0.30837	0.301657	0.338266		0.025218	0.0112523	0.00280313	**	5	0.00376648	0.0108485
5	0	0.0124224	0		0.00576701	0.00783875	0.0194884		0.00414079	0.0042706	0.311156		6	0.00172265	0.00414938
6	0	0.00632911	0		0	0.0109409	0.00235849		0.0021097	0.00332436	0.586841		Total	0.0866753	0.142087
Total	0.0891523	0.0940534	0.078995		0.136986	0.15851	0.130651		0.00443437	0.00843127	0.00457388	**	layer V	0.213564	0.261162
layer V	0.215017	0.221577	0.205645		0.282372	0.253619	0.248326		0.00462288	0.0105775	0.014821	**
													bins	Tbr1/DAPI ctrl	Tbr1/DAPI 315T
bins	Tbr1/DAPI	Tbr1/DAPI	Tbr1/DAPI		Tbr1/DAPI	Tbr1/DAPI	Tbr1/DAPI		Tbr1/DAPI	Tbr1/DAPI	Tbr1/DAPI		1	0.681424	0.565799
1	0.739003	0.737213	0.595899		0.561657	0.603834	0.52948		0.047406	0.0215288	0.0731933		2	0.763742	0.692361
2	0.8429	0.794326	0.681604		0.754219	0.688205	0.636082		0.047774	0.0341817	0.244364		3	0.433862	0.533449
3	0.364611	0.434412	0.502681		0.473118	0.520833	0.60201		0.0398581	0.0376235	0.14803		4	0.037999	0.065241
4	0.0556328	0.0598706	0.00269542		0.0220264	0.0552486	0.116279		0.0183928	0.0276003	0.491018		5	0.0268362	0.0538551																		total							layer VI
5	0.0234261	0.0636646	0		0.0276817	0.0201568	0.118149		0.0185908	0.0314848	0.511762		6	0.0327304	0.0615491
6	0.0231362	0.0664557	0.0175439		0.0584071	0.0350109	0.0943396		0.0154564	0.0172537	0.310519		Total	0.351531	0.360769
Total	0.360474	0.370146	0.329787		0.34532	0.355235	0.382593		0.0121656	0.0111457	0.669788
layer VI	0.638278	0.652503	0.597194		0.596022	0.604732	0.591519		0.0165821	0.00387809	0.134329		layer VI	0.626224	0.597448

## Sheet: cux1
	315T N1																Ctrl N1
	Bins	DAPI	Cux1	Cux1/DAPI		Bins	DAPI	Cux1	Cux1/DAPI		Bins	DAPI	Cux1	Cux1/DAPI			Bins	DAPI	Cux1	Cux1/DAPI		Bins	DAPI	Cux1	Cux1/DAPI		Bins	DAPI	Cux1	Cux1/DAPI
	1	276	59	0.213768		1	290	71	0.244828		1	247	57	0.230769			1	245	75	0.306122		1	237	41	0.172996		1	253	46	0.181818
	2	285	54	0.189474		2	279	62	0.222222		2	283	86	0.303887			2	258	67	0.25969		2	205	48	0.234146		2	234	83	0.354701
	3	299	97	0.324415		3	248	106	0.427419		3	272	118	0.433824			3	244	110	0.45082		3	237	57	0.240506		3	252	90	0.357143
	4	287	221	0.770035		4	260	208	0.8		4	279	204	0.731183			4	233	230	0.987124		4	221	181	0.819005		4	248	212	0.854839
	5	290	305	1.05172		5	269	258	0.959108		5	251	280	1.11554			5	238	245	1.02941		5	241	205	0.850622		5	246	215	0.873984
	6	135	135	1		6	116	64	0.551724		6	143	143	1			6	103	76	0.737864		6	116	116	1		6	60	52	0.866667
	Total	1572	871	0.554071		Total	1462	769	0.525992		Total	1475	888	0.602034			Total	1321	803	0.607873		Total	1257	648	0.515513		Total	1293	698	0.53983
	315 N2																Ctrl N2
	Bins	DAPI	Cux1	Cux1/DAPI		Bins	DAPI	Cux1	Cux1/DAPI		Bins	DAPI	Cux1	Cux1/DAPI			Bins	DAPI	Cux1	Cux1/DAPI		Bins	DAPI	Cux1	Cux1/DAPI		Bins	DAPI	Cux1	Cux1/DAPI
	1	285	39	0.136842		1	281	55	0.19573		1	254	42	0.165354			1	253	46	0.181818		1	222	29	0.130631		1	264	35	0.132576
	2	284	47	0.165493		2	262	71	0.270992		2	264	61	0.231061			2	234	83	0.354701		2	238	32	0.134454		2	251	39	0.155378
	3	256	96	0.375		3	264	102	0.386364		3	267	90	0.337079			3	252	90	0.357143		3	228	33	0.144737		3	257	27	0.105058
	4	260	171	0.657692		4	247	181	0.732794		4	264	231	0.875			4	248	212	0.854839		4	247	169	0.684211		4	268	207	0.772388
	5	231	231	1		5	217	217	1		5	221	281	1.27149			5	246	215	0.873984		5	254	223	0.877953		5	265	261	0.984906
	6	113	113	1		6	128	78	0.609375		6	127	120	0.944882			6	60	52	0.866667		6	98	84	0.857143		6	145	86	0.593103
	Total	1429	697	0.487754		Total	1399	704	0.503217		Total	1397	825	0.590551			Total	1293	698	0.53983		Total	1287	570	0.44289		Total	1450	655	0.451724
	315T N3																Ctrl N3
	Bins	DAPI	Cux1	Cux1/DAPI		Bins	DAPI	Cux1	Cux1/DAPI		Bins	DAPI	Cux1	Cux1/DAPI			Bins	DAPI	Cux1	Cux1/DAPI		Bins	DAPI	Cux1	Cux1/DAPI		Bins	DAPI	Cux1	Cux1/DAPI
	1	326	128	0.392638		1	347	76	0.21902		1	276	69	0.25			1	288	31	0.107639		1	174	51	0.293103		1			#DIV/0!
	2	306	156	0.509804		2	337	71	0.210682		2	285	95	0.333333			2	289	45	0.155709		2	173	51	0.294798		2			#DIV/0!
	3	270	140	0.518519		3	327	80	0.244648		3	230	137	0.595652			3	308	35	0.113636		3	179	49	0.273743		3			#DIV/0!
	4	285	176	0.617544		4	316	159	0.503165		4	245	176	0.718367			4	304	227	0.746711		4	187	128	0.684492		4			#DIV/0!
	5	300	260	0.866667		5	319	282	0.884013		5	244	248	1.01639			5	273	266	0.974359		5	177	181	1.0226		5			#DIV/0!
	6	190	123	0.647368		6	187	151	0.807487		6	145	129	0.889655			6	88	73	0.829545		6	95	145	1.52632		6			#DIV/0!
	Total	1677	983	0.586166		Total	1833	819	0.446809		Total	1425	854	0.599298			Total	1550	677	0.436774		Total	985	605	0.614213		Total	0	0	#DIV/0!
Average	315T N1					315T N2					315T N3						Average ctl1					average ctrl2					average ctrl3
	bins	DAPI	cux1	cux1/DAPI		bins	DAPI	cux1	cux1/DAPI		bins	DAPI	cux1	cux1/DAPI			bins	DAPI	cux1	cux1/DAPI		bins	DAPI	cux1	cux1/DAPI		bins	DAPI	cux1	cux1/DAPI
	1	271	62.3333	0.230012		1	273.333	45.3333	0.165854		1	316.333	91	0.287671			1	245	54	0.220408		1	246.333	36.6667	0.14885		1	231	41	0.177489
	2	282.333	67.3333	0.238489		2	270	59.6667	0.220988		2	309.333	107.333	0.346983			2	232.333	66	0.284075		2	241	51.3333	0.213001		2	231	48	0.207792
	3	273	107	0.391941		3	262.333	96	0.365947		3	275.667	119	0.431681			3	244.333	85.6667	0.350614		3	245.667	50	0.203528		3	243.5	42	0.172485
	4	275.333	211	0.766344		4	257	194.333	0.756161		4	282	170.333	0.604019			4	234	207.667	0.887464		4	254.333	196	0.770642		4	245.5	177.5	0.723014
	5	270	281	1.04074		5	223	243	1.08969		5	287.667	263.333	0.915411			5	241.667	221.667	0.917241		5	255	233	0.913725		5	225	223.5	0.993333
	6	131.333	114	0.86802		6	122.667	103.667	0.845109		6	174	134.333	0.772031			6	93	81.3333	0.874552		6	101	74	0.732673		6	91.5	109	1.19126
	Total	1503	842.667	0.560656		Total	1408.33	742	0.526864		Total	1645	885.333	0.538197			Total	1290.33	716.333	0.555154		Total	1343.33	641	0.477171		Total	1267.5	641	0.50572
	UL	676.667	606	0.895567		UL	602.667	541	0.897677		UL	743.667	568	0.763783			UL	568.667	510.667	0.898007		UL	610.333	503	0.82414		UL	562	510	0.907473
	315T			Average 315T		ctrl			Average ctrl
	bins	DAPI	cux1	cux1/DAPI		bins	DAPI	cux1	cux1/DAPI
	1	286.889	66.2222	0.230829		1	240.778	43.8889	0.18228
	2	287.222	78.1111	0.271954		2	234.778	55.1111	0.234737
	3	270.333	107.333	0.397041		3	244.5	59.2222	0.242218
	4	271.444	191.889	0.706918		4	244.611	193.722	0.79196
	5	260.222	262.444	1.00854		5	240.556	226.056	0.939723
	6	142.667	117.333	0.82243		6	95.1667	88.1111	0.925861
	Total	1518.78	823.333	0.542103		Total	1300.39	666.111	0.51224
	UL	674.333	571.667	0.847751		UL	580.333	507.889	0.875168																		Total
	Average ctrl	Average 315T
	cux1/DAPI ctrl	cux1/DAPI 315T
1	0.18228	0.230829
2	0.234737	0.271954
3	0.242218	0.397041
4	0.79196	0.706918
5	0.939723	1.00854
6	0.925861	0.82243
Total	0.51224	0.542103
UL	0.875168	0.847751
	Ctrl 1	Ctrl2	CTrl 3		315T N1	315T N2	315T N3		Error ctrl	Error 315T	T-test
	cux1/DAPI	cux1/DAPI	cux1/DAPI		cux1/DAPI	cux1/DAPI	cux1/DAPI		cux1/DAPI	cux1/DAPI	cux1/DAPI
1	0.220408	0.14885	0.177489		0.230012	0.165854	0.287671		0.0207938	0.0351824	0.327048
2	0.284075	0.213001	0.207792		0.238489	0.220988	0.346983		0.0246053	0.0394067	0.506438
3	0.350614	0.203528	0.172485		0.391941	0.365947	0.431681		0.0549384	0.0191136	0.0568102
4	0.887464	0.770642	0.723014		0.766344	0.756161	0.604019		0.0488533	0.0524935	0.302152
5	0.917241	0.913725	0.993333		1.04074	1.08969	0.915411		0.0259698	0.0518945	0.272117
6	0.874552	0.732673	1.19126		0.86802	0.845109	0.772031		0.13555	0.0289438	0.493069									UL
Total	0.555154	0.477171	0.50572		0.560656	0.526864	0.538197		0.0227791	0.00992979	0.30479
UL	0.898007	0.82414	0.907473		0.895567	0.897677	0.763783		0.0263422	0.0442838	0.663083

## Sheet: daPI
																																315 T N1				315 T N2				315TN3				315 T N4				315TN5
Ctrl 1				Ctrl 2				Ctrl 3				Ctrl 4				Ctrl 5					Ctrl 6				Ctrl 7							dapi				dapi				dapi				dapi				dapi
	dapi				dapi				dapi				dapi				dapi									dapi					sa3	sa2	sa3		sa1	sa2	sa3		sa1	sa2	sa3		sa3	sa2	sa3		sa1	sa2	sa3
sa3	sa2	sa3		sa1	sa2	sa3		sa1	sa2	sa3		sa1	sa2	sa3		sa1	sa2	sa3			sa1	sa2	sa3		sa1	sa2	sa3				386	349	323		338	311	294		295	257	238		349	357	340		278	342	288
306	262	249		281	254	236		333	373	321		303	306	314		281	347	347			271	316	285		305	302	273				395	329	321		333	348	331		323	311	279		323	383	349		286	381	297
289	272	227		318	266	282		384	410	340		288	321	351		297	331	361			252	312	282		299	301	270				368	339	278		346	350	343		344	303	290		303	349	354		284	355	288
289	242	235		290	260	261		374	378	322		286	338	306		286	343	339			248	306	290		316	333	297				370	323	242		346	326	329		347	312	294		287	341	354		305	340	278
276	259	218		297	270	271		361	358	325		280	318	290		273	314	333			237	274	283		303	312	278				347	263	264		313	300	302		278	281	270		272	346	318		248	323	280
241	252	212		277	232	215		297	329	323		235	279	281		287	327	306			226	288	273		297	300	271				143	110	175		136	147	139		137	126	106		167	168	171		141	137	130
138	156	102		143	140	94		135	149	128		159	174	174		159	142	198			147	115	180		193	204	198				2009	1713	1603		1812	1782	1738		1724	1590	1477		1701	1944	1886		1542	1878	1561
1539	1443	1243		1606	1422	1359		1884	1997	1759		1551	1736	1716		1583	1804	1884			1381	1611	1593		1713	1752	1587
																															average 315T N1				average 315T N2				average 315T N3				average 315T N4				average 315T N5
average ctrl N1				average ctrl N2				average ctrl N3				average ctrl N4				average Ctrl N5					average Ctrl N6				average Ctrl N7						352.667				314.333				263.333				348.667				302.667
272.333				257				342.333				307.667				325					290.667				293.333						348.333				337.333				304.333				351.667				321.333
262.667				288.667				378				320				329.667					282				290						328.333				346.333				312.333				335.333				309
255.333				270.333				358				310				322.667					281.333				315.333						311.667				333.667				317.667				327.333				307.667
251				279.333				348				296				306.667					264.667				297.667						291.333				305				276.333				312				283.667
235				241.333				316.333				265				306.667					262.333				289.333						142.667				140.667				123				168.667				136
132				125.667				137.333				169				166.333					147.333				198.333						1775				1777.33				1597				1843.67				1660.33
1408.33				1462.33				1880				1667.67				1757					1528.33				1684
	average ctrl N1	average ctrl N2	average ctrl N3	average ctrl N4	average Ctrl N5	average Ctrl N6	average Ctrl N7		average 315T N1	average 315T N2	average 315T N3	average 315T N4	average 315T N5	average 315T N6	average 315T N7	average 315T N8	average 315T N9
	DAPI	DAPI	DAPI	dapi	dapi	dapi	dapi		dapi	dapi	dapi	dapi	dapi	DAPI	DAPI	DAPI	DAPI
	272.333	257	342.333	307.667	325	290.667	293.333		352.667	314.333	263.333	348.667	302.667	346	271	273.333	316.333
	262.667	288.667	378	320	329.667	282	290		348.333	337.333	304.333	351.667	321.333	316	282.333	270	309.333
	255.333	270.333	358	310	322.667	281.333	315.333		328.333	346.333	312.333	335.333	309	310	273	262.333	275.667
	251	279.333	348	296	306.667	264.667	297.667		311.667	333.667	317.667	327.333	307.667	302.667	275.333	257	282
	235	241.333	316.333	265	306.667	262.333	289.333		291.333	305	276.333	312	283.667	289	270	223	287.667
	132	125.667	137.333	169	166.333	147.333	198.333		142.667	140.667	123	168.667	136	188.333	131.333	122.667	174
	1408.33	1462.33	1880	1667.67	1757	1528.33	1684		1775	1777.33	1597	1843.67	1660.33	1752	1503	1408.33	1645
	ctrl DAPI	315T DAPI	Error ctrl	Error 315T	T-test
	298.333	309.815	11.1296	11.6471	0.497375
	307.286	315.63	14.5886	9.30194	0.622782
	301.857	305.815	13.2848	9.83665	0.809976
	291.905	301.667	11.94	8.45832	0.503467
	273.714	282	11.8512	8.54491	0.569535
	153.714	147.481	9.69902	7.90415	0.622482
	1626.81	1662.41	63.7101	47.334	0.653389
