# Supplementary material for: Pum2 and TDP-43 refine area-specific cytoarchitecture post-mitotically and modulate translation of Sox5, Bcl11b, and Rorb mRNAs in developing mouse neocortex
Source: eLife. 2022 Mar 9;11:e55199. doi: 10.7554/eLife.55199 (PMC8906809; doi:10.7554/eLife.55199)
Supplement: Source data 3. — Quantification of results from n = 3 mice of Pum2 and TDP-43 mutants and their control littermates in the F/M for Sox5, Bcl11b, and DAPI in single bins (Figure 2b) and total (Figure 1—figure supplement 5b) and Tbr1 in single bins (Figure 1—figure supplement 6b). All markers are normalized to DAPI cells. Distribution of cells across six equal-sized bins is shown. For Bcl11b, only high-expressing neurons were counted. Data are shown as means ± standard error of the mean (SEM), n = 3 for each genotype. *p≤0.05, **p≤0.01, ***p≤0.001, two-tailed t-test. Pum2 cKO: Pum2fl/fl; Emx1Cre; II–IV, V, VI: layers II–IV, V, and VI. [file elife-55199-data3.xlsx]

## Sheet: Sox5
	MA																																					Ctrl
	Ctrl																315T
	N1	sa1					SA2					sa3					N1	sa1					SA2					sa3						ctrl N1						SA2					sa3
	Bins	Sox5	DAPI	Sox5/DAPI		Bins	Sox5	DAPI	Sox5/DAPI		Bins	Sox5	DAPI	Sox5/DAPI			Bins	Sox5	DAPI	Sox5/DAPI		Bins	Sox5	DAPI	Sox5/DAPI		Bins	Sox5	DAPI	Sox5/DAPI				bins	sox5	DAPI	Sox5/DAPI		bins	sox5	DAPI	Sox5/DAPI		bins	sox5	DAPI	Sox5/DAPI
	1	160	261	0.613027		1	194	242	0.801653		1	161	246	0.654472			1	240	306	0.784314		1	206	248	0.830645		1			#DIV/0!				1	238	339	0.702065		1	181	311	0.581994		1	237	300	0.79
	2	214	265	0.807547		2	225	242	0.929752		2	202	239	0.845188			2	248	353	0.70255		2	208	265	0.784906		2			#DIV/0!				2	328	339	0.967552		2	277	339	0.817109		2	317	314	1.00955
	3	224	273	0.820513		3	194	271	0.715867		3	211	245	0.861224			3	213	391	0.544757		3	178	285	0.624561		3			#DIV/0!				3	283	317	0.892744		3	287	301	0.953488		3	322	320	1.00625
	4	134	295	0.454237		4	146	256	0.570312		4	110	263	0.418251			4	156	378	0.412698		4	135	279	0.483871		4			#DIV/0!				4	183	299	0.61204		4	194	276	0.702899		4	172	284	0.605634
	5	24	251	0.0956175		5	21	265	0.0792453		5	15	240	0.0625			5	48	351	0.136752		5	10	269	0.0371747		5			#DIV/0!				5	19	314	0.0605096		5	16	272	0.0588235		5	6	311	0.0192926
	6	6	96	0.0625		6	8	132	0.0606061		6	10	91	0.10989			6	13	152	0.0855263		6	5	131	0.0381679		6			#DIV/0!				6	3	161	0.0186335		6	3	143	0.020979		6	0	163	0
	Total	762	1441	0.528799		Total	788	1408	0.559659		Total	709	1324	0.535498			Total	918	1931	0.475401		Total	742	1477	0.50237		Total	0	0	#DIV/0!				Total	1054	1769	0.595817		Total	958	1642	0.583435		Total	1054	1692	0.622931
	Ctrl N2																315T N2																	Ctrl N2
	Bins	Sox5	DAPI	Sox5/DAPI		Bins	Sox5	DAPI	Sox5/DAPI		Bins	Sox5	DAPI	Sox5/DAPI			Bins	Sox5	DAPI	Sox5/DAPI		Bins	Sox5	DAPI	Sox5/DAPI		Bins	Sox5	DAPI	Sox5/DAPI				bins	sox5	DAPI	Sox5/DAPI		bins	sox5	DAPI	Sox5/DAPI		bins	sox5	DAPI	Sox5/DAPI
	1	149	320	0.465625		1	159	305	0.521311		1	140	273	0.512821			1	240	305	0.786885		1	151	281	0.537367		1			#DIV/0!				1	230	400	0.575		1	192	396	0.484848		1	251	379	0.662269
	2	243	313	0.776358		2	233	336	0.693452		2	219	295	0.742373			2	195	251	0.776892		2	170	286	0.594406		2			#DIV/0!				2	337	429	0.785548		2	346	419	0.825776		2	347	379	0.915567
	3	249	315	0.790476		3	184	296	0.621622		3	212	294	0.721088			3	131	229	0.572052		3	133	269	0.494424		3			#DIV/0!				3	313	431	0.726218		3	324	413	0.784504		3	337	360	0.936111
	4	183	330	0.554545		4	97	251	0.386454		4	147	282	0.521277			4	79	231	0.341991		4	95	273	0.347985		4			#DIV/0!				4	215	395	0.544304		4	226	370	0.610811		4	253	359	0.704735
	5	42	344	0.122093		5	32	291	0.109966		5	41	283	0.144876			5	3	263	0.0114068		5	21	175	0.12		5			#DIV/0!				5	32	359	0.0891365		5	56	368	0.152174		5	49	349	0.140401
	6	13	135	0.0962963		6	0	113	0		6	6	144	0.0416667			6	4	161	0.0248447		6	3	87	0.0344828		6			#DIV/0!				6	0	218	0		6	4	166	0.0240964		6	8	123	0.0650407
	Total	879	1757	0.500285		Total	705	1592	0.442839		Total	765	1571	0.486951			Total	652	1440	0.452778		Total	573	1371	0.417943		Total	0	0	#DIV/0!				Total	1127	2232	0.504928		Total	1148	2132	0.538462		Total	1245	1949	0.638789
	Ctrl N3																315T N3																	Ctrl N3
	Bins	Sox5	DAPI	Sox5/DAPI		Bins	Sox5	DAPI	Sox5/DAPI		Bins	Sox5	DAPI	Sox5/DAPI			Bins	Sox5	DAPI	Sox5/DAPI		Bins	Sox5	DAPI	Sox5/DAPI		Bins	Sox5	DAPI	Sox5/DAPI				Bins	Sox5	DAPI	Sox5/DAPI		Bins	Sox5	DAPI	Sox5/DAPI		Bins	Sox5	DAPI	Sox5/DAPI
	1	172	301	0.571429		1	154	339	0.454277		1	185	297	0.622896			1	156	252	0.619048		1	139	237	0.586498		1			#DIV/0!				1	147	334	0.44012		1	187	296	0.631757		1	202	321	0.629283
	2	254	329	0.772036		2	204	355	0.574648		2	230	309	0.744337			2	162	260	0.623077		2	165	249	0.662651		2			#DIV/0!				2	233	362	0.643646		2	290	291	0.996564		2	270	324	0.833333
	3	224	359	0.623955		3	159	360	0.441667		3	192	348	0.551724			3	141	262	0.538168		3	154	255	0.603922		3			#DIV/0!				3	156	352	0.443182		3	234	322	0.726708		3	287	315	0.911111
	4	183	391	0.468031		4	90	343	0.262391		4	134	363	0.369146			4	112	257	0.435798		4	102	235	0.434043		4			#DIV/0!				4	121	354	0.341808		4	172	312	0.551282		4	179	311	0.575563
	5	21	319	0.0658307		5	4	293	0.0136519		5	24	349	0.0687679			5	39	245	0.159184		5	7	220	0.0318182		5			#DIV/0!				5	22	336	0.0654762		5	62	276	0.224638		5	28	272	0.102941
	6	0	149	0		6	8	133	0.0601504		6	3	198	0.0151515			6	13	127	0.102362		6	1	107	0.00934579		6			#DIV/0!				6	10	131	0.0763359		6	3	153	0.0196078		6	6	137	0.0437956
	Total	854	1848	0.462121		Total	619	1823	0.33955		Total	768	1864	0.412017			Total	623	1403	0.444048		Total	568	1303	0.435917		Total	0	0	#DIV/0!				Total	689	1869	0.368646		Total	948	1650	0.574545		Total	972	1680	0.578571
	average ctrl N1					Average ctrl N2					Average ctrl N3						average 315T N1					Average 315T N2					Average 315T N3							average ctrl N1					Average ctrl N2					Average ctrl N3
	Bins	Sox5	DAPI	Sox5/DAPI		Bins	Sox5	DAPI	Sox5/DAPI		Bins	Sox5	DAPI	Sox5/DAPI			Bins	Sox5	DAPI	Sox5/DAPI		Bins	Sox5	DAPI	Sox5/DAPI		Bins	Sox5	DAPI	Sox5/DAPI				Bins	Sox5	DAPI	Sox5/DAPI		Bins	Sox5	DAPI	Sox5/DAPI		Bins	Sox5	DAPI	Sox5/DAPI
	1	171.667	249.667	0.687583		1	149.333	299.333	0.498886		1	170.333	312.333	0.545358			1	223	277	0.805054		1	195.5	293	0.667235		1	147.5	244.5	0.603272				1	218.667	316.667	0.690526		1	224.333	391.667	0.572766		1	178.667	317	0.563617
	2	213.667	248.667	0.859249		2	231.667	314.667	0.736229		2	229.333	331	0.69285			2	228	309	0.737864		2	182.5	268.5	0.679702		2	163.5	254.5	0.642436				2	307.333	330.667	0.929435		2	343.333	409	0.839446		2	264.333	325.667	0.811668
	3	209.667	263	0.797212		3	215	301.667	0.712707		3	191.667	355.667	0.538894			3	195.5	338	0.578402		3	132	249	0.53012		3	147.5	258.5	0.5706				3	297.333	312.667	0.950959		3	324.667	401.333	0.80897		3	225.667	329.667	0.68453
	4	130	271.333	0.479115		4	142.333	287.667	0.494786		4	135.667	365.667	0.371012			4	145.5	328.5	0.442922		4	87	252	0.345238		4	107	246	0.434959				4	183	286.333	0.639115		4	231.333	374.667	0.617438		4	157.333	325.667	0.483112
	5	20	252	0.0793651		5	38.3333	306	0.125272		5	16.3333	320.333	0.0509886			5	29	310	0.0935484		5	12	219	0.0547945		5	23	232.5	0.0989247				5	13.6667	299	0.0457079		5	45.6667	358.667	0.127323		5	37.3333	294.667	0.126697
	6	8	106.333	0.0752351		6	6.33333	130.667	0.0484694		6	3.66667	160	0.0229167			6	9	141.5	0.0636042		6	3.5	124	0.0282258		6	7	117	0.0598291				6	2	155.667	0.012848		6	4	169	0.0236686		6	6.33333	140.333	0.0451306
	Total	753	1391	0.541337		Total	783	1640	0.477439		Total	747	1845	0.404878			Total	830	1704	0.487089		Total	612.5	1405.5	0.435788		Total	595.5	1353	0.440133				Total	1022	1701	0.600823		Total	1173.33	2104.33	0.55758		Total	869.667	1733	0.501827
	Average Ctrl																Average 315T																	Average Ctrl
	Bins	Sox5	DAPI ctrl	Sox5/DAPI ctrl													Bins	Sox5	DAPI 315T	Sox5/DAPI 315T														Bins	Sox5	DAPI ctrl	Sox5/DAPI ctrl
	1	163.778	287.111	0.570433													1	188.667	271.5	0.694905														1	207.222	341.778	0.606307
	2	224.889	298.111	0.754379													2	191.333	277.333	0.689904														2	305	355.111	0.858886
	3	205.444	306.778	0.669685													3	158.333	281.833	0.561798														3	282.556	347.889	0.812201
	4	136	308.222	0.44124													4	113.167	275.5	0.410768														4	190.556	328.889	0.579392
	5	24.8889	292.778	0.0850095													5	21.3333	253.833	0.0840446														5	32.2222	317.444	0.101505
	6	6	132.333	0.0453401													6	6.5	127.5	0.0509804														6	4.11111	155	0.0265233
	Total	761	1625.33	0.468212													Total	679.333	1487.5	0.456695														Total	1021.67	1846.11	0.553416
	ctrl1	ctrl2	ctrl3	315T1	315T2	315T3		Error ctrl	Error 315T																									ctrl1	ctrl2	ctrl3	cko1	cko2	cko3		Error ctrl	Error cko
Bins	Sox5/DAPI	Sox5/DAPI	Sox5/DAPI	Sox5/DAPI	Sox5/DAPI	Sox5/DAPI		Sox5/DAPI	Sox5/DAPI	T-test																							Bins	Sox5/DAPI	Sox5/DAPI	Sox5/DAPI	Sox5/DAPI	Sox5/DAPI	Sox5/DAPI		Sox5/DAPI	Sox5/DAPI	T-test
1	0.687583	0.498886	0.545358	0.805054	0.667235	0.603272		0.0567619	0.0595359	0.236072																							1	0.690526	0.572766	0.563617	0.753247	0.774527	0.619377		0.0408637	0.04856	0.167868
2	0.859249	0.736229	0.69285	0.737864	0.679702	0.642436		0.0498356	0.0277669	0.253061																							2	0.929435	0.839446	0.811668	0.868726	0.917241	0.737478		0.0355425	0.0536938	0.78224
3	0.797212	0.712707	0.538894	0.578402	0.53012	0.5706		0.0760409	0.014964	0.187022																							3	0.950959	0.80897	0.68453	0.769928	0.78115	0.653913		0.0769672	0.0406712	0.41105
4	0.479115	0.494786	0.371012	0.442922	0.345238	0.434959		0.0389101	0.0313187	0.461944																							4	0.639115	0.617438	0.483112	0.66362	0.576433	0.661319		0.0487913	0.0286865	0.394849
5	0.0793651	0.125272	0.0509886	0.0935484	0.0547945	0.0989247		0.021642	0.0139009	0.91896																							5	0.0457079	0.127323	0.126697	0.124294	0.128972	0.186691		0.0271013	0.020065	0.237957
6	0.0752351	0.0484694	0.0229167	0.0636042	0.0282258	0.0598291		0.0151044	0.0112167	0.933166																							6	0.012848	0.0236686	0.0451306	0.0538721	0.0627615	0.0442478		0.00948647	0.00534585	0.0723318
Total	0.541337	0.477439	0.404878	0.487089	0.435788	0.440133		0.0394188	0.0164242	0.660625																							Total	0.600823	0.55758	0.501827	0.578418	0.601129	0.536928		0.0286536	0.0187956	0.613394
[truncated: 12 more columns]

## Sheet: Ctip2
	MA
	Ctrl																CKO
	N1	sa1					sa2					sa3					N1	sa1					sa2					sa3
	Bins	Ctip2	DAPI	Ctip2/DAPI		Bins	Ctip2	DAPI	Ctip2/DAPI		Bins	Ctip2	DAPI	Ctip2/DAPI			Bins	Ctip2	DAPI	Ctip2/DAPI		Bins	Ctip2	DAPI	Ctip2/DAPI		Bins	Ctip2	DAPI	Ctip2/DAPI					Ctrl N1	SA1					SA2					SA3
	1	36	361	0.099723		1	25	250	0.1		1			#DIV/0!			1	42	361	0.116343		1	33	354	0.0932203		1			#DIV/0!					Bins	Ctip2	DAPI	Ctip2/DAPI		Bins	Ctip2	DAPI	Ctip2/DAPI		Bins	Ctip2	DAPI	Ctip2/DAPI
	2	41	407	0.100737		2	22	288	0.0763889		2			#DIV/0!			2	66	372	0.177419		2	48	367	0.13079		2			#DIV/0!					1	73	334	0.218563		1	32	321	0.0996885		1			#DIV/0!
	3	133	380	0.35		3	90	292	0.308219		3			#DIV/0!			3	121	362	0.334254		3	132	397	0.332494		3			#DIV/0!					2	31	362	0.0856354		2	28	324	0.0864198		2			#DIV/0!
	4	131	375	0.349333		4	113	250	0.452		4			#DIV/0!			4	115	392	0.293367		4	87	354	0.245763		4			#DIV/0!					3	117	352	0.332386		3	87	315	0.27619		3			#DIV/0!
	5	24	370	0.0648649		5	13	298	0.0436242		5			#DIV/0!			5	2	364	0.00549451		5	10	399	0.0250627		5			#DIV/0!					4	143	354	0.403955		4	120	311	0.385852		4			#DIV/0!
	6	0	207	0		6	1	152	0.00657895		6			#DIV/0!			6	0	234	0		6	0	166	0		6			#DIV/0!					5	23	336	0.0684524		5	12	272	0.0441176		5			#DIV/0!
	Total	365	2100	0.17381		Total	264	1530	0.172549		Total	0	0	#DIV/0!			Total	346	2085	0.165947		Total	310	2037	0.152185		Total	0	0	#DIV/0!					6	9	131	0.0687023		6	0	137	0		6			#DIV/0!
																																			Total	396	1869	0.211878		Total	279	1680	0.166071		Total	0	0	#DIV/0!
	N2																N2
	Bins	Ctip2	DAPI	Ctip2/DAPI		Bins	Ctip2	DAPI	Ctip2/DAPI		Bins	Ctip2	DAPI	Ctip2/DAPI			Bins	Ctip2	DAPI	Ctip2/DAPI		Bins	Ctip2	DAPI	Ctip2/DAPI		Bins	Ctip2	DAPI	Ctip2/DAPI					Ctrl N2
	1	39	346	0.112717		1	36	327	0.110092		1			#DIV/0!			1	42	312	0.134615		1	66	322	0.204969		1			#DIV/0!					Bins	Ctip2	DAPI	Ctip2/DAPI		Bins	Ctip2	DAPI	Ctip2/DAPI		Bins	Ctip2	DAPI	Ctip2/DAPI
	2	36	357	0.10084		2	44	382	0.115183		2			#DIV/0!			2	29	335	0.0865672		2	36	319	0.112853		2			#DIV/0!					1	45	346	0.130058		1	13	269	0.0483271		1	13	269	0.0483271
	3	109	334	0.326347		3	134	363	0.369146		3			#DIV/0!			3	150	332	0.451807		3	75	307	0.2443		3			#DIV/0!					2	64	345	0.185507		2	46	253	0.181818		2	46	253	0.181818
	4	115	351	0.327635		4	120	365	0.328767		4			#DIV/0!			4	112	336	0.333333		4	127	333	0.381381		4			#DIV/0!					3	103	322	0.319876		3	99	251	0.394422		3	99	251	0.394422
	5	10	368	0.0271739		5	2	337	0.00593472		5			#DIV/0!			5	24	310	0.0774194		5	63	321	0.196262		5			#DIV/0!					4	88	294	0.29932		4	78	272	0.286765		4	78	272	0.286765
	6	0	170	0		6	0	148	0		6			#DIV/0!			6	0	143	0		6	0	184	0		6			#DIV/0!					5	9	292	0.0308219		5	7	260	0.0269231		5	7	260	0.0269231
	Total	309	1926	0.160436		Total	336	1922	0.174818		Total	0	0	#DIV/0!			Total	357	1768	0.201923		Total	367	1786	0.205487		Total	0	0	#DIV/0!					6	1	129	0.00775194		6	2	99	0.020202		6	2	99	0.020202
																																			Total	310	1728	0.179398		Total	245	1404	0.174501		Total	245	1404	0.174501
	N3																N3
	Bins	Ctip2	DAPI	Ctip2/DAPI		Bins	Ctip2	DAPI	Ctip2/DAPI		Bins	Ctip2	DAPI	Ctip2/DAPI			Bins	Ctip2	DAPI	Ctip2/DAPI		Bins	Ctip2	DAPI	Ctip2/DAPI		Bins	Ctip2	DAPI	Ctip2/DAPI					Ctrl N3
	1	61	297	0.205387		1	24	339	0.0707965		1			#DIV/0!			1	41	287	0.142857		1	36	333	0.108108		1			#DIV/0!					Bins	Ctip2	DAPI	Ctip2/DAPI		Bins	Ctip2	DAPI	Ctip2/DAPI		Bins	Ctip2	DAPI	Ctip2/DAPI
	2	36	309	0.116505		2	34	355	0.0957746		2			#DIV/0!			2	19	305	0.0622951		2	24	340	0.0705882		2			#DIV/0!					1	36	292	0.123288		1	42	395	0.106329		1			#DIV/0!
	3	108	348	0.310345		3	125	360	0.347222		3			#DIV/0!			3	70	303	0.231023		3	74	340	0.217647		3			#DIV/0!					2	26	347	0.074928		2	19	412	0.0461165		2			#DIV/0!
	4	135	363	0.371901		4	90	343	0.262391		4			#DIV/0!			4	129	331	0.389728		4	113	359	0.314763		4			#DIV/0!					3	116	334	0.347305		3	93	430	0.216279		3			#DIV/0!
	5	27	349	0.0773639		5	0	293	0		5			#DIV/0!			5	18	291	0.0618557		5	54	336	0.160714		5			#DIV/0!					4	99	316	0.313291		4	110	426	0.258216		4			#DIV/0!
	6	1	198	0.00505051		6	0	133	0		6			#DIV/0!			6	0	152	0		6	0	156	0		6			#DIV/0!					5	67	314	0.213376		5	8	434	0.0184332		5			#DIV/0!
	Total	368	1864	0.197425		Total	273	1823	0.149753		Total			#DIV/0!			Total	277	1669	0.165968		Total	301	1864	0.161481		Total	0	0	#DIV/0!					6	0	165	0		6	0	127	0		6			#DIV/0!
																																			Total	344	1768	0.19457		Total	272	2224	0.122302		Total	0	0	#DIV/0!
	Average ctrl N1					Average ctrl N2					Average ctrl N3						Average cko N1					Average CKO N2					Average CKO N3
	Bins	Ctip2	DAPI	Ctip2/DAPI		Bins	Ctip2	DAPI	Ctip2/DAPI		Bins	Ctip2	DAPI	Ctip2/DAPI			Bins	Ctip2	DAPI	Ctip2/DAPI		Bins	Ctip2	DAPI	Ctip2/DAPI		Bins	Ctip2	DAPI	Ctip2/DAPI					Average Ctrl N1					Average ctrl N2					Average Ctrl N3
	1	30.5	305.5	0.0998363		1	37.5	336.5	0.111441		1	42.5	318	0.133648			1	37.5	357.5	0.104895		1	54	317	0.170347		1	38.5	310	0.124194					Bins	Ctip2	DAPI	Ctip2/DAPI		Bins	Ctip2	DAPI	Ctip2/DAPI		Bins	Ctip2	DAPI	Ctip2/DAPI
	2	31.5	347.5	0.0906475		2	40	369.5	0.108254		2	35	332	0.105422			2	57	369.5	0.154263		2	32.5	327	0.0993884		2	21.5	322.5	0.0666667					1	52.5	327.5	0.160305		1	23.6667	294.667	0.0803167		1	39	343.5	0.113537
	3	111.5	336	0.331845		3	121.5	348.5	0.348637		3	116.5	354	0.329096			3	126.5	379.5	0.333333		3	112.5	319.5	0.352113		3	72	321.5	0.22395					2	29.5	343	0.0860058		2	52	283.667	0.183314		2	22.5	379.5	0.0592885
	4	122	312.5	0.3904		4	117.5	358	0.328212		4	112.5	353	0.318697			4	101	373	0.270777		4	119.5	334.5	0.35725		4	121	345	0.350725					3	102	333.5	0.305847		3	100.333	274.667	0.365291		3	104.5	382	0.27356
	5	18.5	334	0.0553892		5	6	352.5	0.0170213		5	13.5	321	0.0420561			5	6	381.5	0.0157274		5	43.5	315.5	0.137876		5	36	313.5	0.114833					4	131.5	332.5	0.395489		4	81.3333	279.333	0.291169		4	104.5	371	0.281671
	6	0.5	179.5	0.00278552		6	0	159	0		6	0.5	165.5	0.00302115			6	0	200	0		6	0	163.5	0		6	0	154	0					5	17.5	304	0.0575658		5	7.66667	270.667	0.0283251		5	37.5	374	0.100267
	Total	314.5	1815	0.173278		Total	322.5	1924	0.16762		Total	320.5	1843.5	0.173854			Total	328	2061	0.159146		Total	362	1777	0.203714		Total	289	1766.5	0.1636					6	4.5	134	0.0335821		6	1.66667	109	0.0152905		6	0	146	0
																																			Total	337.5	1774.5	0.190194		Total	266.667	1512	0.176367		Total	308	1996	0.154309
	Average Ctrl																Average cko
	Bins	Ctip2	DAPI	Ctip2/DAPI cTRL													Bins	Ctip2	DAPI	Ctip2/DAPI cko															Average Ctrl
	1	36.8333	320	0.115104													1	43.3333	328.167	0.132047															Bins	Ctip2	DAPI	Ctip2/DAPI CTRL
	2	35.5	349.667	0.101525													2	37	339.667	0.10893															1	38.3889	321.889	0.119261
	3	116.5	346.167	0.336543													3	103.667	340.167	0.304753															2	34.6667	335.389	0.103363
	4	117.333	341.167	0.343918													4	113.833	350.833	0.324466															3	102.278	330.056	0.30988
	5	12.6667	335.833	0.0377171													5	28.5	336.833	0.0846116															4	105.778	327.611	0.322876
	6	0.333333	168	0.00198413													6	0	172.5	0															5	20.8889	316.222	0.0660576
	Total	319.167	1860.83	0.171518													Total	326.333	1868.17	0.174681															6	2.05556	129.667	0.0158526
																																			Total	304.056	1760.83	0.172677
	ctrl1	ctrl2	ctrl3	cko1	cko2	cko3		Error ctrl	Error cko	T-test
Bins	Ctip2/DAPI	Ctip2/DAPI	Ctip2/DAPI	Ctip2/DAPI	Ctip2/DAPI	Ctip2/DAPI																													ctrl1	ctrl2	ctrl3	315T1	315T2	315T3		Error ctrl	Error 315T	T-test
1	0.0998363	0.111441	0.133648	0.104895	0.170347	0.124194		0.00991917	0.0194172	0.451525																								Bins	Ctip2/DAPI	Ctip2/DAPI	Ctip2/DAPI	Ctip2/DAPI	Ctip2/DAPI	Ctip2/DAPI		Ctip2/DAPI	Ctip2/DAPI	Ctip2/DAPI
2	0.0906475	0.108254	0.105422	0.154263	0.0993884	0.0666667		0.00545845	0.0255549	0.848297																								1	0.160305	0.0803167	0.113537	0.0844444	0.122931	0.212629		0.0232009	0.0379752	0.647717
3	0.331845	0.348637	0.329096	0.333333	0.352113	0.22395		0.00610724	0.0399604	0.455179																								2	0.0860058	0.183314	0.0592885	0.0908326	0.0964813	0.164072		0.0376865	0.0235282	0.872602
4	0.3904	0.328212	0.318697	0.270777	0.35725	0.350725		0.0224836	0.0278004	0.614138																								3	0.305847	0.365291	0.27356	0.245143	0.301003	0.27724		0.0268645	0.0161851	0.266791
5	0.0553892	0.0170213	0.0420561	0.0157274	0.137876	0.114833		0.0112463	0.0374709	0.259788																								4	0.395489	0.291169	0.281671	0.264678	0.295556	0.36152		0.0364594	0.0285609	0.754302
6	0.00278552	0	0.00302115	0	0	0		0.000970165	0	0.116771																								5	0.0575658	0.0283251	0.100267	0.0179487	0.0855803	0.0709505		0.0208888	0.0205443	0.900712
Total	0.173278	0.16762	0.173854	0.159146	0.203714	0.1636		0.00198916	0.0141721	0.79857																								6	0.0335821	0.0152905	0	0.00141643	0.00235294	0.008		0.00970721	0.00205629	0.280619
																																		Total	0.190194	0.176367	0.154309	0.121236	0.166389	0.2016		0.0104498	0.0232581	0.700318

## Sheet: tbr1
	MA
	Ctrl																CKO
	N1	sa1					sa2					sa3					N1	sa1					sa2					sa3							Ctrl N1	SA1					SA2					SA3
	Bins	tbr1	DAPI	tbr1/DAPI		Bins	tbr1	DAPI	tbr1/DAPI		Bins	tbr1	DAPI	tbr1/DAPI			Bins	tbr1	DAPI	tbr1/DAPI		Bins	tbr1	DAPI	tbr1/DAPI		Bins	tbr1	DAPI	tbr1/DAPI					Bins	tbr1	DAPI	tbr1/DAPI		Bins	tbr1	DAPI	tbr1/DAPI		Bins	tbr1	DAPI	tbr1/DAPI
	1	232	346	0.67052		1	174	249	0.698795		1			#DIV/0!			1	209	322	0.649068		1	162	287	0.56446		1			#DIV/0!					1	197	361	0.545706		1	148	264	0.560606		1			#DIV/0!
	2	244	345	0.707246		2	183	218	0.83945		2			#DIV/0!			2	266	319	0.833856		2	197	305	0.645902		2			#DIV/0!					2	252	407	0.619165		2	194	289	0.67128		2			#DIV/0!
	3	179	322	0.555901		3	107	223	0.479821		3			#DIV/0!			3	231	307	0.752443		3	170	303	0.561056		3			#DIV/0!					3	198	380	0.521053		3	151	289	0.522491		3			#DIV/0!
	4	37	294	0.12585		4	21	206	0.101942		4			#DIV/0!			4	68	333	0.204204		4	54	331	0.163142		4			#DIV/0!					4	88	375	0.234667		4	26	282	0.0921986		4			#DIV/0!
	5	16	292	0.0547945		5	8	258	0.0310078		5			#DIV/0!			5	65	321	0.202492		5	59	291	0.202749		5			#DIV/0!					5	66	370	0.178378		5	36	255	0.141176		5			#DIV/0!
	6	9	129	0.0697674		6	4	104	0.0384615		6			#DIV/0!			6	33	184	0.179348		6	4	152	0.0263158		6			#DIV/0!					6	58	207	0.280193		6	16	164	0.097561		6			#DIV/0!
	Total	717	1728	0.414931		Total	497	1258	0.395072		Total			#DIV/0!			Total	872	1786	0.488242		Total	646	1669	0.387058		Total			#DIV/0!					Total	859	2100	0.409048		Total	571	1543	0.370058		Total	0	0	#DIV/0!
	Ctrl N2																CKO N2																		Ctrl N2
	Bins	tbr1	DAPI	tbr1/DAPI		Bins	tbr1	DAPI	tbr1/DAPI		Bins	tbr1	DAPI	tbr1/DAPI			Bins	tbr1	DAPI	tbr1/DAPI		Bins	tbr1	DAPI	tbr1/DAPI		Bins	tbr1	DAPI	tbr1/DAPI					Bins	tbr1	DAPI	tbr1/DAPI		Bins	tbr1	DAPI	tbr1/DAPI		Bins	tbr1	DAPI	tbr1/DAPI
	1	190	292	0.650685		1	233	395	0.589873		1			#DIV/0!			1	201	312	0.644231		1	245	361	0.67867		1			#DIV/0!					1	107	250	0.428		1	173	327	0.529052		1			#DIV/0!
	2	230	347	0.662824		2	299	412	0.725728		2			#DIV/0!			2	247	335	0.737313		2	296	372	0.795699		2			#DIV/0!					2	187	288	0.649306		2	217	382	0.568063		2			#DIV/0!
	3	205	334	0.613772		3	215	430	0.5		3			#DIV/0!			3	205	332	0.61747		3	198	362	0.546961		3			#DIV/0!					3	146	292	0.5		3	147	363	0.404959		3			#DIV/0!
	4	15	316	0.0474684		4	3	426	0.00704225		4			#DIV/0!			4	46	336	0.136905		4	52	392	0.132653		4			#DIV/0!					4	28	250	0.112		4	8	365	0.0219178		4			#DIV/0!
	5	2	314	0.00636943		5	6	434	0.0138249		5			#DIV/0!			5	33	310	0.106452		5	34	364	0.0934066		5			#DIV/0!					5	16	298	0.0536913		5	14	337	0.041543		5			#DIV/0!
	6	1	165	0.00606061		6	0	127	0		6			#DIV/0!			6	14	143	0.0979021		6	22	234	0.0940171		6			#DIV/0!					6	5	152	0.0328947		6	0	148	0		6			#DIV/0!
	Total	643	1768	0.363688		Total	756	2224	0.339928		Total			#DIV/0!			Total	746	1768	0.421946		Total	847	2085	0.406235		Total			#DIV/0!					Total	489	1530	0.319608		Total	559	1922	0.290843		Total	0	0	#DIV/0!
	Ctrl N3
	1026																CKO N3																		Ctrl N3
	Bins	tbr1	DAPI	tbr1/DAPI		Bins	tbr1	DAPI	tbr1/DAPI		Bins	tbr1	DAPI	tbr1/DAPI			Bins	tbr1	DAPI	tbr1/DAPI		Bins	tbr1	DAPI	tbr1/DAPI		Bins	tbr1	DAPI	tbr1/DAPI					Bins	tbr1	DAPI	tbr1/DAPI		Bins	tbr1	DAPI	tbr1/DAPI		Bins	tbr1	DAPI	tbr1/DAPI
	1	203	346	0.586705		1	175	297	0.589226		1			#DIV/0!			1	232	333	0.696697		1	195	354	0.550847		1			#DIV/0!					1	225	367	0.613079		1	209	269	0.776952		1			#DIV/0!
	2	240	357	0.672269		2	182	276	0.65942		2			#DIV/0!			2	291	340	0.855882		2	188	367	0.512262		2			#DIV/0!					2	243	369	0.658537		2	228	253	0.901186		2			#DIV/0!
	3	154	334	0.461078		3	144	302	0.476821		3			#DIV/0!			3	270	340	0.794118		3	131	397	0.329975		3			#DIV/0!					3	122	353	0.345609		3	141	251	0.561753		3			#DIV/0!
	4	10	351	0.02849		4	26	278	0.0935252		4			#DIV/0!			4	50	359	0.139276		4	16	354	0.0451977		4			#DIV/0!					4	3	356	0.00842697		4	26	272	0.0955882		4			#DIV/0!
	5	0	368	0		5	35	286	0.122378		5			#DIV/0!			5	38	336	0.113095		5	4	399	0.0100251		5			#DIV/0!					5	0	353	0		5	22	260	0.0846154		5			#DIV/0!
	6	1	170	0.00588235		6	15	105	0.142857		6			#DIV/0!			6	25	156	0.160256		6	3	166	0.0180723		6			#DIV/0!					6	0	147	0		6	35	99	0.353535		6			#DIV/0!
	Total	608	1926	0.31568		Total	577	1544	0.373705		Total			#DIV/0!			Total	906	1864	0.486052		Total	537	2037	0.263623		Total			#DIV/0!					Total	593	1945	0.304884		Total	661	1404	0.470798		Total	0	0	#DIV/0!
	Average ctrl N1					Average ctrl N2					Average ctrl N3						Average cko N1					Average CKO N2					Average CKO N3								Average ctrl N1					Average Ctrl N2					Average Ctrl N3
	Bins	tbr1	DAPI	tbr1/DAPI		Bins	tbr1	DAPI	tbr1/DAPI		Bins	tbr1	DAPI	tbr1/DAPI			Bins	tbr1	DAPI	tbr1/DAPI		Bins	tbr1	DAPI	tbr1/DAPI		Bins	tbr1	DAPI	tbr1/DAPI					Bins	tbr1	DAPI	tbr1/DAPI		Bins	tbr1	DAPI	tbr1/DAPI		Bins	tbr1	DAPI	tbr1/DAPI
	1	203	297.5	0.682353		1	211.5	343.5	0.615721		1	189	321.5	0.587869			1	185.5	304.5	0.609195		1	223	336.5	0.662704		1	213.5	343.5	0.621543					1	172.5	312.5	0.552		1	140	288.5	0.485269		1	217	318	0.68239
	2	213.5	281.5	0.758437		2	264.5	379.5	0.69697		2	211	316.5	0.666667			2	231.5	312	0.741987		2	271.5	353.5	0.768034		2	239.5	353.5	0.677511					2	223	348	0.640805		2	202	335	0.602985		2	235.5	311	0.757235
	3	143	272.5	0.524771		3	210	382	0.549738		3	149	318	0.468553			3	200.5	305	0.657377		3	201.5	347	0.580692		3	200.5	368.5	0.544098					3	174.5	334.5	0.521674		3	146.5	327.5	0.447328		3	131.5	302	0.43543
	4	29	250	0.116		4	9	371	0.0242588		4	18	314.5	0.0572337			4	51	332	0.153614		4	49	364	0.134615		4	33	356.5	0.0925666					4	57	328.5	0.173516		4	18	307.5	0.0585366		4	14.5	314	0.0461783
	5	12	275	0.0436364		5	4	374	0.0106952		5	17.5	327	0.0535168			5	32	306	0.104575		5	33.5	337	0.0994065		5	21	367.5	0.0571429					5	51	312.5	0.1632		5	15	317.5	0.0472441		5	11	306.5	0.0358891
	6	6.5	116.5	0.055794		6	0.5	146	0.00342466		6	8	137.5	0.0581818			6	5	168	0.0297619		6	18	188.5	0.0954907		6	14	161	0.0869565					6	37	185.5	0.199461		6	2.5	150	0.0166667		6	17.5	123	0.142276
	Total	607	1493	0.406564		Total	699.5	1996	0.350451		Total	592.5	1735	0.341499			Total	705.5	1727.5	0.408394		Total	796.5	1926.5	0.413444		Total	721.5	1950.5	0.369905					Total	715	1821.5	0.392534		Total	524	1726	0.303592		Total	627	1674.5	0.37444
	Average Ctrl																Average CKO
	Bins	Tbr1	DAPI	tbr1/DAPI CTRL													Bins	Tbr1	DAPI	tbr1/DAPI CKO															Bins	Tbr1	DAPI	Tbr1/DAPI CTRL
	1	201.167	320.833	0.627013													1	207.333	328.167	0.631793															1	176.5	306.333	0.57617
	2	229.667	325.833	0.704859													2	247.5	339.667	0.728656															2	220.167	331.333	0.664487
	3	167.333	324.167	0.516195													3	200.833	340.167	0.590397															3	150.833	321.333	0.469398
	4	18.6667	311.833	0.059861													4	44.3333	350.833	0.126366															4	29.8333	316.667	0.0942105
	5	11.1667	325.333	0.0343238													5	28.8333	336.833	0.0856012															5	25.6667	312.167	0.082221
	6	5	133.333	0.0375													6	12.3333	172.5	0.0714976															6	19	152.833	0.124318
	Total	633	1741.33	0.363515													Total	741.167	1868.17	0.396735															Total	622	1740.67	0.357334
	ctrl1	ctrl2	ctrl3	cko1	cko2	cko3		Error ctrl	Error cko	T-test																									ctrl1	ctrl2	ctrl3	315T1	315T2	315T3		Error ctrl	Error 315T	T-test
	tbr1/DAPI	tbr1/DAPI	tbr1/DAPI	tbr1/DAPI	tbr1/DAPI	tbr1/DAPI		tbr1/DAPI	tbr1/DAPI	tbr1/DAPI																									tbr1/DAPI	tbr1/DAPI	tbr1/DAPI	tbr1/DAPI	tbr1/DAPI	tbr1/DAPI		tbr1/DAPI	tbr1/DAPI	tbr1/DAPI
	0.682353	0.615721	0.587869	0.609195	0.662704	0.621543		0.0280305	0.016176	0.942137																									0.552	0.485269	0.68239	0.58728	0.621291	0.708649		0.0578847	0.0361469	0.389199
	0.758437	0.69697	0.666667	0.741987	0.768034	0.677511		0.0269962	0.0269053	0.597639																									0.640805	0.602985	0.757235	0.5798	0.701812	0.698941		0.0464155	0.0402006	0.91687
	0.524771	0.549738	0.468553	0.657377	0.580692	0.544098		0.0240078	0.0333766	0.124586																									0.521674	0.447328	0.43543	0.462079	0.484245	0.372549		0.0269844	0.0341427	0.548021
	0.116	0.0242588	0.0572337	0.153614	0.134615	0.0925666		0.02683	0.0180368	0.131755																									0.173516	0.0585366	0.0461783	0.0886628	0.188356	0.133433		0.0405434	0.0288287	0.425699
	0.0436364	0.0106952	0.0535168	0.104575	0.0994065	0.0571429		0.0129453	0.0150236	0.061567																									0.1632	0.0472441	0.0358891	0.1321	0.306228	0.156977		0.0406768	0.0543729	0.16186
	0.055794	0.00342466	0.0581818	0.0297619	0.0954907	0.0869565		0.0178677	0.0206348	0.311369																									0.199461	0.0166667	0.142276	0.0780287	0.349442	0.253333		0.0539864	0.0794544	0.325894
	0.406564	0.350451	0.341499	0.408394	0.413444	0.369905		0.0203611	0.0137488	0.27458																									0.392534	0.303592	0.37444	0.34098	0.452707	0.395368		0.0271389	0.0322566	0.401837

## Sheet: DAPI
	Ctrl N1			Ctrl N2			Ctrl N3				CKO N1			CKO N2			CKO N3						Ctrl N1			Ctrl N2				Ctrl N3				315T N1				315T N2				315T N3
	SA1	SA2		SA1	SA2		SA1	SA2			SA1	SA2		SA1	SA2		SA1	SA2				Bins	SA1	SA2		SA1	SA2	SA3		SA1	SA2			SA1	SA2	SA3		SA1	SA2	SA3		SA1	SA2	SA3
Bins	361	250		346	327		297	339			361	354		312	322		287	333				1	334	321		346	269	269		292	395			394	345	386		310	273	263		252	287	237
1	407	288		357	382		309	355			372	367		335	319		305	340				2	362	324		345	253	253		347	412			438	364	387		338	274	269		260	326	249
2	380	292		334	363		348	360			362	397		332	307		303	340				3	352	315		322	251	251		334	430			379	333	369		323	294	280		262	309	255
3	375	250		351	365		363	343			392	354		336	333		331	359				4	354	311		294	272	272		316	426			383	305	351		305	316	279		257	324	235
4	370	298		368	337		349	293			364	399		310	321		291	336				5	336	272		292	260	260		314	434			434	323	413		312	275	266		245	282	220
5	207	152		170	148		198	133			234	166		143	184		152	156				6	131	137		129	99	99		165	127			164	323	219		137	156	132		127	141	107
6	2100	1530		1926	1922		1864	1823			2085	2037		1768	1786		1669	1864				Total	1869	1680		1728	1404	1404		1768	2224			2192	1993	2125		1725	1588	1489		1403	1669	1303
Total
Bins	Average Ctrl N1			Average Ctrl N2			Average Ctrl N3				Average CKO N1			Average CKO N2			Average CKO N3					Bins	Average Ctrl N1			Average Ctrl N2				Average Ctrl N3				Average 315TN1				Average 315TN2				Average 315TN3
1	305.5			336.5			318				357.5			317			310					1	327.5			294.667				343.5				375				282				258.667
2	347.5			369.5			332				369.5			327			322.5					2	343			283.667				379.5				396.333				293.667				278.333
3	336			348.5			354				379.5			319.5			321.5					3	333.5			274.667				382				360.333				299				275.333
4	312.5			358			353				373			334.5			345					4	332.5			279.333				371				346.333				300				272
5	334			352.5			321				381.5			315.5			313.5					5	304			270.667				374				390				284.333				249
6	179.5			159			165.5				200			163.5			154					6	134			109				146				235.333				141.667				125
Total	1815			1924			1843.5				2061			1777			1766.5					Total	1774.5			1512				1996				2103.33				1600.67				1458.33
	ctrl1	ctrl2	ctrl3	cko1	cko2	cko3																	ctrl1	ctrl2	ctrl3	315T1	315T2	315T3		Error ctrl	Error 315T	T-test
Bins	DAPI	DAPI	DAPI	DAPI	DAPI	DAPI		Error ctrl	Error cko	T-test		Average Ctrl	Average CKO									Bins	DAPI	DAPI	DAPI	DAPI	DAPI	DAPI		DAPI	DAPI	DAPI		Average Ctrl	Average 315T
1	305.5	336.5	318	357.5	317	310		9.00463	14.8052	0.661992		320	328.167									1	327.5	294.667	343.5	375	282	258.667		14.3734	35.5332	0.686125		321.889	305.222
2	347.5	369.5	332	369.5	327	322.5		10.8794	14.9731	0.617669		349.667	339.667									2	343	283.667	379.5	396.333	293.667	278.333		27.9252	37.0432	0.799191		335.389	322.778
3	336	348.5	354	379.5	319.5	321.5		5.32552	19.6751	0.783126		346.167	340.167									3	333.5	274.667	382	360.333	299	275.333		31.0323	25.3277	0.668189		330.056	311.556
4	312.5	358	353	373	334.5	345		14.4058	11.4903	0.627596		341.167	350.833									4	332.5	279.333	371	346.333	300	272		26.5746	21.6746	0.564696		327.611	306.111
5	334	352.5	321	381.5	315.5	313.5		9.13935	22.3408	0.96894		335.833	336.833									5	304	270.667	374	390	284.333	249		30.4493	42.3575	0.879252		316.222	307.778
6	179.5	159	165.5	200	163.5	154		6.04842	14.0208	0.782885		168	172.5									6	134	109	146	235.333	141.667	125		10.8985	34.3387	0.3548		129.667	167.333
Total	1815	1924	1843.5	2061	1777	1766.5		32.6373	96.4643	0.94605		1860.83	1868.17									Total	1774.5	1512	1996	2103.33	1600.67	1458.33		139.886	195.641	0.875807		1760.83	1720.78
