# Supplementary material for: Pum2 and TDP-43 refine area-specific cytoarchitecture post-mitotically and modulate translation of Sox5, Bcl11b, and Rorb mRNAs in developing mouse neocortex
Source: eLife. 2022 Mar 9;11:e55199. doi: 10.7554/eLife.55199 (PMC8906809; doi:10.7554/eLife.55199)
Supplement: Source data 4. — qRT-PCR of E14.5 cortical RNA from controls (Ctrl) vs. Pum2 cKO using primers to the floxed exons. The fold change in expression levels of Pum2 mRNA normalized to GAPDH mRNA in the Pum2 cKO is shown relative to the Cre- control (Ctrl) in Figure 1—figure supplement 1c. Data are shown as means ± standard error of the mean (SEM), n = 3 for each genotype. * p≤0.05, two-tailed t-test. [file elife-55199-data4.xlsx]

## Sheet: Sheet1
													Fold Change CKO to WT
	E14,5	CTs												Pum2 KO5
		GAPDH	W1 Primer Pum2 KO				GAPDH	W1 Primer Pum2 KO					wt1/wt	1.35966
		21.6731	22.7976			w1	1	0.395728					wt2/wt	0.579142
		21.5514				w2	1	0.168558					wt3/wt	1.06119
		21.7004	23.1605			w3	1	0.308858					CKO1/wt	0.277341
	Mean	21.6416	22.979			cko1	1	0.0807195					CKO2/wt	0.175519
	∆ CT	0	1.33742			cko2	1	0.0510845					cko3/wt	0.0975489
	fold change	1	0.395728			cko3	1	0.0283914					wt/Wt	1
													CKO/WT	0.18347
		GAPDH	W2 Primer Pum2 KO										stdev wt	0.393843
		21.6432											stdev cko	0.0901593
		21.3704	24.1043										error wt	0.227385
		21.4092	23.9815										error cko	0.0520535
	Mean	21.4743	24.0429										T-test	0.024887
	∆ CT	0	2.56868				Fold Change to GAPDH							*
	fold change	1	0.168558
								GAPDH	W1 Primer Pum2 KO
		GAPDH	W3 Primer Pum2 KO			Average	wt	1	0.291048
		22.9915	24.7752				cko	1	0.0533985
		22.9896
		23.1113	24.6764			stdev	wt	0	0.114627
	Mean	23.0308	24.7258				cko	0	0.0262407
	∆ CT	0	1.69498
	fold change	1	0.308858			std eror	wt	0	0.0661801
							cko	0	0.0151501
						T-test Pum2 CKO			0.024887
	E14,5	CTs							*
		GAPDH	pum2 cko1 primer Pum2 KO
		23.4921	27.0352
		23.5966				wt	0.291048	0.0661801
		23.7203	27.4327			cko	0.0533985	0.0151501
	Mean	23.603	27.2339
	∆ CT	0	3.63094
	fold change	1	0.0807195
		GAPDH	pum2 cko2 primer Pum2 KO
		20.9964	25.227
		20.8517	25.203
	Mean	20.924	25.215
	∆ CT	0	4.29097
	fold change	1	0.0510845
		GAPDH	pum2 cko3 primer Pum2 KO
		22.7795
		22.8973	27.9569
			27.9967
	Mean	22.8384	27.9768
	∆ CT	0	5.1384
	fold change	1	0.0283914
