# Supplementary material for: Pum2 and TDP-43 refine area-specific cytoarchitecture post-mitotically and modulate translation of Sox5, Bcl11b, and Rorb mRNAs in developing mouse neocortex
Source: eLife. 2022 Mar 9;11:e55199. doi: 10.7554/eLife.55199 (PMC8906809; doi:10.7554/eLife.55199)
Supplement: Source data 5. — Quantification of the brain anatomy including hemisphere length, width, and area (Figure 1—figure supplement 2a), cortical thickness (Figure 1—figure supplement 2b), and nuclei size (Figure 1—figure supplement 2c) in Pum2 and TDP-43 mutants. n = 3–6 samples of each genotype. *p≤0.05, two-tailed t-test. Pum2 cKO: Pum2fl/fl; Emx1Cre. [file elife-55199-data5.xlsx]

## Sheet: brain size
						Brain size
		Cortical length	cortical length (mm)	hemisphere width (mm)	hemisphere area (mm2)										cortical length (mm)	hemisphere width (mm)	hemisphere area (mm2)
	ctrl1		3.068	3.888	10.53									ctrl1	3.428	3.691	9.688
	ctrl2		3.692	3.531	9.946									ctrl2	3.331	3.579	10.018
	ctrl3		3.683	3.624	10.226									ctrl3	4.539	3.609	11.986
	ctrl4		4.31	3.601	10.964									315T1	3.385	3.892	11.071
	cko1		4.135	4.297	13.914									315T2	3.635	3.302	8.923
	cko2		3.343	3.696	10.53									315T3	3.472	3.605	9.744
	cko3		3.3	3.871	9.384									315T4	5.163	3.663	14.935
	Average Ctrl	#DIV/0!	3.68825	3.661	10.4165									315T5	3.927	3.532	9.861
	Average CKO		3.59267	3.95467	11.276									Average Ctrl	3.766	3.62633	10.564
	std error ctrl		0.253529	0.0782081	0.218002									Average 315T	3.9164	3.5988	10.9068
	std error CKO		0.271451	0.178466	1.35985									std error ctrl	0.387513	0.033473	0.717353
	T-test		0.809582	0.155437	0.494369									std error 315T	0.325053	0.0955716	1.06383
														T-test	0.781168	0.838977	0.828179

## Sheet: Cortical thickness
	cortical Thickness Image J
	Ctrl1 Sa1	300.339		CKO1 SA1	361.462					Ctrl1 Sa1	419		315T N1 sa1	493
	Ctrl1 sA2	348.736		CKO1 SA2	362.749					Ctrl1 sA2	354.001		315T N1 sa2	471
	Ctrl1 SA3	292.078								Ctrl1 SA3	419.011		315T N1 sa3	555
	Ctrl1 SA4	310.015								average Ctrl 1	397.337		average N1	506.333
	ctrl1 SA5	308.006
	ctrl1 SA6	270.007								Ctrl2 Sa1	425.005		315T N2 sa1	517
	average Ctrl 1	304.863		average CKO1	362.106					Ctrl2 sA2	471		315T N2 sa2	461
										Ctrl2 SA3	401.001		315T N2 sa3	492
										average Ctrl 2	432.335		Average N315TN2	490
	Ctrl2 Sa1	414.071		CKO2 SA1	538.008
	Ctrl2 sA2	388.874		CKO2 SA2	550.833					Ctrl3 Sa1	425.011		315TN3 sa1	429
	Ctrl2 SA3	360.613		CKO2 SA3	331.828					Ctrl3 sA2	379.012		315TN3 sa2	453
	Ctrl2 SA4	451.001		CKO2 SA4	438.001					Ctrl3 SA3	445.004		315TN3 SA3	487
	ctrl2 SA5	465.01		CKO2 SA5	515.001					Ctrl3 SA4	418		Average 315T N3	456.333
	ctrl2 SA6	433.018								average Ctrl 3	416.757
	average Ctrl 2	418.764		average CKO2	474.734								315T N4 SA1	494
										Ctrl4 Sa1	514.009		315T N4 SA2	514
										Ctrl4 sA2	454.004		315T N4 SA3	408
	Ctrl3 Sa1	499.548		CKO3 SA1	434.041					Ctrl4 SA3	369.001		315T N4 SA4	421
	Ctrl3 sA2	520.749		CKO3 SA2	391.1					Ctrl4 SA4	515		Average 315TN4	459.25
	Ctrl3 SA3	515.401		CKO3 SA3	357.824					average Ctrl 4	463.004
	Ctrl3 SA4	467.01		CKO3 SA4	388.247								315T N5 SA1	405
	ctrl3 SA5	419.001		CKO3 SA5	555					Ctrl5 sa1	445		315T N5 SA2	405
	ctrl3 SA6	509.025		CKO3 SA6	518.701					Ctrl5 sa2	398.011		315T N5 SA3	340
	average Ctrl 3	488.456		Average cko3	440.819					Ctrl5 sa3	386.021		Average 315T N5	383.333
										Ctrl5 sa4	441.005
										Ctrl5 sa5	413.044		315T N6 SA1	478
	average Ctrl	404.028		average cko	425.886					Ctrl5 sa6	365.012		315T N6 SA2	457
	stdev	92.679		stdev	57.7801					average Ctrl5	408.015		315T N6 SA3	506
	std error	53.5082		std error	33.3594								average 315T N6	480.333
				T-test	0.746321					ctrl 6 SA1	299.262
										ctrl 6 SA2	361.087
	average Ctrl1	304.863		average cko 1	362.106					ctrl 6 SA3	376.065
	average ctrl2	418.764		average cko 2	474.734					ctrl 6 SA4	323.006
	Average ctrl3	488.456		Average cko 3	440.819					ctrl 6 SA5	293.002
	average ctrl	404.028								ctrl 6 SA6	331.024
	average cko	425.886								ctrl 6 SA7	360.006
	std error ctrl	53.5082								ctrl 6 SA8	332.002
	std error cko	33.3594								ctrl 6 SA9	320.006
										average Ctrl6	332.829
										average Ctrl1	397.337		average 315T N1	506.333
										average ctrl2	432.335		average 315T N2	490
										Average ctrl3	416.757		average 315T N3	456.333
										average Ctrl4	463.004		average 315T N4	459.25
										average ctrl5	408.015		average 315T N5	383.333
										Average ctrl6	332.829		average 315T N6	480.333
										AverageCtrl	408.38
										average 315T	462.597
										std error ctrl	17.7556
										std error 315T	17.6177
										T-test	0.055395

## Sheet: Nuclei size
				Nuclei size average
Ctrl1	Classified image	231	84127199	364.187	20804	255
Ctrl2	Classified image	274	98982475	361.25	24478	255
Ctrl3	Classified image	231	84127199	364.187	20804	255
315T1	Classified image	455	169516215	372.563	41921	0
315T2	Classified image	410	154795526	377.55	38280	0
315T3	Classified image	430	157316076	365.851	38904	0
Average ctrl	363.208
average 315T	371.988
std error ctrl	0.979
std error 315T	3.38943
T-test	0.0675801
Ctrl1	Classified image	117	36395255	311.071	9000	255
Ctrl2	Classified image	144	48460419	336.531	11984	255
Ctrl3	Classified image	155	50625023	326.613	12519	255
cko1	Classified image	342	120119459	351.226	29705	255
cko2	Classified image	469	168815891	359.949	41747	0
cko3	Classified image	436	157813167	361.957	39027	0
cko4	Classified image	522	173589355	332.547	42928	0
Average ctrl	324.738
average CKO	351.42
std error ctrl	10.8926
std error cko	6.7082
T-test	0.0454646	*
