# Supplementary material for: Pum2 and TDP-43 refine area-specific cytoarchitecture post-mitotically and modulate translation of Sox5, Bcl11b, and Rorb mRNAs in developing mouse neocortex
Source: eLife. 2022 Mar 9;11:e55199. doi: 10.7554/eLife.55199 (PMC8906809; doi:10.7554/eLife.55199)
Supplement: Source data 6. — Quantification of results from n = 3 mice of controls and Pum2 KO mice in the pS for Sox5 normalized to DAPI in single bins and total (Figure 1—figure supplement 7). Data are represented as means ± standard error of the mean (SEM). *p≤0.05, **p≤0.01 by two-tailed t-test. Ctrl: controls; Pum2 KO: Pum2 constitutive knockout. [file elife-55199-data6.xlsx]

## Sheet: Sox5 Pum2 KO SA
		ctrl N1
																				Pum2 KO N1
		sa1						sa2												SA1						SA2
	bins	dapi	sox5	sox5/DAPI			bins	dapi	sox5	sox5/DAPI			bins	dapi	sox5	sox5/DAPI				Bins	Sox5	DAPI	Sox5/DAPI			Bins	Sox5	DAPI	Sox5/DAPI
	1	228	127	0.557018			1	307	113	0.368078			1			#DIV/0!				1	279	429	0.65035			1	291	458	0.635371
	2	233	141	0.60515			2	282	142	0.503546			2			#DIV/0!				2	435	480	0.90625			2	433	513	0.844055
	3	260	91	0.35			3	268	67	0.25			3			#DIV/0!				3	296	433	0.683603			3	292	478	0.610879
	4	253	31	0.12253			4	245	8	0.0326531			4			#DIV/0!				4	85	418	0.203349			4	186	470	0.395745
	5	250	0	0			5	264	1	0.00378788			5			#DIV/0!				5	0	464	0			5	21	497	0.0422535
	6	127	2	0.015748			6	121	3	0.0247934			6			#DIV/0!				6	0	167	0			6	0	196	0
	Total	1351	392	0.290155			Total	1487	334	0.224613			Total	0	0	#DIV/0!				Total	1095	2391	0.457967			Total	1223	2612	0.468224
		ctrl N2
																				Pum2 KO N2
		sa1						sa2												SA1						SA2
	bins	dapi	sox5	sox5/DAPI			bins	dapi	sox5	sox5/DAPI			bins	dapi	sox5	sox5/DAPI				Bins	Sox5	DAPI	Sox5/DAPI			Bins	Sox5	DAPI	Sox5/DAPI
	1	323	176	0.544892			1	297	159	0.535354			1			#DIV/0!				1	258	432	0.597222			1	239	379	0.630607
	2	325	161	0.495385			2	285	152	0.533333			2			#DIV/0!				2	406	473	0.858351			2	405	396	1.02273
	3	316	155	0.490506			3	292	156	0.534247			3			#DIV/0!				3	306	463	0.660907			3	321	354	0.90678
	4	290	27	0.0931034			4	286	31	0.108392			4			#DIV/0!				4	126	443	0.284424			4	212	409	0.518337
	5	263	4	0.0152091			5	265	11	0.0415094			5			#DIV/0!				5	0	436	0			5	19	493	0.0385396
	6	100	0	0			6	110	1	0.00909091			6			#DIV/0!				6	0	206	0			6	0	213	0
	Total	1617	523	0.323438			Total	1535	510	0.332248			Total	0	0	#DIV/0!				Total	1096	2453	0.4468			Total	1196	2244	0.532977
		ctrl N3																		Pum2 KO N3
		sa1						sa2												SA1						SA2
	bins	dapi	sox5	sox5/DAPI			bins	dapi	sox5	sox5/DAPI			bins	dapi	sox5	sox5/DAPI				Bins	Sox5	DAPI	Sox5/DAPI			Bins	Sox5	DAPI	Sox5/DAPI
	1	257	131	0.509728			1	286	174	0.608392			1			#DIV/0!				1	269	456	0.589912			1	323	523	0.617591
	2	261	173	0.662835			2	283	165	0.583039			2			#DIV/0!				2	405	489	0.828221			2	472	568	0.830986
	3	247	154	0.623482			3	280	152	0.542857			3			#DIV/0!				3	301	460	0.654348			3	388	527	0.736243
	4	217	52	0.239631			4	276	20	0.0724638			4			#DIV/0!				4	247	473	0.522199			4	234	519	0.450867
	5	217	13	0.0599078			5	274	19	0.0693431			5			#DIV/0!				5	5	550	0.00909091			5	12	594	0.020202
	6	131	2	0.0152672			6	104	0	0			6			#DIV/0!				6	0	175	0			6	0	242	0
	Total	1330	525	0.394737			Total	1503	530	0.352628			Total	0	0	#DIV/0!				Total	1227	2603	0.471379			Total	1429	2973	0.480659
		Average																			Average
Bins	ctrl1	ctrl2	ctrl3	Average ctrl	Error ctrl														Bins	Pum2 KO1	Pum2 KO2	Pum2 KO3	Average Pum2 KO	Error Pum2 KO	T-test	Stars
1	0.462548	0.540123	0.55906	0.520577	0.0295249														1	0.64286	0.613915	0.603752	0.620176	0.0117157	0.0349976	*
2	0.554348	0.514359	0.622937	0.563881	0.0317042														2	0.875152	0.940539	0.829603	0.881765	0.0321946	0.00215127	**
3	0.3	0.512376	0.583169	0.465182	0.0850818														3	0.647241	0.783843	0.695295	0.708793	0.0400071	0.0606137
4	0.0775914	0.100748	0.156048	0.111462	0.0232733														4	0.299547	0.401381	0.486533	0.39582	0.0540497	0.00844825	**
5	0.00189394	0.0283593	0.0646254	0.0316262	0.0181825														5	0.0211268	0.0192698	0.0146465	0.0183477	0.00192668	0.507917
6	0.0202707	0.00454545	0.00763359	0.0108166	0.00481039														6	0	0	0	0	0	0.0877823
Total	0.257384	0.327843	0.373682	0.319637	0.0338222														Total	0.463095	0.489888	0.476019	0.476334	0.00773603	0.010688	**
