# Supplementary material for: Pum2 and TDP-43 refine area-specific cytoarchitecture post-mitotically and modulate translation of Sox5, Bcl11b, and Rorb mRNAs in developing mouse neocortex
Source: eLife. 2022 Mar 9;11:e55199. doi: 10.7554/eLife.55199 (PMC8906809; doi:10.7554/eLife.55199)
Supplement: Source data 7. — Quantification of fold changes in protein levels of human TDP-43 (hTDP-43) or both mouse and human (m+h) TDP-43 normalized to total protein in nuclear or cytoplasmic fractions from three mice (n1–3) of each genotype (Ctrl, TDP43, or TDP43A315T) (Figure 1—figure supplement 8c). Data are shown as means ± SEM, n = 3 for each genotype. *p≤0.05, **p≤0.01, ***p≤0.001 by one-tailed t-test. [file elife-55199-data7.xlsx]

## Sheet: TDP_43
				hTDP43 cyto								m+H tdp43 nuclear											m+H tdp43 cytoplasmic
		Image Name	Channel	Name	Signal	Total	Area	Bkgnd.	Type			Image Name	Channel	Name	Signal	Total	Area	Bkgnd.	Type	signal-bck			Image Name	Channel	Name	Signal	Total	Area	Bkgnd.	Type	signal-bck
	htdp43 wt1	0000015_01	800	1	893	1370	470	1.02	Signal		nt1	0000015_01	800	21	30.7	358	360	0.909	Signal	29.791		nt1	0000014_01	800	45	2.72	354	403	0.872	Signal	1.848
	htdp43 wt2	0000015_01	800	2	470	934	473	0.981	Signal		nt2	0000015_01	800	22	97.7	477	420	0.903	Signal	96.797		nt2	0000014_01	800	46	4.89	398	462	0.85	Signal	4.04
	htdp43 wt3	0000015_01	800	3	701	1190	516	0.956	Signal		nt3	0000015_01	800	23	39.1	439	440	0.909	Signal	38.191		nt3	0000014_01	800	47	7.78	472	546	0.85	Signal	6.93
	315T1	0000015_01	800	4	945	2000	1128	0.938	Signal		htdp43 wt1	0000015_01	800	24	34.6	387	390	0.903	Signal	33.697		htdp43 wt1	0000014_01	800	48	17	648	742	0.85	Signal	16.15
	315T2	0000015_01	800	5	1350	1870	528	0.981	Signal		htdp43 wt2	0000015_01	800	25	31.4	354	360	0.897	Signal	30.503		htdp43 wt2	0000014_01	800	50	13.5	523	588	0.866	Signal	12.634
	315T3	0000015_01	800	7	2080	2820	765	0.969	Signal		htdp43 wt3	0000015_01	800	26	23.7	369	390	0.884	Signal	22.816		htdp43 wt3	0000014_01	800	51	12.3	355	396	0.866	Signal	11.434
	Total protein stain										315T1	0000015_01	800	27	55	708	738	0.884	Signal	54.116		315T1	0000014_01	800	52	26.3	500	540	0.878	Signal	25.422
	NT1	0000015_01	700	12	3050	18900	616	25.8	Signal		315T2	0000015_01	800	28	55.4	729	756	0.891	Signal	54.509		315T2	0000014_01	800	53	20.7	328	352	0.872	Signal	19.828
	NT2	0000015_01	700	13	4170	19300	528	28.7	Signal		315T3	0000015_01	800	29	40.1	699	756	0.872	Signal	39.228		315T3	0000014_01	800	54	9.74	219	243	0.859	Signal	8.881
	NT3	0000015_01	700	14	4200	21100	616	27.4	Signal		Total protein stain											Total protein stain
	htdp43 wt1	0000015_01	700	15	4080	20300	616	26.4	Signal		NT1	0000015_01	700	30	2490	30500	546	51.4	Signal	2438.6		NT1	0000014_01	700	55	8480	56400	850	56.3	Signal	8423.7
	htdp43 wt2	0000015_01	700	16	3570	18200	616	23.8	Signal		NT2	0000015_01	700	31	6320	25700	546	35.4	Signal	6284.6		NT2	0000014_01	700	58	9520	54000	1050	42.3	Signal	9477.7
	htdp43 wt3	0000015_01	700	17	4060	20900	616	27.4	Signal		NT3	0000015_01	700	32	5650	22700	546	31.3	Signal	5618.7		NT3	0000014_01	700	59	7770	39400	782	40.5	Signal	7729.5
	315T1	0000015_01	700	18	3470	18000	528	27.4	Signal		htdp43 wt1	0000015_01	700	33	4760	21500	546	30.7	Signal	4729.3		htdp43 wt1	0000014_01	700	60	11400	48800	1100	34	Signal	11366
	315T2	0000015_01	700	19	2990	24800	616	35.4	Signal		htdp43 wt2	0000015_01	700	34	3800	21700	546	32.9	Signal	3767.1		htdp43 wt2	0000014_01	700	61	9690	39700	860	34.9	Signal	9655.1
	315T3	0000015_01	700	20	4410	25800	520	41.1	Signal		htdp43 wt3	0000015_01	700	35	856	18100	546	31.6	Signal	824.4		htdp43 wt3	0000014_01	700	62	15400	45200	860	34.7	Signal	15365.3
											315T1	0000015_01	700	36	2110	23000	546	38.2	Signal	2071.8		315T1	0000014_01	700	63	13300	45200	860	37	Signal	13263
		hTDP43/Total protein									315T2	0000015_01	700	37	1040	26700	546	47	Signal	993		315T2	0000014_01	700	64	8800	35100	860	30.6	Signal	8769.4
	htdp43 wt1	0.218873									315T3	0000015_01	700	38	1550	36300	504	68.8	Signal	1481.2		315T3	0000014_01	700	65	4370	23300	600	31.5	Signal	4338.5
	htdp43 wt2	0.131653										m+h TDP43/Total protein											m+ hTDP43/Total protein
	htdp43 wt3	0.17266	Average hTDP43 WT	0.174395							nt1	0.0122164										nt1	0.000219381
	315T1	0.272334	Average 315T	0.398498							nt2	0.0154023										nt2	0.000426264
	315T2	0.451505	error htdp43WT	0.0251932							nt3	0.00679712	Average NT	0.0114719								nt3	0.000896565	Average NT	0.00051407
	315T3	0.471655	error 315T	0.0633496							htdp43 wt1	0.00712516	Average hTDP43WT	0.0142994								htdp43 wt1	0.0014209	Average hTDP43WT	0.00115786
											htdp43 wt2	0.00809721	error NT	0.00251182								htdp43 wt2	0.00130853	error NT	0.000200356
	T-test	0.0302961	0.0151481								htdp43 wt3	0.0276759	error hTDP43WT	0.00669412								htdp43 wt3	0.000744144	error hTDP43WT	0.000209386
			**								315T1	0.0261203										315T1	0.00191676
			1-tail T-test								315T2	0.0548933										315T2	0.00226104
	Fold Change										315T3	0.0264839	Average 315T	0.0358325								315T3	0.00204702	Average 315T	0.00207494
	htdp43 wt1	1.25504											error 315T	0.00953096										error 315T	0.000100362
	htdp43 wt2	0.75491									T-test NT &hTDP43	0.712688	0.356344									T-test NT &hTDP43	0.0904625	0.0452313	*
	htdp43 wt3	0.990051									T-test nt&315T	0.0688322	0.0344161	*								T-test nt&315T	0.0022331	0.00111655	***
	315T1	1.56159									T-test hTDP_43 & 315T	0.138178	0.0690889									T-test hTDP_43 & 315T	0.0168236	0.0084118	**
	315T2	2.58898											1-tail T-test											1-tail T-test
	315T3	2.70452									Fold Change											Fold Change
	Average hTDP43 wt	1									nt1	1.0649										nt1	0.426753
	Avergae 315T	2.28503									nt2	1.3426										nt2	0.829194
	error htdp43WT	0.14446									nt3	0.5925	Average NT	1		Average NT	1					nt3	1.74405	Average NT	1		Average NT	1
	error 315T	0.363253									htdp43 wt1	0.621094	Average hTDP43WT	1.24647		Average hTDP43WT	1.24647					htdp43 wt1	2.76403	Average hTDP43WT	2.25234		Average hTDP43WT	2.25234
											htdp43 wt2	0.705828	error NT	0.218954		Average 315T	3.12349					htdp43 wt2	2.54543	error NT	0.389744		Average 315T	4.0363
											htdp43 wt3	2.41249	error hTDP43WT	0.583521								htdp43 wt3	1.44755	error hTDP43WT	0.40731		error NT	0.142032
											315T1	2.27688				error NT	0.218954					315T1	3.7286				error hTDP43WT	0.148434
											315T2	4.785				error hTDP43WT	0.583521					315T2	4.39832				error 315T	0.0711465
											315T3	2.30858	Average 315T	3.12349		error 315T	0.830806					315T3	3.98199	Average 315T	4.0363
													error 315T	0.830806										error 315T	0.19523
