# Supplementary material for: Pum2 and TDP-43 refine area-specific cytoarchitecture post-mitotically and modulate translation of Sox5, Bcl11b, and Rorb mRNAs in developing mouse neocortex
Source: eLife. 2022 Mar 9;11:e55199. doi: 10.7554/eLife.55199 (PMC8906809; doi:10.7554/eLife.55199)
Supplement: Source data 8. — Quantification of results from n = 3 animals of controls mice (Ctrl) or mice from a transgenic line expressing Prnp-TARDBP (TDP43) shown in six equal-sized bins and the total number of Sox5- or Rorβ- or Bcl11b or DAPI-positive cells (Figure 1—figure supplement 9b). Only high-expressing Bcl11b+ neurons were counted. Data are shown as means ± SEM, n = 3 for each genotype. *p≤0.05, **p≤0.01, ***p≤0.001 by two-tailed t-test. IV, V, VI: layers IV, V, and VI. [file elife-55199-data8.xlsx]

## Sheet: sox5 DAPI
	hTDP-43 N1
		sa1					sa2					sa3					Ctrl N1	sa1					SA2				SA3
	bins	DAPI	Sox5	sox5/DAPI		bins	DAPI	Sox5	sox5/DAPI		bins	DAPI	Sox5	sox5/DAPI			bins	DAPI	Sox5	sox5/DAPI		bins	DAPI	Sox5	sox5/DAPI		bins	DAPI	Sox5	sox5/DAPI
	1	273	205	0.750916		1	242	107	0.442149		1	278	137	0.492806			1	304	173	0.569079		1	234	191	0.816239		1	221	162	0.733032
	2	249	263	1.05622		2	247	189	0.765182		2	257	206	0.801556			2	312	223	0.714744		2	238	241	1.01261		2	203	189	0.931034
	3	247	178	0.720648		3	230	156	0.678261		3	266	172	0.646617			3	309	162	0.524272		3	262	90	0.343511		3	227	111	0.488987
	4	256	62	0.242188		4	238	67	0.281513		4	270	87	0.322222			4	305	14	0.0459016		4	243	0	0		4	211	3	0.014218
	5	224	4	0.0178571		5	245	20	0.0816327		5	275	2	0.00727273			5	288	2	0.00694444		5	244	0	0		5	241	0	0
	6	130	3	0.0230769		6	139	12	0.0863309		6	158	6	0.0379747			6	152	6	0.0394737		6	169	0	0		6	159	0	0
	Total	1379	715	0.518492		Total	1341	551	0.410887		Total	1504	610	0.405585			Total	1670	580	0.347305		Total	1390	522	0.37554		Total	1262	465	0.368463
	hTDP-43 N2																Ctrl N2
	bins	DAPI	Sox5	sox5/DAPI		bins	DAPI	Sox5	sox5/DAPI		bins	DAPI	Sox5	sox5/DAPI			bins	DAPI	Sox5	sox5/DAPI		bins	DAPI	Sox5	sox5/DAPI		bins	dapi	Sox5	sox5/DAPI
	1	349	243	0.696275		1	300	210	0.7		1	314	246	0.783439			1	211	143	0.677725		1	277	145	0.523466		1	228	127	0.557018
	2	344	308	0.895349		2	316	305	0.96519		2	341	275	0.806452			2	205	157	0.765854		2	240	162	0.675		2	233	141	0.60515
	3	325	205	0.630769		3	302	209	0.692053		3	323	204	0.631579			3	226	116	0.513274		3	236	73	0.309322		3	260	91	0.35
	4	311	81	0.26045		4	294	58	0.197279		4	283	71	0.250883			4	206	46	0.223301		4	239	12	0.0502092		4	253	31	0.12253
	5	322	1	0.00310559		5	307	1	0.00325733		5	284	1	0.00352113			5	217	0	0		5	217	0	0		5	250	0	0
	6	193	2	0.0103627		6	198	0	0		6	161	0	0			6	144	1	0.00694444		6	153	0	0		6	127	4	0.0314961
	Total	1844	840	0.455531		Total	1717	783	0.456028		Total	1706	797	0.467175			Total	1209	463	0.382961		Total	1362	392	0.287812		Total	1351	394	0.291636
	hTDP-43 N3																Ctrl N3
	bins	DAPI	Sox5	sox5/DAPI		bins	DAPI	Sox5	sox5/DAPI		bins	DAPI	Sox5	sox5/DAPI			bins	DAPI	Sox5	sox5/DAPI		bins	DAPI	Sox5	sox5/DAPI		bins	DAPI	Sox5	sox5/DAPI
	1	259	167	0.644788		1	263	223	0.847909		1	292	211	0.722603			1	282	196	0.695035		1	284	191	0.672535		1	246	176	0.715447
	2	253	281	1.11067		2	269	315	1.171		2	307	286	0.931596			2	290	161	0.555172		2	286	200	0.699301		2	254	195	0.767717
	3	265	249	0.939623		3	296	229	0.773649		3	270	212	0.785185			3	307	64	0.208469		3	294	109	0.370748		3	272	85	0.3125
	4	287	83	0.289199		4	275	58	0.210909		4	283	67	0.236749			4	276	2	0.00724638		4	281	13	0.0462633		4	260	2	0.00769231
	5	276	6	0.0217391		5	261	8	0.0306513		5	246	1	0.00406504			5	281	0	0		5	278	0	0		5	243	0	0
	6	158	1	0.00632911		6	127	2	0.015748		6	162	6	0.037037			6	161	1	0.00621118		6	172	0	0		6	197	2	0.0101523
	Total	1498	787	0.525367		Total	1491	835	0.560027		Total	1560	783	0.501923			Total	1597	424	0.265498		Total	1595	513	0.32163		Total	1472	460	0.3125
Average	hTDP-43 N1					hTDP-43 N2					hTDP-43 N3						Average ctl1					average ctrl2					average ctrl3
	bins	DAPI	Sox5	sox5/DAPI		bins	DAPI	Sox5	sox5/DAPI		bins	DAPI	Sox5	sox5/DAPI			bins	DAPI	Sox5	sox5/DAPI		bins	DAPI	Sox5	sox5/DAPI		bins	DAPI	Sox5	sox5/DAPI
	1	264.333	149.667	0.566204		1	321	233	0.725857		1	271.333	200.333	0.738329			1	253	175.333	0.693017		1	238.667	138.333	0.579609		1	270.667	187.667	0.69335
	2	251	219.333	0.873838		2	333.667	296	0.887113		2	276.333	294	1.06393			2	251	217.667	0.867198		2	226	153.333	0.678466		2	276.667	185.333	0.66988
	3	247.667	168.667	0.681023		3	316.667	206	0.650526		3	277	230	0.830325			3	266	121	0.454887		3	240.667	93.3333	0.387812		3	291	86	0.295533
	4	254.667	72	0.282723		4	296	70	0.236486		4	281.667	69.3333	0.246154			4	253	5.66667	0.0223979		4	232.667	29.6667	0.127507		4	272.333	5.66667	0.0208078
	5	248	8.66667	0.0349462		5	304.333	1	0.00328587		5	261	5	0.0191571			5	257.667	0.666667	0.00258732		5	228	0	0		5	267.333	0	0
	6	142.333	7	0.0491803		6	184	0.666667	0.00362319		6	149	3	0.0201342			6	160	2	0.0125		6	141.333	1.66667	0.0117925		6	176.667	1	0.00566038
	Total	1408	625.333	0.444129		Total	1755.67	806.667	0.459465		Total	1516.33	801.667	0.528688			Total	1440.67	522.333	0.362564		Total	1307.33	416.333	0.31846		Total	1554.67	465.667	0.299528
	hTDP-43			Average hTDP-43		ctrl			Average ctrl
	bins	DAPI	Sox5	sox5/DAPI		bins	DAPI	Sox5	sox5/DAPI
	1	285.556	194.333	0.680545		1	254.111	167.111	0.65763
	2	287	269.778	0.939992		2	251.222	185.444	0.738169
	3	280.444	201.556	0.7187		3	265.889	100.111	0.376515
	4	277.444	70.4444	0.253905		4	252.667	13.6667	0.0540897
	5	271.111	4.88889	0.0180328		5	251	0.222222	0.000885347
	6	158.444	3.55556	0.0224404		6	159.333	1.55556	0.0097629
	Total	1560	744.556	0.477279		Total	1434.22	468.111	0.326387
	Average ctrl	Average hTDP-43		Average ctrl	Average hTDP-43
	sox5/DAPI ctrl	sox5/DAPI hTDP-43		DAPI ctrl	DAPI hTDP-43
	0.65763	0.680545		254.111	285.556
	0.738169	0.939992		251.222	287
	0.376515	0.7187		265.889	280.444
	0.0540897	0.253905		252.667	277.444
	0.000885347	0.0180328		251	271.111
	0.0097629	0.0224404		159.333	158.444
	0.326387	0.477279		1434.22	1560
	Ctrl 1	Ctrl 2	Ctrl 3		hTDP-43 N1	hTDP-43 N2	hTDP-43 N3		Error Ctrl	Error hTDP_43	T-test
	sox5/DAPI	sox5/DAPI	sox5/DAPI		sox5/DAPI	sox5/DAPI	sox5/DAPI		sox5/DAPI	sox5/DAPI	sox5/DAPI
	0.693017	0.579609	0.69335		0.566204	0.725857	0.738329		0.0378583	0.0554133	0.765029
	0.867198	0.678466	0.66988		0.873838	0.887113	1.06393		0.0643894	0.0612723	0.0843054
	0.454887	0.387812	0.295533		0.681023	0.650526	0.830325		0.0461931	0.0555521	0.0091527	**
	0.0223979	0.127507	0.0208078		0.282723	0.236486	0.246154		0.0353044	0.0140801	0.00644927	**
	0.00258732	0	0		0.0349462	0.00328587	0.0191571		0.000862441	0.00913957	0.117469
	0.0125	0.0117925	0.00566038		0.0491803	0.00362319	0.0201342		0.00217158	0.0133161	0.348108
	0.362564	0.31846	0.299528		0.444129	0.459465	0.528688		0.0186741	0.0260098	0.00928993	**
									Error Ctrl	Error hTDP_43	T-test
	DAPI	DAPI	DAPI		DAPI	DAPI	DAPI		DAPI	DAPI	DAPI
	253	238.667	270.667		264.333	321	271.333		9.25429	17.8371	0.19268
	251	226	276.667		251	333.667	276.333		14.6266	24.4525	0.277584
	266	240.667	291		247.667	316.667	277		14.5301	19.9929	0.587559
	253	232.667	272.333		254.667	296	281.667		11.452	12.1172	0.211435
	257.667	228	267.333		248	304.333	261		11.8337	17.0297	0.387068
	160	141.333	176.667		142.333	184	149		10.2053	12.9219	0.959537
	1440.67	1307.33	1554.67		1408	1755.67	1516.33		71.4717	102.71	0.371685

## Sheet: Ctip2
	hTDP-43 N1
		sa1					sa2					sa3					ctrl N1	sa1					SA2				SA3
	bins	DAPI	ctip2	ctip2/DAPI		bins	DAPI	ctip2	ctip2/DAPI		bins	DAPI	ctip2	ctip2/DAPI			bins	DAPI	ctip2	ctip2/DAPI		bins	DAPI	ctip2	ctip2/DAPI		bins	DAPI	ctip2	ctip2/DAPI
	1	265	22	0.0830189		1	253	57	0.225296		1	264	28	0.106061			1	282	2	0.0070922		1	284	37	0.130282		1	216	0	0
	2	255	51	0.2		2	241	41	0.170124		2	268	31	0.115672			2	290	51	0.175862		2	286	40	0.13986		2	217	6	0.0276498
	3	249	161	0.646586		3	230	90	0.391304		3	283	151	0.533569			3	307	59	0.192182		3	294	103	0.35034		3	220	79	0.359091
	4	261	34	0.130268		4	205	99	0.482927		4	269	35	0.130112			4	276	1	0.00362319		4	281	18	0.0640569		4	206	15	0.0728155
	5	218	0	0		5	195	7	0.0358974		5	279	1	0.00358423			5	281	0	0		5	278	0	0		5	193	0	0
	6	88	2	0.0227273		6	77	4	0.0519481		6	122	8	0.0655738			6	161	0	0		6	172	0	0		6	107	0	0
	Total	1336	270	0.202096		Total	1201	298	0.248127		Total	1485	254	0.171044			Total	1597	113	0.0707577		Total	1595	198	0.124138		Total	1159	100	0.0862813
	hTDP-43 N2																Ctrl N2
	bins	DAPI	ctip2	ctip2/DAPI		bins	DAPI	ctip2	ctip2/DAPI		bins	DAPI	ctip2	ctip2/DAPI			bins	DAPI	ctip2	ctip2/DAPI		bins	DAPI	ctip2	ctip2/DAPI		bins	DAPI	ctip2	ctip2/DAPI
	1	349	42	0.120344		1	300	64	0.213333		1	314	29	0.0923567			1	259	7	0.027027		1	307	6	0.019544		1	228	8	0.0350877
	2	344	25	0.0726744		2	316	45	0.142405		2	341	16	0.0469208			2	227	1	0.00440529		2	282	9	0.0319149		2	233	7	0.0300429
	3	325	126	0.387692		3	302	124	0.410596		3	323	105	0.325077			3	227	78	0.343612		3	268	89	0.33209		3	260	84	0.323077
	4	311	74	0.237942		4	294	63	0.214286		4	283	65	0.229682			4	217	41	0.18894		4	245	8	0.0326531		4	253	40	0.158103
	5	322	1	0.00310559		5	307	0	0		5	284	0	0			5	216	0	0		5	264	1	0.00378788		5	250	1	0.004
	6	193	0	0		6	198	0	0		6	161	1	0.00621118			6	139	0	0		6	121	0	0		6	127	0	0
	Total	1844	268	0.145336		Total	1717	296	0.172394		Total	1706	216	0.126612			Total	1285	127	0.0988327		Total	1487	113	0.0759919		Total	1351	140	0.103627
	hTDP-43 N3																Ctrl N3
	bins	DAPI	ctip2	ctip2/DAPI		bins	DAPI	ctip2	ctip2/DAPI		bins	DAPI	ctip2	ctip2/DAPI			bins	DAPI	ctip2	ctip2/DAPI		bins	DAPI	ctip2	ctip2/DAPI		bins	DAPI	ctip2	ctip2/DAPI
	1	287	47	0.163763		1	295	37	0.125424		1	227	30	0.132159			1	247	10	0.0404858		1	218	10	0.0458716		1	274	15	0.0547445
	2	278	20	0.0719424		2	296	18	0.0608108		2	248	31	0.125			2	242	4	0.0165289		2	209	2	0.00956938		2	243	17	0.0699588
	3	291	128	0.439863		3	278	118	0.42446		3	242	72	0.297521			3	272	78	0.286765		3	235	78	0.331915		3	268	108	0.402985
	4	257	86	0.33463		4	259	89	0.343629		4	248	45	0.181452			4	251	35	0.139442		4	241	31	0.128631		4	245	27	0.110204
	5	241	0	0		5	245	1	0.00408163		5	227	1	0.00440529			5	239	0	0		5	209	0	0		5	264	0	0
	6	121	0	0		6	133	0	0		6	124	1	0.00806452			6	136	0	0		6	78	0	0		6	188	0	0
	Total	1475	281	0.190508		Total	1506	263	0.174635		Total	1316	180	0.136778			Total	1387	127	0.0915645		Total	1190	121	0.101681		Total	1482	167	0.112686
Average	hTDP-43 N1					hTDP-43 N2					hTDP-43 N3						Average ctl1					average ctrl2					average ctrl3
	bins	DAPI	Ctip2	Ctip2/DAPI		bins	DAPI	Ctip2	Ctip2/DAPI		bins	DAPI	Ctip2	Ctip2/DAPI			bins	DAPI	Ctip2	Ctip2/DAPI		bins	DAPI	Ctip2	Ctip2/DAPI		bins	DAPI	Ctip2	Ctip2/DAPI
	1	260.667	35.6667	0.136829		1	321	45	0.140187		1	269.667	38	0.140915			1	260.667	13	0.0498721		1	264.667	7	0.0264484		1	246.333	11.6667	0.0473613
	2	254.667	41	0.160995		2	333.667	28.6667	0.0859141		2	274	23	0.0839416			2	264.333	32.3333	0.12232		2	247.333	5.66667	0.0229111		2	231.333	7.66667	0.0331412
	3	254	134	0.527559		3	316.667	118.333	0.373684		3	270.333	106	0.392109			3	273.667	80.3333	0.293544		3	251.667	83.6667	0.33245		3	258.333	88	0.340645
	4	245	56	0.228571		4	296	67.3333	0.227477		4	254.667	73.3333	0.287958			4	254.333	11.3333	0.0445609		4	238.333	29.6667	0.124476		4	245.667	31	0.126187
	5	230.667	2.66667	0.0115607		5	304.333	0.333333	0.00109529		5	237.667	0.666667	0.00280505			5	250.667	0	0		5	243.333	0.666667	0.00273973		5	237.333	0	0
	6	95.6667	4.66667	0.0487805		6	184	0.333333	0.00181159		6	126	0.333333	0.0026455			6	146.667	0	0		6	129	0	0		6	134	0	0
	Total	1340.67	274	0.204376		Total	1755.67	260	0.148092		Total	1432.33	241.333	0.16849			Total	1450.33	137	0.094461		Total	1374.33	126.667	0.0921659		Total	1353	138.333	0.102242
	V	499	190	0.380762		V	612.667	185.667	0.303047		V	525	179.333	0.341587			V	528	91.6667	0.173611		V	490	113.333	0.231293		V	504	119	0.236111
	hTDP-43			Average hTDP-43		ctrl			Average ctrl
	bins	DAPI	Ctip2	Ctip2/DAPI		bins	DAPI	Ctip2	Ctip2/DAPI
	1	283.778	39.5556	0.139389		1	257.222	10.5556	0.0410367
	2	287.444	30.8889	0.10746		2	247.667	15.2222	0.0614625
	3	280.333	119.444	0.42608		3	261.222	84	0.321565
	4	265.222	65.5556	0.247172		4	246.111	24	0.0975169
	5	257.556	1.22222	0.00474547		5	243.778	0.222222	0.000911577
	6	135.222	1.77778	0.0131471		6	136.556	0	0															Total
	Total	1509.56	258.444	0.171206		Total	1392.56	134	0.096226
	V	545.556	185	0.339104		V	507.333	108	0.212878
	Average ctrl	Average hTDP-43
bins	Ctip2/DAPI	Ctip2/DAPI
1	0.0410367	0.139389
2	0.0614625	0.10746
3	0.321565	0.42608
4	0.0975169	0.247172
5	0.000911577	0.00474547
6	0	0.0131471
Total	0.096226	0.171206
V	0.212878	0.339104
	Ctrl 1	Ctrl 2	Ctrl 3		hTDP-43 N1	hTDP-43 N2	hTDP-43 N3		Error Ctrl	Error hTDP_43	T-test
bins	Ctip2/DAPI	Ctip2/DAPI	Ctip2/DAPI		Ctip2/DAPI	Ctip2/DAPI	Ctip2/DAPI		Ctip2/DAPI	Ctip2/DAPI	Ctip2/DAPI
1	0.0498721	0.0264484	0.0473613		0.136829	0.140187	0.140915		0.00742491	0.00125839	0.000200569	***
2	0.12232	0.0229111	0.0331412		0.160995	0.0859141	0.0839416		0.0315698	0.025362	0.277767
3	0.293544	0.33245	0.340645		0.527559	0.373684	0.392109		0.0145283	0.0485133	0.0979304						Layer V
4	0.0445609	0.124476	0.126187		0.228571	0.227477	0.287958		0.026928	0.0199804	0.0111486	**
5	0	0.00273973	0		0.0115607	0.00109529	0.00280505		0.000913242	0.00324131	0.276422
6	0	0	0		0.0487805	0.00181159	0.0026455		0	0.0155192	0.316625
Total	0.094461	0.0921659	0.102242		0.204376	0.148092	0.16849		0.00304901	0.0164516	0.00985355	**
V	0.173611	0.231293	0.236111		0.380762	0.303047	0.341587		0.0200785	0.0224346	0.0130988	**

## Sheet: rorb
	hTDP-43 N1
		sa1					sa2					sa3					ctrl N1	sa1					SA2				SA3
	bins	DAPI	rorb	rorb/DAPI		bins	DAPI	rorb	rorb/DAPI		bins	DAPI	rorb	rorb/DAPI			bins	DAPI	rorb	rorb/DAPI		bins	DAPI	rorb	rorb/DAPI		bins	DAPI	rorb	rorb/DAPI
	1	264	1	0.00378788		1	253	0	0		1			#DIV/0!			1	221	0	0		1	184	11	0.0597826		1	237	4	0.0168776
	2	268	5	0.0186567		2	241	3	0.0124481		2			#DIV/0!			2	203	36	0.17734		2	201	32	0.159204		2	205	8	0.0390244
	3	283	135	0.477032		3	230	75	0.326087		3			#DIV/0!			3	227	170	0.748899		3	221	168	0.760181		3	237	74	0.312236
	4	269	200	0.743494		4	205	133	0.64878		4			#DIV/0!			4	211	181	0.85782		4	214	164	0.766355		4	221	167	0.755656
	5	279	14	0.0501792		5	195	24	0.123077		5			#DIV/0!			5	241	4	0.0165975		5	226	40	0.176991		5	241	35	0.145228
	6	122	1	0.00819672		6	77	3	0.038961		6			#DIV/0!			6	159	0	0		6	166	11	0.0662651		6	116	6	0.0517241
	Total	1485	356	0.239731		Total	1201	238	0.198168		Total	0	0	#DIV/0!			Total	1262	391	0.309826		Total	1212	426	0.351485		Total	1257	294	0.23389
	hTDP-43 N2																Ctrl N2
	bins	DAPI	rorb	rorb/DAPI		bins	DAPI	rorb	rorb/DAPI		bins	DAPI	rorb	rorb/DAPI			bins	DAPI	rorb	rorb/DAPI		bins	DAPI	rorb	rorb/DAPI		bins	DAPI	rorb	rorb/DAPI
	1	316	4	0.0126582		1	295	3	0.0101695		1			#DIV/0!			1	273	12	0.043956		1	316	6	0.0189873		1			#DIV/0!
	2	321	3	0.00934579		2	287	26	0.0905923		2			#DIV/0!			2	235	30	0.12766		2	295	36	0.122034		2			#DIV/0!
	3	310	56	0.180645		3	265	155	0.584906		3			#DIV/0!			3	249	158	0.634538		3	310	180	0.580645		3			#DIV/0!
	4	280	203	0.725		4	301	212	0.704319		4			#DIV/0!			4	255	234	0.917647		4	328	200	0.609756		4			#DIV/0!
	5	262	40	0.152672		5	273	30	0.10989		5			#DIV/0!			5	248	28	0.112903		5	308	5	0.0162338		5			#DIV/0!
	6	155	0	0		6	149	0	0		6			#DIV/0!			6	116	0	0		6	87	0	0		6			#DIV/0!
	Total	1644	306	0.186131		Total	1570	426	0.271338		Total			#DIV/0!			Total	1376	462	0.335756		Total	1644	427	0.259732		Total			#DIV/0!
	hTDP-43 N3																Ctrl N3
	bins	DAPI	rorb	rorb/DAPI		bins	DAPI	rorb	rorb/DAPI		bins	DAPI	rorb	rorb/DAPI			bins	DAPI	rorb	rorb/DAPI		bins	DAPI	rorb	rorb/DAPI		bins	DAPI	rorb	rorb/DAPI
	1	292	4	0.0136986		1	269	4	0.0148699		1			#DIV/0!			1	252	5	0.0198413		1	197	32	0.162437		1	227	15	0.0660793
	2	307	8	0.0260586		2	242	5	0.0206612		2			#DIV/0!			2	243	26	0.106996		2	186	47	0.252688		2	236	0	0
	3	270	100	0.37037		3	273	113	0.413919		3			#DIV/0!			3	265	110	0.415094		3	212	70	0.330189		3	242	140	0.578512
	4	283	205	0.724382		4	299	207	0.692308		4			#DIV/0!			4	274	227	0.828467		4	210	150	0.714286		4	244	197	0.807377
	5	246	60	0.243902		5	251	65	0.258964		5			#DIV/0!			5	297	47	0.158249		5	201	73	0.363184		5	228	74	0.324561
	6	162	0	0		6	91	0	0		6			#DIV/0!			6	90	1	0.0111111		6	77	0	0		6	120	0	0
	Total	1560	377	0.241667		Total	1425	394	0.276491		Total	0	0	#DIV/0!			Total	1421	416	0.292752		Total	1083	372	0.34349		Total	1297	426	0.32845
Average	hTDP-43 N1					hTDP-43 N2					hTDP-43 N3						Average ctl1					average ctrl2					average ctrl3
	bins	DAPI	rorb	rorb/DAPI		bins	DAPI	rorb	rorb/DAPI		bins	DAPI	rorb	rorb/DAPI			bins	DAPI	rorb	rorb/DAPI		bins	DAPI	rorb	rorb/DAPI		bins	DAPI	rorb	rorb/DAPI
	1	258.5	0.5	0.00193424		1	305.5	3.5	0.0114566		1	280.5	4	0.0142602			1	214	5	0.0233645		1	294.5	9	0.0305603		1	225.333	17.3333	0.0769231
	2	254.5	4	0.0157171		2	304	14.5	0.0476974		2	274.5	6.5	0.0236794			2	203	25.3333	0.124795		2	265	33	0.124528		2	221.667	24.3333	0.109774
	3	256.5	105	0.409357		3	287.5	105.5	0.366957		3	271.5	106.5	0.392265			3	228.333	137.333	0.60146		3	279.5	169	0.604651		3	239.667	106.667	0.445063
	4	237	166.5	0.702532		4	290.5	207.5	0.714286		4	291	206	0.707904			4	215.333	170.667	0.79257		4	291.5	217	0.744425		4	242.667	191.333	0.788462
	5	237	19	0.0801688		5	267.5	35	0.130841		5	248.5	62.5	0.251509			5	236	26.3333	0.111582		5	278	16.5	0.0593525		5	242	64.6667	0.267218
	6	99.5	2	0.0201005		6	152	0	0		6	126.5	0	0			6	147	5.66667	0.0385488		6	101.5	0	0		6	95.6667	0.333333	0.00348432
	Total	1343	297	0.221147		Total	1607	366	0.227754		Total	1492.5	385.5	0.258291			Total	1243.67	370.333	0.297775		Total	1510	444.5	0.294371		Total	1267	404.667	0.31939
	hTDP-43			Average hTDP-43		ctrl			Average ctrl
	bins	DAPI	rorb	rorb/DAPI		bins	DAPI	rorb	rorb/DAPI
	1	281.5	2.66667	0.00947306		1	244.611	10.4444	0.0426982
	2	277.667	8.33333	0.030012		2	229.889	27.5556	0.119865
	3	271.833	105.667	0.388719		3	249.167	137.667	0.552508
	4	272.833	193.333	0.708613		4	249.833	193	0.772515
	5	251	38.8333	0.154714		5	252	35.8333	0.142196
	6	126	0.666667	0.00529101		6	114.722	2	0.0174334
	Total	1480.83	349.5	0.236016		Total	1340.22	406.5	0.303308
	Average ctrl	Average hTDP-43
	rorb/DAPI	rorb/DAPI
	0.0426982	0.00947306
	0.119865	0.030012
	0.552508	0.388719
	0.772515	0.708613
	0.142196	0.154714
	0.0174334	0.00529101
	0.303308	0.236016
	Ctrl 1	Ctrl 2	Ctrl 3		hTDP-43 N1	hTDP-43 N2	hTDP-43 N3		Error Ctrl	Error hTDP_43	T-test
	rorb/DAPI	rorb/DAPI	rorb/DAPI		rorb/DAPI	rorb/DAPI	rorb/DAPI		rorb/DAPI	rorb/DAPI	rorb/DAPI
	0.0233645	0.0305603	0.0769231		0.00193424	0.0114566	0.0142602		0.0167826	0.00373026	0.116004
	0.124795	0.124528	0.109774		0.0157171	0.0476974	0.0236794		0.00496296	0.00961191	0.00110848	***
	0.60146	0.604651	0.445063		0.409357	0.366957	0.392265		0.0526724	0.0123163	0.0409875	*
	0.79257	0.744425	0.788462		0.702532	0.714286	0.707904		0.0154091	0.00339728	0.0132581	**
	0.111582	0.0593525	0.267218		0.0801688	0.130841	0.251509		0.0624314	0.0508188	0.924486
	0.0385488	0	0.00348432		0.0201005	0	0		0.01231	0.00670017	0.629476
	0.297775	0.294371	0.31939		0.221147	0.227754	0.258291		0.00783406	0.0114405	0.00797241	**
