# Supplementary material for: Pum2 and TDP-43 refine area-specific cytoarchitecture post-mitotically and modulate translation of Sox5, Bcl11b, and Rorb mRNAs in developing mouse neocortex
Source: eLife. 2022 Mar 9;11:e55199. doi: 10.7554/eLife.55199 (PMC8906809; doi:10.7554/eLife.55199)
Supplement: Source data 9. — Quantification of retrogradely labeled SCPNs in equal-sized bins for the three genotypes. Analysis of bins 3 and 4 is shown separately and combined (Figure 3c). Data are shown as means ± standard error of the mean (SEM), n = 3 for each genotype. **p≤0.01, ***p≤0.001, two-tailed t-test. Pum2 cKO: Pum2fl/fl; Emx1Cre. [file elife-55199-data9.xlsx]

## Sheet: Sheet1
	P7 ctb 555 pons
	ctrl 1						Pum2 CKO 1												Ctrl 1							hTDP43 A315 T N1
	sa1			sa2			sa1			sa2									sa1			sa2				sa1			sa2
	bins 1-8	SCPN		bins 1-8	SCPN		bins 1-8	SCPN		bins 1-8	SCPN								bins 1-8	SCPN		bins 1-8	SCPN			bins 1-8	SCPN		bins 1-8	SCPN
	3	52		3	54		3	90		3	106								3	33		3	29			3	38		3	106
	4	6		4	9		4	71		4	45								4	12		4	17			4	62		4	53
	total	58		total	63		total	161		total	151								total	45		total	46			total	100		total	159
	ctrl 2						Pum2 CKO 2												Ctrl 2							hTDP43 A315T N2
	sa1			sa2			sa1			sa2									sa1			sa2				sa1			sa2
	bins 1-8	SCPN		bins 1-8	SCPN		bins 1-8	SCPN		bins 1-8	SCPN								bins 1-8	SCPN		bins 1-8	SCPN			bins 1-8	SCPN		bins 1-8	SCPN
	3	38		3	28		3	96		3	90								3	16		3	28			3	34		3	85
	4	8		4	11		4	85		4	100								4	19		4	2			4	69		4	131
	total	46		total	39		total	181		total	190								total	35		total	30			total	103		total	216
	ctrl 3						Pum2 CKO 3												Ctrl 3							hTDP43 A315 N3
	sa1			sa2			sa1			sa2									sa1			sa2				sa1			sa2
	bins 1-8	SCPN		bins 1-8	SCPN		bins 1-8	SCPN		bins 1-8	SCPN								bins 1-8	SCPN		bins 1-8	SCPN			bins 1-8	SCPN		bins 1-8	SCPN
	3	55		3	20		3	133		3	120								3	29		3	30			3	38		3	84
	4	13		4	10		4	95		4	70								4	16		4	9			4	68		4	60
	total	68		total	30		total	228		total	190								total	45		total	39			total	106		total	144
	Average ctrl1			Average ctrl2			Average ctrl3			average ctrl		stdev ctrl	std error ctrl						Average ctrl1			Average ctrl2			Average ctrl3			average ctrl		stdev ctrl	std error ctrl
	bins 1-8	SCPN		bins 1-8	SCPN		bins 1-8	SCPN		bins 1-8	SCPN ctrl								bins 1-8	SCPN		bins 1-8	SCPN		bins 1-8	SCPN		bins 1-8	SCPN ctrl
	3	53		3	33		3	37.5		3	41.1667	10.4921	6.05759						3	31		3	22		3	29.5		3	27.5	4.82183	2.78388
	4	7.5		4	9.5		4	11.5		4	9.5	2	1.1547						4	14.5		4	10.5		4	12.5		4	12.5	2	1.1547
	total	60.5		total	42.5		total	49		total	50.6667	9.11501	5.26255						total	45.5		total	32.5		total	42		total	40	6.72681	3.88373
	Average Pum2 cko 1			Average Pum2 cko2			Average Pum2 cko 3			Average Pum2 cko		stdev Pum2 CKO	std error CKO						Average hTDP43 AhTDP43 A315T1			Average hTDP43 AhTDP43 A315T2			Average hTDP43 AhTDP43 A315T3			Average hTDP43 A315T		stdev hTDP43 A315T	std hTDP43 A315T
	bins 1-8	SCPN		bins 1-8	SCPN		bins 1-8	SCPN		bins 1-8	SCPN Pum2 cko								bins 1-8	SCPN		bins 1-8	SCPN		bins 1-8	SCPN		bins 1-8	SCPN hTDP43 A315T
	3	98		3	93		3	126.5		3	105.833	18.0716	10.4337						3	72		3	59.5		3	61		3	64.1667	6.8252	3.94053
	4	58		4	92.5		4	82.5		4	77.6667	17.7506	10.2483						4	57.5		4	100		4	64		4	73.8333	22.8929	13.2172
	total	156		total	185.5		total	209		total	183.5	26.5565	15.3324						total	129.5		total	159.5		total	125		total	138	18.755	10.8282
																				ctrl1	ctrl2	ctrl3			hTDP43 A315T N1	hTDP43 A315T N2	hTDP43 A315T N3		T-test hTDP43 AhTDP43 A315T
	ctrl1	ctrl2	ctrl3		Pum2 cko1	Pum2 cko2	Pum2 cko3						T-test pum2 cko							SCPN	SCPN	SCPN			SCPN	SCPN	SCPN
	SCPN	SCPN	SCPN		SCPN	SCPN	SCPN												Bin3	31	22	29.5			72	59.5	61		0.00160846	***
Bin3	53	33	37.5		98	93	126.5						0.00584626	**					Bin4	14.5	10.5	12.5			57.5	100	64		0.00986027	**
Bin4	7.5	9.5	11.5		58	92.5	82.5						0.00271582	**					Total	45.5	32.5	42			129.5	159.5	125		0.00104162	***
Total	60.5	42.5	49		156	185.5	209						0.00120828	***
																							Error	Error
	bins	SCPN ctrl	SCPN Pum2 cko		error ctrl	error pum2cko												bins	SCPN ctrl	SCPN hTDP43 A315T		bins	SCPN ctrl	SCPN hTDP43 A315T
	3	41.1667	105.833		6.05759	10.4337												3	27.5	64.1667		3	2.78388	3.94053
	4	9.5	77.6667		1.1547	10.2483												4	12.5	73.8333		4	1.1547	13.2172
	total	50.6667	183.5		5.26255	15.3324												total	40	138		total	3.88373	10.8282
		bin 3	bin 4	Total
	SCPN ctrl	41.1667	9.5	50.6667
	SCPN Pum2 cko	105.833	77.6667	183.5
		Total SCPN	Error
	SCPN ctrl	50.6667	5.26255
	SCPN Pum2 cko	183.5	15.3324
