# Supplementary material for: Pum2 and TDP-43 refine area-specific cytoarchitecture post-mitotically and modulate translation of Sox5, Bcl11b, and Rorb mRNAs in developing mouse neocortex
Source: eLife. 2022 Mar 9;11:e55199. doi: 10.7554/eLife.55199 (PMC8906809; doi:10.7554/eLife.55199)
Supplement: Source data 10. — Quantification of results from n = 3 brains of controls (Ctrl), Pum2 cKO, or hTARDBPA315T (TDP43A315T) in the prospective somatosensory area (pS) for Sox5 and Bcl11b colocalization across six equal-sized bins (Figure 4a). Data are shown as means ± standard error of the mean (SEM), n = 3 for each genotype. *p≤0.05, **p≤0.01, two-tailed t-test. Pum2 cKO: Pum2fl/fl; Emx1Cre. [file elife-55199-data10.xlsx]

## Sheet: 315T
																													315T
	Ctrl N1 SA1									Ctrl N1 SA2																			315T N1 SA1									315T N1 SA2
	Bins	sox5	ctip2	dapi	S+c+	S/DAPI	C/DAPI	S+C+/DAPI		Bins	sox5	ctip2	dapi	S+c+	S/DAPI	C/DAPI	S+C+/DAPI		Bins	sox5	ctip2	dapi	S+c+	S/DAPI	C/DAPI	S+C+/DAPI			Bins	sox5	ctip2	dapi	S+c+	S/DAPI	C/DAPI	S+C+/DAPI		Bins	sox5	ctip2	dapi	S+c+	S/DAPI	C/DAPI	S+C+/DAPI		Bins	sox5	ctip2
	1	75	12	143	8	0.524476	0.0839161	0.0559441		1	76	0	130	0	0.584615	0	0		1					#DIV/0!	#DIV/0!	#DIV/0!			1	97	15	179	11	0.541899	0.0837989	0.0614525		1	88	18	161	16	0.546584	0.111801	0.0993789		1
	2	70	13	160	8	0.4375	0.08125	0.05		2	67	8	110	7	0.609091	0.0727273	0.0636364		2					#DIV/0!	#DIV/0!	#DIV/0!			2	141	37	191	36	0.73822	0.193717	0.188482		2	93	20	164	15	0.567073	0.121951	0.0914634		2
	3	37	45	161	27	0.229814	0.279503	0.167702		3	43	33	136	14	0.316176	0.242647	0.102941		3					#DIV/0!	#DIV/0!	#DIV/0!			3	111	55	194	44	0.572165	0.283505	0.226804		3	79	25	157	15	0.503185	0.159236	0.0955414		3
	4	18	18	189	14	0.0952381	0.0952381	0.0740741		4	30	22	164	22	0.182927	0.134146	0.134146		4					#DIV/0!	#DIV/0!	#DIV/0!			4	49	31	179	26	0.273743	0.173184	0.145251		4	84	71	191	63	0.439791	0.371728	0.329843		4
	5	3	1	218	0	0.0137615	0.00458716	0		5	5	1	216	0	0.0231481	0.00462963	0		5					#DIV/0!	#DIV/0!	#DIV/0!			5	6	7	220	0	0.0272727	0.0318182	0		5	4	8	212		0.0188679	0.0377358	0		5
	6	2	2	27	0	0.0740741	0.0740741	0		6	6	1	45	1	0.133333	0.0222222	0.0222222		6					#DIV/0!	#DIV/0!	#DIV/0!			6	6	2	91	0	0.0659341	0.021978	0		6	5	4	78	1	0.0641026	0.0512821	0.0128205		6
	Total	205	91	898	57	0.228285	0.101336	0.0634744		Total	227	65	801	44	0.283396	0.0811486	0.0549313		Total	0	0	0	0	#DIV/0!	#DIV/0!	#DIV/0!			Total	410	147	1054	117	0.388994	0.139469	0.111006		Total	353	146	963	110	0.366563	0.15161	0.114226		Total	0	0
	Ctrl N2 SA1									Ctrl N2 SA2																			315T N2 SA1									315T N2 SA2
	Bins	sox5	ctip2	dapi	S+c+	S/DAPI	C/DAPI	S+C+/DAPI		Bins	sox5	ctip2	dapi	S+c+	S/DAPI	C/DAPI	S+C+/DAPI		Bins	sox5	ctip2	dapi	S+c+	S/DAPI	C/DAPI	S+C+/DAPI			Bins	sox5	ctip2	dapi	S+c+	S/DAPI	C/DAPI	S+C+/DAPI		Bins	sox5	ctip2	dapi	S+c+	S/DAPI	C/DAPI	S+C+/DAPI		Bins	sox5	ctip2
	1	63	3	152	3	0.414474	0.0197368	0.0197368		1	66	1	110	0	0.6	0.00909091	0		1					#DIV/0!	#DIV/0!	#DIV/0!			1	71	15	155	15	0.458065	0.0967742	0.0967742		1	86	20	145	20	0.593103	0.137931	0.137931		1
	2	78	12	168	10	0.464286	0.0714286	0.0595238		2	92	5	134	6	0.686567	0.0373134	0.0447761		2					#DIV/0!	#DIV/0!	#DIV/0!			2	106	15	192	15	0.552083	0.078125	0.078125		2	84	19	156	13	0.538462	0.121795	0.0833333		2
	3	55	56	179	41	0.307263	0.312849	0.22905		3	58	41	141	29	0.411348	0.29078	0.205674		3					#DIV/0!	#DIV/0!	#DIV/0!			3	106	46	199	35	0.532663	0.231156	0.175879		3	89	24	171	20	0.520468	0.140351	0.116959		3
	4	13	16	206	7	0.0631068	0.0776699	0.0339806		4	3	6	158	3	0.0189873	0.0379747	0.0189873		4					#DIV/0!	#DIV/0!	#DIV/0!			4	65	58	213	40	0.305164	0.2723	0.187793		4	71	65	187	53	0.379679	0.347594	0.283422		4
	5	5	11	239	0	0.0209205	0.0460251	0		5	3	4	208	0	0.0144231	0.0192308	0		5					#DIV/0!	#DIV/0!	#DIV/0!			5	1	3	224	0	0.00446429	0.0133929	0		5	8	15	199	7	0.040201	0.0753769	0.0351759		5
	6	2	13	28	0	0.0714286	0.464286	0		6	3	4	33	1	0.0909091	0.121212	0.030303		6					#DIV/0!	#DIV/0!	#DIV/0!			6	0	8	76	0	0	0.105263	0		6	2	4	80	0	0.025	0.05	0		6
	Total	216	111	972	61	0.222222	0.114198	0.0627572		Total	225	61	784	39	0.28699	0.0778061	0.0497449		Total	0	0	0	0	#DIV/0!	#DIV/0!	#DIV/0!			Total	349	145	1059	105	0.329556	0.136922	0.0991501		Total	340	147	938	113	0.362473	0.156716	0.120469		Total	0	0
	Ctrl N3 SA1									Ctrl N3 SA2																			315T N3 SA1									315T N3 SA2
	Bins	sox5	ctip2	dapi	S+c+	S/DAPI	C/DAPI	S+C+/DAPI		Bins	sox5	ctip2	dapi	S+c+	S/DAPI	C/DAPI	S+C+/DAPI		Bins	sox5	ctip2	dapi	S+c+	S/DAPI	C/DAPI	S+C+/DAPI			Bins	sox5	ctip2	dapi	S+c+	S/DAPI	C/DAPI	S+C+/DAPI		Bins	sox5	ctip2	dapi	S+c+	S/DAPI	C/DAPI	S+C+/DAPI		Bins	sox5	ctip2
	1	74	15	142	14	0.521127	0.105634	0.0985915		1	85	14	143	5	0.594406	0.0979021	0.034965		1					#DIV/0!	#DIV/0!	#DIV/0!			1	113	10	158	3	0.71519	0.0632911	0.0189873		1	92	15	158	10	0.582278	0.0949367	0.0632911		1
	2	85	5	167	3	0.508982	0.0299401	0.0179641		2	69	15	133	15	0.518797	0.112782	0.112782		2					#DIV/0!	#DIV/0!	#DIV/0!			2	121	15	175	13	0.691429	0.0857143	0.0742857		2	121	28	186	11	0.650538	0.150538	0.0591398		2
	3	58	36	149	25	0.389262	0.241611	0.167785		3	57	49	161	43	0.354037	0.304348	0.267081		3					#DIV/0!	#DIV/0!	#DIV/0!			3	79	44	173	36	0.456647	0.254335	0.208092		3	82	53	190	34	0.431579	0.278947	0.178947		3
	4	10	13	194	4	0.0515464	0.0670103	0.0206186		4	15	18	171	12	0.0877193	0.105263	0.0701754		4					#DIV/0!	#DIV/0!	#DIV/0!			4	31	25	187	19	0.165775	0.13369	0.101604		4	64	62	220	54	0.290909	0.281818	0.245455		4
	5	10	17	239	4	0.041841	0.0711297	0.0167364		5	0	4	217	0	0	0.0184332	0		5					#DIV/0!	#DIV/0!	#DIV/0!			5	4	5	230	0	0.0173913	0.0217391	0		5	6	7	248	0	0.0241935	0.0282258	0		5
	6	4	25	68	2	0.0588235	0.367647	0.0294118		6	3	6	31	0	0.0967742	0.193548	0		6					#DIV/0!	#DIV/0!	#DIV/0!			6	4	10	73	0	0.0547945	0.136986	0		6	8	16	67	2	0.119403	0.238806	0.0298507		6
	Total	241	111	959	52	0.251303	0.115746	0.0542231		Total	229	106	856	75	0.267523	0.123832	0.0876168		Total	0	0	0	0	#DIV/0!	#DIV/0!	#DIV/0!			Total	352	109	996	71	0.353414	0.109438	0.0712851		Total	373	181	1069	111	0.348924	0.169317	0.103835		Total	0	0
	Average Ctrl1									Average Ctrl 2									Average Ctrl 3										Average 315T1									Average 315T2									Average 315T3
	Bins	sox5	ctip2	dapi	S+c+	S/DAPI	C/DAPI	S+C+/DAPI		Bins	sox5	ctip2	dapi	S+c+	S/DAPI	C/DAPI	S+C+/DAPI		Bins	sox5	ctip2	dapi	S+c+	S/DAPI	C/DAPI	S+C+/DAPI			Bins	sox5	ctip2	dapi	S+c+	S/DAPI	C/DAPI	S+C+/DAPI		Bins	sox5	ctip2	dapi	S+c+	S/DAPI	C/DAPI	S+C+/DAPI		Bins	sox5	ctip2
	1	75.5	6	136.5	4	0.553114	0.043956	0.029304		1	64.5	2	131	1.5	0.492366	0.0152672	0.0114504		1	79.5	14.5	142.5	9.5	0.557895	0.101754	0.0666667			1	92.5	16.5	170	13.5	0.544118	0.0970588	0.0794118		1	78.5	17.5	150	17.5	0.523333	0.116667	0.116667		1	102.5	12.5
	2	68.5	10.5	135	7.5	0.507407	0.0777778	0.0555556		2	85	8.5	151	8	0.562914	0.0562914	0.0529801		2	77	10	150	9	0.513333	0.0666667	0.06			2	117	28.5	177.5	25.5	0.659155	0.160563	0.143662		2	95	17	174	14	0.545977	0.0977011	0.0804598		2	121	21.5
	3	40	39	148.5	20.5	0.26936	0.262626	0.138047		3	56.5	48.5	160	35	0.353125	0.303125	0.21875		3	57.5	42.5	155	34	0.370968	0.274194	0.219355			3	95	40	175.5	29.5	0.541311	0.22792	0.168091		3	97.5	35	185	27.5	0.527027	0.189189	0.148649		3	80.5	48.5
	4	24	20	176.5	18	0.135977	0.113314	0.101983		4	8	11	182	5	0.043956	0.0604396	0.0274725		4	12.5	15.5	182.5	8	0.0684932	0.0849315	0.0438356			4	66.5	51	185	44.5	0.359459	0.275676	0.240541		4	68	61.5	200	46.5	0.34	0.3075	0.2325		4	47.5	43.5
	5	4	1	217	0	0.0184332	0.00460829	0		5	4	7.5	223.5	0	0.0178971	0.033557	0		5	5	10.5	228	2	0.0219298	0.0460526	0.00877193			5	5	7.5	216	0	0.0231481	0.0347222	0		5	4.5	9	211.5	3.5	0.0212766	0.0425532	0.0165485		5	5	6
	6	4	1.5	36	0.5	0.111111	0.0416667	0.0138889		6	2.5	8.5	30.5	0.5	0.0819672	0.278689	0.0163934		6	3.5	15.5	49.5	1	0.0707071	0.313131	0.020202			6	5.5	3	84.5	0.5	0.0650888	0.035503	0.00591716		6	1	6	78	0	0.0128205	0.0769231	0		6	6	13
	Total	216	78	849.5	50.5	0.254267	0.0918187	0.0594467		Total	220.5	86	878	50	0.251139	0.0979499	0.0569476		Total	235	108.5	907.5	63.5	0.258953	0.119559	0.0699725			Total	381.5	146.5	1008.5	113.5	0.378285	0.145265	0.112543		Total	344.5	146	998.5	109	0.345018	0.146219	0.109164		Total	362.5	145
	Average WT																												Average 315T
	Bins	sox5	ctip2	dapi	S+c+	S/DAPI	C/DAPI	S+C+/DAPI																					Bins	sox5	ctip2	dapi	S+c+	S/DAPI	C/DAPI	S+C+/DAPI
	1	73.1667	7.5	136.667	5	0.535366	0.054878	0.0365854																					1	91.1667	15.5	159.333	12.5	0.572176	0.0972803	0.0784519
	2	76.8333	9.66667	145.333	8.16667	0.52867	0.0665138	0.0561927																					2	111	22.3333	177.333	17.1667	0.62594	0.12594	0.0968045
	3	51.3333	43.3333	154.5	29.8333	0.332255	0.280475	0.193096																					3	91	41.1667	180.667	30.6667	0.50369	0.22786	0.169742
	4	14.8333	15.5	180.333	10.3333	0.0822551	0.0859519	0.0573013																					4	60.6667	52	196.167	42.5	0.309261	0.265081	0.216653
	5	4.33333	6.33333	222.833	0.666667	0.0194465	0.0284218	0.00299177																					5	4.83333	7.5	222.167	1.16667	0.0217554	0.0337584	0.00525131
	6	3.33333	8.5	38.6667	0.666667	0.0862069	0.219828	0.0172414																					6	4.16667	7.33333	77.5	0.5	0.0537634	0.0946237	0.00645161
	Total	223.833	90.8333	878.333	54.6667	0.254839	0.103416	0.0622391																					Total	362.833	145.833	1013.17	104.5	0.358118	0.143938	0.103142
		Ctrl1	Ctrl 2	Ctrl3	315TN1	315TN2	315TN3
	Bins	S+C+/DAPI	S+C+/DAPI	S+C+/DAPI	S+C+/DAPI	S+C+/DAPI	S+C+/DAPI
	1	0.029304	0.0114504	0.0666667	0.0794118	0.116667	0.0411392
	2	0.0555556	0.0529801	0.06	0.143662	0.0804598	0.066482
	3	0.138047	0.21875	0.219355	0.168091	0.148649	0.192837
	4	0.101983	0.0274725	0.0438356	0.240541	0.2325	0.179361
	5	0	0	0.00877193	0	0.0165485	0
	6	0.0138889	0.0163934	0.020202	0.00591716	0	0.0142857
	Total	0.0594467	0.0569476	0.0699725	0.112543	0.109164	0.0881356
	Bins	std error wt	std error 315T	T-test
	1	0.0162678	0.0218035	0.186945
	2	0.00205026	0.0237424	0.162931
	3	0.0270023	0.0127868	0.498875
	4	0.0226086	0.0191939	0.00574953	**
	5	0.00292398	0.00551615	0.6993
	6	0.00183536	0.00414412	0.0899042
	Total	0.00399084	0.00763524	0.00879241	**
[truncated: 5 more columns]

## Sheet: CKO
	CTrl N1 SA1										SA2								SA3										CKO N1
																														SA1								SA2									SA3
	Bins	sox5	ctip2	dapi	S+c+	S/DAPI	C/DAPI	S+C+/DAPI		Bins	sox5	ctip2	dapi	S+c+	S/DAPI	C/DAPI	S+C+/DAPI		Bins	sox5	ctip2	dapi	S+c+	S/DAPI	C/DAPI	S+C+/DAPI			Bins	sox5	ctip2	dapi	S+c+	S/DAPI	C/DAPI	S+C+/DAPI		Bins	sox5	ctip2	dapi	S+c+	S/DAPI	C/DAPI	S+C+/DAPI		Bins	sox5	ctip2
	1	80	5	105	1	0.761905	0.047619	0.00952381		1	89	0	125	0	0.712	0	0		1	113	3	146	2	0.773973	0.0205479	0.0136986			1	65	31	144	27	0.451389	0.215278	0.1875		1	138	59	187	50	0.737968	0.315508	0.26738		1	95	19
	2	59	10	109	2	0.541284	0.0917431	0.0183486		2	71	11	106	9	0.669811	0.103774	0.0849057		2	95	16	140	13	0.678571	0.114286	0.0928571			2	85	21	167	19	0.508982	0.125749	0.113772		2	127	54	177	46	0.717514	0.305085	0.259887		2	134	4
	3	43	49	121	30	0.355372	0.404959	0.247934		3	53	41	132	38	0.401515	0.310606	0.287879		3	75	41	155	35	0.483871	0.264516	0.225806			3	59	19	169	14	0.349112	0.112426	0.0828402		3	123	81	207	71	0.594203	0.391304	0.342995		3	106	38
	4	34	34	158	15	0.21519	0.21519	0.0949367		4	40	21	155	20	0.258065	0.135484	0.129032		4	37	12	189	10	0.195767	0.0634921	0.0529101			4	64	74	200	57	0.32	0.37	0.285		4	70	52	227	31	0.30837	0.229075	0.136564		4	66	52
	5	4	0	195	0	0.0205128	0	0		5	10	1	221	0	0.0452489	0.00452489	0		5	30	5	230	0	0.130435	0.0217391	0			5	8	6	222	2	0.036036	0.027027	0.00900901		5	44	9	267	0	0.164794	0.0337079	0		5	33	16
	6	15	7	59	0	0.254237	0.118644	0		6	6	1	49	0	0.122449	0.0204082	0		6	15	10	41	1	0.365854	0.243902	0.0243902			6	15	2	96	0	0.15625	0.0208333	0		6	15	20	65	0	0.230769	0.307692	0		6	22	10
	Total	235	105	747	48	0.314592	0.140562	0.064257		Total	269	75	788	67	0.341371	0.0951777	0.0850254		Total	365	87	901	61	0.405105	0.0965594	0.0677026			Total	296	153	998	119	0.296593	0.153307	0.119238		Total	517	275	1130	198	0.457522	0.243363	0.175221		Total	456	139
	Ctrl N2 SA1									SA2									SA3										CKO N2	SA1								SA2									SA3
	Bins	sox5	ctip2	dapi	S+c+	S/DAPI	C/DAPI	S+C+/DAPI		Bins	sox5	ctip2	dapi	S+c+	S/DAPI	C/DAPI	S+C+/DAPI		Bins	sox5	ctip2	dapi	S+c+	S/DAPI	C/DAPI	S+C+/DAPI			Bins	sox5	ctip2	dapi	S+c+	S/DAPI	C/DAPI	S+C+/DAPI		Bins	sox5	ctip2	dapi	S+c+	S/DAPI	C/DAPI	S+C+/DAPI		Bins	sox5	ctip2
	1	88	3	189	2	0.465608	0.015873	0.010582		1	83	19	171	14	0.48538	0.111111	0.0818713		1	56	8	103	6	0.543689	0.0776699	0.0582524			1	115	35	194	27	0.592784	0.180412	0.139175		1	149	62	260	56	0.573077	0.238462	0.215385		1	142	76
	2	83	18	156	10	0.532051	0.115385	0.0641026		2	115	11	187	11	0.614973	0.0588235	0.0588235		2	98	8	118	6	0.830508	0.0677966	0.0508475			2	161	27	212	21	0.759434	0.127358	0.0990566		2	166	54	299	49	0.555184	0.180602	0.16388		2	166	48
	3	65	66	200	42	0.325	0.33	0.21		3	100	63	200	43	0.5	0.315	0.215		3	86	33	132	26	0.651515	0.25	0.19697			3	157	50	189	37	0.830688	0.26455	0.195767		3	144	60	286	45	0.503497	0.20979	0.157343		3	159	59
	4	24	32	235	18	0.102128	0.13617	0.0765957		4	38	44	238	25	0.159664	0.184874	0.105042		4	19	19	179	15	0.106145	0.106145	0.0837989			4	135	59	204	39	0.661765	0.289216	0.191176		4	138	80	312	58	0.442308	0.25641	0.185897		4	94	102
	5	8	8	255	0	0.0313725	0.0313725	0		5	4	7	286	0	0.013986	0.0244755	0		5	6	2	203	0	0.0295567	0.00985222	0			5	42	17	257	0	0.163424	0.0661479	0		5	46	15	338	1	0.136095	0.0443787	0.00295858		5	56	17
	6	14	24	47	3	0.297872	0.510638	0.0638298		6	4	14	78	0	0.0512821	0.179487	0		6	12	5	51	1	0.235294	0.0980392	0.0196078			6	36	16	90	1	0.4	0.177778	0.0111111		6	38	22	71	1	0.535211	0.309859	0.0140845		6	21	19
	Total	282	151	1082	75	0.260628	0.139556	0.0693161		Total	344	158	1160	93	0.296552	0.136207	0.0801724		Total	277	75	786	54	0.352417	0.0954198	0.0687023			Total	646	204	1146	125	0.5637	0.17801	0.109075		Total	681	293	1566	210	0.434866	0.187101	0.1341		Total	638	321
	Ctrl N3 SA1									SA2																			CKO N3	SA1								SA2
	Bins	sox5	ctip2	dapi	S+c+	S/DAPI	C/DAPI	S+C+/DAPI		Bins	sox5	ctip2	dapi	S+c+	S/DAPI	C/DAPI	S+C+/DAPI		Bins	sox5	ctip2	dapi	S+c+	S/DAPI	C/DAPI	S+C+/DAPI			Bins	sox5	ctip2	dapi	S+c+	S/DAPI	C/DAPI	S+C+/DAPI		Bins	sox5	ctip2	dapi	S+c+	S/DAPI	C/DAPI	S+C+/DAPI		Bins	sox5	ctip2
	1	66	6	131	4	0.503817	0.0458015	0.0305344		1	87	33	143	33	0.608392	0.230769	0.230769		1					#DIV/0!	#DIV/0!	#DIV/0!			1	138	60	206	42	0.669903	0.291262	0.203883		1	130	23	171	10	0.760234	0.134503	0.0584795		1
	2	109	15	142	10	0.767606	0.105634	0.0704225		2	91	28	140	18	0.65	0.2	0.128571		2					#DIV/0!	#DIV/0!	#DIV/0!			2	144	62	214	59	0.672897	0.28972	0.275701		2	138	60	199	45	0.693467	0.301508	0.226131		2
	3	64	38	127	23	0.503937	0.299213	0.181102		3	52	41	126	28	0.412698	0.325397	0.222222		3					#DIV/0!	#DIV/0!	#DIV/0!			3	134	83	225	71	0.595556	0.368889	0.315556		3	123	82	203	52	0.605911	0.403941	0.256158		3
	4	6	10	138	0	0.0434783	0.0724638	0		4	2	16	161	2	0.0124224	0.0993789	0.0124224		4					#DIV/0!	#DIV/0!	#DIV/0!			4	88	68	252	47	0.349206	0.269841	0.186508		4	78	60	201	27	0.38806	0.298507	0.134328		4
	5	18	15	194	1	0.0927835	0.0773196	0.00515464		5	2	10	212	1	0.00943396	0.0471698	0.00471698		5					#DIV/0!	#DIV/0!	#DIV/0!			5	48	16	346	2	0.138728	0.0462428	0.00578035		5	56	11	251	2	0.223108	0.0438247	0.00796813		5
	6	20	18	83	3	0.240964	0.216867	0.0361446		6	3	6	91	0	0.032967	0.0659341	0		6					#DIV/0!	#DIV/0!	#DIV/0!			6	18	19	62	0	0.290323	0.306452	0		6	19	13	46	2	0.413043	0.282609	0.0434783		6
	Total	283	102	815	41	0.347239	0.125153	0.0503067		Total	237	134	873	82	0.271478	0.153494	0.093929		Total	0	0	0	0	#DIV/0!	#DIV/0!	#DIV/0!			Total	570	308	1305	221	0.436782	0.236015	0.169349		Total	544	249	1071	138	0.507937	0.232493	0.128852		Total	0	0
	Average Ctrl N1									Average Ctrl N2									Average Ctrl N3										Average CKO1									Average CKO2									Average CKO3
	Bins	sox5	ctip2	dapi	S+c+	S/DAPI	C/DAPI	S+C+/DAPI		Bins	sox5	ctip2	dapi	S+c+	S/DAPI	C/DAPI	S+C+/DAPI		Bins	sox5	ctip2	dapi	S+c+	S/DAPI	C/DAPI	S+C+/DAPI			Bins	sox5	ctip2	dapi	S+c+	S/DAPI	C/DAPI	S+C+/DAPI		Bins	sox5	ctip2	dapi	S+c+	S/DAPI	C/DAPI	S+C+/DAPI		Bins	sox5	ctip2
	1	94	2.66667	125.333	1	0.75	0.0212766	0.00797872		1	75.6667	10	154.333	7.33333	0.490281	0.0647948	0.0475162		1	76.5	19.5	137	18.5	0.558394	0.142336	0.135036			1	99.3333	36.3333	158	36.3333	0.628692	0.229958	0.229958		1	135.333	57.6667	221.667	51	0.610526	0.26015	0.230075		1	134	41.5
	2	75	12.3333	118.333	8	0.633803	0.104225	0.0676056		2	98.6667	12.3333	153.667	9	0.642082	0.0802603	0.0585683		2	100	21.5	141	14	0.70922	0.152482	0.0992908			2	115.333	26.3333	173	42.3333	0.666667	0.152216	0.244701		2	164.333	43	270.667	38.3333	0.607143	0.158867	0.141626		2	141	61
	3	57	43.6667	136	34.3333	0.419118	0.321078	0.252451		3	83.6667	54	177.333	37	0.471805	0.304511	0.208647		3	58	39.5	126.5	25.5	0.458498	0.312253	0.201581			3	96	46	181	38.3333	0.530387	0.254144	0.211786		3	153.333	56.3333	251.667	45	0.609272	0.223841	0.178808		3	128.5	82.5
	4	37	22.3333	167.333	15	0.221116	0.133466	0.0896414		4	27	31.6667	217.333	19.3333	0.124233	0.145706	0.0889571		4	4	13	149.5	1	0.0267559	0.0869565	0.00668896			4	66.6667	59.3333	203.333	41.6667	0.327869	0.291803	0.204918		4	122.333	80.3333	258.667	58	0.472938	0.310567	0.224227		4	83	64
	5	14.6667	2	215.333	0	0.0681115	0.00928793	0		5	6	5.66667	248	0	0.0241935	0.0228495	0		5	10	12.5	203	1	0.0492611	0.0615764	0.00492611			5	28.3333	10.3333	237.667	0.666667	0.119215	0.0434783	0.00280505		5	48	16.3333	292.333	1.33333	0.164196	0.0558723	0.004561		5	52	13.5
	6	12	6	49.6667	0.333333	0.241611	0.120805	0.00671141		6	10	14.3333	58.6667	1.33333	0.170455	0.244318	0.0227273		6	11.5	12	87	1.5	0.132184	0.137931	0.0172414			6	17.3333	10.6667	81.6667	1.66667	0.212245	0.130612	0.0204082		6	31.6667	19	74.3333	1	0.426009	0.255605	0.0134529		6	18.5	16
	Total	289.667	89	812	58.6667	0.356732	0.109606	0.0722496		Total	301	128	1009.33	74	0.298217	0.126816	0.0733157		Total	260	118	844	61.5	0.308057	0.13981	0.0728673			Total	423	189	1034.67	161	0.408827	0.182668	0.155606		Total	655	272.667	1369.33	194.667	0.478335	0.199124	0.142162		Total	557	278.5
	Average WT																												Average CKO
	Bins	sox5	ctip2	dapi	S+c+	S/DAPI	C/DAPI	S+C+/DAPI																					Bins	sox5	ctip2	dapi	S+c+	S/DAPI	C/DAPI	S+C+/DAPI
	1	82.0556	10.7222	138.889	8.94444	0.5908	0.0772	0.0644																					1	122.889	45.1667	189.389	37.7778	0.648871	0.238486	0.199472
	2	91.2222	15.3889	137.667	10.3333	0.662631	0.111784	0.0750605																					2	140.222	43.4444	216.722	44.2222	0.647014	0.200461	0.20405
	3	66.2222	45.7222	146.611	32.2778	0.451686	0.311861	0.220159																					3	125.944	61.6111	215.556	48.2778	0.584278	0.285825	0.223969
	4	22.6667	22.3333	178.056	11.7778	0.127301	0.125429	0.0661466																					4	90.6667	67.8889	229.5	45.5556	0.395062	0.295812	0.198499
	5	10.2222	6.72222	222.111	0.333333	0.046023	0.0302651	0.00150075																					5	42.7778	13.3889	276.167	1.33333	0.154898	0.0484812	0.004828
	6	11.1667	10.7778	65.1111	1.05556	0.171502	0.165529	0.0162116																					6	22.5	15.2222	70	1.22222	0.321429	0.21746	0.0174603
	Total	283.556	111.667	888.444	64.7222	0.31916	0.125688	0.0728489																					Total	545	246.722	1197.33	178.389	0.455178	0.20606	0.148988
	S+C+/DAPI	S+C+/DAPI	S+C+/DAPI	S+C+/DAPI	S+C+/DAPI	S+C+/DAPI
	0.00797872	0.0475162	0.135036	0.229958	0.230075	0.137931
	0.0676056	0.0585683	0.0992908	0.244701	0.141626	0.251816
	0.252451	0.208647	0.201581	0.211786	0.178808	0.287383
	0.0896414	0.0889571	0.00668896	0.204918	0.224227	0.163355
	0	0	0.00492611	0.00280505	0.004561	0.00670017
	0.00671141	0.0227273	0.0172414	0.0204082	0.0134529	0.0185185
	0.0722496	0.0733157	0.0728673	0.155606	0.142162	0.151094
	std error wt	std error CKO	T-test
	0.0375401	0.0306952	0.0487768	*
	0.0123467	0.0356036	0.0217644	*
	0.0159103	0.0321378	0.893791
	0.0275375	0.0179592	0.0145087	**
	0.00164204	0.00112624	0.20073
	0.00469919	0.00207641	0.730278
	0.000309056	0.00395029	4.17484e-05	***
[truncated: 5 more columns]
