# Supplementary material for: Pum2 and TDP-43 refine area-specific cytoarchitecture post-mitotically and modulate translation of Sox5, Bcl11b, and Rorb mRNAs in developing mouse neocortex
Source: eLife. 2022 Mar 9;11:e55199. doi: 10.7554/eLife.55199 (PMC8906809; doi:10.7554/eLife.55199)
Supplement: Source data 11. — Quantification of results from n = 3 animals from controls (Ctrl), Pum2 cKO, and TDP43A315T for Lmo4 and Bhlhb5 in F/M and pS areas in single bins and total. Results of F/M and pS for both markers are compared between mutants and their controls and between F/M and pS of each genotype. A summary of total cells only is shown independently comparing F/M and pS in each genotype (Figure 5a). Quantification of the number of barrels per section (Figure 5b) from n = 3 brains of controls (Ctrl), Pum2 cKO, or hTARDBPA315T (TDP43A315T). Data are shown as means ± standard error of the mean (SEM). *p≤0.05, **p≤0.01, ***p≤0.001, two-tailed t-test. Pum2 cKO: Pum2fl/fl; Emx1Cre. [file elife-55199-data11.xlsx]

## Sheet: sa cko
	Ctrl N1																						CKO N1
	sa1							sa2							sa3									sa1						sa2							SA3							sa4
	bins	Lmo4	Bhlhb5	DAPI	Lmo4/DAPI	Bhlhb5/DAPI		bins	Lmo4	Bhlhb5	DAPI	Lmo4/DAPI	Bhlhb5/DAPI		bins	Lmo4	Bhlhb5	DAPI	Lmo4/DAPI	Bhlhb5/DAPI			bins	Lmo4	Bhlhb5	DAPI	Lmo4/DAPI	Bhlhb5/DAPI		bins	Lmo4	Bhlhb5	DAPI	Lmo4/DAPI	Bhlhb5/DAPI		bins	Lmo4	Bhlhb5	DAPI	Lmo4/DAPI	Bhlhb5/DAPI		bins	Lmo4	Bhlhb5	DAPI	Lmo4/DAPI	Bhlhb5/DAPI
	1	56	44	144	0.388889	0.305556		1	42	37	125	0.336	0.296		1	43	34	145	0.296552	0.234483			1	21	40	174	0.12069	0.229885		1	52	38	160	0.325	0.2375		1	47	43	155	0.303226	0.277419		1	0	22	152	0	0.144737
	2	61	39	181	0.337017	0.21547		2	65	42	160	0.40625	0.2625		2	31	26	136	0.227941	0.191176			2	34	45	188	0.180851	0.239362		2	52	67	169	0.307692	0.39645		2	31	71	176	0.176136	0.403409		2	9	54	163	0.0552147	0.331288
	3	39	138	168	0.232143	0.821429		3	45	107	128	0.351562	0.835938		3	21	114	130	0.161538	0.876923			3	25	120	177	0.141243	0.677966		3	37	127	174	0.212644	0.729885		3	26	130	179	0.145251	0.726257		3	21	114	162	0.12963	0.703704
	4	21	176	178	0.117978	0.988764		4	24	158	147	0.163265	1.07483		4	6	139	182	0.032967	0.763736			4	15	156	196	0.0765306	0.795918		4	34	143	186	0.182796	0.768817		4	10	159	196	0.0510204	0.811224		4	18	122	172	0.104651	0.709302
	5	8	230	257	0.0311284	0.894942		5	26	207	259	0.100386	0.799228		5	7	188	251	0.0278884	0.749004			5	25	164	205	0.121951	0.8		5	33	157	206	0.160194	0.762136		5	14	169	208	0.0673077	0.8125		5	6	130	156	0.0384615	0.833333
	6	11	99	114	0.0964912	0.868421		6	4	51	77	0.0519481	0.662338		6	5	58	87	0.0574713	0.666667			6	1	39	62	0.016129	0.629032		6	8	25	53	0.150943	0.471698		6	6	35	56	0.107143	0.625		6	0	1	31	0	0.0322581
	Total	196	726	1042	0.1881	0.696737		Total	206	602	896	0.229911	0.671875		Total	113	559	931	0.121375	0.60043			Total	121	564	1002	0.120758	0.562874		Total	216	557	948	0.227848	0.587553		Total	134	607	970	0.138144	0.625773		Total	54	443	836	0.0645933	0.529904
	Ctrl N2																						CKO N2
	bins	Lmo4	Bhlhb5	DAPI	Lmo4/DAPI	Bhlhb5/DAPI		bins	Lmo4	Bhlhb5	DAPI	Lmo4/DAPI	Bhlhb5/DAPI		bins	Lmo4	Bhlhb5	DAPI	Lmo4/DAPI	Bhlhb5/DAPI			bins	Lmo4	Bhlhb5	DAPI	Lmo4/DAPI	Bhlhb5/DAPI		bins	Lmo4	Bhlhb5	DAPI	Lmo4/DAPI	Bhlhb5/DAPI		bins	Lmo4	Bhlhb5	DAPI	Lmo4/DAPI	Bhlhb5/DAPI		bins	Lmo4	Bhlhb5	DAPI	Lmo4/DAPI	Bhlhb5/DAPI
	1	9	50	145	0.062069	0.344828		1	23	39	163	0.141104	0.239264		1	43	35	155	0.277419	0.225806			1	22	10	112	0.196429	0.0892857		1	41	20	135	0.303704	0.148148		1	42	11	151	0.278146	0.0728477		1	20	12	133	0.150376	0.0902256
	2	18	45	178	0.101124	0.252809		2	21	54	167	0.125749	0.323353		2	29	45	169	0.171598	0.266272			2	26	23	126	0.206349	0.18254		2	37	36	136	0.272059	0.264706		2	38	32	152	0.25	0.210526		2	33	25	125	0.264	0.2
	3	20	73	191	0.104712	0.382199		3	10	123	160	0.0625	0.76875		3	18	119	170	0.105882	0.7			3	15	100	133	0.112782	0.75188		3	21	105	127	0.165354	0.826772		3	39	108	148	0.263514	0.72973		3	27	88	124	0.217742	0.709677
	4	5	137	181	0.0276243	0.756906		4	4	149	177	0.0225989	0.841808		4	4	146	193	0.0207254	0.756477			4	9	105	157	0.0573248	0.66879		4	4	117	152	0.0263158	0.769737		4	18	137	171	0.105263	0.80117		4	14	98	142	0.0985915	0.690141
	5	3	164	220	0.0136364	0.745455		5	11	161	228	0.0482456	0.70614		5	11	179	229	0.0480349	0.781659			5	5	183	165	0.030303	1.10909		5	4	192	180	0.0222222	1.06667		5	3	172	198	0.0151515	0.868687		5	2	144	154	0.012987	0.935065
	6	1	102	127	0.00787402	0.80315		6	6	74	103	0.0582524	0.718447		6	2	71	85	0.0235294	0.835294			6	11	46	54	0.203704	0.851852		6	11	60	52	0.211538	1.15385		6	0	16	35	0	0.457143		6	1	41	53	0.0188679	0.773585
	Total	56	571	1042	0.0537428	0.547985		Total	75	600	998	0.0751503	0.601202		Total	107	595	1001	0.106893	0.594406			Total	88	467	747	0.117805	0.625167		Total	118	530	782	0.150895	0.677749		Total	140	476	855	0.163743	0.556725		Total	97	408	731	0.132695	0.55814
	Ctrl N3																						CKO N3
	bins	Lmo4	Bhlhb5	DAPI	Lmo4/DAPI	Bhlhb5/DAPI		bins	Lmo4	Bhlhb5	DAPI	Lmo4/DAPI	Bhlhb5/DAPI		bins	Lmo4	Bhlhb5	DAPI	Lmo4/DAPI	Bhlhb5/DAPI			bins	Lmo4	Bhlhb5	DAPI	Lmo4/DAPI	Bhlhb5/DAPI		bins	Lmo4	Bhlhb5	DAPI	Lmo4/DAPI	Bhlhb5/DAPI		bins	Lmo4	Bhlhb5	DAPI	Lmo4/DAPI	Bhlhb5/DAPI
	1	43	34	143	0.300699	0.237762		1	34	37	226	0.150442	0.163717		1	32	36	157	0.203822	0.229299			1	27	34	128	0.210938	0.265625		1	26	24	135	0.192593	0.177778		1	41	7	117	0.350427	0.0598291
	2	31	25	136	0.227941	0.183824		2	14	42	256	0.0546875	0.164062		2	21	40	184	0.11413	0.217391			2	35	41	117	0.299145	0.350427		2	17	66	129	0.131783	0.511628		2	22	25	139	0.158273	0.179856
	3	21	114	130	0.161538	0.876923		3	10	148	262	0.0381679	0.564885		3	12	130	159	0.0754717	0.81761			3	39	86	103	0.378641	0.834951		3	8	93	97	0.0824742	0.958763		3	11	104	115	0.0956522	0.904348
	4	6	139	182	0.032967	0.763736		4	4	205	273	0.014652	0.750916		4	6	150	230	0.026087	0.652174			4	1	97	100	0.01	0.97		4	1	131	128	0.0078125	1.02344		4	5	135	113	0.0442478	1.19469
	5	7	188	251	0.0278884	0.749004		5	1	247	287	0.00348432	0.860627		5	6	186	254	0.023622	0.732283			5	27	136	141	0.191489	0.964539		5	3	175	185	0.0162162	0.945946		5	3	150	177	0.0169492	0.847458
	6	5	56	74	0.0675676	0.756757		6	7	59	118	0.059322	0.5		6	1	34	57	0.0175439	0.596491			6	0	27	45	0	0.6		6	1	16	43	0.0232558	0.372093		6	0	16	40	0	0.4
	Total	113	556	916	0.123362	0.606987		Total	70	738	1422	0.0492264	0.518987		Total	78	576	1041	0.074928	0.553314			Total	129	421	634	0.20347	0.664038		Total	56	505	717	0.0781032	0.704324		Total	82	437	701	0.116976	0.623395
	Average ctrl1							ctrl2							ctrl3								cko1							cko2							cko3
	bins	Lmo4	Bhlhb5	DAPI	Lmo4/DAPI	Bhlhb5/DAPI		bins	Lmo4	Bhlhb5	DAPI	Lmo4/DAPI	Bhlhb5/DAPI		bins	Lmo4	Bhlhb5	DAPI	Lmo4/DAPI	Bhlhb5/DAPI			bins	Lmo4	Bhlhb5	DAPI	Lmo4/DAPI	Bhlhb5/DAPI		bins	Lmo4	Bhlhb5	DAPI	Lmo4/DAPI	Bhlhb5/DAPI		bins	Lmo4	Bhlhb5	DAPI	Lmo4/DAPI	Bhlhb5/DAPI
	1	47	38.3333	138	0.34058	0.277778		1	25	41.3333	154.333	0.161987	0.267819		1	36.3333	35.6667	175.333	0.207224	0.203422			1	30	35.75	160.25	0.187207	0.223089		1	29.4	12.2	132.6	0.221719	0.092006		1	31.3333	21.6667	126.667	0.247368	0.171053
	2	52.3333	35.6667	159	0.32914	0.224319		2	22.6667	48	171.333	0.132296	0.280156		2	22	35.6667	192	0.114583	0.185764			2	31.5	59.25	174	0.181034	0.340517		2	33	29	131.4	0.251142	0.2207		2	24.6667	44	128.333	0.192208	0.342857
	3	35	119.667	142	0.246479	0.842723		3	16	105	173.667	0.0921305	0.604607		3	14.3333	130.667	183.667	0.0780399	0.711434			3	27.25	122.75	173	0.157514	0.709538		3	25.2	99.4	134.2	0.187779	0.740686		3	19.3333	94.3333	105	0.184127	0.898413
	4	17	157.667	169	0.100592	0.932939		4	4.33333	144	183.667	0.0235935	0.784029		4	5.33333	164.667	228.333	0.0233577	0.721168			4	19.25	145	187.5	0.102667	0.773333		4	10.8	112.6	154.2	0.0700389	0.73022		4	2.33333	121	113.667	0.0205279	1.06452
	5	13.6667	208.333	255.667	0.053455	0.814863		5	8.33333	168	225.667	0.0369276	0.744461		5	4.66667	207	264	0.0176768	0.784091			5	19.5	155	193.75	0.100645	0.8		5	3.4	170.4	173	0.0196532	0.984971		5	11	153.667	167.667	0.0656064	0.916501
	6	6.66667	69.3333	92.6667	0.0719424	0.748201		6	3	82.3333	105	0.0285714	0.784127		6	4.33333	49.6667	83	0.0522088	0.598394			6	3.75	25	50.5	0.0742574	0.49505		6	4.8	37.8	46.4	0.103448	0.814655		6	0.333333	19.6667	42.6667	0.0078125	0.460938
	Total	171.667	629	956.333	0.179505	0.65772		Total	79.3333	588.667	1013.67	0.0782637	0.58073		Total	87	623.333	1126.33	0.0772418	0.553418			Total	131.25	542.75	939	0.139776	0.578009		Total	106.6	461.4	771.8	0.138119	0.597823		Total	89	454.333	684	0.130117	0.66423
	Average ctrl																						Average CKO
	bins	Lmo4	Bhlhb5	DAPI	Lmo4/DAPI	Bhlhb5/DAPI																	bins	Lmo4	Bhlhb5	DAPI	Lmo4/DAPI	Bhlhb5/DAPI
	1	36.1111	38.4444	155.889	0.231646	0.246614																	1	30.2444	23.2056	139.839	0.216281	0.165945
	2	32.3333	39.7778	174.111	0.185705	0.228462																	2	29.7222	44.0833	144.578	0.205579	0.304911
	3	21.7778	118.444	166.444	0.130841	0.711615																	3	23.9278	105.494	137.4	0.174147	0.767791
	4	8.88889	155.444	193.667	0.0458979	0.802639																	4	10.7944	126.2	151.789	0.0711149	0.831418
	5	8.88889	194.444	248.444	0.0357782	0.782648																	5	11.3	159.689	178.139	0.0634337	0.896429
	6	4.66667	67.1111	93.5556	0.0498812	0.71734																	6	2.96111	27.4889	46.5222	0.0636494	0.590877					Comparison between MA ans SA in ctrls and Pum2 CKO
	Total	112.667	613.667	1032.11	0.109161	0.594574																	Total	108.95	486.161	798.267	0.136483	0.609021
																														sa1 ctrl	sa2 ctrl	sa3 ctrl	ma1 ctrl	ma2 ctrl	ma3 ctrl		sa1 ctrl	sa2 ctrl	sa3 ctrl	ma1 ctrl	ma2 ctrl	ma3 ctrl				ma1 cko	ma2 cko	ma3 cko	sa1 cko
	sa1 ctrl	sa2 ctrl	sa3 ctrl	sa1 cko	sa2 cko	sa3 cko		sa1 ctrl	sa2 ctrl	sa3 ctrl	sa1 cko	sa2 cko	sa3 cko																bins	Lmo4/DAPI	Lmo4/DAPI	Lmo4/DAPI	Lmo4/DAPI	Lmo4/DAPI	Lmo4/DAPI		Bhlhb5/DAPI	Bhlhb5/DAPI	Bhlhb5/DAPI	Bhlhb5/DAPI	Bhlhb5/DAPI	Bhlhb5/DAPI				Lmo4/DAPI	Lmo4/DAPI	Lmo4/DAPI	Lmo4/DAPI
bins	Lmo4/DAPI	Lmo4/DAPI	Lmo4/DAPI	Lmo4/DAPI	Lmo4/DAPI	Lmo4/DAPI		Bhlhb5/DAPI	Bhlhb5/DAPI	Bhlhb5/DAPI	Bhlhb5/DAPI	Bhlhb5/DAPI	Bhlhb5/DAPI																1	0.34058	0.161987	0.207224	0.564394	0.95102	0.713755		0.277778	0.267819	0.203422	0.030303	0.0122449	0.126394				0.25	0.46374	0.319202	0.187207
1	0.34058	0.161987	0.207224	0.187207	0.221719	0.247368		0.277778	0.267819	0.203422	0.223089	0.092006	0.171053																2	0.32914	0.132296	0.114583	0.422118	0.615385	0.68997		0.224319	0.280156	0.185764	0.0420561	0.025641	0.12766				0.309478	0.445565	0.350109	0.181034
2	0.32914	0.132296	0.114583	0.181034	0.251142	0.192208		0.224319	0.280156	0.185764	0.340517	0.2207	0.342857																3	0.246479	0.0921305	0.0780399	0.345902	0.531646	0.642633		0.842723	0.604607	0.711434	0.231148	0.224684	0.605016				0.338742	0.395948	0.407555	0.157514
3	0.246479	0.0921305	0.0780399	0.157514	0.187779	0.184127		0.842723	0.604607	0.711434	0.709538	0.740686	0.898413																4	0.100592	0.0235935	0.0233577	0.531496	0.601351	0.594872		0.932939	0.784029	0.721168	0.470472	0.523649	0.792308				0.45591	0.4375	0.478541	0.102667
4	0.100592	0.0235935	0.0233577	0.102667	0.0700389	0.0205279		0.932939	0.784029	0.721168	0.773333	0.73022	1.06452																5	0.053455	0.0369276	0.0176768	0.484138	0.438073	0.441331		0.814863	0.744461	0.784091	0.524138	0.722477	0.605954				0.388974	0.462908	0.525896	0.100645
5	0.053455	0.0369276	0.0176768	0.100645	0.0196532	0.0656064		0.814863	0.744461	0.784091	0.8	0.984971	0.916501																6	0.0719424	0.0285714	0.0522088	0.414938	0.37037	0.385185		0.748201	0.784127	0.598394	0.767635	0.592593	0.340741				0.340426	0.483568	0.278846	0.0742574
6	0.0719424	0.0285714	0.0522088	0.0742574	0.103448	0.0078125		0.748201	0.784127	0.598394	0.49505	0.814655	0.460938																Total	0.179505	0.0782637	0.0772418	0.461278	0.584939	0.576254		0.65772	0.58073	0.553418	0.303626	0.359603	0.481868				0.350526	0.44489	0.414714	0.139776
Total	0.179505	0.0782637	0.0772418	0.139776	0.138119	0.130117		0.65772	0.58073	0.553418	0.578009	0.597823	0.66423
																														Error Lmo4/DAPI SA ctrl	Error Lmo4/DAPI ma ctrl						Error bhlhb5/DAPI SA ctrl	Error bhlhb5/DAPI MA ctrl				T-test Lmo4/DAPI ctrl SA vs MA	T-test Bhlhb5/DAPI ctrl S vs MA			Error Lmo4/DAPI ma cko	Error Lmo4/DAPI sa cKO
	Error Lmo4/DAPI ctrl	Error Lmo4/DAPI CKO						Error bhlhb5/DAPI ctrl	Error bhlhb5/DAPI CKO				T-test Lmo4/DAPI	T-test Bhlhb5/DAPI																0.0536063	0.112567						0.0233034	0.0354257				0.0153223	0.0103388			0.0629662	0.0174297
	0.0536063	0.0174297						0.0233034	0.0381072				0.767562	0.121321																0.0687574	0.0798119						0.0274004	0.0316273				0.0218979	0.0169298			0.0403335	0.0217473
	0.0687574	0.0217473						0.0274004	0.0403347				0.834058	0.217609																0.0539514	0.0865604						0.0688591	0.125714				0.0226288	0.0630893			0.0212686	0.00953804
	0.0539514	0.00953804						0.0688591	0.0584626				0.530347	0.522127																0.0257055	0.0222838						0.0627927	0.0996057				0.000101567	0.1388			0.0118683	0.0238778
	0.0257055	0.0238778						0.0627927	0.104987				0.686604	0.741178																0.0103383	0.0148417						0.0203769	0.057547				2.06783e-05	0.0552229			0.0395682	0.023451
	0.0103383	0.023451						0.0203769	0.0539933				0.368578	0.107458																0.012537	0.0131042						0.056877	0.123897				4.80758e-05	0.352649			0.0606414	0.0282973
	0.012537	0.0282973						0.056877	0.112652				0.741761	0.395406																0.0339187	0.0398516						0.0312272	0.0526266				0.00120475	0.0243824			0.0278241	0.00298216
	0.0339187	0.00298216						0.0312272	0.0260732				0.514312	0.713079
																																					Average Summary for final graph
	Final results of MA ctrl and Pum2 CKO																																					ctrl			ctrl					cko SA			CKO MA
	Average wt																						Average CKO															MA	SA		MA	SA				Lmo4/DAPI	Bhlhb5/DAPI		Lmo4/DAPI
	bins	Lmo4	Bhlhb5	DAPI	Lmo4/DAPI	Bhlhb5/DAPI																	bins	Lmo4	Bhlhb5	DAPI	Lmo4/DAPI	Bhlhb5/DAPI									bins	Lmo4/DAPI	Lmo4/DAPI		Bhlhb5/DAPI	Bhlhb5/DAPI				0.216281	0.165945		0.346981
	1	103.944	7.94444	144.333	0.720169	0.0550423																	1	55.5556	6.77778	160.111	0.346981	0.0423317									1	0.720169	0.231646		0.0550423	0.246614				0.205579	0.304911		0.368027
	2	99.9444	11.3333	178.167	0.56096	0.0636109																	2	60.1111	16.3333	163.333	0.368027	0.1									2	0.56096	0.185705		0.0636109	0.228462				0.174147	0.767791		0.381417
	3	85.6111	59.6667	173.611	0.49312	0.34368																	3	65.2222	36.3333	171	0.381417	0.212476									3	0.49312	0.130841		0.34368	0.711615				0.0711149	0.831418		0.456254
	4	98.3333	103.889	170.778	0.575797	0.608328																	4	78.2222	73.7778	171.444	0.456254	0.430331									4	0.575797	0.0458979		0.608328	0.802639				0.0634337	0.896429		0.4538
	5	112.833	152.389	248.389	0.454261	0.613509																	5	92.2222	105.111	203.222	0.4538	0.517223									5	0.454261	0.0357782		0.613509	0.782648				0.0636494	0.590877		0.384058
	6	26.4444	38.8889	67.2778	0.393064	0.578035																	6	23.5556	23	61.3333	0.384058	0.375									6	0.393064	0.0498812		0.578035	0.71734				0.136483	0.609021		0.402914
	Total	527.111	374.111	982.556	0.53647	0.380753																	Total	374.889	261.333	930.444	0.402914	0.280869									Total	0.53647	0.109161		0.380753	0.594574
																																													CKO MA	cko SA		CKO MA	cko SA
																																					bins	Error Lmo4/DAPI ma	Error Lmo4/DAPI SA		Error bhlhb5/DAPI MA	Error bhlhb5/DAPI SA			Lmo4/DAPI	Lmo4/DAPI		Bhlhb5/DAPI	Bhlhb5/DAPI
	ma1 wt	ma2 wt	ma3 wt	ma1 cko	ma2 cko	ma3 cko		ma1 wt	ma2 wt	ma3 wt	ma1 cko	ma2 cko	ma3 cko																								1	0.112567	0.0536063		0.0354257	0.0233034			0.346981	0.216281		0.0423317	0.165945
	Lmo4/DAPI	Lmo4/DAPI	Lmo4/DAPI	Lmo4/DAPI	Lmo4/DAPI	Lmo4/DAPI		Bhlhb5/DAPI	Bhlhb5/DAPI	Bhlhb5/DAPI	Bhlhb5/DAPI	Bhlhb5/DAPI	Bhlhb5/DAPI																								2	0.0798119	0.0687574		0.0316273	0.0274004			0.368027	0.205579		0.1	0.304911
	0.564394	0.95102	0.713755	0.25	0.46374	0.319202		0.030303	0.0122449	0.126394	0.0988372	0.00572519	0.0174564																								3	0.0865604	0.0539514		0.125714	0.0688591			0.381417	0.174147		0.212476	0.767791
	0.422118	0.615385	0.68997	0.309478	0.445565	0.350109		0.0420561	0.025641	0.12766	0.168279	0.0120968	0.118162																								4	0.0222838	0.0257055		0.0996057	0.0627927			0.456254	0.0711149		0.430331	0.831418
	0.345902	0.531646	0.642633	0.338742	0.395948	0.407555		0.231148	0.224684	0.605016	0.340771	0.0976059	0.210736																								5	0.0148417	0.0103383		0.057547	0.0203769			0.4538	0.0634337		0.517223	0.896429
	0.531496	0.601351	0.594872	0.45591	0.4375	0.478541		0.470472	0.523649	0.792308	0.570356	0.382353	0.32618																								6	0.0131042	0.012537		0.123897	0.056877			0.384058	0.0636494		0.375	0.590877
	0.484138	0.438073	0.441331	0.388974	0.462908	0.525896		0.524138	0.722477	0.605954	0.499234	0.54451	0.503984																								Total	0.0398516	0.0339187		0.0526266	0.0312272			0.402914	0.136483		0.280869	0.609021
	0.414938	0.37037	0.385185	0.340426	0.483568	0.278846		0.767635	0.592593	0.340741	0.425532	0.41784	0.173077
	0.461278	0.584939	0.576254	0.350526	0.44489	0.414714		0.303626	0.359603	0.481868	0.351544	0.242485	0.242499																								bins	T-test Lmo4/DAPI	T-test Bhlhb5/DAPI						Error Lmo4/DAPI ma	Error Lmo4/DAPI sa		Error bhlhb5/DAPI ma	Error bhlhb5/DAPI sa
																																					1	0.0153223	0.0103388						0.0629662	0.0174297		0.0292787	0.0381072
	Error Lmo4/DAPI WT	Error Lmo4/DAPI CKO						Error bhlhb5/DAPI WT	Error bhlhb5/DAPI CKO				T-test Lmo4/DAPI	T-test Bhlhb5/DAPI																							2	0.0218979	0.0169298						0.0403335	0.0217473		0.04604	0.0403347
	0.112567	0.0629662						0.0354257	0.0292787				0.0365216	0.750732																							3	0.0226288	0.0630893						0.0212686	0.00953804		0.0702522	0.0584626
	0.0798119	0.0403335						0.0316273	0.04604				0.081161	0.571372																							4	0.000101567	0.1388						0.0118683	0.0238778		0.0738327	0.104987
	0.0865604	0.0212686						0.125714	0.0702522				0.230437	0.394551																							5	2.06783e-05	0.0552229						0.0395682	0.023451		0.014366	0.0539933
	0.0222838	0.0118683						0.0996057	0.0738327				0.00932832	0.244131																							6	4.80758e-05	0.352649						0.0606414	0.0282973		0.0828995	0.112652
	0.0148417	0.0395682						0.057547	0.014366				0.916004	0.161838																							Total	0.00120475	0.0243824						0.0278241	0.00298216		0.0363507	0.0260732
	0.0131042	0.0606414						0.123897	0.0828995				0.734637	0.200613
	0.0398516	0.0278241						0.0526266	0.0363507				0.0474457	0.183088																															T-test Lmo4/DAPI	T-test Bhlhb5/DAPI
																																													0.12703	0.0649602
																																													0.0249573	0.0299998
																											Average summary for total cells																		0.000934602	0.00344509
																																													0.00012346	0.028619
																											ctrl	ctrl	cko	cko															0.000987952	0.00233456
																											Lmo4/DAPI	Bhlhb5/DAPI	Lmo4/DAPI	Bhlhb5/DAPI															0.010266	0.14668
																										sa	0.109161	0.594574	0.136483	0.609021															0.000670224	0.00171001
																										ma	0.53647	0.380753	0.402914	0.280869
																										Error SA	0.0339187	0.0312272	0.00298216	0.0260732
																										Error MA	0.0398516	0.0526266	0.0278241	0.0363507
[truncated: 8 more columns]

## Sheet: sa 315T
																							315T N1
	ctrl N1		SA1						SA2							SA3
	bins	Lmo4	Bhlhb5	DAPI	Lmo4/DAPI	Bhlhb5/DAPI		bins	Lmo4	Bhlhb5	DAPI	Lmo4/DAPI	Bhlhb5/DAPI		bins	Lmo4	Bhlhb5	DAPI	Lmo4/DAPI	Bhlhb5/DAPI			bins	Lmo4	Bhlhb5	DAPI	Lmo4/DAPI	Bhlhb5/DAPI		bins	Lmo4	Bhlhb5	DAPI	Lmo4/DAPI	Bhlhb5/DAPI		bins	Lmo4	Bhlhb5	DAPI	Lmo4/DAPI	Bhlhb5/DAPI
	1	42	43	191	0.219895	0.225131		1	27	10	77	0.350649	0.12987		1	27	27	122	0.221311	0.221311			1	65	34	195	0.333333	0.174359		1	67	27	193	0.34715	0.139896		1	65	34	195	0.333333	0.174359
	2	39	49	208	0.1875	0.235577		2	33	18	85	0.388235	0.211765		2	39	39	125	0.312	0.312			2	50	32	242	0.206612	0.132231		2	51	33	195	0.261538	0.169231		2	50	32	242	0.206612	0.132231
	3	36	124	209	0.172249	0.593301		3	28	67	75	0.373333	0.893333		3	31	74	127	0.244094	0.582677			3	25	147	236	0.105932	0.622881		3	43	118	220	0.195455	0.536364		3	25	147	236	0.105932	0.622881
	4	22	164	241	0.0912863	0.680498		4	48	93	97	0.494845	0.958763		4	50	101	130	0.384615	0.776923			4	9	171	273	0.032967	0.626374		4	13	168	246	0.0528455	0.682927		4	9	171	273	0.032967	0.626374
	5	21	192	264	0.0795455	0.727273		5	21	114	117	0.179487	0.974359		5	14	136	141	0.0992908	0.964539			5	9	207	296	0.0304054	0.699324		5	23	201	283	0.0812721	0.710247		5	9	207	296	0.0304054	0.699324
	6	7	60	104	0.0673077	0.576923		6	4	54	62	0.0645161	0.870968		6	6	19	45	0.133333	0.422222			6	5	48	89	0.0561798	0.539326		6	3	23	65	0.0461538	0.353846		6	5	48	89	0.0561798	0.539326
	Total	167	632	1217	0.137223	0.51931		Total	161	356	513	0.31384	0.693957		Total	167	396	690	0.242029	0.573913			Total	163	639	1331	0.122464	0.48009		Total	200	570	1202	0.166389	0.47421		Total	163	639	1331	0.122464	0.48009
	ctrl N2																						315T N2
	bins	Lmo4	Bhlhb5	DAPI	Lmo4/DAPI	Bhlhb5/DAPI		bins	Lmo4	Bhlhb5	DAPI	Lmo4/DAPI	Bhlhb5/DAPI										bins	Lmo4	Bhlhb5	DAPI	Lmo4/DAPI	Bhlhb5/DAPI		bins	Lmo4	Bhlhb5	DAPI	Lmo4/DAPI	Bhlhb5/DAPI		bins	Lmo4	Bhlhb5	DAPI	Lmo4/DAPI	Bhlhb5/DAPI
	1	16	14	123	0.130081	0.113821		1	50	29	110	0.454545	0.263636										1	34	49	165	0.206061	0.29697		1	94	51	211	0.445498	0.241706		1	81	52	197	0.411168	0.263959
	2	35	33	115	0.304348	0.286957		2	28	32	115	0.243478	0.278261										2	47	61	184	0.255435	0.331522		2	99	65	263	0.376426	0.247148		2	90	54	236	0.381356	0.228814
	3	31	75	118	0.262712	0.635593		3	11	123	118	0.0932203	1.04237										3	46	107	181	0.254144	0.59116		3	69	127	260	0.265385	0.488462		3	70	153	218	0.321101	0.701835
	4	46	97	138	0.333333	0.702899		4	8	144	166	0.0481928	0.86747										4	64	137	204	0.313725	0.671569		4	45	170	266	0.169173	0.639098		4	41	185	277	0.148014	0.66787
	5	23	124	141	0.163121	0.879433		5	1	177	224	0.00446429	0.790179										5	105	185	217	0.483871	0.852535		5	13	202	306	0.0424837	0.660131		5	13	219	309	0.0420712	0.708738
	6	8	51	51	0.156863	1		6	5	55	89	0.0561798	0.617978										6	43	69	71	0.605634	0.971831		6	7	43	77	0.0909091	0.558442		6	6	64	76	0.0789474	0.842105
	Total	159	394	686	0.231778	0.574344		Total	103	560	822	0.125304	0.681265										Total	339	608	1022	0.331703	0.594912		Total	327	658	1383	0.236443	0.475777		Total	301	727	1313	0.229246	0.553694
	ctrl N3																						315T N3
	bins	Lmo4	Bhlhb5	DAPI	Lmo4/DAPI	Bhlhb5/DAPI		bins	Lmo4	Bhlhb5	DAPI	Lmo4/DAPI	Bhlhb5/DAPI										bins	Lmo4	Bhlhb5	DAPI	Lmo4/DAPI	Bhlhb5/DAPI		bins	Lmo4	Bhlhb5	DAPI	Lmo4/DAPI	Bhlhb5/DAPI		bins	Lmo4	Bhlhb5	DAPI	Lmo4/DAPI	Bhlhb5/DAPI
	1	24	21	139	0.172662	0.151079		1	24	21	140	0.171429	0.15										1	65	34	195	0.333333	0.174359		1	67	27	193	0.34715	0.139896		1	51	10	188	0.271277	0.0531915
	2	25	19	153	0.163399	0.124183		2	25	19	151	0.165563	0.125828										2	50	32	242	0.206612	0.132231		2	51	33	195	0.261538	0.169231		2	30	16	212	0.141509	0.0754717
	3	22	103	134	0.164179	0.768657		3	22	103	133	0.165414	0.774436										3	25	147	236	0.105932	0.622881		3	43	118	220	0.195455	0.536364		3	21	111	190	0.110526	0.584211
	4	14	136	174	0.0804598	0.781609		4	14	136	172	0.0813953	0.790698										4	9	171	273	0.032967	0.626374		4	13	168	246	0.0528455	0.682927		4	4	154	222	0.018018	0.693694
	5	12	148	233	0.0515021	0.635193		5	12	148	231	0.0519481	0.640693										5	9	207	296	0.0304054	0.699324		5	23	201	283	0.0812721	0.710247		5	2	220	310	0.00645161	0.709677
	6	11	36	71	0.15493	0.507042		6	11	36	69	0.15942	0.521739										6	5	48	89	0.0561798	0.539326		6	3	23	65	0.0461538	0.353846		6	2	85	142	0.0140845	0.598592
	Total	108	463	904	0.119469	0.512168		Total	108	463	896	0.120536	0.516741										Total	163	639	1331	0.122464	0.48009		Total	200	570	1202	0.166389	0.47421		Total	110	596	1264	0.0870253	0.471519
	Average ctrl1							Average ctrl2							Average ctrl3								Average 315T1							Average 315T2							Average 315T3
	bins	Lmo4	Bhlhb5	DAPI	Lmo4/DAPI	Bhlhb5/DAPI		bins	Lmo4	Bhlhb5	DAPI	Lmo4/DAPI	Bhlhb5/DAPI		bins	Lmo4	Bhlhb5	DAPI	Lmo4/DAPI	Bhlhb5/DAPI			bins	Lmo4	Bhlhb5	DAPI	Lmo4/DAPI	Bhlhb5/DAPI		bins	Lmo4	Bhlhb5	DAPI	Lmo4/DAPI	Bhlhb5/DAPI		bins	Lmo4	Bhlhb5	DAPI	Lmo4/DAPI	Bhlhb5/DAPI
	1	32	26.6667	130	0.246154	0.205128		1	33	21.5	116.5	0.283262	0.184549		1	24	21	139.5	0.172043	0.150538			1	65.6667	31.6667	194.333	0.337907	0.16295		1	69.6667	50.6667	191	0.364747	0.265271		1	61	23.6667	192	0.317708	0.123264
	2	37	35.3333	139.333	0.26555	0.253589		2	31.5	32.5	115	0.273913	0.282609		2	25	19	152	0.164474	0.125			2	50.3333	32.3333	226.333	0.222386	0.142857		2	78.6667	60	227.667	0.345534	0.263543		2	43.6667	27	216.333	0.201849	0.124807
	3	31.6667	88.3333	137	0.231144	0.644769		3	21	99	118	0.177966	0.838983		3	22	103	133.5	0.164794	0.771536			3	31	137.333	230.667	0.134393	0.595376		3	61.6667	129	219.667	0.280728	0.587253		3	29.6667	125.333	215.333	0.137771	0.582043
	4	40	119.333	156	0.25641	0.764957		4	27	120.5	152	0.177632	0.792763		4	14	136	173	0.0809249	0.786127			4	10.3333	170	264	0.0391414	0.643939		4	50	164	249	0.200803	0.658635		4	8.66667	164.333	247	0.0350877	0.665317
	5	18.6667	147.333	174	0.10728	0.846743		5	12	150.5	182.5	0.0657534	0.824658		5	12	148	232	0.0517241	0.637931			5	13.6667	205	291.667	0.0468571	0.702857		5	43.6667	202	277.333	0.157452	0.728365		5	11.3333	209.333	296.333	0.0382452	0.706412
	6	5.66667	44.3333	70.3333	0.0805687	0.630332		6	6.5	53	70	0.0928571	0.757143		6	11	36	70	0.157143	0.514286			6	4.33333	39.6667	81	0.0534979	0.489712		6	18.6667	58.6667	74.6667	0.25	0.785714		6	3.33333	52	98.6667	0.0337838	0.527027
	Total	165	461.333	806.667	0.204545	0.571901		Total	131	477	754	0.17374	0.632626		Total	108	463	900	0.12	0.514444			Total	175.333	616	1288	0.136128	0.478261		Total	322.333	664.333	1239.33	0.260086	0.536041		Total	157.667	601.667	1265.67	0.124572	0.475375
	Average ctrl																						Average 315T
	bins	Lmo4	Bhlhb5	DAPI	Lmo4/DAPI	Bhlhb5/DAPI																	bins	Lmo4	Bhlhb5	DAPI	Lmo4/DAPI	Bhlhb5/DAPI
	1	29.6667	23.0556	128.667	0.23057	0.179188																	1	65.4444	35.3333	192.444	0.340069	0.183603
	2	31.1667	28.9444	135.444	0.230107	0.2137																	2	57.5556	39.7778	223.444	0.257583	0.178021
	3	24.8889	96.7778	129.5	0.192192	0.747319																	3	40.7778	130.556	221.889	0.183776	0.588383
	4	27	125.278	160.333	0.168399	0.781358																	4	23	166.111	253.333	0.0907895	0.655702
	5	14.2222	148.611	196.167	0.0725007	0.757576																	5	22.8889	205.444	288.444	0.0793529	0.71225
	6	7.72222	44.4444	70.1111	0.110143	0.633914																	6	8.77778	50.1111	84.7778	0.103539	0.591088							Comparison MA vs SA Ctrl
	Total	134.667	467.111	820.222	0.164183	0.569493																	Total	218.444	627.333	1264.33	0.172774	0.496177
																															sa1 ctrl	sa2 ctrl	sa3 ctrl	ma1 ctrl	ma2 ctrl	ma3 ctrl		sa1 ctrl	sa2 ctrl	sa3 ctrl	ma1 ctrl	ma2 ctrl	ma3 ctrl					ma1 315T	ma2 315T
	sa1 ctrl	sa2 ctrl	sa3 ctrl	sa1 315T	sa2 315T	sa3 315T		sa1 ctrl	sa2 ctrl	sa3 ctrl	sa1 315T	sa2 315T	sa3 315T																	bins	Lmo4/DAPI	Lmo4/DAPI	Lmo4/DAPI	Lmo4/DAPI	Lmo4/DAPI	Lmo4/DAPI		Bhlhb5/DAPI	Bhlhb5/DAPI	Bhlhb5/DAPI	Bhlhb5/DAPI	Bhlhb5/DAPI	Bhlhb5/DAPI					Lmo4/DAPI	Lmo4/DAPI
	Lmo4/DAPI	Lmo4/DAPI	Lmo4/DAPI	Lmo4/DAPI	Lmo4/DAPI	Lmo4/DAPI		Bhlhb5/DAPI	Bhlhb5/DAPI	Bhlhb5/DAPI	Bhlhb5/DAPI	Bhlhb5/DAPI	Bhlhb5/DAPI																	1	0.246154	0.283262	0.172043	0.477341	0.492901	0.540453		0.205128	0.184549	0.150538	0.0332326	0.0365112	0.0226537					0.24924	0.462547
	0.246154	0.283262	0.172043	0.337907	0.364747	0.317708		0.205128	0.184549	0.150538	0.16295	0.265271	0.123264																	2	0.26555	0.273913	0.164474	0.492188	0.385666	0.470085		0.253589	0.282609	0.125	0.0416667	0.0460751	0.0712251					0.320109	0.422609
	0.26555	0.273913	0.164474	0.222386	0.345534	0.201849		0.253589	0.282609	0.125	0.142857	0.263543	0.124807																	3	0.231144	0.177966	0.164794	0.474227	0.416949	0.471642		0.644769	0.838983	0.771536	0.31701	0.266102	0.319403					0.321476	0.448675
	0.231144	0.177966	0.164794	0.134393	0.280728	0.137771		0.644769	0.838983	0.771536	0.595376	0.587253	0.582043																	4	0.25641	0.177632	0.0809249	0.481982	0.538732	0.514589		0.764957	0.792763	0.786127	0.644144	0.46831	0.501326					0.45679	0.473344
	0.25641	0.177632	0.0809249	0.0391414	0.200803	0.0350877		0.764957	0.792763	0.786127	0.643939	0.658635	0.665317																	5	0.10728	0.0657534	0.0517241	0.474048	0.566285	0.558974		0.846743	0.824658	0.637931	0.645329	0.531915	0.538462					0.494318	0.551105
	0.10728	0.0657534	0.0517241	0.0468571	0.157452	0.0382452		0.846743	0.824658	0.637931	0.702857	0.728365	0.706412																	6	0.0805687	0.0928571	0.157143	0.22807	0.285714	0.815789		0.630332	0.757143	0.514286	0.409357	0.442857	0.118421					0.575931	0.485623
	0.0805687	0.0928571	0.157143	0.0534979	0.25	0.0337838		0.630332	0.757143	0.514286	0.489712	0.785714	0.527027																	Total	0.204545	0.17374	0.12	0.460801	0.470884	0.524483		0.571901	0.632626	0.514444	0.38284	0.286145	0.297606					0.393599	0.476402
	0.204545	0.17374	0.12	0.136128	0.260086	0.124572		0.571901	0.632626	0.514444	0.478261	0.536041	0.475375
																															Error Lmo4/DAPI sa	Error Lmo4/DAPI ma						Error bhlhb5/DAPI sa	Error bhlhb5/DAPI ma				T-test Lmo4/DAPI	T-test Bhlhb5/DAPI				Error Lmo4/DAPI ma	Error Lmo4/DAPI sa
	Error Lmo4/DAPI ctrl	Error Lmo4/DAPI 315T						Error bhlhb5/DAPI ctrl	Error bhlhb5/DAPI 315T				T-test Lmo4/DAPI	T-test Bhlhb5/DAPI																	0.032693	0.018983						0.0159172	0.00418124				0.00204025	0.00081895				0.0827667	0.0136239
	0.032693	0.0136239						0.0159172	0.042302				0.0398899	0.937755																	0.0351689	0.0324569						0.0484296	0.00920644				0.0109429	0.0273792				0.0371677	0.0448657
	0.0351689	0.0448657						0.0484296	0.0435498				0.719876	0.542272																	0.0202808	0.0186766						0.0569298	0.017382				0.000674711	0.00162808				0.0410488	0.0482253
	0.0202808	0.0482253						0.0569298	0.00387921				0.899968	0.0456531																	0.0507463	0.016443						0.00838441	0.0539571				0.00310408	0.0111889				0.0212164	0.0545754
	0.0507463	0.0545754						0.00838441	0.00631406				0.343612	0.000281927																	0.0166794	0.0296024						0.0662307	0.0367621				0.000174996	0.0592802				0.0248335	0.0383808
	0.0166794	0.0383808						0.0662307	0.0079766				0.894124	0.439292																	0.0237431	0.187041						0.0701298	0.103017				0.152113	0.0674461				0.0283244	0.0690214
	0.0237431	0.0690214						0.0701298	0.0930737				0.977012	0.790469																	0.0247037	0.0197624						0.0341204	0.0305014				0.000542252	0.005399				0.0257162	0.0433738
	0.0247037	0.0433738						0.0341204	0.0197585				0.887832	0.124594
	final esults of MA ctrl vs 315T
	Average ctrl																						Average 315T										ctrl	ctrl	315T	315T
	bins	Lmo4	Bhlhb5	DAPI	Lmo4/DAPI	Bhlhb5/DAPI																	bins	Lmo4	Bhlhb5	DAPI	Lmo4/DAPI	Bhlhb5/DAPI					Lmo4/DAPI	Bhlhb5/DAPI	Lmo4/DAPI	Bhlhb5/DAPI
	1	81.1667	5	161.444	0.502753	0.0309704																	1	81.5556	13.6667	201.222	0.405301	0.0679183				sa	0.164183	0.569493	0.172774	0.496177
	2	84.1111	9.83333	187.611	0.448327	0.0524134																	2	84.8889	16.2222	217.778	0.389796	0.0744898				ma	0.483186	0.325824	0.441253	0.305469
	3	84.3333	55.7778	186.056	0.45327	0.299791																	3	83.1111	42.3333	229.889	0.361527	0.184147				Error SA	0.0247037	0.0341204	0.0433738	0.0197585
	4	102	108.722	199.944	0.510142	0.543762																	4	103	87.5556	231.556	0.444818	0.378119				Error MA	0.0197624	0.0305014	0.0257162	0.0254136
	5	120.444	133.278	229.222	0.525448	0.581435																	5	142.111	146.889	263.667	0.53898	0.557101
	6	21.2778	20.0556	56.7222	0.375122	0.353575																	6	54.8889	73.7778	101.333	0.541667	0.72807
	Total	493.333	332.667	1021	0.483186	0.325824																	Total	549.556	380.444	1245.44	0.441253	0.305469
	ma1 ctrl	ma2 ctrl	ma3 ctrl	ma1 315T	ma2 315T	ma3 315T		ma1 ctrl	ma2 ctrl	ma3 ctrl	ma1 315T	ma2 315T	ma3 315T
	Lmo4/DAPI	Lmo4/DAPI	Lmo4/DAPI	Lmo4/DAPI	Lmo4/DAPI	Lmo4/DAPI		Bhlhb5/DAPI	Bhlhb5/DAPI	Bhlhb5/DAPI	Bhlhb5/DAPI	Bhlhb5/DAPI	Bhlhb5/DAPI
	0.477341	0.492901	0.540453	0.24924	0.462547	0.521809		0.0332326	0.0365112	0.0226537	0.130699	0.0468165	0.0193861
	0.492188	0.385666	0.470085	0.320109	0.422609	0.438838		0.0416667	0.0460751	0.0712251	0.136799	0.0591304	0.0183486
	0.474227	0.416949	0.471642	0.321476	0.448675	0.330028		0.31701	0.266102	0.319403	0.256917	0.178808	0.110482
	0.481982	0.538732	0.514589	0.45679	0.473344	0.403053		0.644144	0.46831	0.501326	0.322222	0.483037	0.348092
	0.474048	0.566285	0.558974	0.494318	0.551105	0.578674		0.645329	0.531915	0.538462	0.509091	0.624309	0.548765
	0.22807	0.285714	0.815789	0.575931	0.485623	0.564		0.409357	0.442857	0.118421	0.813754	0.648562	0.708
	0.460801	0.470884	0.524483	0.393599	0.476402	0.463455		0.38284	0.286145	0.297606	0.328159	0.33274	0.254312
	Error Lmo4/DAPI ctrl	Error Lmo4/DAPI 315T						Error bhlhb5/DAPI ctrl	Error bhlhb5/DAPI 315T				T-test Lmo4/DAPI	T-test Bhlhb5/DAPI
	0.018983	0.0827667						0.00418124	0.0334824				0.337863	0.360228
	0.0324569	0.0371677						0.00920644	0.0347419				0.323924	0.634996
	0.0186766	0.0410488						0.017382	0.0423037				0.1242	0.0602459
	0.016443	0.0212164						0.0539571	0.0498559				0.0660635	0.104933
	0.0296024	0.0248335						0.0367621	0.0337937				0.841122	0.83381
	0.187041	0.0283244						0.103017	0.0483074				0.62954	0.0245697
	0.0197624	0.0257162						0.0305014	0.0254136				0.275781	0.688415
[truncated: 10 more columns]

## Sheet: ma cko
																							CKO N1		ma1							ma2						ma3
	Ctrl N1
	ma1							ma2							ma3								bins	Lmo4	Bhlhb5	DAPI	Lmo4/DAPI	Bhlhb5/DAPI		bins	Lmo4	Bhlhb5	DAPI	Lmo4/DAPI	Bhlhb5/DAPI		bins	Lmo4	Bhlhb5	DAPI	Lmo4/DAPI	Bhlhb5/DAPI
	bins	Lmo4	Bhlhb5	DAPI	Lmo4/DAPI	Bhlhb5/DAPI		bins	Lmo4	Bhlhb5	DAPI	Lmo4/DAPI	Bhlhb5/DAPI		bins	Lmo4	Bhlhb5	DAPI	Lmo4/DAPI	Bhlhb5/DAPI			1	17	26	125	0.136	0.208		1	58	16	224	0.258929	0.0714286		1	54	9	167	0.323353	0.0538922
	1	113	9	208	0.543269	0.0432692		1	97	4	167	0.580838	0.0239521		1	88	3	153	0.575163	0.0196078			2	33	40	148	0.222973	0.27027		2	65	29	210	0.309524	0.138095		2	62	18	159	0.389937	0.113208
	2	115	13	225	0.511111	0.0577778		2	63	12	210	0.3	0.0571429		2	93	2	207	0.449275	0.00966184			3	65	50	142	0.457746	0.352113		3	52	85	200	0.26	0.425		3	50	33	151	0.331126	0.218543
	3	102	46	223	0.457399	0.206278		3	58	61	182	0.318681	0.335165		3	51	34	205	0.24878	0.165854			4	88	65	170	0.517647	0.382353		4	87	167	224	0.388393	0.745536		4	68	72	139	0.489209	0.517986
	4	93	87	175	0.531429	0.497143		4	90	98	156	0.576923	0.628205		4	87	54	177	0.491525	0.305085			5	71	50	171	0.415205	0.292398		5	96	197	296	0.324324	0.665541		5	87	79	186	0.467742	0.424731
	5	111	140	244	0.454918	0.57377		5	124	147	247	0.502024	0.595142		5	116	93	234	0.495726	0.397436			6	9	1	45	0.2	0.0222222		6	22	48	82	0.268293	0.585366		6	49	51	108	0.453704	0.472222
	6	26	42	56	0.464286	0.75		6	34	73	86	0.395349	0.848837		6	40	70	99	0.40404	0.707071			Total	283	232	801	0.353308	0.289638		Total	380	542	1236	0.307443	0.438511		Total	370	262	910	0.406593	0.287912
	Total	560	337	1131	0.495137	0.297966		Total	466	395	1048	0.444656	0.376908		Total	475	256	1075	0.44186	0.23814
																							CKO N2
	Ctrl N2																						bins	Lmo4	Bhlhb5	DAPI	Lmo4/DAPI	Bhlhb5/DAPI		bins	Lmo4	Bhlhb5	DAPI	Lmo4/DAPI	Bhlhb5/DAPI		bins	Lmo4	Bhlhb5	DAPI	Lmo4/DAPI	Bhlhb5/DAPI
	bins	Lmo4	Bhlhb5	DAPI	Lmo4/DAPI	Bhlhb5/DAPI		bins	Lmo4	Bhlhb5	DAPI	Lmo4/DAPI	Bhlhb5/DAPI										1	52	1	143	0.363636	0.00699301		1	107	1	212	0.504717	0.00471698		1	84	1	169	0.497041	0.00591716
	1	122	3	125	0.976	0.024		1	111	0	120	0.925	0										2	60	3	151	0.397351	0.0198675		2	92	1	183	0.502732	0.00546448		2	69	2	162	0.425926	0.0123457
	2	109	7	155	0.703226	0.0451613		2	83	1	157	0.528662	0.00636943										3	63	9	143	0.440559	0.0629371		3	99	13	215	0.460465	0.0604651		3	53	31	185	0.286486	0.167568
	3	99	34	173	0.572254	0.196532		3	69	37	143	0.482517	0.258741										4	56	30	150	0.373333	0.2		4	93	90	187	0.497326	0.481283		4	89	88	207	0.429952	0.425121
	4	117	83	157	0.745223	0.528662		4	61	72	139	0.438849	0.517986										5	74	62	176	0.420455	0.352273		5	127	157	242	0.524793	0.64876		5	111	148	256	0.433594	0.578125
	5	130	156	206	0.631068	0.757282		5	61	159	230	0.265217	0.691304										6	55	37	103	0.533981	0.359223		6	32	41	55	0.581818	0.745455		6	16	11	55	0.290909	0.2
	6	21	38	56	0.375	0.678571		6	19	26	52	0.365385	0.5										Total	360	142	866	0.415704	0.163972		Total	550	303	1094	0.502742	0.276965		Total	422	281	1034	0.408124	0.27176
	Total	598	321	872	0.68578	0.368119		Total	404	295	841	0.48038	0.350773
																							CKO N3
	Ctrl N3																						bins	Lmo4	Bhlhb5	DAPI	Lmo4/DAPI	Bhlhb5/DAPI		bins	Lmo4	Bhlhb5	DAPI	Lmo4/DAPI	Bhlhb5/DAPI		bins	Lmo4	Bhlhb5	DAPI	Lmo4/DAPI	Bhlhb5/DAPI
	bins	Lmo4	Bhlhb5	DAPI	Lmo4/DAPI	Bhlhb5/DAPI		bins	Lmo4	Bhlhb5	DAPI	Lmo4/DAPI	Bhlhb5/DAPI										1	50	2	156	0.320513	0.0128205		1	37	4	129	0.286822	0.0310078		1	41	1	116	0.353448	0.00862069
	1	96	19	139	0.690647	0.136691		1	96	15	130	0.738462	0.115385										2	52	20	159	0.327044	0.125786		2	47	20	142	0.330986	0.140845		2	61	14	156	0.391026	0.0897436
	2	117	23	160	0.73125	0.14375		2	110	19	169	0.650888	0.112426										3	82	29	187	0.438503	0.15508		3	62	45	159	0.389937	0.283019		3	61	32	157	0.388535	0.203822
	3	111	91	152	0.730263	0.598684		3	94	102	167	0.562874	0.610778										4	84	51	167	0.502994	0.305389		4	65	60	148	0.439189	0.405405		4	74	41	151	0.490066	0.271523
	4	119	150	186	0.639785	0.806452		4	113	159	204	0.553922	0.779412										5	103	74	186	0.553763	0.397849		5	78	89	153	0.509804	0.581699		5	83	90	163	0.509202	0.552147
	5	136	174	274	0.49635	0.635036		5	116	172	297	0.390572	0.579125										6	11	4	32	0.34375	0.125		6	9	2	38	0.236842	0.0526316		6	9	12	34	0.264706	0.352941
	6	26	28	80	0.325	0.35		6	26	18	55	0.472727	0.327273										Total	382	180	887	0.430665	0.202931		Total	298	220	769	0.387516	0.286086		Total	329	190	777	0.423423	0.24453
	Total	605	485	991	0.610494	0.489405		Total	555	485	1022	0.543053	0.47456
	Average ctrl1							ctrl2							ctrl3								cko1							cko2							cko3
	bins	Lmo4	Bhlhb5	DAPI	Lmo4/DAPI	Bhlhb5/DAPI		bins	Lmo4	Bhlhb5	DAPI	Lmo4/DAPI	Bhlhb5/DAPI		bins	Lmo4	Bhlhb5	DAPI	Lmo4/DAPI	Bhlhb5/DAPI			bins	Lmo4	Bhlhb5	DAPI	Lmo4/DAPI	Bhlhb5/DAPI		bins	Lmo4	Bhlhb5	DAPI	Lmo4/DAPI	Bhlhb5/DAPI		bins	Lmo4	Bhlhb5	DAPI	Lmo4/DAPI	Bhlhb5/DAPI
	1	99.3333	5.33333	176	0.564394	0.030303		1	116.5	1.5	122.5	0.95102	0.0122449		1	96	17	134.5	0.713755	0.126394			1	43	17	172	0.25	0.0988372		1	81	1	174.667	0.46374	0.00572519		1	42.6667	2.33333	133.667	0.319202	0.0174564
	2	90.3333	9	214	0.422118	0.0420561		2	96	4	156	0.615385	0.025641		2	113.5	21	164.5	0.68997	0.12766			2	53.3333	29	172.333	0.309478	0.168279		2	73.6667	2	165.333	0.445565	0.0120968		2	53.3333	18	152.333	0.350109	0.118162
	3	70.3333	47	203.333	0.345902	0.231148		3	84	35.5	158	0.531646	0.224684		3	102.5	96.5	159.5	0.642633	0.605016			3	55.6667	56	164.333	0.338742	0.340771		3	71.6667	17.6667	181	0.395948	0.0976059		3	68.3333	35.3333	167.667	0.407555	0.210736
	4	90	79.6667	169.333	0.531496	0.470472		4	89	77.5	148	0.601351	0.523649		4	116	154.5	195	0.594872	0.792308			4	81	101.333	177.667	0.45591	0.570356		4	79.3333	69.3333	181.333	0.4375	0.382353		4	74.3333	50.6667	155.333	0.478541	0.32618
	5	117	126.667	241.667	0.484138	0.524138		5	95.5	157.5	218	0.438073	0.722477		5	126	173	285.5	0.441331	0.605954			5	84.6667	108.667	217.667	0.388974	0.499234		5	104	122.333	224.667	0.462908	0.54451		5	88	84.3333	167.333	0.525896	0.503984
	6	33.3333	61.6667	80.3333	0.414938	0.767635		6	20	32	54	0.37037	0.592593		6	26	23	67.5	0.385185	0.340741			6	26.6667	33.3333	78.3333	0.340426	0.425532		6	34.3333	29.6667	71	0.483568	0.41784		6	9.66667	6	34.6667	0.278846	0.173077
	Total	500.333	329.333	1084.67	0.461278	0.303626		Total	501	308	856.5	0.584939	0.359603		Total	580	485	1006.5	0.576254	0.481868			Total	344.333	345.333	982.333	0.350526	0.351544		Total	444	242	998	0.44489	0.242485		Total	336.333	196.667	811	0.414714	0.242499
	Average ctrl																						Average CKO
	bins	Lmo4	Bhlhb5	DAPI	Lmo4/DAPI	Bhlhb5/DAPI																	bins	Lmo4	Bhlhb5	DAPI	Lmo4/DAPI	Bhlhb5/DAPI
	1	103.944	7.94444	144.333	0.720169	0.0550423																	1	55.5556	6.77778	160.111	0.346981	0.0423317
	2	99.9444	11.3333	178.167	0.56096	0.0636109																	2	60.1111	16.3333	163.333	0.368027	0.1
	3	85.6111	59.6667	173.611	0.49312	0.34368																	3	65.2222	36.3333	171	0.381417	0.212476
	4	98.3333	103.889	170.778	0.575797	0.608328																	4	78.2222	73.7778	171.444	0.456254	0.430331
	5	112.833	152.389	248.389	0.454261	0.613509																	5	92.2222	105.111	203.222	0.4538	0.517223
	6	26.4444	38.8889	67.2778	0.393064	0.578035																	6	23.5556	23	61.3333	0.384058	0.375
	Total	527.111	374.111	982.556	0.53647	0.380753																	Total	374.889	261.333	930.444	0.402914	0.280869
	ma1 ctrl	ma2 ctrl	ma3 ctrl	ma1 cko	ma2 cko	ma3 cko		ma1 ctrl	ma2 ctrl	ma3 ctrl	ma1 cko	ma2 cko	ma3 cko
	Lmo4/DAPI	Lmo4/DAPI	Lmo4/DAPI	Lmo4/DAPI	Lmo4/DAPI	Lmo4/DAPI		Bhlhb5/DAPI	Bhlhb5/DAPI	Bhlhb5/DAPI	Bhlhb5/DAPI	Bhlhb5/DAPI	Bhlhb5/DAPI
	0.564394	0.95102	0.713755	0.25	0.46374	0.319202		0.030303	0.0122449	0.126394	0.0988372	0.00572519	0.0174564
	0.422118	0.615385	0.68997	0.309478	0.445565	0.350109		0.0420561	0.025641	0.12766	0.168279	0.0120968	0.118162
	0.345902	0.531646	0.642633	0.338742	0.395948	0.407555		0.231148	0.224684	0.605016	0.340771	0.0976059	0.210736
	0.531496	0.601351	0.594872	0.45591	0.4375	0.478541		0.470472	0.523649	0.792308	0.570356	0.382353	0.32618
	0.484138	0.438073	0.441331	0.388974	0.462908	0.525896		0.524138	0.722477	0.605954	0.499234	0.54451	0.503984
	0.414938	0.37037	0.385185	0.340426	0.483568	0.278846		0.767635	0.592593	0.340741	0.425532	0.41784	0.173077
	0.461278	0.584939	0.576254	0.350526	0.44489	0.414714		0.303626	0.359603	0.481868	0.351544	0.242485	0.242499
	Error Lmo4/DAPI ctrl	Error Lmo4/DAPI CKO						Error bhlhb5/DAPI ctrl	Error bhlhb5/DAPI CKO				T-test Lmo4/DAPI	T-test Bhlhb5/DAPI
	0.112567	0.0629662						0.0354257	0.0292787				0.0365216	0.750732
	0.0798119	0.0403335						0.0316273	0.04604				0.081161	0.571372
	0.0865604	0.0212686						0.125714	0.0702522				0.230437	0.394551
	0.0222838	0.0118683						0.0996057	0.0738327				0.00932832	0.244131
	0.0148417	0.0395682						0.057547	0.014366				0.916004	0.161838
	0.0131042	0.0606414						0.123897	0.0828995				0.734637	0.200613
	0.0398516	0.0278241						0.0526266	0.0363507				0.0474457	0.183088

## Sheet: ma 315T
	Ctrl N1																						315T
	ma4		ma1							ma2													315T N1		ma1							ma2							ma3
	bins	Lmo4	Bhlhb5	DAPI	Lmo4/DAPI	Bhlhb5/DAPI		bins	Lmo4	Bhlhb5	DAPI	Lmo4/DAPI	Bhlhb5/DAPI										bins	Lmo4	Bhlhb5	DAPI	Lmo4/DAPI	Bhlhb5/DAPI		bins	Lmo4	Bhlhb5	DAPI	Lmo4/DAPI	Bhlhb5/DAPI		bins	Lmo4	Bhlhb5	DAPI	Lmo4/DAPI	Bhlhb5/DAPI
	1	83	7	145	0.572414	0.0482759		1	75	4	186	0.403226	0.0215054										1	31	26	209	0.148325	0.124402		1	67	28	236	0.283898	0.118644		1	66	32	213	0.309859	0.150235
	2	95	11	184	0.516304	0.0597826		2	94	5	200	0.47	0.025										2	54	37	242	0.22314	0.152893		2	87	23	242	0.359504	0.0950413		2	93	40	247	0.376518	0.161943
	3	100	52	188	0.531915	0.276596		3	84	71	200	0.42	0.355										3	71	66	255	0.278431	0.258824		3	82	67	250	0.328	0.268		3	91	62	254	0.358268	0.244094
	4	108	127	216	0.5	0.587963		4	106	159	228	0.464912	0.697368										4	96	71	250	0.384	0.284		4	138	78	298	0.463087	0.261745		4	136	112	262	0.519084	0.427481
	5	144	183	281	0.512456	0.651246		5	130	190	297	0.43771	0.639731										5	124	141	269	0.460967	0.524164		5	160	143	336	0.47619	0.425595		5	151	164	275	0.549091	0.596364
	6	26	49	95	0.273684	0.515789		6	13	21	76	0.171053	0.276316										6	60	102	95	0.631579	1.07368		6	79	104	154	0.512987	0.675325		6	62	78	100	0.62	0.78
	Total	556	429	1109	0.501353	0.386835		Total	502	450	1187	0.422915	0.379107										Total	436	443	1320	0.330303	0.335606		Total	613	443	1516	0.404354	0.292216		Total	599	488	1351	0.443375	0.361214
	Ctrl N2																ma3						315T N2
	bins	Lmo4	Bhlhb5	DAPI	Lmo4/DAPI	Bhlhb5/DAPI		bins	Lmo4	Bhlhb5	DAPI	Lmo4/DAPI	Bhlhb5/DAPI		bins	Lmo4	Bhlhb5	DAPI	Lmo4/DAPI	Bhlhb5/DAPI			bins	Lmo4	Bhlhb5	DAPI	Lmo4/DAPI	Bhlhb5/DAPI		bins	Lmo4	Bhlhb5	DAPI	Lmo4/DAPI	Bhlhb5/DAPI		bins	Lmo4	Bhlhb5	DAPI	Lmo4/DAPI	Bhlhb5/DAPI
	1	65	0	159	0.408805	0		1	75	6	144	0.520833	0.0416667		1	103	12	190	0.542105	0.0631579			1	73	5	161	0.453416	0.0310559		1	67	6	143	0.468531	0.041958		1	107	14	230	0.465217	0.0608696
	2	85	0	237	0.35865	0		2	92	13	174	0.528736	0.0747126		2	49	14	175	0.28	0.08			2	57	2	170	0.335294	0.0117647		2	82	17	166	0.493976	0.10241		2	104	15	239	0.435146	0.0627615
	3	80	62	242	0.330579	0.256198		3	102	52	170	0.6	0.305882		3	64	43	178	0.359551	0.241573			3	52	14	169	0.307692	0.0828402		3	94	46	173	0.543353	0.265896		3	125	48	262	0.477099	0.183206
	4	114	122	234	0.487179	0.521368		4	98	59	158	0.620253	0.373418		4	94	85	176	0.534091	0.482955			4	68	73	179	0.379888	0.407821		4	91	121	176	0.517045	0.6875		4	134	105	264	0.507576	0.397727
	5	146	168	235	0.621277	0.714894		5	87	58	157	0.55414	0.369427		5	113	99	219	0.515982	0.452055			5	101	108	206	0.490291	0.524272		5	110	147	210	0.52381	0.7		5	188	197	308	0.61039	0.63961
	6	15	24	54	0.277778	0.444444		6	4	0	28	0.142857	0		6	21	38	58	0.362069	0.655172			6	32	49	105	0.304762	0.466667		6	65	87	102	0.637255	0.852941		6	55	67	106	0.518868	0.632075
	Total	505	376	1161	0.43497	0.323859		Total	458	188	831	0.551143	0.226233		Total	444	291	996	0.445783	0.292169			Total	383	251	990	0.386869	0.253535		Total	509	424	970	0.524742	0.437113		Total	713	446	1409	0.506033	0.316537
	Ctrl N3																						315T N3
	bins	Lmo4	Bhlhb5	DAPI	Lmo4/DAPI	Bhlhb5/DAPI		bins	Lmo4	Bhlhb5	DAPI	Lmo4/DAPI	Bhlhb5/DAPI										bins	Lmo4	Bhlhb5	DAPI	Lmo4/DAPI	Bhlhb5/DAPI		bins	Lmo4	Bhlhb5	DAPI	Lmo4/DAPI	Bhlhb5/DAPI		bins	Lmo4	Bhlhb5	DAPI	Lmo4/DAPI	Bhlhb5/DAPI
	1	95	3	149	0.637584	0.0201342		1	72	4	160	0.45	0.025										1	108	1	209	0.516746	0.00478469		1	104	3	214	0.485981	0.0140187		1	111	8	196	0.566327	0.0408163
	2	82	16	170	0.482353	0.0941176		2	83	9	181	0.458564	0.0497238										2	88	2	228	0.385965	0.00877193		2	87	4	214	0.406542	0.0186916		2	112	6	212	0.528302	0.0283019
	3	77	66	166	0.463855	0.39759		3	81	41	169	0.47929	0.242604										3	67	22	251	0.266932	0.0876494		3	79	17	238	0.331933	0.0714286		3	87	39	217	0.400922	0.179724
	4	99	93	191	0.518325	0.486911		4	95	96	186	0.510753	0.516129										4	102	85	237	0.43038	0.35865		4	77	51	208	0.370192	0.245192		4	85	92	210	0.404762	0.438095
	5	102	103	193	0.528497	0.533679		5	116	107	197	0.588832	0.543147										5	167	127	284	0.588028	0.447183		5	144	109	238	0.605042	0.457983		5	134	186	247	0.54251	0.753036
	6	33	4	26	1.26923	0.153846		6	29	5	50	0.58	0.1										6	70	68	109	0.642202	0.623853		6	32	45	69	0.463768	0.652174		6	39	64	72	0.541667	0.888889
	Total	488	285	895	0.545251	0.318436		Total	476	262	943	0.504772	0.277837										Total	602	305	1318	0.456753	0.231411		Total	523	229	1181	0.442845	0.193903		Total	568	395	1154	0.492201	0.342288
	Average ctrl1							ctrl2							ctrl3								315T1							315T2							315T3
	bins	Lmo4	Bhlhb5	DAPI	Lmo4/DAPI	Bhlhb5/DAPI		bins	Lmo4	Bhlhb5	DAPI	Lmo4/DAPI	Bhlhb5/DAPI		bins	Lmo4	Bhlhb5	DAPI	Lmo4/DAPI	Bhlhb5/DAPI			bins	Lmo4	Bhlhb5	DAPI	Lmo4/DAPI	Bhlhb5/DAPI		bins	Lmo4	Bhlhb5	DAPI	Lmo4/DAPI	Bhlhb5/DAPI		bins	Lmo4	Bhlhb5	DAPI	Lmo4/DAPI	Bhlhb5/DAPI
	1	79	5.5	165.5	0.477341	0.0332326		1	81	6	164.333	0.492901	0.0365112		1	83.5	3.5	154.5	0.540453	0.0226537			1	54.6667	28.6667	219.333	0.24924	0.130699		1	82.3333	8.33333	178	0.462547	0.0468165		1	107.667	4	206.333	0.521809	0.0193861
	2	94.5	8	192	0.492188	0.0416667		2	75.3333	9	195.333	0.385666	0.0460751		2	82.5	12.5	175.5	0.470085	0.0712251			2	78	33.3333	243.667	0.320109	0.136799		2	81	11.3333	191.667	0.422609	0.0591304		2	95.6667	4	218	0.438838	0.0183486
	3	92	61.5	194	0.474227	0.31701		3	82	52.3333	196.667	0.416949	0.266102		3	79	53.5	167.5	0.471642	0.319403			3	81.3333	65	253	0.321476	0.256917		3	90.3333	36	201.333	0.448675	0.178808		3	77.6667	26	235.333	0.330028	0.110482
	4	107	143	222	0.481982	0.644144		4	102	88.6667	189.333	0.538732	0.46831		4	97	94.5	188.5	0.514589	0.501326			4	123.333	87	270	0.45679	0.322222		4	97.6667	99.6667	206.333	0.473344	0.483037		4	88	76	218.333	0.403053	0.348092
	5	137	186.5	289	0.474048	0.645329		5	115.333	108.333	203.667	0.566285	0.531915		5	109	105	195	0.558974	0.538462			5	145	149.333	293.333	0.494318	0.509091		5	133	150.667	241.333	0.551105	0.624309		5	148.333	140.667	256.333	0.578674	0.548765
	6	19.5	35	85.5	0.22807	0.409357		6	13.3333	20.6667	46.6667	0.285714	0.442857		6	31	4.5	38	0.815789	0.118421			6	67	94.6667	116.333	0.575931	0.813754		6	50.6667	67.6667	104.333	0.485623	0.648562		6	47	59	83.3333	0.564	0.708
	Total	529	439.5	1148	0.460801	0.38284		Total	469	285	996	0.470884	0.286145		Total	482	273.5	919	0.524483	0.297606			Total	549.333	458	1395.67	0.393599	0.328159		Total	535	373.667	1123	0.476402	0.33274		Total	564.333	309.667	1217.67	0.463455	0.254312
	Average ctrl																						Average 315T
	bins	Lmo4	Bhlhb5	DAPI	Lmo4/DAPI	Bhlhb5/DAPI																	bins	Lmo4	Bhlhb5	DAPI	Lmo4/DAPI	Bhlhb5/DAPI
	1	81.1667	5	161.444	0.502753	0.0309704																	1	81.5556	13.6667	201.222	0.405301	0.0679183
	2	84.1111	9.83333	187.611	0.448327	0.0524134																	2	84.8889	16.2222	217.778	0.389796	0.0744898
	3	84.3333	55.7778	186.056	0.45327	0.299791																	3	83.1111	42.3333	229.889	0.361527	0.184147
	4	102	108.722	199.944	0.510142	0.543762																	4	103	87.5556	231.556	0.444818	0.378119
	5	120.444	133.278	229.222	0.525448	0.581435																	5	142.111	146.889	263.667	0.53898	0.557101
	6	21.2778	20.0556	56.7222	0.375122	0.353575																	6	54.8889	73.7778	101.333	0.541667	0.72807
	Total	493.333	332.667	1021	0.483186	0.325824																	Total	549.556	380.444	1245.44	0.441253	0.305469
	ma1 ctrl	ma2 ctrl	ma3 ctrl	ma1 315T	ma2 315T	ma3 315T		ma1 ctrl	ma2 ctrl	ma3 ctrl	ma1 315T	ma2 315T	ma3 315T
	Lmo4/DAPI	Lmo4/DAPI	Lmo4/DAPI	Lmo4/DAPI	Lmo4/DAPI	Lmo4/DAPI		Bhlhb5/DAPI	Bhlhb5/DAPI	Bhlhb5/DAPI	Bhlhb5/DAPI	Bhlhb5/DAPI	Bhlhb5/DAPI
	0.477341	0.492901	0.540453	0.24924	0.462547	0.521809		0.0332326	0.0365112	0.0226537	0.130699	0.0468165	0.0193861
	0.492188	0.385666	0.470085	0.320109	0.422609	0.438838		0.0416667	0.0460751	0.0712251	0.136799	0.0591304	0.0183486
	0.474227	0.416949	0.471642	0.321476	0.448675	0.330028		0.31701	0.266102	0.319403	0.256917	0.178808	0.110482
	0.481982	0.538732	0.514589	0.45679	0.473344	0.403053		0.644144	0.46831	0.501326	0.322222	0.483037	0.348092
	0.474048	0.566285	0.558974	0.494318	0.551105	0.578674		0.645329	0.531915	0.538462	0.509091	0.624309	0.548765
	0.22807	0.285714	0.815789	0.575931	0.485623	0.564		0.409357	0.442857	0.118421	0.813754	0.648562	0.708
	0.460801	0.470884	0.524483	0.393599	0.476402	0.463455		0.38284	0.286145	0.297606	0.328159	0.33274	0.254312
	Error Lmo4/DAPI ctrl	Error Lmo4/DAPI 315T						Error bhlhb5/DAPI ctrl	Error bhlhb5/DAPI 315T				T-test Lmo4/DAPI	T-test Bhlhb5/DAPI
	0.018983	0.0827667						0.00418124	0.0334824				0.337863	0.360228
	0.0324569	0.0371677						0.00920644	0.0347419				0.323924	0.634996
	0.0186766	0.0410488						0.017382	0.0423037				0.1242	0.0602459
	0.016443	0.0212164						0.0539571	0.0498559				0.0660635	0.104933
	0.0296024	0.0248335						0.0367621	0.0337937				0.841122	0.83381
	0.187041	0.0283244						0.103017	0.0483074				0.62954	0.0245697
	0.0197624	0.0257162						0.0305014	0.0254136				0.275781	0.688415

## Sheet: summary
	Lmo4/DAPI	Lmo4/DAPI	Lmo4/DAPI	Lmo4/DAPI	Lmo4/DAPI	Lmo4/DAPI		Lmo4/DAPI	Lmo4/DAPI	Lmo4/DAPI	Lmo4/DAPI	Lmo4/DAPI	Lmo4/DAPI
	ma1 ctrl	ma2 ctrl	ma3 ctrl	ma1 315T	ma2 315T	ma3 315T		sa1 ctrl	sa2 ctrl	sa3 ctrl	sa1 315T	sa2 315T	sa3 315T
Total bins	0.460801	0.470884	0.524483	0.393599	0.476402	0.463455	Total bins	0.204545	0.17374	0.12	0.136128	0.260086	0.124572
	Bhlhb5/DAPI	Bhlhb5/DAPI	Bhlhb5/DAPI	Bhlhb5/DAPI	Bhlhb5/DAPI	Bhlhb5/DAPI		Bhlhb5/DAPI	Bhlhb5/DAPI	Bhlhb5/DAPI	Bhlhb5/DAPI	Bhlhb5/DAPI	Bhlhb5/DAPI
	ma1 ctrl	ma2 ctrl	ma3 ctrl	ma1 315T	ma2 315T	ma3 315T		sa1 ctrl	sa2 ctrl	sa3 ctrl	sa1 315T	sa2 315T	sa3 315T				Average summary for total cells
Total bins	0.38284	0.286145	0.297606	0.328159	0.33274	0.254312	Total bins	0.571901	0.632626	0.514444	0.478261	0.536041	0.475375
																	ctrl	ctrl	cko	cko
																	Lmo4/DAPI	Bhlhb5/DAPI	Lmo4/DAPI	Bhlhb5/DAPI
																sa	0.109161	0.594574	0.136483	0.609021
	Lmo4/DAPI	Lmo4/DAPI	Lmo4/DAPI	Lmo4/DAPI	Lmo4/DAPI	Lmo4/DAPI		Lmo4/DAPI	Lmo4/DAPI	Lmo4/DAPI	Lmo4/DAPI	Lmo4/DAPI	Lmo4/DAPI			ma	0.53647	0.380753	0.402914	0.280869
	ma1 ctrl	ma2 ctrl	ma3 ctrl	ma1 cko	ma2 cko	ma3 cko		sa1 ctrl	sa2 ctrl	sa3 ctrl	sa1 cko	sa2 cko	sa3 cko			Error SA	0.0339187	0.0312272	0.00298216	0.0260732
Total bins	0.461278	0.584939	0.576254	0.350526	0.44489	0.414714	Total bins	0.179505	0.0782637	0.0772418	0.139776	0.138119	0.130117			Error MA	0.0398516	0.0526266	0.0278241	0.0363507
	Bhlhb5/DAPI	Bhlhb5/DAPI	Bhlhb5/DAPI	Bhlhb5/DAPI	Bhlhb5/DAPI	Bhlhb5/DAPI		Bhlhb5/DAPI	Bhlhb5/DAPI	Bhlhb5/DAPI	Bhlhb5/DAPI	Bhlhb5/DAPI	Bhlhb5/DAPI
	ma1 ctrl	ma2 ctrl	ma3 ctrl	ma1 cko	ma2 cko	ma3 cko		sa1 ctrl	sa2 ctrl	sa3 ctrl	sa1 cko	sa2 cko	sa3 cko
Total bins	0.303626	0.359603	0.481868	0.351544	0.242485	0.242499	Total bins	0.65772	0.58073	0.553418	0.578009	0.597823	0.66423
			Average summary for total cells ctrl & cKO MA vs SA													Average summary for total cells ctrl & 315T MA vs SA
			ctrl	ctrl	cko	cko											ctrl	ctrl	315T	315T
			Lmo4/DAPI	Bhlhb5/DAPI	Lmo4/DAPI	Bhlhb5/DAPI											Lmo4/DAPI	Bhlhb5/DAPI	Lmo4/DAPI	Bhlhb5/DAPI
		sa	0.109161	0.594574	0.136483	0.609021										sa	0.164183	0.569493	0.172774	0.496177
		ma	0.53647	0.380753	0.408179	0.303325										ma	0.483186	0.325824	0.441253	0.305469
		Error SA	0.0339187	0.0312272	0.00298216	0.0260732										Error SA	0.0247037	0.0341204	0.0433738	0.0197585
		Error MA	0.0398516	0.0526266	0.0278241	0.0372869										Error MA	0.0197624	0.0305014	0.0257162	0.0254136
		T-test	0.00120475	0.0243824	0.000670224	0.00171001										T=test	0.000542252	0.005399	0.00579872	0.00400694
			***	*	***	**											***	**	**	**

## Sheet: Number of barrels
																ctrl	nb of barrels		cko	nb of barrels
	ctrl	nb of barrels		315T	nb of barrels											ctrl1.1	15		cko 1 sa1	18
	ctrl1.1	26		315T N1.1	38											ctrl1.2	16		cko 1 sa2	13
	ctrl1.2	16		315T N1.2	14											ctrl1.3	19		cko 1 sa3	16
	ctrl1.3	17		315T N2 SA1	30
	ctrl2.1	10		315T N2SA2	16											ctrl2.1	12		cko 2 sa1	10
	ctrl2.2	28		315T N3 sa1	25											ctrl2.2	18		cko2 SA2	9
	ctrl2.3	27		315T N3 SA2	17														cko2 SA3	11
	ctrl3.1	12														ctrl3.1	12
	ctrl3.2	16														ctrl3.2	16		cko3 sa1	10
																ctrl 3.3	14		CKO3 Sa2	15
	ctrl1	19.6667		315T1	26
	ctrl2	21.6667		315T2	23											ctrl1	16.6667		CKO1	15.6667
	ctrl3	14		315T3	21											ctrl2	15		CKO2	10
	AVERAGE ctrl	18.4444		AVERAGE 315T	23.3333											ctrl3	14		CKO3	12.5
	ERROR ctrl	2.296		ERROR 315T	1.45297											AVERAGE ctrl	15.2222		AVERAGE CKO	12.7222
				T-test	0.146359											ERROR ctrl	0.777778		ERROR CKO	1.63959
																			T-test	0.240376
	AVERAGE ctrl	18.4444
	AVERAGE 315T	23.3333														AVERAGE ctrl	15.2222
	ERROR ctrl	2.296														AVERAGE CKO	12.7222
	ERROR 315T	1.45297														ERROR ctrl	0.777778
																ERROR CKO	1.63959
