# Supplementary material for: Pum2 and TDP-43 refine area-specific cytoarchitecture post-mitotically and modulate translation of Sox5, Bcl11b, and Rorb mRNAs in developing mouse neocortex
Source: eLife. 2022 Mar 9;11:e55199. doi: 10.7554/eLife.55199 (PMC8906809; doi:10.7554/eLife.55199)
Supplement: Source data 12. — Quantification of the fraction of Sox5+, Bcl11b+, or Rorβ+ neurons among all transfected neurons with plasmids encoding either control GFP, TDP43, or TDP43A315T. At least 50 cells were counted for each replicate of every transfection. Data are shown as means ± standard error of the mean (SEM), n = 3 for each transfection. *p≤0.05, **p≤0.01, ***p≤0.001, two-tailed t-test. [file elife-55199-data12.xlsx]

## Sheet: Sox5
	Transfection with Control GFP						Transfection with Flag- hTdp43- V5 stained with anti V5						Transfection with Flag- hTdp43 A315T- V5 stained with anti V5
	Replicate 1-N1						Replicate 1-N1						Replicate 1-N1
	Image	Transfected cells	trans Sox5+	trans SOX5+/Trans			Image	Transfected cells	trans Sox5+	trans SOX5+/Trans			Image	Transfected cells	trans Sox5+	trans SOX5+/Trans
	1	155	100	0.645161			1	23	23	1			1	13	13	1
	2	98	82	0.836735			2	39	37	0.948718			2	32	32	1
	Average	126.5	91	0.740948			3	68	67	0.985294			3	45	45	1
							4	68	65	0.955882			Average	30	30	1
	Replicate 2-N2						5	60	57	0.95
	Image	Transfected cells	trans Sox5+	trans SOX5+/Trans			Average	51.6	49.8	0.967979			Replicate 2-N2
	1	125	106	0.848									Image	Transfected cells	trans Sox5+	trans SOX5+/Trans
	2	56	39	0.696429			Replicate 2-N2						1	80	80	1
	Average	90.5	72.5	0.772214			Image	GFP	GFP Sox5	GFPSOX5/GFP			2	123	123	1
							1	29	29	1			3	91	91	1
	Replicate 3-N3						2	51	49	0.960784			Average	98	98	1
	Image	Transfected cells	trans Sox5+	trans SOX5+/Trans			3	68	64	0.941176
	1	149	119	0.798658			Average	49.3333	47.3333	0.96732			Replicate 3-N3
	2	108	83	0.768519									Image	Transfected cells	trans Sox5+	trans SOX5+/Trans
	Average	128.5	101	0.783588			Replicate 3-N3						1	36	33	0.916667
							Image	GFP	GFP Sox5	GFPSOX5/GFP			2	106	101	0.95283
							1	59	54	0.915254			3	6	6	1
							2	44	40	0.909091			Average	49.3333	46.6667	0.956499
		Fraction of Sox5+ (Transfected)					3	31	28	0.903226
	Ctrl	hTDP-43	hTDP43 A315T				Average	44.6667	40.6667	0.90919
N1	0.740948	0.967979	1
N2	0.772214	0.96732	1	T-test between 2 TDP alleles
N3	0.783588	0.90919	0.956499	0.199083
							Fraction of Sox5+ (Transfected)
	Ctrl	hTDP-43	hTDP43 A315T			Ctrl	hTDP-43	hTDP43 A315T
Average	0.765583	0.948163	0.9855		% Average	76.5583	94.8163	98.55
Error	0.0127478	0.0194873	0.0145003		% Error	1.27478	1.94873	1.45003
T-test		0.00142914	0.000338848
Stars		***	***

## Sheet: Rorb
		Transfection with Control GFP						Transfection with Flag- hTdp43- V5 stained with anti Flag						Transfection with Flag- hTdp43 A315T- V5 stained with anti Flag
		Replicate 1-N1						Replicate 1-N1						Replicate 1-N1
		Image	Transfected cells	trans Rorb+	trans Rorb+/Trans			Image	Transfected cells	trans Rorb+	trans Rorb+/Trans			Image	Transfected cells	trans Rorb+	trans Rorb+/Trans
		1	68	39	0.573529			1	44	30	0.681818			1	27	13	0.481481
		2	25	19	0.76			2	139	68	0.489209			2	38	20	0.526316
		Average	46.5	29	0.666765			Average	91.5	49	0.585513			Average	32.5	16.5	0.503899
		Replicate 2-N2						Replicate 2-N2						Replicate 2-N2
		Image	Transfected cells	trans Rorb+	trans Rorb+/Trans			Image	Transfected cells	trans Rorb+	trans Rorb+/Trans			Image	Transfected cells	trans Rorb+	trans Rorb+/Trans
		1	34	21	0.617647			1	211	123	0.582938			1	185	70	0.378378
		2	42	34	0.809524			2	86	55	0.639535			2	47	30	0.638298
		Average	38	27.5	0.713585			Average	148.5	89	0.611237			Average	116	50	0.508338
		Replicate 3-N3						Replicate 3-N3						Replicate 3-N3
		Image	Transfected cells	trans Rorb+	trans Rorb+/Trans			Image	Transfected cells	trans Rorb+	trans Rorb+/Trans			Image	Transfected cells	trans Rorb+	trans Rorb+/Trans
		1	115	56	0.486957			1	268	154	0.574627			1	137	55	0.40146
		2	42	38	0.904762			2	135	87	0.644444			2	56	37	0.660714
		Average	78.5	47	0.695859			Average	201.5	120.5	0.609536			Average	96.5	46	0.531087
				Fraction of Rorb+ (Transfected)
		Average	Ctrl	hTDP-43	hTDP43 A315T
		N1	0.666765	0.585513	0.503899
		N2	0.713585	0.611237	0.508338	T-test between 2 TDP alleles
		N3	0.695859	0.609536	0.531087	0.00176888
						**
									Fraction of Rorb+ (Transfected)
			Ctrl	hTDP-43	hTDP43 A315T			Ctrl	hTDP-43	hTDP43 A315T
		Average	0.69207	0.602095	0.514441		% Average	69.207	60.2095	51.4441
		Error	0.0136481	0.00830544	0.00842099		% Error	1.36481	0.830544	0.842099
		T-test		0.00489127	0.000377878
		Stars		**	***

## Sheet: Ctip2
		Transfection with Control GFP						Transfection with Flag- hTdp43- V5 stained with anti V5						Transfection with Flag- hTdp43 A315T- V5 stained with anti V5
		Replicate 1-N1						Replicate 1-N1						Replicate 1-N1
	Image	Transfected cells	trans Ctip2+	trans Ctip2+/Trans			Image	Transfected cells	trans Ctip2+	trans Ctip2+/Trans			Image	Transfected cells	trans Ctip2+	trans Ctip2+/Trans
	1	95	71	0.747368			1	18	16	0.888889			1	35	30	0.857143
	2	74	55	0.743243			2	45	42	0.933333			2	28	27	0.964286
	3	79	50	0.632911			Average	31.5	29	0.911111			Average	31.5	28.5	0.910714
	Average	82.6667	58.6667	0.707841
		Replicate 2-N2						Replicate 2-N2						Replicate 2-N2
	Image	Transfected cells	trans Ctip2+	trans Ctip2+/Trans			Image	Transfected cells	trans Ctip2+	trans Ctip2+/Trans			Image	Transfected cells	trans Ctip2+	trans Ctip2+/Trans
	1	31	23	0.741935			1	63	60	0.952381			1	55	44	0.8
	2	67	31	0.462687			2	21	17	0.809524			2	28	28	1
	3	45	20	0.444444			Average	42	38.5	0.880952			3	30	29	0.966667
	Average	47.6667	24.6667	0.549689									Average	37.6667	33.6667	0.922222
		Replicate 3-N3						Replicate 3-N3						Replicate 3-N3
	Image	Transfected cells	trans Ctip2+	trans Ctip2+/Trans			Image	Transfected cells	trans Ctip2+	trans Ctip2+/Trans			Image	Transfected cells	trans Ctip2+	trans Ctip2+/Trans
	1	61	51	0.836066			1	230	200	0.869565			1	57	47	0.824561
	2	83	59	0.710843			2	215	175	0.813953			2	55	47	0.854545
	Average	72	55	0.773454			Average	222.5	187.5	0.841759			3	54	46	0.851852
													Average	55.3333	46.6667	0.843653
			Fraction of Ctip2+ (Transfected)
		Ctrl	hTDP-43	hTDP43 A315T
	N1	0.707841	0.911111	0.910714
	N2	0.549689	0.880952	0.922222	T-test between 2 TDP alleles
	N3	0.773454	0.841759	0.843653	0.675972
								Fraction of Ctip2+ (Transfected)
		Ctrl	hTDP-43	hTDP43 A315T			Ctrl	hTDP-43	hTDP43 A315T
	Average	0.676995	0.877941	0.892196		% Average	67.6995	87.7941	89.2196
	Error	0.0664113	0.0200767	0.0244981		% Error	6.64113	2.00767	2.44981
	T-test		0.0442807	0.0383953
	Stars		*	*
