# Supplementary material for: Pum2 and TDP-43 refine area-specific cytoarchitecture post-mitotically and modulate translation of Sox5, Bcl11b, and Rorb mRNAs in developing mouse neocortex
Source: eLife. 2022 Mar 9;11:e55199. doi: 10.7554/eLife.55199 (PMC8906809; doi:10.7554/eLife.55199)
Supplement: Source data 13. — Quantification of results from Pum2fl/flor WT brains at P0 electroporated at E13,5 with pNeuroD-IRES-GFP as control, or with p-NeuroD-IRES-Cre-GFP to ablate Pum2 expression (Figure 7a) or p-NeuroD-TDP43-IRES-GFP or p-NeuroD-TDP43A315T-IRES-GFP to overexpress hTDP-43 alleles (Figure 7b) only in post-mitotic neurons. The fraction of Sox5+, Bcl11b+, or Rorβ+ neurons among all electroporated cells was quantified. Data are shown as means ± standard error of the mean (SEM), n = 3 for each electroporation. Both p-NeuroD-IRES-Cre-GFP and hTDP-43 alleles were co-electroporated with T-dimer (red) to distinguish them from littermate control brains electroporated only with pNeuroD-IRES-GFP. For both hTDP-43 alleles, the respective control littermates for each variant were combined to a total of n = 6 for pNeuroD-IRES-GFP electroporations. **p≤0.01, ***p≤0.001, two-tailed t-test. [file elife-55199-data13.xlsx]

## Sheet: Sox5
		Pum 2 flox P0 electroporated at E13 with pneuroD GFP					Pum 2 flox P0 electroporated at E13 with pneuroD Cre GFP						P0 wt electroporated at E13 with pneuroD GFP					P0 wt electroporated at E13 with pneuroD -hTDP43-GFP							P0 wt electroporated at E13 with pneuroD -hTDP43-A315T-GFP
							GFP	GFP Sox5	GFPSOX5/GFP			N1	GFP	GFP Sox5	GFPSOX5/GFP			N1	GFP	GFPSOX5	GFPSOX5/GFP			N1	GFP	GFPSOX5	GFPSOX5/GFP
		GFP	GFP SOX5	GFP SOX5/GFP		N1						img1	341	35	0.102639			img1	197	129	0.654822			img1	326	105	0.322086
	N1					img1	172	38	0.22093			img2	235	24	0.102128			img2	210	88	0.419048			img2	109	59	0.541284
	img1	757	99	0.130779		img2	338	160	0.473373			img3	137	11	0.080292			img3	163	68	0.417178			img3	189	109	0.57672
	img2	275	85	0.309091		img3	315	177	0.561905			img4	155	29	0.187097			img4	407	174	0.427518			Average	208	91	0.48003
	img3	300	72	0.24		Average	275	125	0.418736			Average	217	24.75	0.118039			Average	244.25	114.75	0.479642
	Average	444	85.3333	0.226623								N2												N2	GFP	GFPSOX5	GFPSOX5/GFP
	N2					N2						img1	230	12	0.0521739			N2	GFP	GFPSOX5	GFPSOX5/GFP			img1	82	37	0.45122
	img1	241	67	0.278008		img1	110	23	0.209091			img2	420	25	0.0595238			img1	417	201	0.482014			img2	212	98	0.462264
	img2	282	73	0.258865		img2	321	234	0.728972			img3	278	4	0.0143885			img2	377	145	0.384615			img3	362	105	0.290055
	img3	193	45	0.233161		img3	316	93	0.294304			Average	309.333	13.6667	0.0420287			img3	358	106	0.296089			Average	218.667	80	0.40118
	Average	238.667	61.6667	0.256678		Average	249	116.667	0.410789									Avergae	384	150.667	0.387573
	N3											N3												N3	GFP	GFPSOX5	GFPSOX5/GFP
	img1	863	183	0.212051		N3						img1	223	9	0.0403587			N3	GFP	GFPSOX5	GFPSOX5/GFP			img1	134	46	0.343284
	img2	760	156	0.205263		img1	397	250	0.629723			img2	233	44	0.188841			img1	342	100	0.292398			img2	208	150	0.721154
	img3	642	120	0.186916		img2	86	32	0.372093			img3	183	31	0.169399			img2	413	146	0.353511			img3	277	178	0.642599
	Average	755	153	0.20141		Average	241.5	141	0.500908			img4	238	56	0.235294			img3	437	170	0.389016			Average	206.333	124.667	0.569012
												Average	219.25	35	0.158473			Avergae	397.333	138.667	0.344975
	pNeuroD GFP	pNeuoD Cre GFP	T-test
N1	0.226623	0.418736	0.00283396
N2	0.256678	0.410789										N4	GFP	GFP Sox5	GFPSOX5/GFP
N3	0.20141	0.500908										img1	119	20	0.168067
Average	0.228237	0.443478										img2	47	4	0.0851064
Std Error	0.0130435	0.0235206										img3	135	28	0.207407
												Average	100.333	17.3333	0.153527
													GFP	GFP Sox5	GFPSOX5/GFP
												N5
												img1	245	62	0.253061
												img2	455	123	0.27033
												img3	349	34	0.0974212
												img4	271	55	0.202952
												Average	330	68.5	0.205941
												N6	GFP	GFP Sox5	GFPSOX5/GFP
												img1	235	50	0.212766
												img2	56	17	0.303571
												img3	216	29	0.134259
												Average	169	32	0.216866
												PNeuroD GFP	pNeuroD hTDP-43	pNEuroD hTDP-43 A315T
												0.118039	0.479642	0.48003
												0.0420287	0.387573	0.40118
												0.158473	0.344975	0.569012
												0.153527
												0.205941
												0.216866
											Average	0.149146	0.404063	0.483407
											Error	0.0237812	0.0397397	0.0484785
											T-test		0.000885637	0.000268095
													***	***
											T-test between hTDP-43 and hTD-43 A315T			0.274302

## Sheet: Ctip2
	Pum 2 flox P0 electroporated at E13 with pneuroD GFP					Pum 2 flox P0 electroporated at E13 with pneuroD Cre GFP						P0 wt electroporated at E13 with pneuroD GFP					P0 wt electroporated at E13 with pneuroD -hTDP43-GFP						P0 wt electroporated at E13 with pneuroD -hTDP43-A315T-GFP
	N1	GFP	GFP CTIP2	GFP CTIP2/GFP		N1	GFP	GFP CTIP2	GFP CTIP2/GFP		N1	GFP	GFP CTIP2	GFP CTIP2/GFP			N1	GFP	GFP CTIP2	GFP CTIP2/GFP			N1	GFP	GFP Ctip2	GFP Ctip2/GFP
	img1	666	14	0.021021		img1	374	24	0.0641711		img1	537	3	0.00558659			img1	313	17	0.0543131			img1	309	22	0.0711974
	img2	288	3	0.0104167		img2	139	9	0.0647482		img2	305	13	0.042623			img2	580	45	0.0775862			img2	345	51	0.147826
	Img3	731	16	0.0218878		img3	415	25	0.060241		Average	421	8	0.0241048			img3	519	22	0.0423892			img3	397	30	0.0755668
	AVERAGE	561.667	11	0.0177752		AVERAGE	309.333	19.3333	0.0630534								Average	470.667	28	0.0580962			Average	350.333	34.3333	0.0981967
											N2	GFP	GFP CTIP2	GFP CTIP2/GFP
	N2	GFP	GFP CTIP2	GFP CTIP2/GFP		N2	GFP	GFP CTIP2	GFP CTIP2/GFP		img1	527	11	0.0208729			N2	GFP	GFP CTIP2	GFP CTIP2/GFP			N2	GFP	GFP CTIP2	GFP CTIP2/GFP
	img1	316	12	0.0379747		img1	148	12	0.0810811		img2	585	7	0.0119658			img1	255	39	0.152941			img1	247	36	0.145749
	img2	408	4	0.00980392		img2	46	8	0.173913		Average	556	9	0.0164193			img2	404	33	0.0816832			img2	226	23	0.10177
	Img3	389	5	0.0128535		Img3	178	6	0.0337079								img3	301	24	0.0797342			img3	584	44	0.0753425
	AVERAGE	371	7	0.0202107		AVERAGE	124	8.66667	0.096234		N3	GFP	GFP CTIP2	GFP CTIP2/GFP			Average	320	32	0.104786			Average	352.333	34.3333	0.10762
											img1	281	2	0.00711744
	N3	GFP	GFP CTIP2	GFP CTIP2/GFP		N3	GFP	GFP CTIP2	GFP CTIP2/GFP		img2	363	18	0.0495868			N3	GFP	GFP CTIP2	GFP CTIP2/GFP			N3	GFP	GFP CTIP2	GFP CTIP2/GFP
	img1	683	18	0.0263543		img1	198	20	0.10101		Average	322	10	0.0283521			img1	374	17	0.0454545			img1	578	36	0.0622837
	img2	869	25	0.0287687		img2	274	15	0.0547445								img2	396	30	0.0757576			img2	441	28	0.0634921
	Img3	657	5	0.00761035		Img3	178	11	0.0617978		N4	GFP	GFP CTIP2	GFP CTIP2/GFP			img3	433	29	0.0669746			img3	204	24	0.117647
	AVERAGE	736.333	16	0.0209111		AVERAGE	216.667	15.3333	0.0725175		img1	701	44	0.0627675			Average	401	25.3333	0.0627289			Average	407.667	29.3333	0.081141
											img2	290	5	0.0172414
	pNeuroD GFP	pNeuoD Cre GFP	T-test								img3	102	0	0
N1	0.0177752	0.0630534	0.00435766	**							Average	364.333	16.3333	0.0266696
N2	0.0202107	0.096234															PNeuroD GFP	pNeuroD hTDP-43	pNeuroD hTDP-43 A315T
N3	0.0209111	0.0725175									N5	GFP	GFP CTIP2	GFP CTIP2/GFP			0.0241048	0.0580962	0.0981967
Average	0.0196323	0.0772683									img1	120	1	0.00833333			0.0164193	0.104786	0.10762
Std Error	0.000775948	0.00805764									img2	444	24	0.0540541			0.0283521	0.0627289	0.081141
											img3	538	24	0.0446097			0.0266696
											Average	367.333	16.3333	0.0356657			0.0356657
																	0.024163
											N6	GFP	GFP CTIP2	GFP CTIP2/GFP			0.0183857
											img1	294	4	0.0136054		Average	0.0248229	0.0752038	0.0956527
											img2	301	15	0.0498339		Std Error	0.00242232	0.0148516	0.00774909
											img3	221	2	0.00904977		T-test		0.000810609	2.45839e-06
											Average	272	7	0.024163				***	***
																T-test between hTDP-43 and hTD-43 A315T			0.28923
											N7	GFP	GFP CTIP2	GFP CTIP2/GFP
											img1	151	2	0.013245
											img2	291	7	0.024055
											img3	112	2	0.0178571
											Average	184.667	3.66667	0.0183857

## Sheet: Rorb
Pum 2 flox P0 electroporated at E13 with pneuroD GFP					Pum 2 flox P0 electroporated at E13 with pneuroD Cre GFP						P0 wt electroporated at E13 with pneuroD GFP					P0 wt electroporated at E13 with pneuroD -hTDP43-GFP						P0 wt electroporated at E13 with pneuroD -hTDP43-A315T-GFP
N1					N1						N1					N1						N1
img1	393	35	0.0890585		img1	365	8	0.0219178			img1	259	33	0.127413		img1	324	12	0.037037			img1	317	14	0.044164
img2	167	36	0.215569		img2	271	8	0.0295203			img2	345	35	0.101449		img2	537	44	0.0819367			img2	267	10	0.0374532
Img3	50	5	0.1		Img3	268	14	0.0522388			Average	302	34	0.114431		Average	430.5	28	0.0594869			Average	292	12	0.0408086
AVERAGE	203.333	25.3333	0.134876		AVERAGE	301.333	10	0.034559
											N2					N2						N2
N2					N2						img1	503	36	0.0715706		img1	503	23	0.0457256			img1	170	6	0.0352941
img1	145	19	0.131034		img1	250	15	0.06			img2	437	42	0.0961098		img2	555	39	0.0702703			img2	344	14	0.0406977
img2	157	28	0.178344		img2	529	22	0.0415879			Average	470	39	0.0838402		Average	529	31	0.057998			img3	229	9	0.0393013
Img3	151	19	0.125828		Average	389.5	18.5	0.050794														Average	247.667	9.66667	0.038431
AVERAGE	151	22	0.145069													N3
					N3						N3					img1	323	15	0.0464396			N3
N2					img1	444	19	0.0427928			img1	368	25	0.0679348		img2	289	20	0.0692042			img1	699	30	0.0429185
img1	180	17	0.0944444		img2	349	15	0.0429799			Img2	234	27	0.115385		Average	306	17.5	0.0578219			img2	424	23	0.0542453
img2	439	42	0.095672		Average	396.5	17	0.0428864			Average	301	26	0.0916597								img3	317	16	0.0504732
Img3	481	63	0.130977																			Average	480	23	0.0492123
AVERAGE	366.667	40.6667	0.107031								N4
											img1	109	15	0.137615			PNeuroD GFP	pNeuroD hTDP-43	pNeuroD hTDP-43 A315T
	pNeuroD GFP	pNeuoD Cre GFP									img2	539	37	0.0686456			0.114431	0.0594869	0.0408086
N1	0.134876	0.034559									Average	324	26	0.10313			0.0838402	0.057998	0.038431
N2	0.145069	0.050794															0.0916597	0.0578219	0.0492123
N3	0.107031	0.0428864									N5						0.10313
Average	0.128992	0.0427464	T-test	0.00217576							img1	337	44	0.130564			0.114683
Std Error	0.00928175	0.00382705									img2	334	33	0.0988024			0.119105
											Average	335.5	38.5	0.114683		Average	0.104475	0.0584356	0.0428173
																Std Error	0.00580002	0.000528097	0.00327033
											N6					T-test		0.000989173	0.000203886
											img1	214	19	0.088785				***	***
											img2	348	52	0.149425		T-test between hTDP-43 and hTD-43 A315T			0.00920781	**
											Average	281	35.5	0.119105
