# Supplementary material for: Pum2 and TDP-43 refine area-specific cytoarchitecture post-mitotically and modulate translation of Sox5, Bcl11b, and Rorb mRNAs in developing mouse neocortex
Source: eLife. 2022 Mar 9;11:e55199. doi: 10.7554/eLife.55199 (PMC8906809; doi:10.7554/eLife.55199)
Supplement: Source data 14. — qRT-PCR of RNA derived from P0 somatosensory area-enriched cortical lysates for Pum2 cKO (Figure 8a) or TDP43A315T (Figure 8b). The fold change for Sox5, Bcl11b, Rorb, and Fezf2 mRNAs normalized to GAPDH mRNA is shown for mutants relative to respective control samples (Ctrl). Data are displayed as means ± standard error of the mean (SEM) for at least n = 4 of each genotype. [file elife-55199-data14.xlsx]

## Sheet: Pum2 CKO (a)
P0	CTs							P0 SA	Fold Change To GAPDH							Fold ChangePum2 CKO to ctrl								Fold Change ctrl to average ctrl
	ctrl1 GAPDH	ctrl1 Sox5	ctrl1 Ctip2	ctrl1 rorb	ctrl1 Fezf2				GAPDH	Sox5	Ctip2	Rorb	Fezf2				GAPDH	Sox5	Ctip2	Rorb	Fezf2				GAPDH	Sox5	Ctip2	Rorb	Fezf2
	18.0233	23.5896	22.1681	24.2638	24.8678			ctrl1	1	0.0171357	0.053011	0.0122591	0.00789794			Pum2 CKO1/ctrl	1	1.03548	1.34279	1.0305	1.23019			ctrl1/ctrl	1	1.00923	1.29097	0.928505	1.03991
	18.3796	23.8883	22.2971	24.4037	25.1086			ctrl2	1	0.0146046	0.0389595	0.0104349	0.00697205			Pum2 CKO2/ctrl	1	0.985595	1.10175	0.999326	1.24527			ctrl2/ctrl	1	0.860151	0.948777	0.79034	0.918001
	17.5822	24.1077		24.3675	24.9616			ctrl3	1	0.0170358	0.0552434	0.0123665	0.0079411			Pum2 CKO3/ctrl	1	1.43181	1.41024	1.22465				ctrl3/ctrl	1	1.00334	1.34534	0.936641	1.04559
Mean	17.995	23.8619	22.2326	24.345	24.9793			ctrl4	1	0.0172279	0.0437528	0.0128289	0.00749047			Pum2 CKO 4/ctrl	1	0.708748	0.589484	0.897229	0.537304			ctrl4/ctrl	1	1.01466	1.06551	0.971663	0.986262
∆ CT	0	5.86685	4.23756	6.35001	6.98431			ctrl5	1	0.0179055	0.0248952	0.0136947	0.00667489			Pum2 CKO 5/ctrl	1	0.761749	0.595307	0.994467	0.85626			ctrl5/ctrl	1	1.05456	0.606269	1.03724	0.878875
fold change	1	0.0171357	0.053011	0.0122591	0.00789794			ctrl6	1	0.0179648	0.0305153	0.017634	0.00859242			Average	1	0.984676	1.00792	1.02923	0.967256			ctrl6/ctrl	1	1.05806	0.743137	1.33561	1.13135
								pum2 cko1	1	0.0175815	0.0551389	0.0136057	0.00934309			stdev	0	0.286505	0.396278	0.120121	0.33843			Average	1	1	1	1	1
	ctrl2 GAPDH	ctrl2 Sox5	ctrl2 Ctip2	ctrl2 rorb	ctrl2 Fezf2			pum2 cko2	1	0.0167345	0.0452411	0.0131941	0.00945756			std error	0	0.128129	0.177221	0.0537199	0.169215			stdev	0	0.072411	0.293884	0.183251	0.0922056
	19.3268	24.745	23.2014	25.0609	25.7395			pum2 cko3	1	0.0243107	0.0579086	0.016169				T-test	#DIV/0!	0.901345	0.970446	0.767367	0.823187			std error	0	0.0295617	0.119978	0.0748121	0.0376428
	17.7001	24.5517	23.0875	25.1779	25.785			pum2 cko4	1	0.0120339	0.0242059	0.0118461	0.00408072
	18.6257	24.6482	23.4092	25.1611	25.6206			pum2 cko5	1	0.0129338	0.024445	0.0131299	0.00650313
Mean	18.5508	24.6483	23.2327	25.1333	25.715
∆ CT	0	6.09744	4.68188	6.58245	7.1642
fold change	1	0.0146046	0.0389595	0.0104349	0.00697205
	ctrl3 GAPDH	ctrl3 Sox5	ctrl3 Ctip2	ctrl3 rorb	ctrl3 Fezf2
	18.1002	23.9225	22.2613	24.4813	24.9828
	18.4357	24.0228	22.2898	24.4495	25.1566
	17.9732	24.1897	22.4922	24.5906	25.2991
Mean	18.1697	24.045	22.3478	24.5071	25.1461
∆ CT	0	5.87528	4.17805	6.33742	6.97645
fold change	1	0.0170358	0.0552434	0.0123665	0.0079411
	ctrl4 GAPDH	ctrl4 Sox5	ctrl4 Ctip2	ctrl4 rorb	ctrl4 Fezf2
		24.0599	22.6113	24.366	25.2196
	17.9424	23.9915	22.5878	24.4578	25.3134			Average ctrl	1	0.0169791	0.0410629	0.013203	0.00759481
	18.3761	24.0038	22.8221	24.5074	25.127			Average pum2 cko	1	0.0167189	0.0413879	0.013589	0.00734613
Mean	18.1593	24.0184	22.6738	24.4437	25.22			STDEV ctrl	0	0.00122947	0.0120677	0.00241947	0.000700284
∆ CT	0	5.85911	4.51448	6.28446	7.06073			STDEV pum2 cko	0	0.00486459	0.0162723	0.00158596	0.00257031					GAPDH	Sox5	Ctip2	Rorb	Fezf2
fold change	1	0.0172279	0.0437528	0.0128289	0.00749047			STD Error ctrl	0	0.000501929	0.00492663	0.000987743	0.00028589				Average ctrl	1	1	1	1	1
								STD Error pum2 cko	0	0.00217551	0.00727721	0.000709263	0.00128516				Average pum2 cko/ctrl	1	0.984676	1.00792	1.02923	0.967256
	ctrl5 GAPDH	ctrl5 Sox5	ctrl5 Ctip2	ctrl5 rorb	ctrl5 Fezf2			T-Test	#DIV/0!	0.901345	0.970446	0.767367	0.823187				std error ctrl	0	0.0295617	0.119978	0.0748121	0.0376428
	19.0182	24.856	24.1637	25.1698	26.3645												std error pum2 cko	0	0.128129	0.177221	0.0537199	0.169215
	19.0852	24.9759	24.5912	25.3436	26.3332
		24.7337	24.3842	25.2125	26.1387
Mean	19.0517	24.8552	24.3797	25.242	26.2788
∆ CT	0	5.80345	5.32799	6.19024	7.22704
fold change	1	0.0179055	0.0248952	0.0136947	0.00667489
	ctrl6 GAPDH	ctrl6 Sox5	ctrl6 Ctip2	ctrl6 rorb	ctrl6 Fezf2
	19.668	25.4954	24.8282	25.5747	Undetermined
	19.6969	25.6177		25.5802	Undetermined
	19.9314	25.5793	24.7714	25.6179	26.6282
Mean	19.7654	25.5641	24.7998	25.5909	26.6282
∆ CT	0	5.79868	5.03432	5.8255	6.86272
fold change	1	0.0179648	0.0305153	0.017634	0.00859242
P0	CTs
	pum2 cko1 GAPDH	pum2 cko1 Sox5	pum2 cko1 Ctip2	pum2 cko1 rorb	pum2 cko1 Fezf2
	18.0862	23.8901	22.2375	24.2129	24.7616
	18.3955	23.9975	22.232	24.3765	24.935
	17.9377	24.0211	22.4923	24.4289	24.9484
Mean	18.1398	23.9696	22.3206	24.3394	24.8817
∆ CT	0	5.8298	4.18078	6.19965	6.74188
fold change	1	0.0175815	0.0551389	0.0136057	0.00934309
	pum2 cko2 GAPDH	pum2 cko2 Sox5	pum2 cko2 Ctip2	pum2 cko2 rorb	pum2 cko2 Fezf2
	18.5623	24.2524	22.5549	24.4951	24.9816
	18.0266	24.1649	22.7299	24.6004	25.1531
	18.3143	24.1891	23.0171	24.5397	24.9415
Mean	18.3011	24.2021	22.7673	24.5451	25.0254
∆ CT	0	5.90103	4.46622	6.24396	6.72432
fold change	1	0.0167345	0.0452411	0.0131941	0.00945756
	pum2 cko3 GAPDH	pum2 cko3 Sox5	pum2 cko3 Ctip2	pum2 cko3 rorb	pum2 cko3 fezf2
	18.5728	24.2012	22.8303	24.6314	Undetermined
	18.7552	23.989		24.6552	Undetermined
	18.7158	23.9404	22.7524	24.6091	24.5896
Mean	18.6813	24.0435	22.7914	24.6319	24.5896
∆ CT	0	5.36226	4.11008	5.95062	5.90828
fold change	1	0.0243107	0.0579086	0.016169	0.0166506
	pum2 cko4 GAPDH	pum2 cko4 Sox5	pum2 cko4 Ctip2	pum2 cko4 rorb	pum2 cko4 Fezf2
	19.7123	26.3501	24.9777	26.1621	27.9374
	19.9406	26.1168	25.2519	26.2711	27.8939
		26.1427	25.3552	26.2445	27.4589
Mean	19.8265	26.2032	25.1949	26.2259	27.7634
∆ CT	0	6.37675	5.3685	6.39944	7.93696
fold change	1	0.0120339	0.0242059	0.0118461	0.00408072
	pum2 cko5 GAPDH	pum2 cko5 Sox5	pum2 cko5 Ctip2	pum2 cko5 rorb	pum2 cko5 Fezf2
	18.8645	25.3896	24.304	25.2704	Undetermined
	18.9162	25.2716		25.3226	Undetermined
	19.2375	25.1751	24.4166	25.178	26.2707
Mean	19.006	25.2787	24.3603	25.257	26.2707
∆ CT	0	6.27271	5.35432	6.251	7.26465
fold change	1	0.0129338	0.024445	0.0131299	0.00650313

## Sheet: hTDP43 A315T (b)
P0	CTs							P0 SA	Fold Change To GAPDH							Fold Change hTDP43 A315T to wt								Fold Change Wt to average WT
	W1 GAPDH	W1 Sox5	W1 Ctip2	W1 rorb	W1 Fezf2				GAPDH	Sox5	Ctip2	Rorb	Fezf2				GAPDH	Sox5	Ctip2	Rorb	Fezf2				GAPDH	Sox5	Ctip2	Rorb	Fezf2
	18.5896	23.6265	22.4123	24.1502	24.5054			W1	1	0.022737	0.0583774	0.0154316	0.0128211			T1/WT	1	1.18196	0.911132	1.25215	1.24587			wt1/WT	1	1.29219	1.20413	1.21036	1.47195
	18.3235	23.8978	22.4533	24.5408	24.6873			w2	1	0.0189842	0.0469164	0.0144139	0.00820212			T2/WT	1	0.800226	0.675949	0.821936	0.847629			wt2/WT	1	1.07892	0.967731	1.13054	0.941655
	18.1858	23.9511	22.5287	24.4619	24.7622			w3	1	0.0204904	0.0645195	0.014191	0.0115356			T3/WT	1	0.967401	0.902809	1.10164	1.02886			wt3/WT	1	1.16452	1.33082	1.11306	1.32436
Mean	18.3663	23.8251	22.4647	24.3843	24.6516			w4	1	0.017457	0.0486752	0.0130951	0.00762937			T4/WT	1	1.01375	1.0111	1.22123	0.890783			wt4/WT	1	0.992119	1.00401	1.0271	0.8759
∆ CT	0	5.45882	4.09845	6.01797	6.28533			w5	1	0.0128635	0.0355543	0.00952177	0.00596435			Average	1	0.990835	0.875247	1.09924	1.00329			WT5/WT	1	0.731063	0.733368	0.746832	0.684745
fold change	1	0.022737	0.0583774	0.0154316	0.0128211			w6	1	0.0130417	0.0368425	0.00984407	0.00610938			stdev	0	0.191357	0.133445	0.218317	0.199388			WT6/WT	1	0.74119	0.759939	0.772111	0.701396
								315t1	1	0.0207974	0.0441725	0.0159644	0.0108519			std error	0	0.0956783	0.0667225	0.109158	0.0996941			Average	1	1	1	1	1
	W2 GAPDH	W2 Sox5	W2 Ctip2	W2 rorb	W2 Fezf2			315t2	1	0.0140805	0.0327706	0.0104793	0.00738312			T-test	#DIV/0!	0.946144	0.376689	0.454461	0.985988			stdev	0	0.227175	0.23702	0.195364	0.327199
	19.0868	24.4568	22.9744	24.7737	25.6046			315t3	1	0.017022	0.043769	0.0140454	0.00896172											std error	0	0.0927439	0.0967631	0.0797571	0.133578
	18.3484	24.3983	23.0726	24.9197	25.716			315t4	1	0.0178376	0.0490189	0.0155702	0.007759
	18.6603	24.3975	23.2899	24.7513	25.5643
Mean	18.6985	24.4176	23.1123	24.8149	25.6283
∆ CT	0	5.71906	4.41376	6.1164	6.92979
fold change	1	0.0189842	0.0469164	0.0144139	0.00820212
	W3 GAPDH	W3 Sox5	W3 Ctip2	W3 rorb	W3 Fezf2
	18.6978	23.9251	22.1883	24.2469	24.6231
	17.9471	23.8043	22.1609	24.5397	24.735
	18.2617	24.0039	22.4198	24.5365	24.8618
Mean	18.3022	23.9111	22.2563	24.4411	24.74
∆ CT	0	5.60891	3.95412	6.13888	6.43777
fold change	1	0.0204904	0.0645195	0.014191	0.0115356
	w4 GAPDH	w4 Sox5	w4 Ctip2	w4 rorb	w4 Fezf2
	18.6097	24.1818	22.4057	24.3505	25.2652
	17.863	24.0109	22.6416	24.6197	25.3911			Average WT	1	0.0175956	0.0484809	0.0127496	0.00871032
	18.2764	24.0765	22.7837	24.5433	25.1953			Average315t	1	0.0174344	0.0424328	0.0140148	0.00873895
Mean	18.2497	24.0897	22.6104	24.5045	25.2839			STDEV WT	0	0.00399729	0.011491	0.00249081	0.00285001
∆ CT	0	5.84005	4.36067	6.25483	7.03422			STDEV315t	0	0.00276229	0.00686892	0.00249804	0.00156129					GAPDH	Sox5	Ctip2	Rorb	Fezf2
fold change	1	0.017457	0.0486752	0.0130951	0.00762937			STD Erro WT	0	0.00163189	0.00469116	0.00101687	0.00116351				Average wt	1	1	1	1	1
								STD Error315t	0	0.00138115	0.00343446	0.00124902	0.000780645				Average 315T/WT	1	0.990835	0.875247	1.09924	1.00329
	w5 GAPDH	w5 Sox5	w5 Ctip2	w5 rorb	w5 Fezf2			T-Test	#DIV/0!	0.946144	0.376689	0.454461	0.985988				std error wt	0	0.0927439	0.0967631	0.0797571	0.133578
		24.2863	22.7985	24.6488	25.4288												std error 315T	0	0.0956783	0.0667225	0.109158	0.0996941
	18.1005	24.303	22.828	24.9158	25.5279
	18.0585	24.4909	23.0535	24.8175	25.4501
Mean	18.0795	24.3601	22.8933	24.794	25.4689
∆ CT	0	6.28057	4.81383	6.71455	7.38942
fold change	1	0.0128635	0.0355543	0.00952177	0.00596435
	w6 GAPDH	w6 Sox5	w6 Ctip2	w6 rorb	w6 Fezf2
		24.3764	22.9411	24.5262	25.417
	17.9157	24.283	22.6103	24.8201	25.4387
	18.15	24.2214	22.8346	24.7519	25.3071
Mean	18.0329	24.2936	22.7953	24.6994	25.3876
∆ CT	0	6.26072	4.76248	6.66653	7.35476
fold change	1	0.0130417	0.0368425	0.00984407	0.00610938
P0	CTs
	315t1 GAPDH	315t1 Sox5	315t1 Ctip2	315t1 rorb	315T1 Fezf2
	18.3961	23.7591	22.7861	24.0638	24.7215
	18.2499	23.8713	22.6632	24.3454	24.7607
	18.2448	24.0228	22.9437	24.3886	24.9864
Mean	18.2969	23.8844	22.7976	24.2659	24.8228
∆ CT	0	5.58746	4.50071	5.969	6.5259
fold change	1	0.0207974	0.0441725	0.0159644	0.0108519
	315t2 GAPDH	315t2 Sox5	315t2 Ctip2	315t2 rorb	315T2 Fezf2
		24.3677	22.9876	24.5455	25.2619
	18.0206	24.2151	22.9683	24.7369	25.2642
	18.2132	24.2184	23.1893	24.7973	25.0694
Mean	18.1169	24.2671	23.0484	24.6932	25.1985
∆ CT	0	6.15016	4.93145	6.57631	7.08155
fold change	1	0.0140805	0.0327706	0.0104793	0.00738312
	315t3 GAPDH	315t3 Sox5	315t3 Ctip2	315t3 rorb	315t3 fezf2
	17.6653	23.2946	22.048	23.5473	24.2607
	17.9571	23.5355	21.8176	23.9075	24.8952
	17.2884	23.71	22.587	23.9173	24.1609
Mean	17.6369	23.5134	22.1509	23.7907	24.4389
∆ CT	0	5.87645	4.51395	6.15375	6.80201
fold change	1	0.017022	0.043769	0.0140454	0.00896172
	315T4 GAPDH	315T4 Sox5	315T4 Ctip2	315T4 rorb	315T4 Fezf2
	19.0129	24.0609	22.7804	24.3994	25.548
	17.9632	24.6255	22.8727	24.6442	25.6945
	18.641	24.3575	23.0155	24.5887	25.4043
Mean	18.539	24.348	22.8895	24.5441	25.5489
∆ CT	0	5.80893	4.35052	6.00507	7.00991
fold change	1	0.0178376	0.0490189	0.0155702	0.007759
