# Supplementary material for: Pum2 and TDP-43 refine area-specific cytoarchitecture post-mitotically and modulate translation of Sox5, Bcl11b, and Rorb mRNAs in developing mouse neocortex
Source: eLife. 2022 Mar 9;11:e55199. doi: 10.7554/eLife.55199 (PMC8906809; doi:10.7554/eLife.55199)
Supplement: Source data 15. — Quantification of results from single-molecule fluorescent in situ hybridization (smFISH) for Sox5, Bcl11b, Rorb, and Fezf2 mRNAs on coronal sections from the prospective somatosensory area (pS) of controls (Ctrl), Pum2 cKO, and TDP43A315T mice at P0. Distribution of cells across six equal-sized bins (Figure 8d). The number of RNA dots in the bins where they are mostly expressed is normalized to the total number of cell nuclei (DAPI) within that bin. Data are shown as means ± standard error of the mean (SEM), at least n = 3 for each genotype. *p≤0.05 by two-tailed t-test. Pum2 cKO: Pum2fl/fl; Emx1Cre. [file elife-55199-data15.xlsx]

## Sheet: Sox5
	WT1												Pum2 CKO1																		WT1														hTDP43 A315T	N1
	SA1					Sa2							sa1					sa2													SA1					Sa2									Sa1
	Bins	DAPI cells	Sox5 dots	Sox5/DAPI		Bins	DAPI cells	Sox5 dots	Sox5/DAPI				Bins	DAPI cells	Sox5 dots	Sox5/DAPI		Bins	DAPI cells	Sox5 dots	Sox5/DAPI										Bins	DAPI cells	Sox5 dots	Sox5/DAPI		Bins	DAPI cells	Sox5 dots	Sox5/DAPI						Bins	DAPI cells	Sox5 dots	Sox5/DAPI
	1	215	1405	6.53488		1	227	585	2.57709				1	78	590	7.5641		1	109	954	8.75229										1	170	818	4.81176		1	103	234	2.27184						1	290	1035	3.56897
	2	230	1773	7.7087		2	270	761	2.81852				2	95	675	7.10526		2	125	1244	9.952										2	197	1295	6.5736		2	178	574	3.22472						2	365	1661	4.55068
	3	214	2309	10.7897		3	226	667	2.95133				3	88	509	5.78409		3	141	1267	8.98582										3	214	1121	5.23832		3	189	518	2.74074						3	265	1694	6.39245
	4	227	1293	5.69604		4	237	442	1.86498				4	118	203	1.72034		4	169	1018	6.02367										4	229	711	3.1048		4	204	431	2.11275						4	331	792	2.39275
	1+2+3+4	886	6780	7.65237		1+2+3+4	960	2455	2.55729				1+2+3+4	379	1977	5.21636		1+2+3+4	544	4483	8.24081										1+2+3+4	810	3945	4.87037		1+2+3+4	674	1757	2.60682						1+2+3+4	1251	5182	4.14229
	WT2												Pum2 cko2																		WT2														hTDP43 A315T	N2
	SA1					Sa2							sa1																		SA1					Sa2
	Bins	DAPI cells	Sox5 dots	Sox5/DAPI		Bins	DAPI cells	Sox5 dots	Sox5/DAPI				Bins	DAPI cells	Sox5 dots	Sox5/DAPI		Bins	DAPI cells	Sox5 dots	Sox5/DAPI										Bins	DAPI cells	Sox5 dots	Sox5/DAPI		Bins	DAPI cells	Sox5 dots	Sox5/DAPI						Bins	DAPI cells	Sox5 dots	Sox5/DAPI
	1	182	1205	6.62088		1	182	771	4.23626				1	57	169	2.96491		1	88	524	5.95455										1	156	1014	6.5		1	180	175	0.972222						1	71	736	10.3662
	2	207	1655	7.99517		2	211	1062	5.03318				2	126	399	3.16667		2	125	919	7.352										2	151	1424	9.43046		2	180	505	2.80556						2	95	1034	10.8842
	3	231	1876	8.12121		3	231	1389	6.01299				3	96	362	3.77083		3	110	833	7.57273										3	167	1462	8.75449		3	164	467	2.84756						3	81	981	12.1111
	4	251	978	3.89641		4	216	1039	4.81019				4	102	301	2.95098		4	134	918	6.85075										4	176	1048	5.95455		4	165	285	1.72727						4	64	580	9.0625
	1+2+3+4	871	5714	6.56028		1+2+3+4	840	4261	5.07262				1+2+3+4	381	1231	3.23097		1+2+3+4	457	3194	6.98906										1+2+3+4	650	4948	7.61231		1+2+3+4	689	1432	2.07837						1+2+3+4	311	3331	10.7106
	WT3												Pum2 cko3																		WT3														hTDP43 A315T	N3
	SA1					Sa2							sa1																		SA1					Sa2
	Bins	DAPI cells	Sox5 dots	Sox5/DAPI		Bins	DAPI cells	Sox5 dots	Sox5/DAPI				Bins	DAPI cells	Sox5 dots	Sox5/DAPI		Bins	DAPI cells	Sox5 dots	Sox5/DAPI		Bins	DAPI cells	Sox5 dots	Sox5/DAPI					Bins	DAPI cells	Sox5 dots	Sox5/DAPI		Bins	DAPI cells	Sox5 dots	Sox5/DAPI						Bins	DAPI cells	Sox5 dots	Sox5/DAPI
	1	163	942	5.77914		1	144	669	4.64583				1	151	1090	7.21854		1	185	753	4.07027		1	121	632	5.22314					1	169	759	4.49112		1	82	104	1.26829						1	162	884	5.45679
	2	173	1117	6.45665		2	193	1209	6.26425				2	181	1452	8.0221		2	201	1044	5.19403		2	136	1190	8.75					2	220	1118	5.08182		2	121	228	1.8843						2	186	1008	5.41935
	3	173	1255	7.25434		3	197	1218	6.18274				3	203	1723	8.48768		3	176	934	5.30682		3	161	1216	7.5528					3	187	1075	5.74866		3	131	351	2.67939						3	173	846	4.89017
	4	204	1168	5.72549		4	186	1160	6.23656				4	205	1610	7.85366		4	171	632	3.69591		4	181	1072	5.92265					4	197	719	3.64975		4	182	509	2.7967						4	203	413	2.03448
	1+2+3+4	713	4482	6.28612		1+2+3+4	720	4256	5.91111				1+2+3+4	740	5875	7.93919		1+2+3+4	733	3363	4.58799		1+2+3+4	599	4110	6.86144					1+2+3+4	773	3671	4.74903		1+2+3+4	516	1192	2.31008						1+2+3+4	724	3151	4.35221
	WT4												pum2 CKO4																		WT4														hTDP43 A315T	N4
	SA1					Sa2							sa1					sa2					sa2								SA1					Sa2
	Bins	DAPI cells	Sox5 dots	Sox5/DAPI		Bins	DAPI cells	Sox5 dots	Sox5/DAPI				Bins	DAPI cells	Sox5 dots	Sox5/DAPI		Bins	DAPI cells	Sox5 dots	Sox5/DAPI		Bins	DAPI cells	Sox5 dots	Sox5/DAPI					Bins	DAPI cells	Sox5 dots	Sox5/DAPI		Bins	DAPI cells	Sox5 dots	Sox5/DAPI						Bins	DAPI cells	Sox5 dots	Sox5/DAPI
	1			#DIV/0!		1			#DIV/0!				1	141	679	4.8156		1	133	794	5.96992		1	152	994	6.53947					1	217	632	2.91244		1	162	627	3.87037						1	209	414	1.98086
	2			#DIV/0!		2			#DIV/0!				2	176	1011	5.74432		2	143	1190	8.32168		2	145	1163	8.02069					2	252	868	3.44444		2	165	854	5.17576						2	225	561	2.49333
	3			#DIV/0!		3			#DIV/0!				3	158	905	5.72785		3	136	1014	7.45588		3	178	1230	6.91011					3	248	727	2.93145		3	162	583	3.59877						3	206	504	2.4466
	4			#DIV/0!		4			#DIV/0!				4	218	356	1.63303		4	192	520	2.70833		4	155	798	5.14839					4	224	530	2.36607		4	189	532	2.81481						4	222	587	2.64414
	1+2+3+4	0	0	#DIV/0!		1+2+3+4	0	0	#DIV/0!				1+2+3+4	693	2951	4.2583		1+2+3+4	604	3518	5.8245		1+2+3+4	630	4185	6.64286					1+2+3+4	941	2757	2.92986		1+2+3+4	678	2596	3.82891						1+2+3+4	862	2066	2.39675
			Sox5 mRNA dots/DAPI cells												Sox5 mRNA dots/DAPI cells																		Sox5 mRNA dots/DAPI cells														Sox5 mRNA dots/DAPI cells
	Bins	WT1	WT2	wt3	Average wt	error							Bins	pum2 cko1	pum2 cko2	pum2 cko3	Pum2 cko4	Average Pum2 CKO	error	T-test											Bins	WT1	WT2	wt3	wt4	Average wt	error								Bins	hTDP43 A315T1	hTDP43 A315T2	hTDP43 A315T3	hTDP-43 315T N4
	1	4.55599	5.42857	5.21249	5.06568	0.26237							1	8.1582	4.45973	5.50398	5.775	5.97423	0.781252	0.382854											1	3.5418	3.73611	2.87971	3.39141	3.38726	0.183305								1	3.62144	7.74889	4.07076	3.74164
	2	5.26361	6.51417	6.36045	6.04608	0.393743							2	8.52863	5.25933	7.32204	7.36223	7.11806	0.679816	0.272285											2	4.89916	6.11801	3.48306	4.3101	4.70258	0.554028								2	3.12087	10.3994	4.37207	4.08863
	3	6.87052	7.0671	6.71854	6.88539	0.100895							3	7.38495	5.67178	7.11577	6.69795	6.71761	0.376167	0.726294											3	3.98953	5.80103	4.21403	3.26511	4.31742	0.534373								3	3.7563	10.5367	4.40103	4.60201
	4	3.78051	4.3533	5.98102	4.70494	0.659118							4	3.872	4.90086	5.82407	3.16325	4.44005	0.58315	0.776322											4	2.60877	3.84091	3.22322	2.59044	3.06584	0.297267								4	1.7003	7.27397	2.09892	4.13909
	1+2+3+4	5.10483	5.81645	6.09861	5.6733	0.295674							1+2+3+4	6.72858	5.11002	6.46287	5.57522	5.96917	0.377911	0.587697											1+2+3+4	3.7386	4.84534	3.52955	3.37939	3.87322	0.332305								1+2+3+4	2.93168	9.0583	3.70497	4.1259
[truncated: 8 more columns]

## Sheet: Rorb
WT1												Pum2 CKO 1															WT1											hTDP43 A315T N1
SA1					SA2							SA1					SA2										SA1					SA2						SA1					SA2
Bins	DAPI cells	Rorb dots	rorb dots/DAPI		Bins	DAPI cells	Rorb dots	rorb dots/DAPI				Bins	DAPI cells	Rorb dots	rorb dots/DAPI		Bins	DAPI cells	Rorb dots	rorb dots/DAPI							Bins	DAPI cells	Rorb dots	rorb dots/DAPI		Bins	DAPI cells	Rorb dots	rorb dots/DAPI			Bins	DAPI cells	Rorb dots	rorb dots/DAPI		Bins	DAPI cells	Rorb dots	rorb dots/DAPI
3	214	381	1.78037		3	226	312	1.38053				3	88	509	5.78409		3	141	671	4.75887							3	214	212	0.990654		3	189	220	1.16402			3	265	1001	3.77736		3	283	1154	4.07774
4	227	1631	7.18502		4	237	1680	7.08861				4	118	1044	8.84746		4	169	1640	9.70414							4	229	1044	4.55895		4	204	969	4.75			4	331	2670	8.06647		4	255	2272	8.9098
5	283	404	1.42756		5	321	1148	3.57632				5	144	289	2.00694		5	190	1298	6.83158							5	242	833	3.44215		5	302	1084	3.5894			5	349	2027	5.80802		5	299	1614	5.39799
3+4+5	724	2416	3.33702		3+4+5	784	3140	4.0051				3+4+5	350	1842	5.26286		3+4+5	500	3609	7.218							3+4+5	685	2089	3.04964		3+4+5	695	2273	3.2705			3+4+5	945	5698	6.02963		3+4+5	837	5040	6.02151
WT2												Pum2 CKO2															WT2											hTDP43 A315T N2
SA1					SA2							SA1															SA1					SA2						SA1					SA2
Bins	DAPI cells	Rorb dots	rorb dots/DAPI		Bins	DAPI cells	Rorb dots	rorb dots/DAPI				Bins	DAPI cells	Rorb dots	rorb dots/DAPI		Bins	DAPI cells	Rorb dots	rorb dots/DAPI							Bins	DAPI cells	Rorb dots	rorb dots/DAPI		Bins	DAPI cells	Rorb dots	rorb dots/DAPI			Bins	DAPI cells	Rorb dots	rorb dots/DAPI		Bins	DAPI cells	Rorb dots	rorb dots/DAPI
3	231	279	1.20779		3	231	204	0.883117				3	96	383	3.98958		3	110	279	2.53636							3	167	99	0.592814		3	164	32	0.195122			3	106	90	0.849057		3	81	45	0.555556
4	251	1255	5		4	216	799	3.69907				4	102	459	4.5		4	134	1200	8.95522							4	176	712	4.04545		4	165	224	1.35758			4	103	256	2.48544		4	64	249	3.89062
5	286	899	3.14336		5	292	724	2.47945				5	120	177	1.475		5	164	1340	8.17073							5	183	423	2.31148		5	200	463	2.315			5	143	1465	10.2448		5	119	1188	9.98319
3+4+5	768	2433	3.16797		3+4+5	739	1727	2.33694				3+4+5	318	1019	3.2044		3+4+5	408	2819	6.90931							3+4+5	526	1234	2.34601		3+4+5	529	719	1.35917			3+4+5	352	1811	5.14489		3+4+5	264	1482	5.61364
WT3												Pum2 CKO3															WT3											hTDP43 A315T N3
SA1					SA2							SA1															SA1					SA2						SA1					SA2
Bins	DAPI cells	Rorb dots	rorb dots/DAPI		Bins	DAPI cells	Rorb dots	rorb dots/DAPI				Bins	DAPI cells	Rorb dots	rorb dots/DAPI		Bins	DAPI cells	Rorb dots	rorb dots/DAPI		Bins	DAPI cells	Rorb dots	rorb dots/DAPI		Bins	DAPI cells	Rorb dots	rorb dots/DAPI		Bins	DAPI cells	Rorb dots	rorb dots/DAPI			Bins	DAPI cells	Rorb dots	rorb dots/DAPI		Bins	DAPI cells	Rorb dots	rorb dots/DAPI
3	173	408	2.35838		3	197	326	1.65482				3	203	880	4.33498		3	176	711	4.03977		3	161	292	1.81366		3	187	635	3.39572		3	131	15	0.114504			3	173	315	1.82081		3	227	1148	5.05727
4	204	1175	5.7598		4	186	964	5.1828				4	205	1402	6.83902		4	171	1314	7.68421		4	181	877	4.8453		4	197	1634	8.29442		4	182	129	0.708791			4	203	1435	7.06897		4	202	2474	12.2475
5	223	1228	5.50673		5	194	722	3.72165				5	245	1086	4.43265		5	174	768	4.41379		5	230	819	3.56087		5	257	1152	4.48249		5	244	174	0.713115			5	270	621	2.3		5	337	2202	6.53412
3+4+5	600	2811	4.685		3+4+5	577	2012	3.487				3+4+5	653	3368	5.15773		3+4+5	521	2793	5.36084		3+4+5	572	1988	3.47552		3+4+5	641	3421	5.33697		3+4+5	557	318	0.570916			3+4+5	646	2371	3.67028		3+4+5	766	5824	7.60313
WT4												Pum2 CKO4															WT4											hTDP43 A315T N4
SA1					SA2							SA1															SA1					SA2						SA1					SA2
Bins	DAPI cells	Rorb dots	rorb dots/DAPI		Bins	DAPI cells	Rorb dots	rorb dots/DAPI				Bins	DAPI cells	Rorb dots	rorb dots/DAPI		Bins	DAPI cells	Rorb dots	rorb dots/DAPI		Bins	DAPI cells	Rorb dots	rorb dots/DAPI		Bins	DAPI cells	Rorb dots	rorb dots/DAPI		Bins	DAPI cells	Rorb dots	rorb dots/DAPI			Bins	DAPI cells	Rorb dots	rorb dots/DAPI		Bins	DAPI cells	Rorb dots	rorb dots/DAPI		Bins	DAPI cells
3			#DIV/0!		3			#DIV/0!				3	158	1090	6.89873		3	136	888	6.52941		3	178	887	4.98315		3	248	199	0.802419		3	162	152	0.938272			3	206	217	1.0534		3	211	211	1		3	249
4			#DIV/0!		4			#DIV/0!				4	218	1116	5.11927		4	192	1176	6.125		4	155	1107	7.14194		4	224	1248	5.57143		4	189	357	1.88889			4	222	807	3.63514		4	221	413	1.86878		4	249
5			#DIV/0!		5			#DIV/0!				5	180	365	2.02778		5	223	339	1.52018		5	169	319	1.88757		5	287	944	3.2892		5	227	119	0.524229			5	260	421	1.61923		5	263	321	1.22053		5	262
3+4+5	0	0	#DIV/0!		3+4+5	0	0	#DIV/0!				3+4+5	556	2571	4.6241		3+4+5	551	2403	4.36116		3+4+5	502	2313	4.60757		3+4+5	759	2391	3.1502		3+4+5	578	628	1.08651			3+4+5	688	1445	2.10029		3+4+5	695	945	1.35971		3+4+5	760
		Average Rorb dots/DAPI cells												Average Rorb dots/DAPI cells															Average Rorb dots/DAPI cells											Average Rorb dots/DAPI cells
Bins	wt1	wt2	wt3	Average WT	Error WT							Bins	pum2 cko1	pum2 cko2	pum2 cko3	pum2 cko4	Average pum2 cko	Error pum2 cko	T-test	Stars							Bins	wt1	wt2	wt3	WT4	Average WT	Error WT					Bins	hTDP43 A315T1	hTDP43 A315T2	hTDP43 A315T3	Average hTDP43 A315T	Error hTDP43 A315T	T-test	Stars
3	1.58045	1.04545	2.0066	1.54417	0.278052							3	5.27148	3.26297	3.39614	6.1371	4.51692	0.708453	0.0188951	*							3	1.07734	0.393968	1.75511	0.870345	1.02419	0.282536					3	3.92755	0.702306	3.43904	2.68963	1.00362	0.124709
4	7.13681	4.34954	5.4713	5.65255	0.809705							4	9.2758	6.72761	6.45618	6.12873	7.14708	0.720056	0.228119								4	4.65448	2.70152	4.5016	3.73016	3.89694	0.446872					4	8.48813	3.18803	9.65825	7.11147	1.99059	0.125205
5	2.50194	2.8114	4.61419	3.30918	0.658592							5	4.41926	4.82287	4.13577	1.81184	3.79744	0.676709	0.636767								5	3.51578	2.31324	2.5978	1.90671	2.58338	0.341617					5	5.60301	10.114	4.41706	6.71135	1.73542	0.0408459	*
3+4+5	3.67106	2.75246	4.086	3.50317	0.394007							3+4+5	6.24043	5.05686	4.6647	4.53094	5.12323	0.388758	0.0352926	*							3+4+5	3.16007	1.85259	2.95394	2.11835	2.52124	0.316853					3+4+5	6.02557	5.37926	5.63671	5.68051	0.187854	0.000564484	***
[truncated: 2 more columns]

## Sheet: Fezf2 Ctip2
	wt1															Pum2 CKO1																							wt1
	sa1							sa2								sa1							sa2																sa1							sa2
	Bins	DAPI cells	Ctip2 dots	Fezf2 dots	Ctip2 dots/DAPI cells	Fezf2 dots/DAPI cells		Bins	DAPI cells	Ctip2 dots	Fezf2 dots	Ctip2 dots/DAPI cells	Fezf2 dots/DAPI cells			Bins	DAPI cells	Ctip2 dots	Fezf2 dots	Ctip2 dots/DAPI cells	Fezf2 dots/DAPI cells		Bins	DAPI cells	Ctip2 dots	Fezf2 dots	Ctip2 dots/DAPI cells	Fezf2 dots/DAPI cells											Bins	DAPI cells	Ctip2 dots	Fezf2 dots	Ctip2 dots/DAPI cells	Fezf2 dots/DAPI cells		Bins	DAPI cells	Ctip2 dots	Fezf2 dots
	3	139	399	209	2.8705	1.5036		3	112	374	335	3.33929	2.99107			3	164	914	901	5.57317	5.4939		3	166	1014	727	6.10843	4.37952											3	147	543	309	3.69388	2.10204		3	149	455	363
	4	141	461	221	3.2695	1.56738		4	135	315	278	2.33333	2.05926			4	187	836	664	4.47059	3.5508		4	180	738	621	4.1	3.45											4	183	425	262	2.3224	1.43169		4	175	847	585
	3+4	280	860	430	3.07143	1.53571		3+4	247	689	613	2.78947	2.48178			3+4	351	1750	1565	4.98575	4.45869		3+4	346	1752	1348	5.06358	3.89595											3+4	330	968	571	2.93333	1.7303		3+4	324	1302	948
	wt2															Pum2 CKO2																							wt2
	sa1							sa2								sa1							sa2																sa1							sa2
	Bins	DAPI cells	Ctip2 dots	Fezf2 dots	Ctip2 dots/DAPI cells	Fezf2 dots/DAPI cells		Bins	DAPI cells	Ctip2 dots	Fezf2 dots	Ctip2 dots/DAPI cells	Fezf2 dots/DAPI cells			Bins	DAPI cells	Ctip2 dots	Fezf2 dots	Ctip2 dots/DAPI cells	Fezf2 dots/DAPI cells		Bins	DAPI cells	Ctip2 dots	Fezf2 dots	Ctip2 dots/DAPI cells	Fezf2 dots/DAPI cells											Bins	DAPI cells	Ctip2 dots	Fezf2 dots	Ctip2 dots/DAPI cells	Fezf2 dots/DAPI cells		Bins	DAPI cells	Ctip2 dots	Fezf2 dots
	3	142	275	160	1.93662	1.12676		3	101	289	309	2.86139	3.05941			3	121	441	698	3.64463	5.7686		3	118	584	672	4.94915	5.69492											3	151	770	406	5.09934	2.68874		3	208	640	351
	4	127	323	336	2.54331	2.64567		4	125	486	412	3.888	3.296			4	129	838	658	6.49612	5.10078		4	175	241	220	1.37714	1.25714											4	198	448	137	2.26263	0.691919		4	269	501	215
	3+4	269	598	496	2.22305	1.84387		3+4	226	775	721	3.4292	3.19027			3+4	250	1279	1356	5.116	5.424		3+4	293	825	892	2.8157	3.04437											3+4	349	1218	543	3.48997	1.55587		3+4	477	1141	566
	wt3															Pum2 CKO3																							wt3
	sa1							sa2								sa1							sa2																sa1							sa2
	Bins	DAPI cells	Ctip2 dots	Fezf2 dots	Ctip2 dots/DAPI cells	Fezf2 dots/DAPI cells		Bins	DAPI cells	Ctip2 dots	Fezf2 dots	Ctip2 dots/DAPI cells	Fezf2 dots/DAPI cells			Bins	DAPI cells	Ctip2 dots	Fezf2 dots	Ctip2 dots/DAPI cells	Fezf2 dots/DAPI cells		Bins	DAPI cells	Ctip2 dots	Fezf2 dots	Ctip2 dots/DAPI cells	Fezf2 dots/DAPI cells											Bins	DAPI cells	Ctip2 dots	Fezf2 dots	Ctip2 dots/DAPI cells	Fezf2 dots/DAPI cells		Bins	DAPI cells	Ctip2 dots	Fezf2 dots
	3	118	451	427	3.82203	3.61864		3	147	387	644	2.63265	4.38095			3	129	361	365	2.79845	2.82946		3	124	519	347	4.18548	2.79839											3	231	933	437	4.03896	1.89177		3	262	544	310
	4	139	1043	1195	7.5036	8.59712		4	161	992	980	6.16149	6.08696			4	142	415	456	2.92254	3.21127		4	135	871	479	6.45185	3.54815											4	279	377	182	1.35125	0.65233		4	255	461	225
	3+4	257	1494	1622	5.81323	6.31128		3+4	308	1379	1624	4.47727	5.27273			3+4	271	776	821	2.86347	3.02952		3+4	259	1390	826	5.3668	3.18919											3+4	510	1310	619	2.56863	1.21373		3+4	517	1005	535
																Pum2 CKO4
	wt4
	Bins	DAPI cells	Ctip2 dots	Fezf2 dots	Ctip2 dots/DAPI cells	Fezf2 dots/DAPI cells		Bins	DAPI cells	Ctip2 dots	Fezf2 dots	Ctip2 dots/DAPI cells	Fezf2 dots/DAPI cells			Bins	DAPI cells	Ctip2 dots	Fezf2 dots	Ctip2 dots/DAPI cells	Fezf2 dots/DAPI cells		Bins	DAPI cells	Ctip2 dots	Fezf2 dots	Ctip2 dots/DAPI cells	Fezf2 dots/DAPI cells		Bins	DAPI cells	Ctip2 dots	Fezf2 dots	Ctip2 dots/DAPI cells	Fezf2 dots/DAPI cells
	3	184	765	417	4.15761	2.2663		3	203	834	339	4.10837	1.66995			3	217	950	451	4.37788	2.07834		3	211	704	435	3.33649	2.06161		3	247	891	385	3.60729	1.5587
	4	212	394	212	1.85849	1		4	240	412	161	1.71667	0.670833			4	232	417	186	1.79741	0.801724		4	205	438	300	2.13659	1.46341		4	243	1102	596	4.53498	2.45267
	3+4	396	1159	629	2.92677	1.58838		3+4	443	1246	500	2.81264	1.12867			3+4	449	1367	637	3.04454	1.41871		3+4	416	1142	735	2.74519	1.76683		3+4	490	1993	981	4.06735	2.00204
																																								Average Ctip2 dots/DAPI cells
		Average Ctip2 dots/DAPI cells															Average Ctip2 dots/DAPI cells																						Bins	wt1	wt2	wt3	Average wt	Error wt
	Bins	wt1	WT2	WT3	wt4	Average WT	Error WT									Bins	Pum2 cko1	Pum2 cko2	Pum2 cko3	Pum2 cko4	Average Pum2 cko	Error Pum2 cko	T-test																3	2.71235	3.671	3.27815	3.2205	0.278236
	3	3.10489	2.399	3.22734	4.13299	3.21606	0.356									3	5.8408	4.29689	3.49197	3.77389	4.35089	0.523883	0.123369																4	3.78014	2.21411	1.91655	2.63693	0.578021
	4	2.80142	3.21565	6.83254	1.78758	3.6593	1.09945									4	4.28529	3.93663	4.68719	2.82299	3.93303	0.400525	0.822817																3+4	3.24642	2.85206	2.54849	2.88232	0.202043
	3+4	2.93045	2.82613	5.14525	2.8697	3.44288	0.567859			Ctip2 dots/DAPI cells in single bins						3+4	5.02467	3.96585	4.11513	3.28569	4.09784	0.357807	0.366842
																																								Average Fezf2 dots/DAPI cells
																																							Bins	wt1	wt2	wt3	Average wt	Error wt
																																							3	1.9496	2.05228	1.49733	1.83307	0.170467
																																							4	2.63515	1.0143	0.939382	1.52961	0.553192
																																							3+4	2.29311	1.46887	1.19873	1.65357	0.329141
		Average Fezf2 dots/DAPI cells															Average Fezf2 dots/DAPI cells
	Bins	wt1	WT2	WT3	wt4	Average WT	Error WT									Bins	Pum2 cko1	Pum2 cko2	Pum2 cko3	Pum2cko4	Average Pum2 cko	Error Pum2 cko	T-test
	3	2.24733	2.09308	3.9998	1.96813	2.57709	0.477662									3	4.93671	5.73176	2.81392	1.89955	3.84548	0.894407	0.257527
	4	1.81332	2.97083	7.34204	0.835417	3.2404	1.43517									4	3.5004	3.17896	3.37971	1.5726	2.90792	0.450014	0.83238
	3+4	2.00875	2.51707	5.79201	1.35853	2.91909	0.986549									3+4	4.17732	4.23418	3.10935	1.72919	3.31251	0.587761	0.743584
								Fezf2 dots/DAPI cells in single bins
[truncated: 20 more columns]
