# Supplementary material for: Pum2 and TDP-43 refine area-specific cytoarchitecture post-mitotically and modulate translation of Sox5, Bcl11b, and Rorb mRNAs in developing mouse neocortex
Source: eLife. 2022 Mar 9;11:e55199. doi: 10.7554/eLife.55199 (PMC8906809; doi:10.7554/eLife.55199)
Supplement: Source data 16. — Quantification of results from n = 3 experiments of polysome profiling on TDP43A315T cortices at E14.5 (Figure 8c). Histograms depict the distribution of the Sox5, Bcl11b, Rorb, and Fezf2 mRNAs across the gradient fractions for TDP43A315T relative to corresponding controls (Ctrl). Samples in heavier gradient fractions were virtually pooled at analysis to simplify visualization in the case of the Bcl11b B1 primer. Levels of specific mRNAs in each fraction were analyzed by qRT-PCR with normalization to an RLuc mRNA spike-in control, which was added in an equal amount to the fractions prior to RNA preparation. Data are shown as means ± standard error of the mean (SEM), n = 3 for each genotype. *p≤0.05, **p≤0.01, one-tailed t-test. [file elife-55199-data16.xlsx]

## Sheet: Sox5 S4
Sox5 S4	CTs																									Normalized % Sox5 S4
	WT1 F-1	WT1 F-2	WT1 F-3	WT1 F-4	WT1 F-5	WT1 F-6		WT1	1	2	3	4	5	6	Total		% in 1/6	% in 2/6	% in 3/6	% in 4/6	% in 5/6	% in 6/6				F1	F2	F3	F4	F5	F6
		26.7542	28.0424						Rluc																wt1	23.808	18.3076	11.0747	9.81239	23.6792	13.3181
	25.8835	26.7066	28.2015	28.6395	25.3976	27.5987			1	0.733811	0.492151	0.369271	1.49423	0.566128	4.65559		21.4796	15.7619	10.5712	7.93177	32.0954	12.1602			wt2	21.3946	14.0706	8.69736	7.57119	36.6883	11.578
	25.9262		27.8517	28.6023	25.269	27.5287			Sox5 S4														100		wt3	13.7809	13.4958	16.5181	10.1223	36.1981	9.88482
Mean	25.9049	26.7304	28.0319	28.6209	25.3333	27.5637		raw	1	0.564277	0.228931	0.152193	1.48614	0.316691	3.74823		26.6792	15.0545	6.10772	4.06041	39.6491	8.44906
∆ CT	0	0.825524	2.12701	2.71602	-0.571569	1.65885		norm.	1	0.768968	0.465165	0.412146	0.994587	0.559397	4.20026		23.808	18.3076	11.0747	9.81239	23.6792	13.3181	100		315T1	26.3136	8.93917	9.50366	14.4229	27.0903	13.7304
fold change	1	0.564277	0.228931	0.152193	1.48614	0.316691																	100		315T2	15.13	8.59307	16.0144	10.1033	25.4232	24.736
								WT2	1	2	3	4	5	6	Total		% in 1/6	% in 2/6	% in 3/6	% in 4/6	% in 5/6	% in 6/6			315T3	16.5406	4.68008	14.9681	4.42238	41.5597	17.8291
	WT2 F-1	WT2 F-2	WT2 F-3	WT2 F-4	WT2 F-5	WT1 F-6			Rluc
	24.926	26.7196	27.3781	28.5035	28.6873	28.3426			1	0.431836	0.443502	0.241212	0.0400699	0.204376	2.361		42.355	18.2904	18.7845	10.2165	1.69716	8.65634			Average wt Sox5 S4/Rluc	19.6612	15.2913	12.0967	9.16863	32.1885	11.5936
			27.6667			27.8594			Sox5 S4														100		Average 315T Sox5 S4/Rluc	19.3281	7.40411	13.4954	9.64952	31.3577	18.7652
	24.9283	26.7668	27.1514	28.4514	28.8935	28.1091		raw	1	0.284006	0.180293	0.0853609	0.0687135	0.110601	1.72897		57.8377	16.4263	10.4277	4.93708	3.97423	6.3969			stdevwt	5.23351	2.62794	4.00929	1.39207	7.37339	1.71672
Mean	24.9272	26.7432	27.3988	28.4775	28.7904	28.1037		norm.	1	0.657672	0.406522	0.353884	1.71484	0.541165	4.67408		21.3946	14.0706	8.69736	7.57119	36.6883	11.578	100		Stdev 315T	6.09067	2.36541	3.49631	5.01567	8.87442	5.5622
∆ CT	0	1.816	2.47158	3.55028	3.86326	3.17657																	100		std error wt	3.02157	1.51724	2.31476	0.803713	4.25703	0.991147
fold change	1	0.284006	0.180293	0.0853609	0.0687135	0.110601		WT3	1	2	3	4	5	6	Total		% in 1/6	% in 2/6	% in 3/6	% in 4/6	% in 5/6	% in 6/6			std erro 315T	3.51645	1.36567	2.01859	2.8958	5.12365	3.21134
									Rluc
	WT3 F-1	WT3 F-2	WT3 F-3	WT3 F-4	WT3 F-5	WT1 F-6			1	0.193339	0.445126	0.0707538	0.259875	0.124056	2.09315		47.7749	9.23676	21.2659	3.38025	12.4155	5.92675			T-Test	0.946174	0.0180894	0.67244	0.880623	0.906766	0.0997736
	26.2492	28.6627		30.5889	26.9132				Sox5 S4														100
	26.4166	28.807	27.2933		26.8563	29.7391		raw	1	0.18934	0.533539	0.05197	0.682611	0.0889833	2.54644		39.2705	7.43545	20.9523	2.04088	26.8065	3.49442			1 Tail T-test	0.473087	0.00904471	0.33622	0.440311	0.453383	0.0498868
	26.3358		27.1871	30.6112		29.9093		norm.	1	0.979313	1.19862	0.734519	2.62669	0.717285	7.25644		13.7809	13.4958	16.5181	10.1223	36.1981	9.88482	100				**				*
Mean	26.3339	28.7348	27.2402	30.6001	26.8848	29.8242																	100
∆ CT	0	2.40095	0.906334	4.26618	0.550864	3.49032
fold change	1	0.18934	0.533539	0.05197	0.682611	0.0889833		315T1	1	2	3	4	5	6	Total		% in 1/6	% in 2/6	% in 3/6	% in 4/6	% in 5/6	% in 6/6
									Rluc
									1	0.439298	0.202555	0.129529	0.347066	0.177392	2.29584		43.557	19.1345	8.8227	5.64191	15.1172	7.72667	100
									Sox5 S4
								raw	1	0.149237	0.0731566	0.0709969	0.357309	0.0925625	1.74326		57.3637	8.56077	4.19653	4.07264	20.4966	5.30973	100
	CTs							norm.	1	0.339716	0.361169	0.548115	1.02951	0.521797	3.80031		26.3136	8.93917	9.50366	14.4229	27.0903	13.7304	100
	315T1 F-1	315T1 F-2	315T1 F-3	315T1 F-4	315T1 F-5	315T1 F-6
	27.1566		30.9727	31.0671	28.6143	30.4081		315T2	1	2	3	4	5	6	Total		% in 1/6	% in 2/6	% in 3/6	% in 4/6	% in 5/6	% in 6/6
	27.0683	29.8898	30.7979						Rluc
		29.8237		30.79	28.5802	30.6836			1	0.242268	0.354773	0.253151	0.579199	0.230539	2.65993		37.595	9.10807	13.3377	9.5172	21.775	8.6671	100
Mean	27.1124	29.8568	30.8853	30.9285	28.5972	30.5459			Sox5 S4
∆ CT	0	2.74433	3.77287	3.8161	1.48476	3.43343		raw	1	0.137596	0.375512	0.169046	0.973242	0.376908	3.0323		32.9782	4.53768	12.3837	5.57483	32.0958	12.4298	100
fold change	1	0.149237	0.0731566	0.0709969	0.357309	0.0925625		norm.	1	0.56795	1.05846	0.667767	1.68032	1.6349	6.6094		15.13	8.59307	16.0144	10.1033	25.4232	24.736	100
	315T2 CxB-1	315T2 CxB-2	315T2 CxB-3	315T2 F-4	315T2 F-5	315T2 F-6		315T3	1	2	3	4	5	6	Total		% in 1/6	% in 2/6	% in 3/6	% in 4/6	% in 5/6	% in 6/6
		28.5404	27.2382	28.331	25.8714	27.1041			Rluc
	25.797								1	0.685952	0.687124	0.179912	0.961294	0.544304	4.05858		24.6391	16.9013	16.9301	4.43288	23.6854	13.4112	100
	25.8056	28.7852	27.1905	28.4007	25.8095	27.3139			Sox5 S4
Mean	25.8013	28.6628	27.2144	28.3658	25.8404	27.209		raw	1	0.194087	0.6218	0.0481023	2.41534	0.586705	4.86603		20.5506	3.98861	12.7784	0.988533	49.6367	12.0572	100
∆ CT	0	2.86149	1.41307	2.56451	0.0391293	1.40771		norm.	1	0.282945	0.904931	0.267366	2.51259	1.0779	6.04573		16.5406	4.68008	14.9681	4.42238	41.5597	17.8291	100
fold change	1	0.137596	0.375512	0.169046	0.973242	0.376908
	315T3 F-1	315T3 F-2	315T3 F-3	315T3 F-4	315T3 F-5	315T3 F-6
	27.8995		28.5922	32.3954	26.7101
	27.8759	30.3711	28.5542		26.5209	28.6473
		30.1348		32.1355		28.6667
Mean	27.8877	30.2529	28.5732	32.2655	26.6155	28.657
∆ CT	0	2.36523	0.685478	4.37775	-1.27223	0.769292
fold change	1	0.194087	0.6218	0.0481023	2.41534	0.586705
Rluc	CTs
	WT1 F-1	WT1 F-2	WT1 F-3	WT1 F-4	WT1 F-5	WT1 F-6
	20.4178	20.8968	21.4846	21.8963	19.8027
	20.466	20.8801		21.8812	19.8498	21.2992
			21.445	21.86	19.935	21.2263
Mean	20.4419	20.8885	21.4648	21.8792	19.8625	21.2627
∆ CT	0	0.44652	1.02283	1.43725	-0.5794	0.820799
fold change	1	0.733811	0.492151	0.369271	1.49423	0.566128
	WT2 F-1	WT2 F-2	WT2 F-3	WT2 F-4	WT2 F-5	WT1 F-6
	19.4546			21.6152	24.1864	21.8793
	19.5906	20.7901	20.7499	21.6195	24.2421	21.8509
	19.6736	20.7786	20.7419	21.6389		21.8607
Mean	19.5729	20.7844	20.7459	21.6246	24.2143	21.8636
∆ CT	0	1.21144	1.17299	2.05163	4.64134	2.2907
fold change	1	0.431836	0.443502	0.241212	0.0400699	0.204376
	WT3 F-1	WT3 F-2	WT3 F-3	WT3 F-4	WT3 F-5	WT1 F-6
	18.1628	20.4745	19.2643	21.8672	19.956	21.0597
	17.9941	20.4414	19.2455	21.9054	20.1065	21.1365
	18.1045			21.952
Mean	18.0872	20.458	19.2549	21.9082	20.0313	21.0981
∆ CT	0	2.37079	1.16771	3.82105	1.94411	3.01094
fold change	1	0.193339	0.445126	0.0707538	0.259875	0.124056
	CTs
	315T1 F-1	315T1 F-2	315T1 F-3	315T1 F-4	315T1 F-5	315T1 F-6
	19.4681	20.6694	21.8004	22.387	20.973
	19.4502	20.6425	21.7251	22.4286	20.9988	21.9548
		20.6258				21.9535
Mean	19.4592	20.6459	21.7628	22.4078	20.9859	21.9542
∆ CT	0	1.18673	2.30361	2.94865	1.52672	2.49499
fold change	1	0.439298	0.202555	0.129529	0.347066	0.177392
	315T2 CxB-1	315T2 CxB-2	315T2 CxB-3	315T2 F-4	315T2 F-5	315T2 F-6
	19.7962				20.5784
		21.8676	21.3451	21.8019	20.6335	21.9358
	19.8399	21.8591	21.2811	21.7981		21.9342
Mean	19.8181	21.8634	21.3131	21.8	20.6059	21.935
∆ CT	0	2.04532	1.49503	1.98193	0.787868	2.11692
fold change	1	0.242268	0.354773	0.253151	0.579199	0.230539
	315T3 F-1	315T3 F-2	315T3 F-3	315T3 F-4	315T3 F-5	315T3 F-6
		20.5193	20.532	22.4734	20.0562	20.8619
	19.9802	20.5146	20.497	22.423	20.0349
	19.9661			22.4469	19.9992	20.8394
Mean	19.9731	20.517	20.5145	22.4478	20.0301	20.8507
∆ CT	0	0.543821	0.541358	2.47463	0.0569509	0.877517
fold change	1	0.685952	0.687124	0.179912	0.961294	0.544304

## Sheet: Ctip2 C1
Ctip2 C1	CTs																									Normalized % Ctip2 C1
	WT1 F-1	WT1 F-2	WT1 F-3	WT1 F-4	WT1 F-5	WT1 F-6		WT1	1	2	3	4	5	6	Total		% in 1/6	% in 2/6	% in 3/6	% in 4/6	% in 5/6	% in 6/6				F1 (0r)	F2 (1r)	F3 (2&3)	F4 (4,5,6)	F5 (7-x)	F6 (x-y)	New F5 (F5+F6)= >7r
	25.1883			25.5687	22.9884	26.3842			Rluc																wt1	10.8438	16.0458	8.53083	22.0319	34.3883	8.15934	42.5477
		25.0089	26.6763		22.8256	25.9794			1	0.733811	0.492151	0.369271	1.49423	0.566128	4.65559		21.4796	15.7619	10.5712	7.93177	32.0954	12.1602			wt2	14.7658	17.7468	10.5017	20.4524	26.1599	10.3734	36.5333
	25.1146	25.0564	26.3645	25.5633		26.7842			Ctip2 C1														100		wt3	4.69244	10.9895	13.5905	17.3568	44.2418	9.12887	53.3707
Mean	25.1515	25.0327	26.5204	25.566	22.907	26.3826		raw	1	1.08583	0.387175	0.750265	4.73855	0.425978	8.3878		11.9221	12.9454	4.61593	8.94472	56.4934	5.07855										0
∆ CT	0	-0.1188	1.36894	0.414527	-2.24445	1.23115		norm.	1	1.47972	0.7867	2.03175	3.17124	0.752441	9.22184		10.8438	16.0458	8.53083	22.0319	34.3883	8.15934	100		315T1	12.8113	4.83064	9.32075	16.7263	48.5967	7.71434	56.311
fold change	1	1.08583	0.387175	0.750265	4.73855	0.425978																	100		315T2	5.56213	7.0974	14.1687	11.7505	42.9703	18.451	61.4213
								WT2	1	2	3	4	5	6	Total		% in 1/6	% in 2/6	% in 3/6	% in 4/6	% in 5/6	% in 6/6			315T3	12.3698	5.377	18.8739	9.5683	42.9973	10.8137	53.811
	WT2 F-1	WT2 F-2	WT2 F-3	WT2 F-4	WT2 F-5	WT1 F-6			Rluc
	23.8211	24.7733	25.6211	25.3621		26.6458			1	0.431836	0.443502	0.241212	0.0400699	0.204376	2.361		42.355	18.2904	18.7845	10.2165	1.69716	8.65634			Average wt Ctip2 C1/Rluc	10.1007	14.9273	10.8744	19.9471	34.93	9.22054	44.1506
	23.8353	24.7754	25.3645		27.5633	26.6108			Ctip2 C1														100		Average 315T Ctip2 C1/Rluc	10.2478	5.76835	14.1211	12.6817	44.8548	12.3263	57.1811
				25.4575	27.7255			raw	1	0.519016	0.315427	0.334107	0.07099	0.14358	2.38312		41.9618	21.7788	13.2359	14.0197	2.97887	6.02487			stdevwt	5.07763	3.51472	2.55034	2.37816	9.05314	1.10988	8.53238
Mean	23.8282	24.7743	25.4928	25.4098	27.6444	26.6283		norm.	1	1.20188	0.711219	1.38512	1.77165	0.702529	6.7724		14.7658	17.7468	10.5017	20.4524	26.1599	10.3734	100		Stdev 315T	4.06388	1.18297	4.77673	3.66871	3.24061	5.52584	3.87904
∆ CT	0	0.94615	1.66462	1.58162	3.81624	2.80008																	100		std error wt	2.93157	2.02922	1.47244	1.37303	5.22683	0.640788	4.92617
fold change	1	0.519016	0.315427	0.334107	0.07099	0.14358		WT3	1	2	3	4	5	6	Total		% in 1/6	% in 2/6	% in 3/6	% in 4/6	% in 5/6	% in 6/6			std erro 315T	2.34628	0.682986	2.75785	2.11813	1.87097	3.19034	2.23957
									Rluc
	WT3 F-1	WT3 F-2	WT3 F-3	WT3 F-4	WT3 F-5	WT1 F-6			1	0.193339	0.445126	0.0707538	0.259875	0.124056	2.09315		47.7749	9.23676	21.2659	3.38025	12.4155	5.92675			T-Test	0.970633	0.0128706	0.357679	0.0450918	0.148342	0.393912	0.0737144
		26.9236		27.7218	24.4155	27.7083			Ctip2 C1														100
	25.7149	26.8304	25.4063			27.8612		raw	1	0.452792	1.2892	0.26171	2.45018	0.241343	5.69522		17.5586	7.95039	22.6365	4.59526	43.0217	4.23764			1Tail T-test	0.485317	0.00643532	0.17884	0.0225459	0.0741709	0.196956	0.0368572
	25.7529		25.3286	27.614	24.4666			norm.	1	2.34196	2.89625	3.69889	9.42831	1.94544	21.3109		4.69244	10.9895	13.5905	17.3568	44.2418	9.12887	100				**		*			*
Mean	25.7339	17.1186	25.3674	27.6679	24.441	27.7848																	100
∆ CT	0	-0.958529	-0.366474	1.93396	-1.29289	2.05084
fold change	1	1	1.2892	0.26171	2.45018	0.241343		315T1	1	2	3	4	5	6	Total		% in 1/6	% in 2/6	% in 3/6	% in 4/6	% in 5/6	% in 6/6
									Rluc
									1	0.439298	0.202555	0.129529	0.347066	0.177392	2.29584		43.557	19.1345	8.8227	5.64191	15.1172	7.72667	100
									Ctip2 C1
								raw	1	0.165642	0.147367	0.169111	1.31651	0.106817	2.90545		34.4181	5.70108	5.07209	5.82049	45.3118	3.67643	100
	CTs							norm.	1	0.377061	0.72754	1.30558	3.79326	0.602151	7.8056		12.8113	4.83064	9.32075	16.7263	48.5967	7.71434	100
	315T1 F-1	315T1 F-2	315T1 F-3	315T1 F-4	315T1 F-5	315T1 F-6
	26.0929	28.7902	28.7455	28.7531	25.9909	29.3768		315T2	1	2	3	4	5	6	Total		% in 1/6	% in 2/6	% in 3/6	% in 4/6	% in 5/6	% in 6/6
	26.1213				25.5141	29.3753			Rluc
	26.2335	28.696	29.0779	28.6733					1	0.242268	0.354773	0.253151	0.579199	0.230539	2.65993		37.595	9.10807	13.3377	9.5172	21.775	8.6671	100
Mean	26.1492	28.7431	28.9117	28.7132	25.7525	29.376			Ctip2 C1
∆ CT	0	2.59386	2.76252	2.56396	-0.396721	3.22679		raw	1	0.30914	0.90373	0.534804	4.47462	0.764754	7.98704		12.5203	3.87051	11.3149	6.69589	56.0234	9.57494	100
fold change	1	0.165642	0.147367	0.169111	1.31651	0.106817		norm.	1	1.27602	2.54735	2.11259	7.72552	3.31725	17.9787		5.56213	7.0974	14.1687	11.7505	42.9703	18.451	100
	315T2 CxB-1	315T2 CxB-2	315T2 CxB-3	315T2 F-4	315T2 F-5	315T2 F-6		315T3	1	2	3	4	5	6	Total		% in 1/6	% in 2/6	% in 3/6	% in 4/6	% in 5/6	% in 6/6
		26.4774	24.8019	25.4976	22.6166	25.3861			Rluc
	24.7036	26.4992	24.9251		22.6491	24.9771			1	0.685952	0.687124	0.179912	0.961294	0.544304	4.05858		24.6391	16.9013	16.9301	4.43288	23.6854	13.4112	100
	24.8857		25.0951	25.8975					Ctip2 C1
Mean	24.7946	26.4883	24.9407	25.6976	22.6329	25.1816		raw	1	0.298174	1.04841	0.139165	3.34144	0.475827	6.30302		15.8654	4.73065	16.6335	2.20792	53.0133	7.5492	100
∆ CT	0	1.69367	0.146036	0.902919	-2.16176	0.386931		norm.	1	0.434686	1.5258	0.773518	3.47598	0.874195	8.08418		12.3698	5.377	18.8739	9.5683	42.9973	10.8137	100
fold change	1	0.30914	0.90373	0.534804	4.47462	0.764754
	315T3 F-1	315T3 F-2	315T3 F-3	315T3 F-4	315T3 F-5	315T3 F-6
	26.2642			29.2341		27.1609
	26.1339	28.0613	26.1203	28.8543	24.4584	27.2738
		27.8283	26.1414		24.4588	27.377
Mean	26.1991	27.9448	26.1309	29.0442	24.4586	27.2706
∆ CT	0	1.74577	-0.0682049	2.84513	-1.74047	1.07149
fold change	1	0.298174	1.04841	0.139165	3.34144	0.475827
Rluc	CTs
	WT1 F-1	WT1 F-2	WT1 F-3	WT1 F-4	WT1 F-5	WT1 F-6
	20.4178	20.8968	21.4846	21.8963	19.8027
	20.466	20.8801		21.8812	19.8498	21.2992
			21.445	21.86	19.935	21.2263
Mean	20.4419	20.8885	21.4648	21.8792	19.8625	21.2627											0
∆ CT	0	0.44652	1.02283	1.43725	-0.5794	0.820799
fold change	1	0.733811	0.492151	0.369271	1.49423	0.566128
	WT2 F-1	WT2 F-2	WT2 F-3	WT2 F-4	WT2 F-5	WT1 F-6
	19.4546			21.6152	24.1864	21.8793
	19.5906	20.7901	20.7499	21.6195	24.2421	21.8509
	19.6736	20.7786	20.7419	21.6389		21.8607
Mean	19.5729	20.7844	20.7459	21.6246	24.2143	21.8636
∆ CT	0	1.21144	1.17299	2.05163	4.64134	2.2907
fold change	1	0.431836	0.443502	0.241212	0.0400699	0.204376
	WT3 F-1	WT3 F-2	WT3 F-3	WT3 F-4	WT3 F-5	WT1 F-6
	18.1628	20.4745	19.2643	21.8672	19.956	21.0597
	17.9941	20.4414	19.2455	21.9054	20.1065	21.1365
	18.1045			21.952
Mean	18.0872	20.458	19.2549	21.9082	20.0313	21.0981
∆ CT	0	2.37079	1.16771	3.82105	1.94411	3.01094
fold change	1	0.193339	0.445126	0.0707538	0.259875	0.124056
	CTs
	315T1 F-1	315T1 F-2	315T1 F-3	315T1 F-4	315T1 F-5	315T1 F-6
	19.4681	20.6694	21.8004	22.387	20.973
	19.4502	20.6425	21.7251	22.4286	20.9988	21.9548
		20.6258				21.9535
Mean	19.4592	20.6459	21.7628	22.4078	20.9859	21.9542
∆ CT	0	1.18673	2.30361	2.94865	1.52672	2.49499
fold change	1	0.439298	0.202555	0.129529	0.347066	0.177392
	315T2 CxB-1	315T2 CxB-2	315T2 CxB-3	315T2 F-4	315T2 F-5	315T2 F-6
	19.7962				20.5784
		21.8676	21.3451	21.8019	20.6335	21.9358
	19.8399	21.8591	21.2811	21.7981		21.9342
Mean	19.8181	21.8634	21.3131	21.8	20.6059	21.935
∆ CT	0	2.04532	1.49503	1.98193	0.787868	2.11692
fold change	1	0.242268	0.354773	0.253151	0.579199	0.230539
	315T3 F-1	315T3 F-2	315T3 F-3	315T3 F-4	315T3 F-5	315T3 F-6
		20.5193	20.532	22.4734	20.0562	20.8619
	19.9802	20.5146	20.497	22.423	20.0349
	19.9661			22.4469	19.9992	20.8394
Mean	19.9731	20.517	20.5145	22.4478	20.0301	20.8507
∆ CT	0	0.543821	0.541358	2.47463	0.0569509	0.877517
fold change	1	0.685952	0.687124	0.179912	0.961294	0.544304

## Sheet: Rorb
rorb	CTs																									Normalized % rorb
	WT1 F-1	WT1 F-2	WT1 F-3	WT1 F-4	WT1 F-5	WT1 F-6		WT1	1	2	3	4	5	6	Total		% in 1/6	% in 2/6	% in 3/6	% in 4/6	% in 5/6	% in 6/6				F1	F2	F3	F4	F5	F6
	24.5879	27.9686	27.4471	30.6813	29.339	31.6753			Rluc																wt1	14.5963	21.1936	28.2708	13.8586	21.0814	0.999308
	24.1636	27.3895	26.0854	30.8582	29.5772	30.7739			1	0.0752522	0.087914	0.0154968	0.027207	0.144949	1.35082		74.0291	5.57085	6.50819	1.14721	2.01411	10.7305			wt2	5.7405	12.6219	27.1522	33.7151	19.3343	1.43604
	24.4073	27.383	27.2884	29.8794	28.251	30.6743			rorb														100		wt3	10.3521	11.0796	27.3097	29.0069	21.8743	0.377455
Mean	24.3863	27.5804	26.9403	30.473	29.0558	31.0412		raw	1	0.109265	0.170276	0.0147136	0.039295	0.00992368	1.34347		74.434	8.13302	12.6743	1.09519	2.92488	0.738659
∆ CT	0	3.1941	2.55406	6.08671	4.66951	6.65491		norm.	1	1.45198	1.93685	0.94946	1.4443	0.068463	6.85105		14.5963	21.1936	28.2708	13.8586	21.0814	0.999308	100		315T1	4.44406	45.9045	19.8218	15.6296	13.8609	0.339054
fold change	1	0.109265	0.170276	0.0147136	0.039295	0.00992368																	100		315T2	11.5919	20.0219	45.0311	12.0642	11.1546	0.13623
								WT2	1	2	3	4	5	6	Total		% in 1/6	% in 2/6	% in 3/6	% in 4/6	% in 5/6	% in 6/6			315T3	15.4467	42.0825	18.676	16.987	6.35911	0.448681
	WT2 F-1	WT2 F-2	WT2 F-3	WT2 F-4	WT2 F-5	WT1 F-6			Rluc
	24.886	26.9002	26.3154	25.3047	26.4983	Undetermined			1	0.101577	0.0959725	0.188255	0.0552485	0.00812105	1.44917		69.0048	7.0093	6.62256	12.9905	3.81242	0.560392			Average wt Rorbeta/Rluc	10.2296	14.965	27.5776	25.5269	20.7633	0.937602	100
	25.3675	27.7413	26.7192	25.2273	28.5366	34.0761			rorb														100		Average 315T Rorbeta/Rluc	10.4942	36.003	27.843	14.8936	10.4582	0.307989	100
	25.4416	27.5415	26.0787	24.7283	27.9382	34.2737		raw	1	0.223342	0.453944	1.10566	0.18608	0.00203156	2.97105		33.6581	7.51727	15.2789	37.2143	6.26309	0.0683785			stdevwt	4.42918	5.44895	0.605492	10.3756	1.29951	0.531985
Mean	25.2317	27.3944	26.3711	25.0868	27.6577	34.1749		norm.	1	2.19875	4.72994	5.8732	3.36805	0.25016	17.4201		5.7405	12.6219	27.1522	33.7151	19.3343	1.43604	100		Stdev 315T	5.58285	13.9713	14.8964	2.54257	3.79905	0.158525
∆ CT	0	2.16267	1.13941	-0.144904	2.42601	8.94319																	100		std error wt	2.55719	3.14595	0.349581	5.99035	0.750275	0.307142
fold change	1	0.223342	0.453944	1.10566	0.18608	0.00203156		WT3	1	2	3	4	5	6	Total		% in 1/6	% in 2/6	% in 3/6	% in 4/6	% in 5/6	% in 6/6			std erro 315T	3.22326	8.06634	8.60044	1.46795	2.19338	0.0915245
									Rluc
	WT3 F-1	WT3 F-2	WT3 F-3	WT3 F-4	WT3 F-5	WT1 F-6			1	0.0745267	0.0729486	0.118622	0.0347041	0.0331099	1.33391		74.9675	5.58708	5.46878	8.89279	2.60168	2.48217			T-Test	0.951811	0.071992	0.976878	0.159791	0.0112867	0.120923
	23.8185	27.2755	26.4016	25.8363	28.5954	33.9144			rorb														100		1 Tail T-test	0.475905	0.035996	0.488439	0.0798954	0.00564336	0.0604615
	24.4499	27.2862	25.8212	24.5885	27.6572	34.1016		raw	1	0.0797642	0.192446	0.332384	0.0733309	0.00120725	1.67913		59.5546	4.75032	11.461	19.795	4.36719	0.0718971					*			**
	23.7875	28.4387	26.9656	26.3984	27.1116	33.1222		norm.	1	1.07028	2.6381	2.80204	2.11303	0.0364618	9.65991		10.3521	11.0796	27.3097	29.0069	21.8743	0.377455	100
Mean	24.0187	27.6668	26.3961	25.6077	27.7881	33.7127																	100
∆ CT	0	3.64812	2.37748	1.58908	3.76944	9.69406
fold change	1	0.0797642	0.192446	0.332384	0.0733309	0.00120725		315T1	1	2	3	4	5	6	Total		% in 1/6	% in 2/6	% in 3/6	% in 4/6	% in 5/6	% in 6/6
									Rluc
									1	0.0136312	0.157139	0.111351	0.0980851	0.113428	1.49364		66.9508	0.91262	10.5206	7.45504	6.56687	7.59412	100
									rorb
								raw	1	0.140802	0.700888	0.391619	0.305924	0.0086539	2.54789		39.2482	5.52625	27.5086	15.3703	12.007	0.33965	100
	CTs							norm.	1	10.3294	4.4603	3.51697	3.11896	0.0762939	22.5019		4.44406	45.9045	19.8218	15.6296	13.8609	0.339054	100
	315T1 F-1	315T1 F-2	315T1 F-3	315T1 F-4	315T1 F-5	315T1 F-6
	24.3104	27.4798	26.2884	25.8282	26.8586	31.9335		315T2	1	2	3	4	5	6	Total		% in 1/6	% in 2/6	% in 3/6	% in 4/6	% in 5/6	% in 6/6
	25.4746	27.9867	25.105	26.4182	26.1827	32.2511			Rluc
	25.0072	27.8104	24.937	26.6032	26.8771	31.1649			1	0.0514238	0.149379	0.388611	0.260661	0.415749	2.26583		44.134	2.26954	6.59271	17.151	11.504	18.3487	100
Mean	24.9307	27.759	25.4435	26.2832	26.6395	31.7832			rorb
∆ CT	0	2.82826	0.512744	1.35248	1.70876	6.85243		raw	1	0.0888214	0.580297	0.404448	0.250828	0.00488599	2.32928		42.9317	3.81325	24.9131	17.3636	10.7685	0.209764	100
fold change	1	0.140802	0.700888	0.391619	0.305924	0.0086539		norm.	1	1.72724	3.88472	1.04075	0.962276	0.0117522	8.62674		11.5919	20.0219	45.0311	12.0642	11.1546	0.13623	100
	315T2 CxB-1	315T2 CxB-2	315T2 CxB-3	315T2 F-4	315T2 F-5	315T2 F-6		315T3	1	2	3	4	5	6	Total		% in 1/6	% in 2/6	% in 3/6	% in 4/6	% in 5/6	% in 6/6
	25.1352	27.8276	25.1128	26.1979	26.9428	32.4363			Rluc
	24.6639	28.5592	25.9444	26.0862	26.6749	33.2277			1	0.0265556	0.192372	0.225588	0.262778	0.18391	1.8912		52.8764	1.40416	10.1719	11.9283	13.8948	9.72449	100
	24.5685	28.4596	25.6657	26.0014	26.7354	31.735			rorb
Mean	24.7892	28.2821	25.5743	26.0952	26.7844	32.4663		raw	1	0.0723472	0.232589	0.248083	0.108181	0.00534204	1.66654		60.0045	4.34116	13.9564	14.8861	6.49132	0.320546	100
∆ CT	0	3.49295	0.785136	1.30597	1.99523	7.67713		norm.	1	2.72437	1.20906	1.09972	0.41168	0.029047	6.47387		15.4467	42.0825	18.676	16.987	6.35911	0.448681	100
fold change	1	0.0888214	0.580297	0.404448	0.250828	0.00488599
	315T3 F-1	315T3 F-2	315T3 F-3	315T3 F-4	315T3 F-5	315T3 F-6
	25.4893	29.2897	27.6084	27.677	28.7092	Undetermined
	25.7032	29.3153	28.5276	27.5242	28.6392	32.3734
	25.673	29.6272	27.0418	27.6975	29.1425	33.967
Mean	25.6218	29.4107	27.726	27.6329	28.8303	33.1702
∆ CT	0	3.78892	2.10415	2.01111	3.20849	7.54839
fold change	1	0.0723472	0.232589	0.248083	0.108181	0.00534204
Rluc	CTs
	WT1 F-1	WT1 F-2	WT1 F-3	WT1 F-4	WT1 F-5	WT1 F-6
	19.409	22.7915	22.7092	25.2896	24.5671	22.2357
	19.4056	23.0748	23.1389	25.3439	24.6027	22.3375
	19.3124	23.4572	22.8023	25.5293	24.557	21.9131
Mean	19.3757	23.1078	22.8835	25.3876	24.5756	22.1621
∆ CT	0	3.73212	3.50776	6.01189	5.19988	2.78638
fold change	1	0.0752522	0.087914	0.0154968	0.027207	0.144949
	WT2 F-1	WT2 F-2	WT2 F-3	WT2 F-4	WT2 F-5	WT1 F-6
	19.5536	22.6852	22.7374	21.7465	23.9002	26.4234
	19.6187	22.8441	22.8743	21.9337	23.6766	26.3616
	19.418	22.959	23.1223	22.1377	23.5472	26.6376
Mean	19.5301	22.8294	22.9113	21.9393	23.708	26.4742
∆ CT	0	3.29936	3.38124	2.40924	4.17792	6.94412
fold change	1	0.101577	0.0959725	0.188255	0.0552485	0.00812105
	WT3 F-1	WT3 F-2	WT3 F-3	WT3 F-4	WT3 F-5	WT1 F-6
	19.3503	22.8848	23.2705	22.2995	24.6913	24.1364
	19.1775	23.1278	23.2714	22.4607	24.062	24.0963
	19.4165	23.17	22.7333	22.4108	23.7372	24.4613
Mean	19.3148	23.0609	23.0917	22.3903	24.1635	24.2314
∆ CT	0	3.7461	3.77698	3.07556	4.84875	4.91659
fold change	1	0.0745267	0.0729486	0.118622	0.0347041	0.0331099
	CTs
	315T1 F-1	315T1 F-2	315T1 F-3	315T1 F-4	315T1 F-5	315T1 F-6
	20.458	26.8982	23.1957	23.7343	23.9027	23.6735
	20.8526	26.6676	23.2511	23.792	24.0787	23.8115
	20.4519	26.7874	23.3253	23.7365	23.8305	23.6979
Mean	20.5875	26.7844	23.2574	23.7543	23.9373	23.7276
∆ CT	0	6.19694	2.66988	3.16681	3.34982	3.14015
fold change	1	0.0136312	0.157139	0.111351	0.0980851	0.113428
	315T2 CxB-1	315T2 CxB-2	315T2 CxB-3	315T2 F-4	315T2 F-5	315T2 F-6
	22.1244	26.3471	24.7805	23.4311	24.0103	23.453
	21.9949	26.315	24.733	23.3422	23.9923	23.0421
	21.9816	26.2831	24.8163	23.4184	23.9175	23.4045
Mean	22.0336	26.3151	24.7766	23.3972	23.9734	23.2999
∆ CT	0	4.28142	2.74295	1.3636	1.93975	1.26621
fold change	1	0.0514238	0.149379	0.388611	0.260661	0.415749
	315T3 F-1	315T3 F-2	315T3 F-3	315T3 F-4	315T3 F-5	315T3 F-6
	20.9344	26.1314	23.3844	23.1521	22.955	23.4794
	20.9711	26.2176	23.2731	23.0235	22.7891	23.3698
	20.9649	26.226	23.347	23.1396	22.9106	23.3501
Mean	20.9568	26.1917	23.3348	23.1051	22.8849	23.3997
∆ CT	0	5.23484	2.37803	2.14824	1.92808	2.44293
fold change	1	0.0265556	0.192372	0.225588	0.262778	0.18391

## Sheet: Fezf2
Fezf2	CTs																									Normalized % Fezf2
	WT1 F-1	WT1 F-2	WT1 F-3	WT1 F-4	WT1 F-5	WT1 F-6		WT1	1	2	3	4	5	6	Total		% in 1/6	% in 2/6	% in 3/6	% in 4/6	% in 5/6	% in 6/6				F1 (0r)	F2 (1r)	F3 (2+3 r)	F4 (4,5,6)	F5 (7-x)	F6 (x-y)
	24.5871	24.8695	24.5824	25.6982	24.8885				Rluc																wt1	18.2389	19.7797	28.0262	23.1784	10.2875	0.489254
	24.4353	24.3934	24.427	25.2144	24.5199	30.5403			1	0.848359	0.628579	0.432435	1.63372	0.649807	5.1929		19.257	16.3369	12.1046	8.32741	31.4607	12.5134			wt2	16.5222	24.2133	15.9547	17.3456	25.2039	0.760304
			24.6744	25.212	24.479	30.1665			Fezf2														100		wt3	7.11392	29.9228	28.57	19.4869	14.2999	0.60649
Mean	24.5112	24.6314	24.5613	25.3749	24.6291	30.3534		raw	1	0.920024	0.965883	0.549547	0.92149	0.0174309	4.37437		22.8604	21.0321	22.0805	12.5629	21.0656	0.398477
∆ CT	0	0.120256	0.05008	0.863686	0.11796	5.84221		norm.	1	1.08447	1.53661	1.27082	0.564043	0.0268247	5.48277		18.2389	19.7797	28.0262	23.1784	10.2875	0.489254	100		T1	13.8546	16.8664	19.5694	33.8185	14.8071	1.08393
fold change	1	0.920024	0.965883	0.549547	0.92149	0.0174309																	100		T2	11.5692	32.6622	18.4664	24.1262	11.091	2.08494
								WT2	1	2	3	4	5	6	Total		% in 1/6	% in 2/6	% in 3/6	% in 4/6	% in 5/6	% in 6/6			T3	15.1404	16.5814	25.6628	22.3687	17.2788	2.96799
	WT2 F-1	WT2 F-2	WT2 F-3	WT2 F-4	WT2 F-5	WT1 F-6			Rluc
	23.9138		24.9302	25.7514					1	0.505937	0.476322	0.252907	0.0448052	0.249699	2.52967		39.5308	20.0001	18.8294	9.99761	1.77119	9.87081			Average wt Fezf2/Rluc	13.9584	24.6386	24.1836	20.0036	16.5971	0.618682
	23.5007	23.9307		25.1217	27.5666	29.8447			Fezf2														100		Average T Fezf2/Rluc	13.5214	22.0367	21.2329	26.7711	14.3923	2.04562
	23.1557	23.9792	24.3575		27.2221	30.0889		raw	1	0.74145	0.459963	0.26551	0.0683483	0.0114904	2.54676		39.2655	29.1134	18.0607	10.4254	2.68373	0.451177			stdevwt	5.98929	5.08491	7.13162	2.95053	7.71894	0.135935
Mean	23.5234	23.955	24.6438	25.4366	27.3944	29.9668		norm.	1	1.4655	0.965655	1.04984	1.52545	0.0460171	6.05246		16.5222	24.2133	15.9547	17.3456	25.2039	0.760304	100		Stdev T	1.80874	9.20309	3.87583	6.16616	3.11471	0.942647
∆ CT	0	0.431579	1.12041	1.91316	3.87095	6.44343																	100		std error wt	3.45792	2.93577	4.11744	1.70349	4.45653	0.0784823
fold change	1	0.74145	0.459963	0.26551	0.0683483	0.0114904		WT3	1	2	3	4	5	6	Total		% in 1/6	% in 2/6	% in 3/6	% in 4/6	% in 5/6	% in 6/6			std erro T	1.04427	5.31341	2.23771	3.56003	1.79828	0.544238
									Rluc
	WT3 F-1	WT3 F-2	WT3 F-3	WT3 F-4	WT3 F-5	WT1 F-6			1	0.200871	0.470679	0.0868113	0.272703	0.131887	2.16295		46.2331	9.2869	21.761	4.01356	12.6079	6.09754			T-Test	0.909552	0.690275	0.563086	0.161537	0.670207	0.0603613
	25.8889	25.8531		27.4533		31.9217			Fezf2														100
	25.2262	25.6666	24.9414	27.7913	26.4185			raw	1	0.84491	1.89028	0.237799	0.548169	0.0112439	4.5324		22.0634	18.6416	41.7059	5.24665	12.0944	0.248077
	25.5353	25.8601	24.3217		26.4163	32.128		norm.	1	4.20623	4.01607	2.73927	2.01013	0.085254	14.057		7.11392	29.9228	28.57	19.4869	14.2999	0.60649	100
Mean	25.5501	25.7932	24.6315	27.6223	26.4174	32.0248																	100
∆ CT	0	0.24313	-0.918599	2.07218	0.867309	6.47472
fold change	1	0.84491	1.89028	0.237799	0.548169	0.0112439		T1	1	2	3	4	5	6	Total		% in 1/6	% in 2/6	% in 3/6	% in 4/6	% in 5/6	% in 6/6
									Rluc
									1	0.393347	0.214379	0.10645	0.356431	0.161486	2.23209		44.801	17.6224	9.60439	4.76905	15.9685	7.23475	100
									Fezf2
								raw	1	0.478854	0.302806	0.259839	0.380935	0.012634	2.43507		41.0666	19.6649	12.4352	10.6707	15.6437	0.518837	100
	CTs							norm.	1	1.21738	1.41248	2.44096	1.06875	0.0782358	7.2178		13.8546	16.8664	19.5694	33.8185	14.8071	1.08393	100
	T1 F-1	T1 F-2	T1 F-3	T1 F-4	T1 F-5	T1 F-6
	26.7675		28.4321	28.8373	28.1072			T2	1	2	3	4	5	6	Total		% in 1/6	% in 2/6	% in 3/6	% in 4/6	% in 5/6	% in 6/6
	26.9275	27.907	28.6039			33.315			Rluc
	26.6884	27.8066		28.6402	28.2664	32.887			1	0.247129	0.412707	0.264551	0.641898	0.268631	2.83492		35.2744	8.71734	14.558	9.33187	22.6426	9.47581	100
Mean	26.7945	27.8568	28.518	28.7388	28.1868	33.101			Fezf2
∆ CT	0	1.06234	1.72353	1.94431	1.39238	6.30654		raw	1	0.697694	0.65875	0.551688	0.615362	0.0484112	3.57191		27.9963	19.5328	18.4425	15.4452	17.2278	1.35533	100
fold change	1	0.478854	0.302806	0.259839	0.380935	0.012634		norm.	1	2.8232	1.59617	2.08538	0.95866	0.180214	8.64362		11.5692	32.6622	18.4664	24.1262	11.091	2.08494	100
	T2 CxB-1	T2 CxB-2	T2 CxB-3	T2 F-4	T2 F-5	T2 F-6		T3	1	2	3	4	5	6	Total		% in 1/6	% in 2/6	% in 3/6	% in 4/6	% in 5/6	% in 6/6
		25.637	25.3098	25.7366	25.6306	29.1419			Rluc
	24.8206	25.0658	25.4628			29.2592			1	0.636479	0.639875	0.194402	0.973036	0.625401	4.06919		24.5749	15.6414	15.7249	4.7774	23.9123	15.3692	100
	24.8435		25.5301	25.6436	25.4345				Fezf2
Mean	24.8321	25.3514	25.4343	25.6901	25.5326	29.2006		raw	1	0.697058	1.08458	0.287213	1.11047	0.122598	4.30192		23.2454	16.2034	25.2116	6.67639	25.8133	2.84985	100
∆ CT	0	0.519334	0.602196	0.858074	0.700493	4.36852		norm.	1	1.09518	1.69499	1.47742	1.14124	0.196032	6.60486		15.1404	16.5814	25.6628	22.3687	17.2788	2.96799	100
fold change	1	0.697694	0.65875	0.551688	0.615362	0.0484112
	T3 F-1	T3 F-2	T3 F-3	T3 F-4	T3 F-5	T3 F-6
	26.9111			28.7816	26.1935	29.7901
	26.6283	27.1509	26.7606	28.3175	26.9875
	26.7098	27.3899	26.5046		26.6148	29.7654
Mean	26.7498	27.2704	26.6326	28.5496	26.5986	29.7777
∆ CT	0	0.52065	-0.117137	1.79981	-0.151169	3.02799
fold change	1	0.697058	1.08458	0.287213	1.11047	0.122598
Rluc	CTs
	WT1 F-1	WT1 F-2	WT1 F-3	WT1 F-4	WT1 F-5	WT1 F-6
	19.246	19.4379	19.8177	20.4188	18.4975	19.9925
	19.1077	19.3523	19.828	20.4551	18.4933	19.613
	19.2063	19.4816	19.9238	20.3145	18.4447	19.8203
Mean	19.1867	19.4239	19.8565	20.3961	18.4785	19.8086
∆ CT	0	0.237253	0.669833	1.20945	-0.708164	0.621916
fold change	1	0.848359	0.628579	0.432435	1.63372	0.649807
	WT2 F-1	WT2 F-2	WT2 F-3	WT2 F-4	WT2 F-5	WT1 F-6
	18.3062	19.437	19.3348	20.2683	22.77	20.2973
	18.3575	19.0925	19.4197	20.3763	22.7972	20.4026
	18.2362	19.3194	19.3554	20.2053	22.7734	20.2052
Mean	18.3	19.2829	19.37	20.2833	22.7802	20.3017
∆ CT	0	0.98297	1.06999	1.98332	4.48019	2.00174
fold change	1	0.505937	0.476322	0.252907	0.0448052	0.249699
	WT3 F-1	WT3 F-2	WT3 F-3	WT3 F-4	WT3 F-5	WT1 F-6
	16.7656	18.7077	17.7742	20.1875	18.6479	19.5625
	16.5926	18.9546	17.7472	Undetermined	18.646	19.7433
	16.7299	19.3728	17.8283	20.2565	18.4179	19.5501
Mean	16.696	19.0117	17.7832	20.222	18.5706	19.6187
∆ CT	0	2.31566	1.08719	3.52597	1.8746	2.92263
fold change	1	0.200871	0.470679	0.0868113	0.272703	0.131887
	CTs
	T1 F-1	T1 F-2	T1 F-3	T1 F-4	T1 F-5	T1 F-6
	18.3444	19.3375	20.2609	21.0021	19.5196	20.6743
	17.6148	19.3073	20.1164	21.4405	19.3318	20.5385
	17.8625	19.2153	20.1097	21.0744	19.4352	20.5005
Mean	17.9406	19.2867	20.1623	21.1723	19.4289	20.5711
∆ CT	0	1.34612	2.22176	3.23176	1.48831	2.63052
fold change	1	0.393347	0.214379	0.10645	0.356431	0.161486
	T2 CxB-1	T2 CxB-2	T2 CxB-3	T2 F-4	T2 F-5	T2 F-6
	18.5272	20.6063	19.8592	20.5117	19.2033	20.5638
	18.7037	20.5532	19.7452	20.3141	19.1811	20.2964
	18.4219	20.5433	19.8788	20.5821	19.1871	20.4815
Mean	18.5509	20.5676	19.8277	20.4693	19.1905	20.4472
∆ CT	0	2.01666	1.27681	1.91838	0.639584	1.8963
fold change	1	0.247129	0.412707	0.264551	0.641898	0.268631
	T3 F-1	T3 F-2	T3 F-3	T3 F-4	T3 F-5	T3 F-6
	18.5926	19.0578	19.0507	20.8258	18.4886	18.9223
	18.2445	19.22	18.9229	20.7608	18.4337	19.1186
	18.415	18.9298	19.2109	20.7543	18.4482	19.2427
Mean	18.4174	19.0692	19.0615	20.7803	18.4568	19.0945
∆ CT	0	0.651815	0.644139	2.36289	0.0394347	0.677148
fold change	1	0.636479	0.639875	0.194402	0.973036	0.625401
