# Supplementary material for: Pum2 and TDP-43 refine area-specific cytoarchitecture post-mitotically and modulate translation of Sox5, Bcl11b, and Rorb mRNAs in developing mouse neocortex
Source: eLife. 2022 Mar 9;11:e55199. doi: 10.7554/eLife.55199 (PMC8906809; doi:10.7554/eLife.55199)
Supplement: Source data 17. — Quantification of results from n = 3 experiments of polysome profiling on Pum2 cKO prospective somatosensory area (pS)-enriched cortices at P0 (Figure 8d). Histograms depict the distribution of the Sox5, Bcl11b, Rorb, and Fezf2 mRNAs across the gradient fractions for Pum2 cKO relative to corresponding controls (Ctrl). Samples in heavier gradient fractions were virtually pooled at analysis to simplify visualization. Levels of specific mRNAs in each fraction were analyzed by qRT-PCR with normalization to an RLuc mRNA spike-in control, which was added in an equal amount to the fractions prior to RNA preparation. Data are shown as means ± standard error of the mean (SEM), n = 3 for each genotype. *p≤0.05, **p≤0.01, one-tailed t-test. Pum2 cKO: Pum2fl/fl; Emx1Cre. [file elife-55199-data17.xlsx]

## Sheet: Sox5 S3
Sox5 S3	CTs																									Normalized % Sox5 S3
	WT1 F-1	WT1 F-2	WT1 F-3	WT1 F-4	WT1 F-5	WT1 F-6		WT1	1	2	3	4	5	6	Total		% in 1/6	% in 2/6	% in 3/6	% in 4/6	% in 5/6	% in 6/6				F1 (0r)	F2 (1r)	F3(2&3 r)	F4(4,5,6)	F5 (7-x)	F6(x-y)	New F5 (>7)
				32.9674	31.7891	29.8258			Rluc																wt1	31.1718	31.2147	14.0429	12.4829	7.10593	3.98179	11.0877
	25.1018	29.1114	30.3419			30.4397			1	0.0633947	0.0627932	0.0121788	0.0387791	0.240561	1.41771		70.5364	4.47164	4.42921	0.859047	2.73534	16.9683			wt2	23.8999	48.6366	5.82723	10.7734	8.37174	2.49114	10.8629
	25.1152	29.0606	30.1624	32.6091	32.0713				Sox5 S3														100		wt3	29.7701	16.6998	9.45491	15.8888	17.2893	10.8971	28.1864
Mean	25.1085	29.086	30.2521	32.7883	31.9302	30.1328		raw	1	0.0634819	0.0282883	0.00487703	0.00884008	0.0307285	1.13622		88.0114	5.58714	2.48969	0.429234	0.778028	2.70446										0
∆ CT	0	3.97751	5.14365	7.67978	6.82172	5.02428		norm.	1	1.00138	0.450499	0.400453	0.22796	0.127737	3.20802		31.1718	31.2147	14.0429	12.4829	7.10593	3.98179	100		cko1	19.2454	37.6266	14.9079	8.19415	17.5601	2.46595	20.026
fold change	1	0.0634819	0.0282883	0.00487703	0.00884008	0.0307285																	100		cko2	16.3934	39.8124	16.9375	9.64848	15.2061	2.00212	17.2082
								WT2	1	2	3	4	5	6	Total		% in 1/6	% in 2/6	% in 3/6	% in 4/6	% in 5/6	% in 6/6			cko3	15.9972	15.0588	16.593	16.4561	32.2063	3.68865	35.8949
	WT2 F-1	WT2 F-2	WT2 F-3	WT2 F-4	WT2 F-5	WT1 F-6			Rluc
	26.0719	29.8714	31.3541	29.5439		36.8042			1	0.0401945	0.105493	0.195847	0.0753157	0.0068017	1.42365		70.2419	2.82334	7.41002	13.7567	5.29032	0.477764			Average wt Sox5 S3/Rluc	28.2806	32.1837	9.775	13.0483	10.9223	5.78999	16.7123
	26.0959		31.3755	29.6274	31.5448	36.2877			Sox5 S3														100		Average CKO Sox5 S3/Rluc	17.212	30.8326	16.1461	11.4329	21.6575	2.7189	24.3764
		29.5201			31.1116			raw	1	0.0817962	0.025721	0.088282	0.0263818	0.000708956	1.22289		81.7735	6.68876	2.1033	7.21913	2.15733	0.0579738			stdevwt	3.85799	15.9905	4.11716	2.6042	5.55019	4.4852	9.93746
Mean	26.0839	29.6957	31.3648	29.5856	31.3282	36.5459		norm.	1	2.03501	0.243818	0.45077	0.350283	0.104232	4.18411		23.8999	48.6366	5.82723	10.7734	8.37174	2.49114	100		Stdev cko	1.77207	13.7042	1.08608	4.41058	9.21102	0.871257	10.0743
∆ CT	0	3.61182	5.28091	3.50174	5.24431	10.462																	100		std error wt	2.22741	9.2321	2.37705	1.50353	3.2044	2.58953	5.73739
fold change	1	0.0817962	0.025721	0.088282	0.0263818	0.000708956		WT3	1	2	3	4	5	6	Total		% in 1/6	% in 2/6	% in 3/6	% in 4/6	% in 5/6	% in 6/6			std erro cko	1.02311	7.91211	0.62705	2.54645	5.31799	0.503021	5.81643
									Rluc
	WT3 F-1	WT3 F-2	WT3 F-3	WT3 F-4	WT3 F-5	WT1 F-6			1	0.0719457	0.0895561	0.119305	0.0426823	0.0258125	1.3493		74.1124	5.33207	6.63722	8.84196	3.16329	1.91303			T-Test	0.0106934	0.916871	0.0605812	0.613921	0.158864	0.309047	0.401315
		29.2788				31.6358			Sox5 S3														100
	25.096	30.1359	30.3452	29.1978	30.2934			raw	1	0.0403584	0.0284428	0.063675	0.0247882	0.00944842	1.16671		85.7109	3.45916	2.43786	5.45764	2.12462	0.809833				0.00534671	0.458435	0.0302906	0.306961	0.079432	0.154523	0.200658
	25.0977	29.7689	30.1201	28.9421	30.5687	32.0093		norm.	1	0.560957	0.317597	0.533717	0.580761	0.36604	3.35907		29.7701	16.6998	9.45491	15.8888	17.2893	10.8971	100			**		*
Mean	25.0968	29.7278	30.2326	29.07	30.431	31.8226																	100
∆ CT	0	4.63099	5.13579	3.97313	5.3342	6.72571
fold change	1	0.0403584	0.0284428	0.063675	0.0247882	0.00944842		cko1	1	2	3	4	5	6	Total		% in 1/6	% in 2/6	% in 3/6	% in 4/6	% in 5/6	% in 6/6
									Rluc
									1	0.0368233	0.23675	0.20722	0.150083	0.127428	1.7583		56.873	2.09425	13.4647	11.7852	8.53567	7.2472	100
									Sox5 S3
								raw	1	0.071993	0.183391	0.0882286	0.136941	0.0163276	1.49688		66.8056	4.80953	12.2516	5.89416	9.14839	1.09077	100
	CTs							norm.	1	1.9551	0.774621	0.425772	0.912431	0.128132	5.19605		19.2454	37.6266	14.9079	8.19415	17.5601	2.46595	100
	cko1 F-1	cko1 F-2	cko1 F-3	cko1 F-4	cko1 F-5	cko1 F-6
	25.8213	29.6548	28.1836			31.3695		cko2	1	2	3	4	5	6	Total		% in 1/6	% in 2/6	% in 3/6	% in 4/6	% in 5/6	% in 6/6
	25.8207	29.3884		29.2365	28.6353				Rluc
		29.8078	28.3524	29.4107	28.7435	32.1456			1	0.0307299	0.262288	0.27532	0.181061	0.0812233	1.83062		54.6262	1.67866	14.3278	15.0397	9.8907	4.43692	100
Mean	25.821	29.617	28.268	29.3236	28.6894	31.7575			Sox5 S3
∆ CT	0	3.796	2.447	3.50261	2.86838	5.93655		raw	1	0.0746293	0.270993	0.162042	0.167948	0.00991974	1.68553		59.3285	4.42764	16.0776	9.61369	9.96408	0.588523	100
fold change	1	0.071993	0.183391	0.0882286	0.136941	0.0163276		norm.	1	2.42856	1.03319	0.588558	0.927574	0.122129	6.10001		16.3934	39.8124	16.9375	9.64848	15.2061	2.00212	100
	cko2 CxB-1	cko2 CxB-2	cko2 CxB-3	cko2 F-4	cko2 F-5	cko2 F-6		cko3	1	2	3	4	5	6	Total		% in 1/6	% in 2/6	% in 3/6	% in 4/6	% in 5/6	% in 6/6
	26.0063	29.8029		28.7235	28.7436	32.5088			Rluc
	26.164		27.9259			32.9725			1	0.0516717	0.10935	0.0958282	0.0506822	0.02662	1.33415		74.954	3.873	8.19621	7.1827	3.79884	1.99527	100
		29.8556	28.0118	28.698	28.5746				Sox5 S3
Mean	26.0852	29.8293	27.9689	28.7107	28.6591	32.7407		raw	1	0.0486406	0.113423	0.0985774	0.102036	0.00613807	1.36881		73.0559	3.55348	8.28619	7.20166	7.45432	0.448422	100
∆ CT	0	3.74411	1.88367	2.62556	2.57392	6.65548		norm.	1	0.941339	1.03724	1.02869	2.01325	0.230581	6.2511		15.9972	15.0588	16.593	16.4561	32.2063	3.68865	100
fold change	1	0.0746293	0.270993	0.162042	0.167948	0.00991974
	cko3 F-1	cko3 F-2	cko3 F-3	cko3 F-4	cko3 F-5	cko3 F-6
	26.5594	30.7284	29.3117	29.7751	29.7074
	26.3501			29.8563	29.8245	33.9323
	26.5097	30.9412	29.9149			33.7098
Mean	26.4731	30.8348	29.6133	29.8157	29.7659	33.8211
∆ CT	0	4.36169	3.14022	3.3426	3.29285	7.348
fold change	1	0.0486406	0.113423	0.0985774	0.102036	0.00613807
Rluc	CTs
	WT1 F-1	WT1 F-2	WT1 F-3	WT1 F-4	WT1 F-5	WT1 F-6
		23.9403		26.3971		22.0017
	19.8984	23.9245	23.976	26.2278	24.3398	21.9916
	20.0075		23.9164		24.9432	22.0321
Mean	19.9529	23.9324	23.9462	26.3124	24.6415	22.0085											0
∆ CT	0	3.97949	3.99325	6.35949	4.68858	2.05552
fold change	1	0.0633947	0.0627932	0.0121788	0.0387791	0.240561
	WT2 F-1	WT2 F-2	WT2 F-3	WT2 F-4	WT2 F-5	WT1 F-6
	20.3319		23.6202	22.6877	24.0623	27.5634
		24.9763		22.6923	23.9825
	20.3437	24.9731	23.545		24.1614	27.512
Mean	20.3378	24.9747	23.5826	22.69	24.0687	27.5377
∆ CT	0	4.63686	3.24478	2.3522	3.73091	7.19989
fold change	1	0.0401945	0.105493	0.195847	0.0753157	0.0068017
	WT3 F-1	WT3 F-2	WT3 F-3	WT3 F-4	WT3 F-5	WT1 F-6
	20.1071	23.8851	23.5776	23.16	24.6626
		23.9068	23.5826		24.6359	25.5326
	20.0909			23.1727		25.2171
Mean	20.099	23.896	23.5801	23.1663	24.6493	25.3748
∆ CT	0	3.79695	3.48106	3.06728	4.55022	5.27578
fold change	1	0.0719457	0.0895561	0.119305	0.0426823	0.0258125
	CTs
	cko1 F-1	cko1 F-2	cko1 F-3	cko1 F-4	cko1 F-5	cko1 F-6
	20.674	25.4273		22.9353	23.3772
	20.6334		22.6896	22.9135	23.2864	23.6315
		25.4065	22.7749		23.5059	23.6203
Mean	20.6537	25.4169	22.7322	22.9244	23.3898	23.6259
∆ CT	0	4.76324	2.07856	2.27076	2.73617	2.97225
fold change	1	0.0368233	0.23675	0.20722	0.150083	0.127428
	cko2 CxB-1	cko2 CxB-2	cko2 CxB-3	cko2 F-4	cko2 F-5	cko2 F-6
	20.9792	25.9219		22.8012		24.57
		25.9797	22.8999	22.8446	23.4436
	20.942	26.0528	22.8828	22.8185	23.4086	24.5951
Mean	20.9606	25.9848	22.8914	22.8214	23.4261	24.5826
∆ CT	0	5.02422	1.93077	1.86082	2.46545	3.62196
fold change	1	0.0307299	0.262288	0.27532	0.181061	0.0812233
	cko3 F-1	cko3 F-2	cko3 F-3	cko3 F-4	cko3 F-5	cko3 F-6
	20.0387	24.3649		23.452	24.3797	25.2854
	20.0588	24.2815	23.2372
			23.2463	23.4123	24.3225	25.2748
Mean	20.0488	24.3232	23.2417	23.4322	24.3511	25.2801
∆ CT	0	4.27448	3.19298	3.38341	4.30238	5.23135
fold change	1	0.0516717	0.10935	0.0958282	0.0506822	0.02662

## Sheet: Ctip2 C2
Ctip2 C2	CTs																									Normalized % Ctip2 C2
	WT1 F-1	WT1 F-2	WT1 F-3	WT1 F-4	WT1 F-5	WT1 F-6		WT1	1	2	3	4	5	6	Total		% in 1/6	% in 2/6	% in 3/6	% in 4/6	% in 5/6	% in 6/6				F1 (0r)	F2 (1r)	F3(2&3 r)	F4(4,5,6)	F5 (7-x)	F6(x-y)	New F5 (>7)
	21.7851	26.1026	26.4624		27.5398				Rluc																wt1	35.4638	21.4993	21.0768	11.2921	10.4032	0.264764	10.668
		26.1948		29.7378	28.2703	30.4554			1	0.0633947	0.0627932	0.0121788	0.0387791	0.240561	1.41771		70.5364	4.47164	4.42921	0.859047	2.73534	16.9683			wt2	22.1808	43.935	7.77342	13.0431	11.8328	1.23483	13.0676
	21.1092		25.9198	29.1776		30.681			Ctip2 C2														100		wt3	31.0022	18.6623	15.028	16.3123	18.1611	0.834123	18.9952
Mean	21.4471	26.1487	26.1911	29.4577	27.905	30.5682		raw	1	0.0384319	0.0373191	0.00387788	0.0113757	0.00179597	1.0928		91.508	3.51683	3.415	0.354857	1.04097	0.164346										0
∆ CT	0	4.70155	4.74394	8.01052	6.4579	9.12102		norm.	1	0.606232	0.594318	0.318413	0.293347	0.00746576	2.81978		35.4638	21.4993	21.0768	11.2921	10.4032	0.264764	100		cko1	17.4558	23.2278	13.7169	12.7036	31.917	0.978924	32.8959
fold change	1	0.0384319	0.0373191	0.00387788	0.0113757	0.00179597																	100		cko2	24.6331	32.1444	16.803	7.76444	17.9277	0.727377	18.6551
								WT2	1	2	3	4	5	6	Total		% in 1/6	% in 2/6	% in 3/6	% in 4/6	% in 5/6	% in 6/6			cko3	16.5829	8.17282	22.2496	20.3739	30.8913	1.72951	32.6208
	WT2 F-1	WT2 F-2	WT2 F-3	WT2 F-4	WT2 F-5	WT1 F-6			Rluc
	22.7528	26.1208	27.3604	25.627	26.9592	Undetermined			1	0.0401945	0.105493	0.195847	0.0753157	0.0068017	1.42365		70.2419	2.82334	7.41002	13.7567	5.29032	0.477764			Average wt Ctip2 C2/Rluc	29.5489	28.0322	14.6261	13.5492	13.4657	0.777905	14.2436
	23.5937	26.2058		25.6344	27.3406	33.4125			Ctip2 C2														100		Average CKO Ctip2 C2/Rluc	19.5573	21.1817	17.5898	13.614	26.912	1.14527	28.0573
	21.191		27.1795			34.3461		raw	1	0.0796157	0.0369707	0.115165	0.0401786	0.000378657	1.27231		78.5973	6.25757	2.90579	9.05167	3.15793	0.0297614			stdevwt	6.75967	13.8451	6.66078	2.54806	4.12868	0.48747	4.28637
Mean	22.5125	26.1633	27.27	25.6307	27.1499	33.8793		norm.	1	1.98076	0.350456	0.588036	0.533469	0.055671	4.50839		22.1808	43.935	7.77342	13.0431	11.8328	1.23483	100		Stdev cko	4.41742	12.1161	4.32042	6.35382	7.79753	0.521366	8.14372
∆ CT	0	3.6508	4.75748	3.11822	4.63743	11.3668																	100		std error wt	3.9027	7.99345	3.8456	1.47112	2.3837	0.281441	2.47474
fold change	1	0.0796157	0.0369707	0.115165	0.0401786	0.000378657		WT3	1	2	3	4	5	6	Total		% in 1/6	% in 2/6	% in 3/6	% in 4/6	% in 5/6	% in 6/6			std erro cko	2.5504	6.99521	2.4944	3.66838	4.50191	0.301011	4.70178
									Rluc
	WT3 F-1	WT3 F-2	WT3 F-3	WT3 F-4	WT3 F-5	WT1 F-6			1	0.0719457	0.0895561	0.119305	0.0426823	0.0258125	1.3493		74.1124	5.33207	6.63722	8.84196	3.16329	1.91303			T-Test	0.0987381	0.554097	0.553132	0.987709	0.0576036	0.423054	0.0600588
	21.7206	26.3437		25.8121		32.3067			Ctip2 C2														100
	21.9025	26.4259	26.2429		26.9123	Undetermined		raw	1	0.043309	0.0434114	0.0627742	0.0250033	0.000694495	1.17519		85.0924	3.68527	3.69398	5.34161	2.1276	0.0590963			1 Tail T-test	0.0493691	0.277048	0.276566	0.493855	0.0288018	0.211527	0.0300294
		26.2526	26.4318	25.7984	27.3543	32.2999		norm.	1	0.601969	0.48474	0.526167	0.585802	0.0269053	3.22558		31.0022	18.6623	15.028	16.3123	18.1611	0.834123	100			*						*
Mean	21.8116	26.3407	26.3373	25.8052	27.1333	32.3033																	100
∆ CT	0	4.52919	4.52578	3.99368	5.32174	10.4917
fold change	1	0.043309	0.0434114	0.0627742	0.0250033	0.000694495		cko1	1	2	3	4	5	6	Total		% in 1/6	% in 2/6	% in 3/6	% in 4/6	% in 5/6	% in 6/6
									Rluc
									1	0.0368233	0.23675	0.20722	0.150083	0.127428	1.7583		56.873	2.09425	13.4647	11.7852	8.53567	7.2472	100
									Ctip2 C2
								raw	1	0.0489994	0.18604	0.150806	0.274419	0.00714618	1.66741		59.9732	2.93865	11.1574	9.04434	16.4578	0.428579	100
	CTs							norm.	1	1.33066	0.785807	0.727758	1.82845	0.0560802	5.72876		17.4558	23.2278	13.7169	12.7036	31.917	0.978924	100
	cko1 F-1	cko1 F-2	cko1 F-3	cko1 F-4	cko1 F-5	cko1 F-6
	22.9157		25.4955	25.7375	24.9427	29.7872		cko2	1	2	3	4	5	6	Total		% in 1/6	% in 2/6	% in 3/6	% in 4/6	% in 5/6	% in 6/6
		27.427		26.1376	24.8424				Rluc
	23.1383	27.3292	25.4112	25.3937		30.5241			1	0.0307299	0.262288	0.27532	0.181061	0.0812233	1.83062		54.6262	1.67866	14.3278	15.0397	9.8907	4.43692	100
Mean	23.027	27.3781	25.4533	25.7562	24.8926	30.1556			Ctip2 C2
∆ CT	0	4.35109	2.42632	2.72923	1.86555	7.12861		raw	1	0.0401002	0.178915	0.0867817	0.131774	0.00239839	1.43997		69.4459	2.78479	12.4249	6.02663	9.15118	0.166559	100
fold change	1	0.0489994	0.18604	0.150806	0.274419	0.00714618		norm.	1	1.30493	0.682131	0.315203	0.727788	0.0295284	4.05958		24.6331	32.1444	16.803	7.76444	17.9277	0.727377	100
	cko2 CxB-1	cko2 CxB-2	cko2 CxB-3	cko2 F-4	cko2 F-5	cko2 F-6		cko3	1	2	3	4	5	6	Total		% in 1/6	% in 2/6	% in 3/6	% in 4/6	% in 5/6	% in 6/6
	22.8619	27.526	25.2011		25.7889	31.568			Rluc
	22.8737		25.4784	26.4577		31.575			1	0.0516717	0.10935	0.0958282	0.0506822	0.02662	1.33415		74.954	3.873	8.19621	7.1827	3.79884	1.99527	100
		27.4901	25.372	26.3308	25.7944				Ctip2 C2
Mean	22.8678	17.1226	25.3505	26.3943	25.7917	31.5715		raw	1	0.0254662	0.146717	0.117735	0.094413	0.00277633	1.38711		72.0925	1.83592	10.5772	8.48781	6.80646	0.200152	100
∆ CT	0	3.47294	2.48265	3.52647	2.92386	8.70372		norm.	1	0.492846	1.34172	1.22861	1.86284	0.104295	6.03031		16.5829	8.17282	22.2496	20.3739	30.8913	1.72951	100
fold change	1	0.043309	0.178915	0.0867817	0.131774	0.00239839
	cko3 F-1	cko3 F-2	cko3 F-3	cko3 F-4	cko3 F-5	cko3 F-6
	23.233	28.5723	26.0118		26.7133
	23.3638		26.1229	26.3313	25.5664	32.3667
		28.6152		26.4384	27.8302	31.2154
Mean	23.2984	28.5937	26.0673	26.3848	26.7033	31.791
∆ CT	0	5.29527	2.76889	3.08638	3.40487	8.49261
fold change	1	0.0254662	0.146717	0.117735	0.094413	0.00277633
Rluc	CTs
	WT1 F-1	WT1 F-2	WT1 F-3	WT1 F-4	WT1 F-5	WT1 F-6
		23.9403		26.3971		22.0017
	19.8984	23.9245	23.976	26.2278	24.3398	21.9916
	20.0075		23.9164		24.9432	22.0321
Mean	19.9529	23.9324	23.9462	26.3124	24.6415	22.0085
∆ CT	0	3.97949	3.99325	6.35949	4.68858	2.05552
fold change	1	0.0633947	0.0627932	0.0121788	0.0387791	0.240561
	WT2 F-1	WT2 F-2	WT2 F-3	WT2 F-4	WT2 F-5	WT1 F-6
	20.3319		23.6202	22.6877	24.0623	27.5634
		24.9763		22.6923	23.9825
	20.3437	24.9731	23.545		24.1614	27.512
Mean	20.3378	24.9747	23.5826	22.69	24.0687	27.5377
∆ CT	0	4.63686	3.24478	2.3522	3.73091	7.19989
fold change	1	0.0401945	0.105493	0.195847	0.0753157	0.0068017
	WT3 F-1	WT3 F-2	WT3 F-3	WT3 F-4	WT3 F-5	WT1 F-6
	20.1071	23.8851	23.5776	23.16	24.6626
		23.9068	23.5826		24.6359	25.5326
	20.0909			23.1727		25.2171
Mean	20.099	23.896	23.5801	23.1663	24.6493	25.3748
∆ CT	0	3.79695	3.48106	3.06728	4.55022	5.27578
fold change	1	0.0719457	0.0895561	0.119305	0.0426823	0.0258125
	CTs
	cko1 F-1	cko1 F-2	cko1 F-3	cko1 F-4	cko1 F-5	cko1 F-6
	20.674	25.4273		22.9353	23.3772
	20.6334		22.6896	22.9135	23.2864	23.6315
		25.4065	22.7749		23.5059	23.6203
Mean	20.6537	25.4169	22.7322	22.9244	23.3898	23.6259
∆ CT	0	4.76324	2.07856	2.27076	2.73617	2.97225
fold change	1	0.0368233	0.23675	0.20722	0.150083	0.127428
	cko2 CxB-1	cko2 CxB-2	cko2 CxB-3	cko2 F-4	cko2 F-5	cko2 F-6
	20.9792	25.9219		22.8012		24.57
		25.9797	22.8999	22.8446	23.4436
	20.942	26.0528	22.8828	22.8185	23.4086	24.5951
Mean	20.9606	25.9848	22.8914	22.8214	23.4261	24.5826
∆ CT	0	5.02422	1.93077	1.86082	2.46545	3.62196
fold change	1	0.0307299	0.262288	0.27532	0.181061	0.0812233
	cko3 F-1	cko3 F-2	cko3 F-3	cko3 F-4	cko3 F-5	cko3 F-6
	20.0387	24.3649		23.452	24.3797	25.2854
	20.0588	24.2815	23.2372
			23.2463	23.4123	24.3225	25.2748
Mean	20.0488	24.3232	23.2417	23.4322	24.3511	25.2801
∆ CT	0	4.27448	3.19298	3.38341	4.30238	5.23135
fold change	1	0.0516717	0.10935	0.0958282	0.0506822	0.02662

## Sheet: Rorb R1
Rorb R1	CTs																									Normalized % Rorb R1
	WT1 F-1	WT1 F-2	WT1 F-3	WT1 F-4	WT1 F-5	WT1 F-6		WT1	1	2	3	4	5	6	Total		% in 1/6	% in 2/6	% in 3/6	% in 4/6	% in 5/6	% in 6/6				F1 (0r)	F2 (1r)	F3(2&3 r)	F4(4,5,6)	F5 (7-x)	F6(x-y)	New F5 (>7)
						34.2025			Rluc																wt1	32.8201	16.0538	23.4969	0.22279	25.5363	1.87021	27.4065
	27.6979	31.5401	31.6314	35.8587	31.9545	Undetermined			1	0.137048	0.107389	0.53412	0.0555	0.174575	2.00863		49.7851	6.82293	5.34638	26.5912	2.76307	8.69126			wt2	13.5764	5.33214	35.3827	4.00303	41.2813	0.424449	41.7057
	27.4045	31.3601	30.8733	35.4587	32.2146	Undetermined			Rorb R1														100		wt3	25.926	28.563	14.9368	7.21069	20.9617	2.40181	23.3635
Mean	27.5512	31.4501	31.2524	35.6587	32.0846	34.2025		raw	1	0.0670361	0.0768831	0.00362572	0.0431827	0.00994795	1.20068		83.2864	5.5832	6.40332	0.301973	3.59654	0.828529										0
∆ CT	0	3.89892	3.70119	8.10752	4.5334	6.65139		norm.	1	0.489144	0.71593	0.00678821	0.778068	0.0569837	3.04691		32.8201	16.0538	23.4969	0.22279	25.5363	1.87021	100		cko1	9.7067	57.5824	8.58251	14.3515	7.61741	2.15948	9.77689
fold change	1	0.0670361	0.0768831	0.00362572	0.0431827	0.00994795																	100		cko2	3.20206	31.6254	27.2127	26.0998	10.9141	0.945956	11.86
								WT2	1	2	3	4	5	6	Total		% in 1/6	% in 2/6	% in 3/6	% in 4/6	% in 5/6	% in 6/6			cko3	11.1588	6.4255	39.573	24.8856	17.4657	0.491446	17.9571
	WT2 F-1	WT2 F-2	WT2 F-3	WT2 F-4	WT2 F-5	WT1 F-6			Rluc
			30.5569		30.9547	37.002			1	0.260247	0.100697	1.0595	0.089577	0.108435	2.61846		38.1904	9.93893	3.84565	40.4629	3.42098	4.14119			Average wt Rorb R1/Rluc	24.1075	16.6496	24.6055	3.81217	29.2597	1.56549	30.8252
	28.6004	31.8049	30.7095	30.4614		Undetermined			Rorb R1														100		Average CKO Rorb R1/Rluc	8.0225	31.8778	25.1227	21.779	11.999	1.19896	13.198
	28.9907	32.3669	30.9101	30.4867	30.3891	Undetermined		raw	1	0.102212	0.262436	0.312397	0.272374	0.00339009	1.95281		51.2083	5.23411	13.4389	15.9973	13.9478	0.173601			stdevwt	9.74988	11.6269	10.2679	3.49786	10.6593	1.02329	9.6372
Mean	28.7955	32.0859	30.7255	30.4741	30.6719	37.002		norm.	1	0.392751	2.60619	0.294852	3.04067	0.0312637	7.36572		13.5764	5.33214	35.3827	4.00303	41.2813	0.424449	100		Stdev cko	4.23729	25.5794	15.6006	6.46094	5.01299	0.862319	4.25109
∆ CT	0	3.29036	1.92997	1.67855	1.87634	8.20645																	100		std error wt	5.6291	6.71279	5.92819	2.01949	6.15413	0.590799	5.56404
fold change	1	0.102212	0.262436	0.312397	0.272374	0.00338543		WT3	1	2	3	4	5	6	Total		% in 1/6	% in 2/6	% in 3/6	% in 4/6	% in 5/6	% in 6/6			std erro cko	2.4464	14.7683	9.00701	3.73022	2.89425	0.49786	2.45437
									Rluc
	WT3 F-1	WT3 F-2	WT3 F-3	WT3 F-4	WT3 F-5	WT1 F-6			1	0.0386125	0.113886	0.325796	0.0394533	0.0175296	1.53528		65.1348	2.51502	7.41796	21.2206	2.56978	1.14179			T-Test	0.0587575	0.401024	0.964039	0.0133097	0.0641129	0.659946	0.0441807
	27.2553	31.6888	30.8649	30.937	32.2246	36.36			Rorb R1														100
			31.4781	30.4746		36.6558		raw	1	0.0425399	0.0656137	0.0906122	0.0318987	0.00162396	1.23229		81.1498	3.4521	5.32454	7.35317	2.58858	0.131784				0.0293788	0.200512	0.482019	0.00665487	0.0320565	0.329973	0.0220904
	27.228	31.9046			32.1995	Undetermined		norm.	1	1.10171	0.576133	0.278126	0.808519	0.0926411	3.85713		25.926	28.563	14.9368	7.21069	20.9617	2.40181	100			*			**			*
Mean	27.2417	31.7967	31.1715	30.7058	32.212	36.5079																	100
∆ CT	0	4.55504	3.92986	3.46415	4.97036	9.26627
fold change	1	0.0425399	0.0656137	0.0906122	0.0318987	0.00162396		cko1	1	2	3	4	5	6	Total		% in 1/6	% in 2/6	% in 3/6	% in 4/6	% in 5/6	% in 6/6
									Rluc
									1	0.030106	0.60248	0.21083	0.279333	0.0756169	2.19837		45.4883	1.36947	27.4058	9.59032	12.7064	3.43969	100
									Rorb R1
								raw	1	0.178595	0.532704	0.311717	0.219209	0.0168227	2.25905		44.2665	7.90578	23.5809	13.7986	9.7036	0.744683	100
	CTs							norm.	1	5.93223	0.884184	1.47852	0.784758	0.222473	10.3022		9.7067	57.5824	8.58251	14.3515	7.61741	2.15948	100
	cko1 F-1	cko1 F-2	cko1 F-3	cko1 F-4	cko1 F-5	cko1 F-6
			29.5033	30.1001				cko2	1	2	3	4	5	6	Total		% in 1/6	% in 2/6	% in 3/6	% in 4/6	% in 5/6	% in 6/6
	28.3227	30.9922	29.1213		30.5155	34.4278			Rluc
	28.5411	30.842	29.3968	30.1271	30.7275	34.2228			1	0.0223597	0.153284	0.103642	0.258532	0.0534221	1.59124		62.8441	1.40518	9.63298	6.51329	16.2472	3.35726	100
Mean	28.4319	30.9171	29.3405	30.1136	30.6215	34.3253			Rorb R1
∆ CT	0	2.48523	0.908595	1.68169	2.18962	5.89344		raw	1	0.220838	1.30268	0.84478	0.881193	0.015782	4.26528		23.4451	5.17757	30.5416	19.806	20.6597	0.370012	100
fold change	1	0.178595	0.532704	0.311717	0.219209	0.0168227		norm.	1	9.8766	8.49851	8.15095	3.40845	0.295421	31.2299		3.20206	31.6254	27.2127	26.0998	10.9141	0.945956	100
	cko2 CxB-1	cko2 CxB-2	cko2 CxB-3	cko2 F-4	cko2 F-5	cko2 F-6		cko3	1	2	3	4	5	6	Total		% in 1/6	% in 2/6	% in 3/6	% in 4/6	% in 5/6	% in 6/6
			28.2587	28.7127	28.7959	34.6887			Rluc
	28.6456	30.8954	28.3845	29.1802	28.9704	Undetermined			1	0.123747	0.241345	0.205504	0.158009	0.172354	1.90096		52.605	6.50971	12.696	10.8105	8.31207	9.06667	100
	28.7606	30.8687			28.8904	Undetermined			Rorb R1
Mean	28.7031	30.882	28.3216	28.9464	28.8856	34.6887		raw	1	0.0712567	0.855898	0.458302	0.247316	0.00759068	2.64036		37.8736	2.69874	32.4159	17.3575	9.36673	0.287486	100
∆ CT	0	2.17894	-0.381486	0.243352	0.18247	5.98557		norm.	1	0.575826	3.54636	2.23014	1.5652	0.0440413	8.96157		11.1588	6.4255	39.573	24.8856	17.4657	0.491446	100
fold change	1	0.220838	1.30268	0.84478	0.881193	0.015782
	cko3 F-1	cko3 F-2	cko3 F-3	cko3 F-4	cko3 F-5	cko3 F-6
				30.2032		Undetermined
	29.4932	33.0016	29.5203	30.8647	31.2844	36.4499
	29.3234	33.4367	29.7453	Undetermined	31.5633	Undetermined
Mean	29.4083	33.2191	29.6328	30.5339	31.4239	36.4499
∆ CT	0	3.81083	0.224489	1.12563	2.01557	7.04156
fold change	1	0.0712567	0.855898	0.458302	0.247316	0.00759068
Rluc	CTs
	WT1 F-1	WT1 F-2	WT1 F-3	WT1 F-4	WT1 F-5	WT1 F-6
	21.6849	24.5062	24.9859	22.3599	25.7651	23.3783
	21.6271		24.7644			24.9892
		24.5403		22.7617	25.8897	24.1549
Mean	21.656	24.5233	24.8751	22.5608	25.8274	24.1741											0
∆ CT	0	2.86725	3.21908	0.904764	4.17137	2.51808
fold change	1	0.137048	0.107389	0.53412	0.0555	0.174575
	WT2 F-1	WT2 F-2	WT2 F-3	WT2 F-4	WT2 F-5	WT1 F-6
	22.296		25.3671	21.2076	25.4066
	21.9483	24.3614		22.8173		25.5933
		23.767	25.501	22.0914	25.7991	25.0613
Mean	22.1222	24.0642	25.4341	22.0388	25.6029	25.3273
∆ CT	0	1.94205	3.31191	-0.0833883	3.48073	3.20509
fold change	1	0.260247	0.100697	1.0595	0.089577	0.108435
	WT3 F-1	WT3 F-2	WT3 F-3	WT3 F-4	WT3 F-5	WT1 F-6
					24.8909	25.898
	20.159	24.8896	23.1779	21.7433	24.6592	25.9929
	20.0637	24.7227	23.3135	21.7153
Mean	20.1114	24.8061	23.2457	21.7293	24.7751	25.9454
∆ CT	0	4.69479	3.13433	1.61796	4.66371	5.83406
fold change	1	0.0386125	0.113886	0.325796	0.0394533	0.0175296
	CTs
	cko1 F-1	cko1 F-2	cko1 F-3	cko1 F-4	cko1 F-5	cko1 F-6
	21.3	26.2683	21.9053		22.6952	24.8515
	21.3398		22.1965	23.5663		25.0638
		26.4791		23.5651	23.6244	25.2197
Mean	21.3199	26.3737	22.0509	23.5657	23.1598	25.045
∆ CT	0	5.05381	0.731014	2.24585	1.83994	3.72515
fold change	1	0.030106	0.60248	0.21083	0.279333	0.0756169
	cko2 CxB-1	cko2 CxB-2	cko2 CxB-3	cko2 F-4	cko2 F-5	cko2 F-6
	19.7683	25.2523	22.4547	22.714	21.9762	24.0627
	20.1601	25.4391	22.8852		21.8555	24.3186
		25.6502		23.755
Mean	19.9642	25.4472	22.67	23.2345	21.9158	24.1906
∆ CT	0	5.48295	2.70572	3.27032	1.95159	4.22642
fold change	1	0.0223597	0.153284	0.103642	0.258532	0.0534221
	cko3 F-1	cko3 F-2	cko3 F-3	cko3 F-4	cko3 F-5	cko3 F-6
	20.7387				23.5938
	20.9561	23.9207	22.9656	23.4195	23.6514	23.5935
	21.1873	24.0297	23.0575	23.0674		23.401
Mean	20.9607	23.9752	23.0115	23.2435	23.6226	23.4972
∆ CT	0	3.01454	2.05083	2.28276	2.66192	2.53656
fold change	1	0.123747	0.241345	0.205504	0.158009	0.172354

## Sheet: Fezf2
Fezf2	CTs																									Normalized % Fezf2
	WT1 F-1	WT1 F-2	WT1 F-3	WT1 F-4	WT1 F-5	WT1 F-6		WT1	1	2	3	4	5	6	Total		% in 1/6	% in 2/6	% in 3/6	% in 4/6	% in 5/6	% in 6/6				F1 (0r)	F2 (1r)	F3(2&3 r)	F4(4,5,6)	F5 (7-x)	F6(x-y)	New F4 (>4)
	23.3455		27.3776	31.1893	30.4277	32.4055			Rluc																wt1	27.3796	27.0988	26.9391	11.1012	7.24648	0.234758	18.5825
		27.1569	27.4679		31.2089				1	0.0763809	0.0606917	0.0125425	0.0214393	0.156941	1.328		75.3015	5.75159	4.57018	0.944466	1.61441	11.8179			wt2	29.3103	32.4314	22.2216	8.90446	6.90094	0.231284	16.0367
	23.3684	27.008		30.7634		33.3834			Fezf2														100		wt3	19.5463	31.4328	24.2552	15.5556	8.38485	0.825236	24.7657
Mean	23.357	27.0825	27.4227	30.9764	30.8183	32.8944		raw	1	0.0755976	0.0597153	0.00508542	0.00567428	0.00134564	1.14742		87.1522	6.5885	5.20432	0.443205	0.494526	0.117276
∆ CT	0	3.72552	4.06576	7.61942	7.46135	9.53749		norm.	1	0.989745	0.983912	0.405456	0.264667	0.00857419	3.65235		27.3796	27.0988	26.9391	11.1012	7.24648	0.234758	100		cko1	23.5436	40.4965	17.1504	14.3117	4.11304	0.384814	18.8095
fold change	1	0.0755976	0.0597153	0.00508542	0.00567428	0.00134564																	100		cko2	19.8774	40.0088	20.6259	14.6962	4.52889	0.262826	19.4879
								WT2	1	2	3	4	5	6	Total		% in 1/6	% in 2/6	% in 3/6	% in 4/6	% in 5/6	% in 6/6			cko3	26.3299	19.5068	26.0599	19.5622	7.35849	1.18266	28.1034
	WT2 F-1	WT2 F-2	WT2 F-3	WT2 F-4	WT2 F-5	WT1 F-6			Rluc																	Free	80 S	2&3				>4
	23.3061	26.9473	27.547		30.9109	32.8632			1	0.0710862	0.0710512	0.0144045	0.0209103	0.120905	1.29836		77.0204	5.47509	5.47239	1.10944	1.61052	9.31218			Average wt Fezf2/Rluc	25.4121	30.321	24.472	11.8538	7.51076	0.430426	19.7949
		27.0733	27.566	31.3876	31.1055				Fezf2														100		Average CKO Fezf2/Rluc	23.2503	33.3374	21.2787	16.19	5.33347	0.6101	22.1336
	23.3779			30.9687		33.8882		raw	1	0.0786559	0.0538675	0.00437608	0.00492322	0.000954051	1.14278		87.5062	6.88288	4.71374	0.382934	0.430812	0.0834853			stdevwt	5.17079	2.83481	2.36621	3.38883	0.776455	0.34192	4.48904
Mean	23.342	27.0103	27.5565	31.1782	31.0082	33.3757		norm.	1	1.10649	0.75815	0.3038	0.235444	0.00789088	3.41177		29.3103	32.4314	22.2216	8.90446	6.90094	0.231284	100		Stdev cko	3.23624	11.9801	4.49049	2.92672	1.766	0.499589	5.18109
∆ CT	0	3.6683	4.21444	7.83615	7.66618	10.0336																	100		std error wt	2.98536	1.63668	1.36613	1.95654	0.448286	0.197408	2.59175
fold change	1	0.0786559	0.0538675	0.00437608	0.00492322	0.000954051		WT3	1	2	3	4	5	6	Total		% in 1/6	% in 2/6	% in 3/6	% in 4/6	% in 5/6	% in 6/6			std erro cko	1.86844	6.9167	2.59259	1.68974	1.0196	0.288438	2.9913
									Rluc
	WT3 F-1	WT3 F-2	WT3 F-3	WT3 F-4	WT3 F-5	WT1 F-6			1	0.0703163	0.0933083	0.161158	0.0537425	0.0465813	1.42511		70.1702	4.93411	6.54746	11.3085	3.77112	3.26862			T-Test	0.572528	0.693118	0.33711	0.168783	0.122278	0.634308	0.586375
				26.3864	28.951				Fezf2														100
	23.6608	26.7137	26.5813	26.568		32.6084		raw	1	0.113077	0.115787	0.128255	0.0230541	0.00196664	1.38214		72.3516	8.18128	8.37739	9.27945	1.668	0.142289			1 Tail T-test	0.286264	0.346559	0.168555	0.0843913	0.061139	0.317154	0.293187
	23.5508	26.7872	26.8513	26.7519	29.1383	32.5833		norm.	1	1.60812	1.24091	0.795832	0.428973	0.0422195	5.11605		19.5463	31.4328	24.2552	15.5556	8.38485	0.825236	100
Mean	23.6058	26.7504	26.7163	26.5687	29.0447	32.5959																	100
∆ CT	0	3.14463	3.11045	2.96291	5.43883	8.99005
fold change	1	0.113077	0.115787	0.128255	0.0230541	0.00196664		cko1	1	2	3	4	5	6	Total		% in 1/6	% in 2/6	% in 3/6	% in 4/6	% in 5/6	% in 6/6
									Rluc
									1	0.0464119	0.282836	0.303603	0.223066	0.16815	2.02407		49.4055	2.293	13.9737	14.9996	11.0207	8.30754	100
									Fezf2
								raw	1	0.0798314	0.206032	0.184553	0.0389693	0.00274837	1.51213		66.1317	5.27938	13.6253	12.2048	2.57711	0.181754	100
	CTs							norm.	1	1.72006	0.728451	0.607878	0.174698	0.0163447	4.24743		23.5436	40.4965	17.1504	14.3117	4.11304	0.384814	100
	cko1 F-1	cko1 F-2	cko1 F-3	cko1 F-4	cko1 F-5	cko1 F-6
				26.707		32.7963		cko2	1	2	3	4	5	6	Total		% in 1/6	% in 2/6	% in 3/6	% in 4/6	% in 5/6	% in 6/6
	24.265	27.8447	26.4416	26.6539	28.934	32.7032			Rluc
	24.2201	27.9342	26.6017		28.9142				1	0.0299586	0.223808	0.214841	0.207691	0.0795812	1.75588		56.9515	1.70619	12.7462	12.2355	11.8283	4.53227	100
Mean	24.2425	27.8895	26.5216	26.6804	28.9241	32.7498			Fezf2
∆ CT	0	3.6469	2.27906	2.43789	4.68152	8.50721		raw	1	0.0603001	0.232236	0.158841	0.0473205	0.00105225	1.49975		66.6778	4.02068	15.485	10.5912	3.15523	0.0701619	100
fold change	1	0.0798314	0.206032	0.184553	0.0389693	0.00274837		norm.	1	2.01278	1.03766	0.739341	0.227841	0.0132224	5.03084		19.8774	40.0088	20.6259	14.6962	4.52889	0.262826	100
	cko2 CxB-1	cko2 CxB-2	cko2 CxB-3	cko2 F-4	cko2 F-5	cko2 F-6		cko3	1	2	3	4	5	6	Total		% in 1/6	% in 2/6	% in 3/6	% in 4/6	% in 5/6	% in 6/6
		28.1902	26.2701	26.8068		33.3824			Rluc
	24.1034	28.3099	26.3393	26.6852	28.5649				1	0.0462612	0.110845	0.105309	0.0433278	0.0236798	1.32942		75.2206	3.47979	8.33781	7.92139	3.25915	1.78121	100
	24.2933			27.066	28.6346	34.7988			Fezf2
Mean	24.1983	28.25	26.3047	26.8527	28.5997	34.0906		raw	1	0.0342732	0.109708	0.0782407	0.012109	0.00106363	1.23539		80.9458	2.77427	8.88041	6.33325	0.980169	0.086096	100
∆ CT	0	4.0517	2.10634	2.65435	4.40139	9.8923		norm.	1	0.740863	0.989745	0.742965	0.279473	0.044917	3.79796		26.3299	19.5068	26.0599	19.5622	7.35849	1.18266	100
fold change	1	0.0603001	0.232236	0.158841	0.0473205	0.00105225
	cko3 F-1	cko3 F-2	cko3 F-3	cko3 F-4	cko3 F-5	cko3 F-6
		29.0935	27.3035
	24.1046	28.9628		27.7734	30.4514	34.247
	24.2181		27.3958	27.9012	30.6069	33.8293
Mean	24.1614	29.0282	27.3496	27.8373	30.5292	34.0382
∆ CT	0	4.86678	3.18826	3.67594	6.36778	9.87679
fold change	1	0.0342732	0.109708	0.0782407	0.012109	0.00106363
Rluc	CTs
	WT1 F-1	WT1 F-2	WT1 F-3	WT1 F-4	WT1 F-5	WT1 F-6
	18.7176	22.5968	22.8983	25.1282	24.2937	21.4198
	18.7363	22.4268	22.7788	25.0024	24.29
	18.791	22.3532	22.6948			21.4201
Mean	18.7483	22.4589	22.7906	25.0653	24.2919	21.42
∆ CT	0	3.71064	4.04236	6.31704	5.5436	2.6717
fold change	1	0.0763809	0.0606917	0.0125425	0.0214393	0.156941
	WT2 F-1	WT2 F-2	WT2 F-3	WT2 F-4	WT2 F-5	WT1 F-6
	18.6315	22.4136		24.7519	24.2219	21.6779
		22.5169	22.4594	24.6469
	18.616	22.3836	22.4181	24.8245	24.1849	21.6657
Mean	18.6238	22.4381	22.4388	24.7411	24.2034	21.6718
∆ CT	0	3.81429	3.815	6.11734	5.57964	3.04805
fold change	1	0.0710862	0.0710512	0.0144045	0.0209103	0.120905
	WT3 F-1	WT3 F-2	WT3 F-3	WT3 F-4	WT3 F-5	WT1 F-6
	19.1322	22.819	22.5799	21.7712	23.3396	23.4104
		23.0365			23.3419	23.6745
	19.1079	22.9946	22.5038	21.7357	23.3319	23.5475
Mean	19.12	22.95	22.5419	21.7535	23.3378	23.5441
∆ CT	0	3.83	3.42185	2.63345	4.21779	4.42411
fold change	1	0.0703163	0.0933083	0.161158	0.0537425	0.0465813
	CTs
	cko1 F-1	cko1 F-2	cko1 F-3	cko1 F-4	cko1 F-5	cko1 F-6
		24.2843	21.6506	21.5465
	19.8093			21.5311	21.9701	22.3965
	19.8288	24.2125	21.6314		21.9969	22.3859
Mean	19.819	24.2484	21.641	21.5388	21.9835	22.3912
∆ CT	0	4.42936	1.82196	1.71974	2.16446	2.57218
fold change	1	0.0464119	0.282836	0.303603	0.223066	0.16815
	cko2 CxB-1	cko2 CxB-2	cko2 CxB-3	cko2 F-4	cko2 F-5	cko2 F-6
	19.5817	24.6498	21.7975	21.7594	21.9035	23.2488
		24.6471	21.7204			23.2292
	19.5933		21.7237	21.853	21.8066
Mean	19.5875	24.6484	21.7472	21.8062	21.855	23.239
∆ CT	0	5.06089	2.15967	2.21866	2.26749	3.65143
fold change	1	0.0299586	0.223808	0.214841	0.207691	0.0795812
	cko3 F-1	cko3 F-2	cko3 F-3	cko3 F-4	cko3 F-5	cko3 F-6
		23.2198			23.3604	24.0773
	18.7263	23.1461	21.9301	21.9425	23.2164	24.1489
	18.6995	23.075	21.8425	21.9779	23.1476
Mean	18.7129	23.147	21.8863	21.9602	23.2415	24.1131
∆ CT	0	4.43405	3.17339	3.2473	4.52856	5.4002
fold change	1	0.0462612	0.110845	0.105309	0.0433278	0.0236798
