# Supplementary material for: Pum2 and TDP-43 refine area-specific cytoarchitecture post-mitotically and modulate translation of Sox5, Bcl11b, and Rorb mRNAs in developing mouse neocortex
Source: eLife. 2022 Mar 9;11:e55199. doi: 10.7554/eLife.55199 (PMC8906809; doi:10.7554/eLife.55199)
Supplement: Source data 18. — Quantification of expression of Sox5 splicing mRNA isoforms normalized to GAPDH mRNA in P0 somatosensory area-enriched cortical lysates of Pum2 cKO (Figure 9—figure supplement 1a) and TDP43A315T (Figure 9—figure supplement 1b) mutants and their respective control samples (Ctrl). For Sox5, 7 protein-coding isoforms were annotated. We designed primers recognizing three of them, and it was not possible to design specific qPCR primers to distinguish the other four isoforms for which we used a primer called Sox5 diff to detect the four of them simultaneously. Data are shown as means ± standard error of the mean (SEM) for at least n = 4 of each genotype. Pum2 cKO: Pum2fl/fl; Emx1Cre. Two-tailed t-test. [file elife-55199-data18.xlsx]

## Sheet: Pum2 CKO (a)
P0	CTs							P0 SA	Fold Change To GAPDH							Fold ChangePum2 CKO to ctrl								Fold Change ctrl to average ctrl
	ctrl1 GAPDH	ctrl1 sox5 diff	ctrl1 sox5 201	ctrl1 sox5 206	ctrl1 sox5 211				GAPDH	sox5 diff	sox5 201	sox5 206	sox5 211				GAPDH	sox5 diff	sox5 201	sox5 206	sox5 211				GAPDH	sox5 diff	sox5 201	sox5 206	sox5 211
	18.0233	21.7826	24.5944	33.5395	33.9828			ctrl1	1	0.0390332	0.00995831	2.40208e-05	1.1959e-05			Pum2 CKO1/ctrl	1	0.963225	1.30773	2.12357	1.83553			ctrl1/ctrl	1	1.04106	1.08874	0.628105	0.518968
	18.3796	23.2373	25.0966	30.9915	34.3036			ctrl2	1	0.0237418	0.00682489	6.3552e-05	3.88991e-05			Pum2 CKO2/ctrl	1	0.740178	0.678488	0.431689	0.464248			ctrl2/ctrl	1	0.633221	0.746166	1.66178	1.68805
	17.5822	23.0026	24.2437	35.4901	34.7533			ctrl3	1	0.0499034	0.0114252	3.1582e-05	1.47396e-05			Pum2 CKO3/ctrl	1	1.3364	1.60531	1.91771	0.637298			ctrl3/ctrl	1	1.33098	1.24912	0.825817	0.639633
Mean	17.995	22.6742	24.6449	33.3404	34.3466			ctrl4	1	0.0252572	0.00784661	3.01062e-05	2.77609e-05			Pum2 CKO 4/ctrl	1	0.657856	0.398102	0.574291	0.612688			ctrl4/ctrl	1	0.673639	0.857872	0.787228	1.2047
∆ CT	0	4.67916	6.64988	15.3454	16.3515			ctrl5	1	0.049533	0.009678	4.19556e-05	2.18606e-05			Pum2 CKO 5/ctrl	1	0.638776	0.699887	2.83656	0.872856			ctrl5/ctrl	1	1.3211	1.0581	1.09707	0.948652
fold change	1	0.0390332	0.00995831	2.40208e-05	1.1959e-05											Average	1	0.867287	0.937905	1.57677	0.884524			ctrl6/ctrl
								pum2 cko1	1	0.0361149	0.0119613	8.12124e-05	4.22977e-05			stdev	0	0.292193	0.499385	1.03905	0.551406			Average	1	1	1	1	1
	ctrl2 GAPDH	ctrl2 sox5 diff	ctrl2 sox5 201	ctrl2 s206	ctrl2 sox5 211			pum2 cko2	1	0.027752	0.00620586	1.65092e-05	1.06981e-05			std error	0	0.130673	0.223332	0.464677	0.246596			stdev	0	0.337409	0.198711	0.4066	0.46883
	19.3268		25.5088	32.5525	33.3801			pum2 cko3	1	0.0501066	0.0146832	7.33397e-05	1.46858e-05			T-test	#DIV/0!	0.524838	0.802666	0.281085	0.7305			std error	0	0.150894	0.0888661	0.181837	0.209667
	17.7001	23.9371			33.0213			pum2 cko4	1	0.0246655	0.00364128	2.19628e-05	1.41187e-05
	18.6257	23.9574	25.9829	32.4326				pum2 cko5	1	0.0239501	0.00640159	0.00010848	2.0114e-05
Mean	18.5508	23.9473	25.7458	32.4925	33.2007
∆ CT	0	5.39643	7.19498	13.9417	14.6499
fold change	1	0.0237418	0.00682489	6.3552e-05	3.88991e-05
	ctrl3 GAPDH	ctrl3 sox5 diff	ctrl3 sox5 201	ctrl3 s206	ctrl3 sox5 211
	18.1002	22.2415	24.3551	33.5109	34.1387
	18.4357	22.8861	24.8456	33.1971	34.3006
	17.9732	22.3557	24.6632	32.6527
Mean	18.1697	22.4944	24.6213	33.1202	34.2196
∆ CT	0	4.32472	6.45164	14.9505	16.0499
fold change	1	0.0499034	0.0114252	3.1582e-05	1.47396e-05
	ctrl4 GAPDH	ctrl4 sox5 diff	ctrl4 sox5 201	ctrl4 s206	ctrl4 sox5 211
			25.8449	32.5384	33.335					sox5 diff	sox5 201	sox5 206	sox5 211
	17.9424	23.3954	24.5106	33.615	33.2567			Average ctrl	1	0.0374937	0.0091466	3.82433e-05	2.30438e-05
	18.3761	23.5375	25.1035	33.3832				Average pum2 cko	1	0.0325178	0.00857864	6.03008e-05	2.03828e-05
Mean	18.1593	23.4664	25.153	33.1789	33.2959			STDEV ctrl	0	0.0126507	0.00181753	1.55497e-05	1.08036e-05
∆ CT	0	5.30716	6.99371	15.0196	15.1366			STDEV pum2 cko	0	0.0109554	0.00456768	3.97367e-05	1.27065e-05					GAPDH	sox5 diff	sox5 201	s206	sox5 211
fold change	1	0.0252572	0.00784661	3.01062e-05	2.77609e-05			STD Error ctrl	0	0.00565757	0.000812823	6.95405e-06	4.83153e-06				Average ctrl	1	1	1	1	1
								STD Error pum2 cko	0	0.0048994	0.00204273	1.77708e-05	5.68253e-06				Average pum2 cko/ctrl	1	0.867287	0.937905	1.57677	0.884524
	ctrl5 GAPDH	ctrl5 sox5 diff	ctrl5 sox5 201	ctrl5 s206	ctrl5 sox5 211			T-Test	#DIV/0!	0.524838	0.802666	0.281085	0.7305				std error ctrl	0	0.150894	0.0888661	0.181837	0.209667
	19.0182	23.5655	26.3549	Undetermined	34.6248												std error pum2 cko	0	0.130673	0.223332	0.464677	0.246596
	19.0852	23.6406	26.0922	32.9137	34.873
	19.6993		25.4289	34.703
Mean	19.2676	23.603	25.9587	33.8084	34.7489
∆ CT	0	4.33547	6.69108	14.5408	15.4813
fold change	1	0.049533	0.009678	4.19556e-05	2.18606e-05
P0	CTs
	pum2 cko1 GAPDH	pum2 cko1 sox5 diff	pum2 cko1 sox5 201	pum2 cko1 s206	pum2 cko1 sox5 211
	18.0862		24.4673	32.6221	32.5876
	18.3955	22.9462	24.6244	30.8333	32.8871
	17.9377	22.9159	24.484		32.5319
Mean	18.1398	22.931	24.5253	31.7277	32.6688
∆ CT	0	4.79126	6.38548	13.5879	14.5291
fold change	1	0.0361149	0.0119613	8.12124e-05	4.22977e-05
	pum2 cko2 GAPDH	pum2 cko2 sox5 diff	pum2 cko2 sox5 201	pum2 cko2 s206	pum2 cko2 sox5 211
	18.5623	22.5833	26.0979	34.8372	32.9604
	18.0266	23.9113	25.1542	33.5378	34.9804
	18.3143	23.9225	25.6477	Undetermined	36.4993
Mean	18.3011	23.4724	25.6333	34.1875	34.8134
∆ CT	0	5.17126	7.33215	15.8864	16.5123
fold change	1	0.027752	0.00620586	1.65092e-05	1.06981e-05
	pum2 cko3 GAPDH	pum2 cko3 sox5 diff	pum2 cko3 sox5 201	pum2 cko3 s206	pum2 cko3 sox5 211
	18.5728	23.1115	24.9259	32.5463	34.1988
	18.7552	23.2917	24.6384	32.2864	35.1782
	18.7158	22.5972	24.7486		34.8325
Mean	18.6813	23.0001	24.771	32.4163	34.7365
∆ CT	0	4.31886	6.08969	13.735	16.0552
fold change	1	0.0501066	0.0146832	7.33397e-05	1.46858e-05
	pum2 cko4 GAPDH	pum2 cko4 sox5 diff	pum2 cko4 sox5 201	pum2 cko4 s206	pum2 cko4 sox5 211
	19.7123	25.3939	28.2117	35.5075	36.7089
	19.9406	24.9543	28.1196	35.5702	36.596
	20.5399	25.8687			35.2241
Mean	20.0643	25.4056	28.1656	35.5389	36.1763
∆ CT	0	5.34136	8.10134	15.4746	16.112
fold change	1	0.0246655	0.00364128	2.19628e-05	1.41187e-05
	pum2 cko5 GAPDH	pum2 cko5 sox5 diff	pum2 cko5 sox5 201	pum2 cko5 s206	pum2 cko5 sox5 211
	18.8645		26.2281
	18.9162	24.478		31.883	34.7344
	19.2375	24.3017	26.3586	32.4696	34.4805
Mean	19.006	24.3898	26.2934	32.1763	34.6075
∆ CT	0	5.38382	7.28735	13.1703	15.6014
fold change	1	0.0239501	0.00640159	0.00010848	2.0114e-05

## Sheet: hTDP43 A315T (b)
P0	CTs			sox5 206-2				P0 SA	Fold Change To GAPDH							Fold Change hTDP43 A315T to wt								Fold Change Wt to average WT
	W1 GAPDH	W1 sox5diff	W1 sox5 201	W1 206	W1 sox5 211				GAPDH	sox5diff	sox5 201	sox5 206	sox5 211				GAPDH	sox5diff	sox5 201	sox5 206	sox5 211				GAPDH	sox5diff	sox5 201	sox5 206	sox5 211
	18.5896	22.3682	24.0222	36.7711	34.2499			W1	1	0.0518053	0.0109605	2.3779e-06	3.04206e-05			T1/WT	1	1.00681	1.03032	1.86524	0.658377			wt1/WT	1	1.27334	1.13403	0.0681575	0.861285
	18.3235	22.6924	25.3812		33.3781			w2	1	0.0333969	0.00785665	5.24372e-05	4.19835e-05			T2/WT	1	0.674513	0.692158	1.72996	0.540218			wt2/WT	1	0.820871	0.812891	1.503	1.18866
	18.1858	22.8506	25.2301	37.3253	32.4847			w3	1	0.0486595	0.0119691	3.31861e-05	5.42091e-05			T3/WT	1	1.05935	1.20139	1.45074	0.575581			wt3/WT	1	1.19601	1.23839	0.95121	1.5348
Mean	18.3663	22.6371	24.8778	37.0482	33.3709			w4	1	0.0444531	0.0120848	4.93643e-05	3.2503e-05			T4/WT	1	1.16275	1.03536	0.392206	0.957953			wt4/WT	1	1.09263	1.25036	1.41493	0.920243
∆ CT	0	4.27076	6.51155	18.6819	15.0046			w5	1	0.0297528	0.00878865	6.9018e-05	3.13331e-05			Average	1	0.975855	0.989807	1.35954	0.683032			WT5/WT	1	0.731301	0.90932	1.97826	0.887119
fold change	1	0.0518053	0.0109605	2.3779e-06	3.04206e-05			w6	1	0.0360407	0.0063307	2.94599e-06	2.14707e-05			stdev	0	0.208678	0.259147	0.211371	0.0606455			WT6/WT	1	0.885854	0.655008	0.0844408	0.607891
								315t1	1	0.0409617	0.00995811	6.50748e-05	2.32539e-05			std error	0	0.104339	0.129573	0.105686	0.0303228			Average	1	1	1	1	1
	W2 GAPDH	W2 sox5diff	W2 sox5 201	W2 sox5 206	W2 sox5 211			315t2	1	0.0274423	0.00668975	6.03554e-05	1.90805e-05			T-test	#DIV/0!	0.866722	0.947782	0.475495	0.116219			stdev	0	0.218645	0.244837	0.786274	0.320531
	19.0868	23.4625	25.8809	32.3033	33.0163			315t3	1	0.0430992	0.0116116	5.06139e-05	2.03295e-05											std error	0	0.0892616	0.0999545	0.320995	0.130856
	18.3484	23.9117	24.905	33.152				315t4	1	0.0473062	0.0100068	1.36834e-05	3.38349e-05
	18.6603	23.4337	26.2852	33.2973	33.4603
Mean	18.6985	23.6026	25.6904	32.9176	33.2383
∆ CT	0	4.90414	6.99187	14.2191	14.5398
fold change	1	0.0333969	0.00785665	5.24372e-05	4.19835e-05
	W3 GAPDH	W3 sox5diff	W3 sox5 201	W3 sox5 206	W3 sox5 211
	18.6978	22.4698	24.1846	31.7269	32.7259
	17.9471	22.9052	24.8224	33.5723	32.962
	18.2617	22.615	25.0532	34.2445	31.7319
Mean	18.3022	22.6633	24.6867	33.1813	32.4733
∆ CT	0	4.36114	6.38454	14.8791	14.1711
fold change	1	0.0486595	0.0119691	3.31861e-05	5.42091e-05
	w4 GAPDH	w4 sox5diff	w4 sox5 201	w4 sox5 206	w4 sox5 211
	18.6097	23.0391	24.734	31.6379	32.7098					sox5diff	sox5 201	sox5 206	sox5 211
	17.863	22.6024	23.988	33.4738	33.2282			Average WT	1	0.0406847	0.00966507	3.48882e-05	3.532e-05
	18.2764	22.5822	25.139		33.5383			Average315t	1	0.0397024	0.00956656	4.74319e-05	2.41247e-05
Mean	18.2497	22.7413	24.6203	32.5559	33.1587			STDEV WT	0	0.00889552	0.00236637	2.74317e-05	1.13211e-05
∆ CT	0	4.49157	6.37066	14.3062	14.9091			STDEV315t	0	0.00858781	0.00206601	2.32907e-05	6.70556e-06					GAPDH	sox5diff	sox5 201	sox5 206	sox5 211
fold change	1	0.0444531	0.0120848	4.93643e-05	3.2503e-05			STD Erro WT	0	0.00363158	0.000966067	1.11989e-05	4.62183e-06				Average wt	1	1	1	1	1
								STD Error315t	0	0.00429391	0.001033	1.16454e-05	3.35278e-06				Average 315T/WT	1	0.971327	0.987181	1.38032	0.685598
	w5 GAPDH	w5 sox5diff	w5 sox5 201	w5 sox5 206	w5 sox5 211			T-Test	#DIV/0!	0.866722	0.947782	0.475495	0.116219				std error wt	0	0.0721776	0.0829685	0.334741	0.114866
		22.8354	24.3622	Undetermined	32.8391												std error 315T	0	0.0609972	0.0871324	0.155763	0.0225618
	18.1005	23.0692	25.2113	Undetermined	33.2438
	18.0585	23.5463	25.1553	31.9022
Mean	18.0795	23.1503	24.9096	31.9022	33.0414
∆ CT	0	5.07083	6.83014	13.8227	14.962
fold change	1	0.0297528	0.00878865	6.9018e-05	3.13331e-05
	w6 GAPDH	w6 sox5diff	w6 sox5 201	w6 sox5 206	w6 sox5 211
		23.0042	25.9731	Undetermined	32.5793
	17.9157	22.7865	24.6327	37.2605	34.4071
	18.15	22.6906	25.403	35.5509	33.6339
Mean	18.0329	22.8271	25.3363	36.4057	33.5401
∆ CT	0	4.79423	7.30342	18.3728	15.5073
fold change	1	0.0360407	0.0063307	2.94599e-06	2.14707e-05
P0	CTs
	315t1 GAPDH	315t1 sox5diff	315t1 sox5 201	315t1 sox5 206	315T1 sox5 211
	18.3961	22.3091	24.5125	32.235	33.9695
	18.2499	23.1037	25.1795		33.9583
	18.2448	23.3068	25.1486	32.174	33.1395
Mean	18.2969	22.9065	24.9469	32.2045	33.6891
∆ CT	0	4.60958	6.64991	13.9075	15.3922
fold change	1	0.0409617	0.00995811	6.50748e-05	2.32539e-05
	315t2 GAPDH	315t2 sox5diff	315t2 sox5 201	315t2 sox5 206	315T2 sox5 211
		23.7112	25.655	32.3445	33.6842
	18.0206	23.3348	24.7673	32.223	34.3132
	18.2132	22.8672	25.5999	31.8317	33.3859
Mean	18.1169	23.3044	25.3408	32.1331	33.7945
∆ CT	0	5.18745	7.22383	14.0162	15.6775
fold change	1	0.0274423	0.00668975	6.03554e-05	1.90805e-05
	315t3 GAPDH	315t3 sox5diff	315t3 sox5 201	315t3 sox5 206	315t3 sox5 211
	17.6653	21.985	24.0861
	17.9571	22.2194	24.2524	31.3284	33.7353
	17.2884	22.315	23.8572	32.4857	32.7107
Mean	17.6369	22.1731	24.0652	31.907	33.223
∆ CT	0	4.5362	6.42829	14.2701	15.5861
fold change	1	0.0430992	0.0116116	5.06139e-05	2.03295e-05
	315T4 GAPDH	315T4 sox5diff	315T4 sox5 201	315T4 sox5 206	315T4 sox5 211
	19.0129	22.8313	25.4826	33.279	33.5355
	17.9632	23.1404	24.6184
	18.641	22.8508	25.4447	32.6295	33.2449
Mean	18.539	22.9409	25.1819	34.6962	33.3902
∆ CT	0	4.40183	6.64287	16.1572	14.8511
fold change	1	0.0473062	0.0100068	1.36834e-05	3.38349e-05
