# Supplementary material for: Pum2 and TDP-43 refine area-specific cytoarchitecture post-mitotically and modulate translation of Sox5, Bcl11b, and Rorb mRNAs in developing mouse neocortex
Source: eLife. 2022 Mar 9;11:e55199. doi: 10.7554/eLife.55199 (PMC8906809; doi:10.7554/eLife.55199)
Supplement: Source data 19. — Quantification of expression of Bcl11b and Rorb splicing mRNA isoforms normalized to GAPDH mRNA is shown in P0 somatosensory area enriched cortical lysates of Pum2 cKO (Figure 9—figure supplement 1a) and TDP43 A315T (Figure 9—figure supplement 1b) mutants and their respective control samples (Ctrl). Data are shown as means ± standard error of the mean (SEM) for at least n = 4 of each genotype. Pum2 cKO: Pum2fl/fl; Emx1Cre. Two-tailed t-test. [file elife-55199-data19.xlsx]

## Sheet: Pum2 CKO (a)
P0	CTs									P0 SA	Fold Change To GAPDH									Fold ChangePum2 CKO to ctrl										Fold Change ctrl to average ctrl
	ctrl1 GAPDH	ctrl1 ctip2 201	ctrl1 ctip2 202	ctrl1 ctip2 203	ctrl1 Rorb 201	ctrl rorb 202	ctrl1 rorb 203				GAPDH	ctip2 201	ctip2 202	ctip2 203	rorb 201	rorb 202	rorb 203				GAPDH	ctip2 201	ctip2 202	ctip2 203	rorb 201	rorb 202	rorb 203				GAPDH	ctip2 201	ctip2 202	ctip2 203	rorb 201	rorb 202	rorb 203
	18.0233		26.646	22.7893	25.4736	29.9774	24.4415			ctrl1	1	0.0292399	0.00387614	0.0310613	0.0063037	0.000290421	0.0130433			Pum2 CKO1/ctrl	1	1.37007	1.29953	1.20063	0.887829	1.28791	1.09062			ctrl1/ctrl	1	1.5925	1.39982	1.26771	0.669632	1.45196	0.931579
	18.3796	23.3552	26.5111	23.6066	25.681	29.9246	24.3105			ctrl3	1	0.0194483	0.00413899	0.0304142	0.00634154	0.000390121	0.0101467			Pum2 CKO2/ctrl	1	0.862249	0.571447	0.786794	0.683168	0.492267	0.817769			ctrl3/ctrl	1	1.05922	1.49474	1.2413	0.673652	1.95041	0.724695
		23.2396	25.4808	23.2347	25.3785		24.634			ctrl5	1	0.0132005	0.00151632	0.0186278	0.013878	4.2841e-05	0.0155069			Pum2 CKO3/ctrl	1	1.73922	2.37499	2.05546	1.46935	3.59986	1.35962			ctrl5/ctrl	1	0.718943	0.547596	0.760261	1.47424	0.214183	1.10753
Mean	18.2015	23.2974	26.2126	23.2102	25.5111	29.951	24.462			ctrl6	1	0.0115554	0.00154471	0.0179041	0.0111315	7.66989e-05	0.0173084			Pum2 CKO 4/ctrl	1	0.918421	0.395868	0.939697	0.959256	0.381957	0.566431			ctrl6/ctrl	1	0.629343	0.557849	0.730723	1.18248	0.383455	1.23619
∆ CT	0	5.09592	8.01116	5.00874	7.30959	11.7496	6.26054			pum2 cko1	1	0.0251559	0.00359846	0.0294176	0.00835773	0.000257609	0.0152701			Pum2 CKO 5/ctrl	1	0.517347	0.518426	0.642459	0.915875	0.119456	0.680794			Average	1	1	1	1	1	1	1
fold change	1	0.0292399	0.00387614	0.0310613	0.0063037	0.000290421	0.0130433			pum2 cko2	1	0.0158318	0.00158236	0.0192779	0.00643112	9.84635e-05	0.0114499			Average	1	1.04073	1.03205	1.12501	0.983095	1.17629	0.903046			stdev	0	0.43625	0.51794	0.294325	0.397427	0.83769	0.22198
										pum2 cko3	1	0.0319339	0.00657645	0.0503626	0.013832	0.000720047	0.0190365			stdev	0	0.320658	0.830021	0.559697	0.291787	1.42319	0.321566			std error	0	0.218125	0.25897	0.147163	0.198714	0.418845	0.11099
	ctrl3 GAPDH	ctrl3 ctip2 201	ctrl3 ctip2 202	ctrl3 ctip2 203	ctrl3 Rorb 201	ctrl rorb 202	ctrl3 rorb 203			pum2 cko4	1	0.0168632	0.00109617	0.0230243	0.00903012	7.63994e-05	0.00793079			std error	0	0.143403	0.371197	0.250304	0.130491	0.636471	0.143809
	18.1002	23.5706	25.8457	22.98	25.1999	29.1216	24.521			pum2 cko5	1	0.00949902	0.00143554	0.0157414	0.00862175	2.38937e-05	0.00953203			T-test	#DIV/0!	0.848679	0.948457	0.70049	0.94317	0.833923	0.625511
			26.0297	23.0417	25.4908	29.5994	24.6087
	17.9732	23.8712	25.9842	23.2058	25.3222		24.8489
Mean	18.0367	23.7209	25.9532	23.0758	25.3376	29.3605	24.6595
∆ CT	0	5.68421	7.91651	5.03911	7.30095	11.3238	6.62285
fold change	1	0.0194483	0.00413899	0.0304142	0.00634154	0.000390121	0.0101467
	ctrl5 GAPDH	ctrl5 ctip2 201	ctrl5 ctip2 202	ctrl5 ctip2 203	ctrl5 Rorb 201	ctrl rorb 202	ctrl5 rorb 203
	19.0182	25.2902	28.4541	24.9738	25.3832	34.5593	25.2105
	19.0852	25.3451	28.8033	24.7237	25.2191	32.5655	25.0436																								q
		25.2497	27.9935	24.6969	25.0661	Undetermined	24.9339
Mean	19.0517	25.295	28.4169	24.7981	25.2228	33.5624	25.0627
∆ CT	0	6.24326	9.36521	5.7464	6.17106	14.5106	6.01094
fold change	1	0.0132005	0.00151632	0.0186278	0.013878	4.2841e-05	0.0155069
	ctrl6 GAPDH	ctlr6 ctip2 201	ctlr6 ctip2 202	ctlr6 ctip2 203	ctlr6 Rorb 201	ctrl rorb 202	ctlr6 rorb 203
	19.668		28.9553	25.5457	26.1901	33.4065	25.5903					ctip2 201	ctip2 202	ctip2 203	rorb 201	rorb 202	rorb 203
	19.6969	26.1195		25.5588	26.0634	33.2993	25.555			Average ctrl	1	0.018361	0.00276904	0.0245018	0.00941368	0.000200021	0.0140013
		26.116	29.0865	25.3536	26.2615	Undetermined	25.4593			Average pum2 cko	1	0.0198568	0.0028578	0.0275648	0.00925454	0.000235283	0.0126439
Mean	19.6825	26.1177	29.0209	25.486	26.1717	33.3529	25.5348			STDEV ctrl	0	0.00800999	0.0014342	0.00721151	0.00374125	0.000167555	0.00310801
∆ CT	0	6.43529	9.33845	5.80357	6.48921	13.6704	5.85239			STDEV pum2 cko	0	0.00875191	0.00229836	0.0137136	0.00274679	0.000284668	0.00450235					GAPDH	ctip2 201	ctip2 202	ctip2 203	rorb 201	rorb 202	rorb 203
fold change	1	0.0115554	0.00154471	0.0179041	0.0111315	7.66989e-05	0.0173084			STD Error ctrl	0	0.004005	0.000717098	0.00360576	0.00187063	8.37776e-05	0.00155401				Average ctrl	1	1	1	1	1	1	1
										STD Error pum2 cko	0	0.00391397	0.00102786	0.00613292	0.0012284	0.000127307	0.00201351				Average pum2 cko/ctrl	1	1.07451	1.16577	1.18619	1.13362	1.13632	1.31832
										T-Test	#DIV/0!	0.799294	0.948457	0.70049	0.94317	0.833923	0.625511				std error ctrl	0	0.218125	0.25897	0.147163	0.198714	0.418845	0.11099
																					std error pum2 cko	0	0.143403	0.371197	0.250304	0.130491	0.636471	0.143809
P0	CTs
	pum2 cko1 GAPDH	pum2 cko1 ctip2 201	pum2 cko1 ctip2 202	pum2 cko1 ctip2 203	pum2 cko1 Rorb 201	pum2 cko rorb 202	pum2 cko1 rorb 203
	18.0862	23.4961	26.2069	23.0423	24.9981	29.9855	24.1478
	18.3955	23.1336		23.2734	25.0694	30.1201	24.1981
	17.9377	23.7286	26.3095	23.3652	25.0599	30.0814
Mean	18.1398	23.4527	26.2582	23.227	25.0425	30.0623	24.1729
∆ CT	0	5.31296	8.11841	5.08718	6.90267	11.9225	6.03314
fold change	1	0.0251559	0.00359846	0.0294176	0.00835773	0.000257609	0.0152701
	pum2 cko2 GAPDH	pum2 cko2 ctip2 201	pum2 cko2 ctip2 202	pum2 cko2 ctip2 203	pum2 cko2 Rorb 201	pum2 cko rorb 202	pum2 cko2 rorb 203
	18.5623	24.2351	27.8326	23.8798	25.7064		24.757
	18.0266	24.3292	27.477	24.0554	25.5626	31.6295	24.8039
	18.3143		27.5049	24.0588	25.4764	31.5928	24.6879
Mean	18.3011	24.2821	27.6048	23.998	25.5818	31.6112	24.7496
∆ CT	0	5.98103	9.30371	5.69691	7.28071	13.3101	6.44853
fold change	1	0.0158318	0.00158236	0.0192779	0.00643112	9.84635e-05	0.0114499
	pum2 cko3 GAPDH	pum2 cko3 ctip2 201	pum2 cko3 ctip2 202	pum2 cko3 ctip2 203	pum2 cko3 Rorb 201	pum2 cko rorb 202	pum2 cko3 rorb 203
		23.5949	25.9565	23.1755	25.0854	29.2256	24.6647
	18.7552	23.8515	26.0115	23.0387	24.9399	29.0763	24.4388
	18.7158	23.6664		22.9268	24.7087	29.2234	24.2483
Mean	18.7355	23.7043	25.984	23.047	24.9113	29.1751	24.4506
∆ CT	0	4.96877	7.24848	4.3115	6.17585	10.4396	5.71509
fold change	1	0.0319339	0.00657645	0.0503626	0.013832	0.000720047	0.0190365
	pum2 cko4 GAPDH	pum2 cko4 ctip2 201	pum2 cko4 ctip2 202	pum2 cko4 ctip2 203	pum2 cko4 Rorb 201	pum2 cko rorb 202	pum2 cko4 rorb 203
	19.7123	25.5972	30.8063	25.389	26.9185	33.6104	26.8234
	19.9406	25.6886	29.3341	25.1453			26.6869
		25.8635	28.8389		26.3165	33.3946	26.904
Mean	19.8265	25.7164	29.6598	25.2672	26.6175	33.5025	26.8048
∆ CT	0	5.88998	9.83331	5.4407	6.79104	13.6761	6.97832
fold change	1	0.0168632	0.00109617	0.0230243	0.00903012	7.63994e-05	0.00793079
	pum2 cko5 GAPDH	pum2 cko5 ctip2 201	pum2 cko5 ctip2 202	pum2 cko5 ctip2 203	pum2 cko5 Rorb 201	pum2 cko rorb 202	pum2 cko5 rorb 203
	18.8645	25.8391	28.2759	24.9992	25.8131	34.2403	25.5449
	18.9162		28.4381	24.7936	25.6364	Undetermined	25.5617
		25.3776	28.2895	24.8459	25.7948	34.2463	25.7033
Mean	18.8903	25.6083	28.3345	24.8796	25.7481	34.2433	25.6033
∆ CT	0	6.71801	9.44419	5.98929	6.8578	15.353	6.713
fold change	1	0.00949902	0.00143554	0.0157414	0.00862175	2.38937e-05	0.00953203

## Sheet: hTDP43 A315T (b)
P0	CTs									P0 SA	Fold Change To GAPDH									Fold ChangeT to ctrl										Fold Change ctrl to average ctrl
	ctrl1 GAPDH	ctrl1 ctip2 201	ctrl1 ctip2 202	ctrl1 ctip2 203	ctrl1 Rorb 201	ctrl rorb 202	ctrl1 rorb 203				GAPDH	ctip2 201	ctip2 202	ctip2 203	rorb 201	rorb 202	rorb 203				GAPDH	ctip2 201	ctip2 202	ctip2 203	rorb 201	rorb 202	rorb 203				GAPDH	ctip2 201	ctip2 202	ctip2 203	rorb 201	rorb 202	rorb 203
	18.0233	22.2828	24.8862	21.9565	23.6929	28.9862	24.0301			ctrl1	1	0.0556387	0.0116412	0.073117	0.0221549	0.000548998	0.0172792			T1/ctrl	1	0.428649	0.273685	0.365851	0.530325	0.707857	0.683201			ctrl1/ctrl	1	1.18015	1.34701	1.36834	1.53881	1.29889	0.850572
	18.3796	22.4467	24.3111	22.0207	23.6835	29.0786				ctrl2	1	0.0448631	0.00866466	0.045812	0.0150726	0.000314495	0.0209355			T2/ctrl	1	0.315137	0.270003	0.313432	0.461715	0.829116	0.594594			ctrl2/ctrl	1	0.95159	1.0026	0.85734	1.0469	0.744075	1.03055
		22.3782	24.681	21.9481	23.7167		24.0824			ctrl3	1	0.0322393	0.00755904	0.0395111	0.00959408	0.000369807	0.0140105			T3/ctrl	1	1.00216	0.877216	1.12449	1.00999	1.11915	1.71795			ctrl3/ctrl	1	0.683826	0.874666	0.739423	0.666374	0.874939	0.689671
Mean	18.2015	22.3692	24.6261	21.9751	23.6977	29.0324	24.0563			ctrl4	1	0.0356804	0.00553858	0.0342964	0.00870026	0.000185152	0.0140642			T 4/ctrl	1	1.05855	0.993564	1.43959	1.53796	1.40836	2.36857			ctrl4/ctrl	1	0.756815	0.640877	0.641835	0.604292	0.438057	0.692316
∆ CT	0	4.16777	6.42462	3.77365	5.49623	10.8309	5.85482			ctrl5	1	0.0339778	0.00644074	0.0361878	0.0100658	0.000255275	0.0218548													ctrl5/ctrl	1	0.720702	0.745266	0.67723	0.699137	0.603965	1.07581
fold change	1	0.0556387	0.0116412	0.073117	0.0221549	0.000548998	0.0172792			ctrl6	1	0.0804735	0.012009	0.0916857	0.020797	0.00086227	0.0337445			Average	1	0.701124	0.603617	0.810841	0.885	1.01612	1.34108			ctrl6/ctrl	1	1.70692	1.38958	1.71584	1.44449	2.04007	1.66108
										T1	1	0.0202088	0.00236524	0.0195493	0.00763533	0.000299187	0.0138791			stdev	0	0.383669	0.386035	0.559504	0.498982	0.313296	0.853975			Average	1	1	1	1	1	1	1
	ctrl2 GAPDH	ctrl2 ctip2 201	ctrl2 ctip2 202	ctrl2 ctip2 203	ctrl2 Rorb 201	ctrl rorb 202	ctrl2 rorb 203			T2	1	0.0148573	0.00233342	0.0167483	0.00664752	0.000350439	0.012079			std error	0	0.171582	0.17264	0.250218	0.223152	0.14011	0.381909			stdev	0	0.392847	0.310407	0.440184	0.411946	0.587341	0.362494
	19.3268	23.4037	25.6119	23.4659		30.757	24.5513			T3	1	0.0472473	0.00758107	0.0600869	0.0145413	0.000473025	0.0348997			T-test	#DIV/0!	0.432349	0.109189	0.565071	0.700374	0.961575	0.40142			std error	0	0.160379	0.126723	0.179704	0.168176	0.239781	0.147988
		23.3187	25.8779	23.5236	25.0454	30.4648				T4	1	0.0499058	0.00858658	0.0769247	0.0221427	0.000595266	0.0481171
	18.6257	23.6413	25.9907	23.2836	25.0109		24.557
Mean	18.9762	23.4546	25.8269	23.4244	25.0282	30.6109	24.5541
∆ CT	0	4.47833	6.85064	4.44813	6.05193	11.6347	5.57791
fold change	1	0.0448631	0.00866466	0.045812	0.0150726	0.000314495	0.0209355
	ctrl3 GAPDH	ctrl3 ctip2 201	ctrl3 ctip2 202	ctrl3 ctip2 203	ctrl3 Rorb 201	ctrl rorb 202	ctrl3 rorb 203
	18.1002	23.163	25.2607	22.8538	24.901		24.3192
	18.4357	22.9792		22.847	24.8281	29.5504	24.3114
	17.9732	23.2321	25.1738	22.7931	24.8909	29.5909	24.3505
Mean	18.1697	23.1247	25.2173	22.8313	24.8733	29.5706	24.327
∆ CT	0	4.95504	7.04758	4.6616	6.70364	11.4009	6.15734
fold change	1	0.0322393	0.00755904	0.0395111	0.00959408	0.000369807	0.0140105
	ctrl4 GAPDH	ctrl4 ctip2 201	ctrl4 ctip2 202	ctrl4 ctip2 203	ctrl4 Rorb 201	ctrl rorb 202	ctrl4 rorb 203
		23.0593		22.9993	25.1871	30.5473	24.3156				GAPDH	ctip2 201	ctip2 202	ctip2 203	rorb 201	rorb 202	rorb 203
	17.9424	22.8986	25.7662	23.1928	24.9192	30.7334	24.4887			Average ctrl	1	0.0471455	0.0086422	0.053435	0.0143974	0.000422666	0.0203148
	18.3761	22.9461	25.5449	22.8831	24.9056	30.3941	24.129			Average T	1	0.0330548	0.00521658	0.0433273	0.0127417	0.000429479	0.0272437
Mean	18.1593	22.968	25.6555	23.0251	25.004	30.5583	24.3111			STDEV ctrl	0	0.018521	0.0026826	0.0235212	0.00593096	0.000248249	0.00736399
∆ CT	0	4.80873	7.49627	4.8658	6.84473	12.399	6.15182			STDEV T	0	0.0180882	0.00333619	0.0298971	0.00718406	0.00013242	0.0173483					GAPDH	ctip2 201	ctip2 202	ctip2 203	rorb 201	rorb 202	rorb 203
fold change	1	0.0356804	0.00553858	0.0342964	0.00870026	0.000185152	0.0140642			STD Error ctrl	0	0.00756115	0.00109517	0.0096025	0.0024213	0.000101347	0.00300634				Average ctrl	1	1	1	1	1	1	1
										STD Error T	0	0.00904412	0.0016681	0.0149485	0.00359203	6.62099e-05	0.00867416				Average T/ctrl	1	0.702155	0.591109	0.81721	0.907201	1.02532	1.35669
	ctrl5 GAPDH	ctrl5 ctip2 201	ctrl5 ctip2 202	ctrl5 ctip2 203	ctrl5 Rorb 201	ctrl rorb 202	ctrl5 rorb 203			T-Test	#DIV/0!	0.268548	0.109189	0.565071	0.700374	0.961575	0.40142				std error ctrl	0	0.156682	0.14806	0.183326	0.169366	0.24572	0.167599
	19.0182		26.3778	23.8065	25.7856	30.9051	24.4412														std error T	0	0.171834	0.169063	0.252183	0.22875	0.14138	0.386354
	19.0852	23.934		23.8403	25.6315	31.0696	24.584
		23.928	26.2827	23.8735	25.6413		24.6777
Mean	19.0517	23.931	26.3303	23.8401	25.6861	30.9874	24.5676
∆ CT	0	4.87926	7.27856	4.78835	6.6344	11.9357	5.51591
fold change	1	0.0339778	0.00644074	0.0361878	0.0100658	0.000255275	0.0218548
	ctrl6 GAPDH	ctlr6 ctip2 201	ctlr6 ctip2 202	ctlr6 ctip2 203	ctlr6 Rorb 201	ctrl rorb 202	ctlr6 rorb 203
	19.668		25.9851	23.0534	25.297	29.9534
	19.6969	23.2967	26.1392	23.22	25.2429	29.8199	24.5577
		23.3389		23.1154		29.8128	24.5856
Mean	19.6825	23.3178	26.0622	23.1296	25.2699	29.862	24.5717
∆ CT	0	3.63534	6.37974	3.44716	5.58748	10.1796	4.8892
fold change	1	0.0804735	0.012009	0.0916857	0.020797	0.00086227	0.0337445
P0	CTs
	T1 GAPDH	T1 ctip2 201	T1 ctip2 202	T1 ctip2 203	T1 Rorb 201	T rorb 202	T1 rorb 203
	18.0862	23.5386	26.4009	23.5808	25.0267	29.4455	24.1027
		23.7602	26.7692	23.6572	24.9434	29.7818	24.2465
	17.9377	23.6236	27.0371	23.828	25.1651	29.9285	24.1994
Mean	18.0119	23.6408	26.7357	23.6887	25.045	29.7186	24.1829
∆ CT	0	5.62887	8.7238	5.67674	7.03309	11.7067	6.17094
fold change	1	0.0202088	0.00236524	0.0195493	0.00763533	0.000299187	0.0138791
	T2 GAPDH	T2 ctip2 201	T2 ctip2 202	T2 ctip2 203	T2 Rorb 201	T rorb 202	T2 rorb 203
	18.5623	24.3393	27.0364	24.1823	25.5296	29.79	24.7753
	18.0266	24.5136	27.1727	24.2647		29.7693	24.6656
	18.3143	24.2684	26.9242	24.1558	25.5385		24.5764
Mean	18.3011	24.3738	27.0444	24.2009	25.5341	29.7797	24.6725
∆ CT	0	6.07268	8.74334	5.89985	7.23297	11.4785	6.37135
fold change	1	0.0148573	0.00233342	0.0167483	0.00664752	0.000350439	0.012079
	T3 GAPDH	T3 ctip2 201	T3 ctip2 202	T3 ctip2 203	T3 Rorb 201	T rorb 202	T3 rorb 203
		23.1362	25.1137	22.6095	24.8026	29.8388	23.5659
	18.7552	22.9305	26.4039	22.8457	24.9114		23.5253
	18.7158	23.3508	25.819	22.9217	24.8036	29.7238	23.6372
Mean	18.7355	23.1391	25.7789	22.7923	24.8392	29.7813	23.5761
∆ CT	0	4.40362	7.04338	4.05681	6.1037	11.0458	4.84064
fold change	1	0.0472473	0.00758107	0.0600869	0.0145413	0.000473025	0.0348997
	T4 GAPDH	T4 ctip2 201	T4 ctip2 202	T4 ctip2 203	T4 Rorb 201	T rorb 202	T4 rorb 203
	19.7123	24.2162	26.731	23.5117	25.2084	29.6036	24.274
	19.9406	24.3083	26.6493		25.3741	31.3974	24.2144
		23.9289		23.542	25.3879	30.6209	24.1229
Mean	19.8265	24.1511	26.6902	23.5269	25.3235	30.5406	24.2038
∆ CT	0	4.32465	6.8637	3.70041	5.49702	10.7142	4.37731
fold change	1	0.0499058	0.00858658	0.0769247	0.0221427	0.000595266	0.0481171
