# Supplementary material for: Pum2 and TDP-43 refine area-specific cytoarchitecture post-mitotically and modulate translation of Sox5, Bcl11b, and Rorb mRNAs in developing mouse neocortex
Source: eLife. 2022 Mar 9;11:e55199. doi: 10.7554/eLife.55199 (PMC8906809; doi:10.7554/eLife.55199)
Supplement: Source data 20. — Quantification of expression of Sox5 3′UTR mRNA isoforms normalized to GAPDH mRNA in P0 somatosensory area-enriched cortical lysates of Pum2 cKO (Figure 9—figure supplement 2a) and TDP43 A315T (Figure 9—figure supplement 2b) mutants and their respective control samples (Ctrl). Data are shown as means ± standard error of the mean (SEM) for at least n = 4 of each genotype. Pum2 cKO: Pum2fl/fl; Emx1Cre. Two-tailed t-test. [file elife-55199-data20.xlsx]

## Sheet: Pum2 CKO (a)
P0	CTs							P0 SA	Fold Change To GAPDH							Fold ChangePum2 CKO to ctrl								Fold Change ctrl to average ctrl
	ctrl1 GAPDH	ctrl1 S1	ctrl1 S2	ctrl1 S3	ctrl1 S4				GAPDH	S1	S2	S3	S4				GAPDH	S1	S2	S3	S4				GAPDH	S1	S2	S3	S4
	18.0233	22.9723	22.9715	23.9284				ctrl1	1	0.0263274	0.0332428	0.0235902	0.0221128			Pum2 CKO1/ctrl	1	1.04765	1.32106	1.30334	1.21197			ctrl1/ctrl	1	0.756665	1.09804	1.26587	1.19424
	18.3796	23.3196	22.7629	22.9493	23.8793			ctrl2	1	0.0482888	0.0193674	0.0118813	0.0209154			Pum2 CKO2/ctrl	1	1.26796	1.14538	0.983826	0.87432			ctrl2/ctrl	1	1.38785	0.639725	0.637566	1.12957
	17.5822	23.4351	22.9831	23.3243	23.1088			ctrl3	1	0.0298007	0.0350608	0.0187508	0.0203409			Pum2 CKO3/ctrl	1	1.06285	1.60102	1.61923	1.45165			ctrl3/ctrl	1	0.85649	1.15809	1.00619	1.09854
Mean	17.995	23.2423	22.9058	23.4007	23.494			ctrl4	1	0.0492365	0.0335307	0.0159166	0.0202921			Pum2 CKO 4/ctrl	1	0.446012	0.715209	0.644504	0.931616			ctrl4/ctrl	1	1.41509	1.10755	0.854105	1.09591
∆ CT	0	5.24729	4.91081	5.40567	5.49897			ctrl5	1	0.0231373	0.0278131	0.0262755	0.0141754			Pum2 CKO 5/ctrl	1	0.690113	0.902194	1.0633	1.08505			ctrl5/ctrl	1	0.664979	0.918694	1.40997	0.765563
fold change	1	0.0263274	0.0332428	0.0235902	0.0221128			ctrl6	1	0.0319731	0.032633	0.0153984	0.0132609			Average	1	0.902915	1.13697	1.12284	1.11092			ctrl6/ctrl	1	0.918928	1.0779	0.826295	0.716178
								pum2 cko1	1	0.0364518	0.0399945	0.0242883	0.0224412			stdev	0	0.329327	0.347241	0.364231	0.231898			Average	1	1	1	1	1
	ctrl2 GAPDH	ctrl2 S1	ctrl2 S2	ctrl2 S3	ctrl2 S4			pum2 cko2	1	0.0441172	0.0346759	0.0183341	0.0161891			std error	0	0.147279	0.155291	0.162889	0.103708			stdev	0	0.322907	0.194242	0.290387	0.204422
	19.3268	22.7989		24.94	24.0642			pum2 cko3	1	0.0369806	0.0484704	0.0301751	0.0268791			T-test	#DIV/0!	0.634394	0.428834	0.548341	0.420586			std error	0	0.131826	0.0792989	0.11855	0.0834549
	17.7001		24.1998	24.8135	24.1961			pum2 cko4	1	0.0155185	0.0216527	0.0120106	0.01725
	18.6257	23.0471	24.2824	25.0845				pum2 cko5	1	0.0240118	0.0273136	0.019815	0.0200911
Mean	18.5508	22.923	24.2411	24.946	24.1301
∆ CT	0	4.37217	5.69022	6.39516	5.57929
fold change	1	0.0482888	0.0193674	0.0118813	0.0209154
	ctrl3 GAPDH	ctrl3 S1	ctrl3 S2	ctrl3 S3	ctrl3 S4
	18.1002	23.4706	22.9921	24.1358	23.9447
	18.4357	23.0794	23.3534	23.681	23.7279
	17.9732	23.1646	22.6656	23.903	23.6949
Mean	18.1697	23.2382	23.0037	23.9066	23.7892
∆ CT	0	5.06851	4.834	5.73691	5.61947
fold change	1	0.0298007	0.0350608	0.0187508	0.0203409
	ctrl4 GAPDH	ctrl4 S1	ctrl4 S2	ctrl4 S3	ctrl4 S4
		22.3887	23.0725	23.9489	23.7737				GAPDH	S1	S2	S3	S4
	17.9424	22.7816	23.0428		23.7781			Average ctrl	1	0.034794	0.0302746	0.0186355	0.0185163
	18.3761	22.3399		24.3163	23.7948			Average pum2 cko	1	0.031416	0.0344214	0.0209246	0.0205701
Mean	18.1593	22.5034	23.0577	24.1326	23.7822			STDEV ctrl	0	0.0112352	0.0058806	0.0054115	0.00378513
∆ CT	0	4.34413	4.89838	5.97332	5.62294			STDEV pum2 cko	0	0.0114586	0.0105126	0.00678761	0.00429389					GAPDH	S1	S2	S3	S4
fold change	1	0.0492365	0.0335307	0.0159166	0.0202921			STD Error ctrl	0	0.00458676	0.00240074	0.00220924	0.00154527				Average ctrl	1	1	1	1	1
								STD Error pum2 cko	0	0.00512443	0.00470138	0.00303551	0.00192029				Average pum2 cko/ctrl	1	0.902915	1.13697	1.12284	1.11092
	ctrl5 GAPDH	ctrl5 S1	ctrl5 S2	ctrl5 S3	ctrl5 S4			T-Test	#DIV/0!	0.634394	0.428834	0.548341	0.420586				std error ctrl	0	0.131826	0.0792989	0.11855	0.0834549
	19.0182	24.3954		24.2948	25.2106												std error pum2 cko	0	0.147279	0.155291	0.162889	0.103708
	19.0852		24.1796	24.3089
		24.5753	24.2601		25.1738
Mean	19.0517	24.4854	24.2198	24.3019	25.1922
∆ CT	0	5.43364	5.16809	5.25014	6.14047
fold change	1	0.0231373	0.0278131	0.0262755	0.0141754
	ctrl6 GAPDH	ctrl6 S1	ctrl6 S2	ctrl6 S3	ctrl6 S4
	19.668	24.6406	24.7131		25.8811
	19.6969	24.9295	24.5745	25.7636
	19.9314	24.6272	24.8212	25.8094	26.1232
Mean	19.7654	24.7324	24.703	25.7865	26.0021
∆ CT	0	4.967	4.93753	6.02108	6.23667
fold change	1	0.0319731	0.032633	0.0153984	0.0132609
P0	CTs
	pum2 cko1 GAPDH	pum2 cko1 S1	pum2 cko1 S2	pum2 cko1 S3	pum2 cko1 S4
	18.0862	22.9822	22.8976	23.6152	24.0068
	18.3955	22.7102	22.8777	23.2278	23.6182
	17.9377	23.0605	22.5763	23.6671	23.2274
Mean	18.1398	22.9177	22.7838	23.5034	23.6175
∆ CT	0	4.77787	4.64406	5.3636	5.47771
fold change	1	0.0364518	0.0399945	0.0242883	0.0224412
	pum2 cko2 GAPDH	pum2 cko2 S1	pum2 cko2 S2	pum2 cko2 S3	pum2 cko2 S4
	18.5623	22.6452	23.1523	24.0272	24.285
	18.0266	22.962	23.2528		23.7228
	18.3143		23.0479	24.1137	24.7421
Mean	18.3011	22.8036	23.151	24.0704	24.2499
∆ CT	0	4.50252	4.84992	5.76933	5.94883
fold change	1	0.0441172	0.0346759	0.0183341	0.0161891
	pum2 cko3 GAPDH	pum2 cko3 S1	pum2 cko3 S2	pum2 cko3 S3	pum2 cko3 S4
	18.5728	23.3953	23.0988	23.4232	23.8102
	18.7552	23.3346		23.9452	23.987
	18.7158	23.5852	22.9972	23.8269
Mean	18.6813	23.4384	23.048	23.7318	23.8986
∆ CT	0	4.75709	4.36675	5.0505	5.21737
fold change	1	0.0369806	0.0484704	0.0301751	0.0268791
	pum2 cko4 GAPDH	pum2 cko4 S1	pum2 cko4 S2	pum2 cko4 S3	pum2 cko4 S4
	19.7123	25.4716	25.1545	26.1989
	19.9406	25.7687	25.5935		25.6414
		26.2686	25.3193	26.2131	25.726
Mean	19.8265	25.8363	25.3558	26.206	25.6837
∆ CT	0	6.00986	5.52931	6.37954	5.85726
fold change	1	0.0155185	0.0216527	0.0120106	0.01725
	pum2 cko5 GAPDH	pum2 cko5 S1	pum2 cko5 S2	pum2 cko5 S3	pum2 cko5 S4
	18.8645	24.4674	24.4166	24.2369	24.7434
	18.9162	24.3958	24.1173	25.0826
	19.2375	24.2952	24.0669	24.6703	24.5433
Mean	19.006	24.3861	24.2003	24.6633	24.6433
∆ CT	0	5.38011	5.19424	5.65726	5.6373
fold change	1	0.0240118	0.0273136	0.019815	0.0200911

## Sheet: hTDP43 A315T (b)
P0	CTs							P0 SA	Fold Change To GAPDH							Fold Change hTDP43 A315T to wt								Fold Change Wt to average WT
	W1 GAPDH	W1 s1	W1 s2	W1 s3	W1 s4				GAPDH	s1	s2	s3	s4				GAPDH	s1	s2	s3	s4				GAPDH	s1	s2	s3	s4
	18.5896	23.6806	22.8031	24.4185	24.0799			W1	1	0.0226483	0.037515	0.0158698	0.0224095			T1/WT	1	1.27268	1.46412	1.34694	1.02083			wt1/WT	1	0.704928	0.978808	0.874418	0.897777
	18.3235	23.8694	22.98		23.809			w2	1	0.0372162	0.0333655	0.0197113	0.0268556			T2/WT	1	1.03739	1.02605	0.980045	0.95827			wt2/WT	1	1.15836	0.870543	1.08608	1.0759
	18.1858	23.9422	23.525	24.2692	23.6493			w3	1	0.031258	0.0463413	0.0206163	0.028914			T3/WT	1	0.787695	1.00931	1.25862	1.03286			wt3/WT	1	0.972909	1.2091	1.13595	1.15836
Mean	18.3663	23.8308	23.1027	24.3439	23.846			w4	1	0.0397785	0.0389422	0.0158072	0.0269633			T4/WT	1	0.844327	1.12445	1.04402	0.638901			wt4/WT	1	1.23811	1.01605	0.870972	1.08021
∆ CT	0	5.46446	4.73639	5.97757	5.47975			w5	1	0.0309244	0.0433843	0.0225732	0.0203341			Average	1	0.985524	1.15598	1.15741	0.912715			WT5/WT	1	0.962525	1.13195	1.24378	0.814633
fold change	1	0.0226483	0.037515	0.0158698	0.0224095			w6	1	0.0309454	0.0304148	0.0143159	0.02429			stdev	0	0.242529	0.257888	0.191495	0.0400469			WT6/WT	1	0.963176	0.793557	0.788803	0.973113
								315t1	1	0.0408893	0.0561157	0.0244456	0.025481			std error	0	0.121265	0.128944	0.0957476	0.0200235			Average	1	1	1	1	1
	W2 GAPDH	W2 s1	W2 s2	W2 s3	W2 s4			315t2	1	0.0333298	0.0393257	0.0177868	0.0239195			T-test	#DIV/0!	0.913017	0.213341	0.207381	0.40103			stdev	0	0.185652	0.155703	0.18019	0.128692
	19.0868		23.6506	24.3363	23.5876			315t3	1	0.0253074	0.0386841	0.0228427	0.0257814											std error	0	0.075792	0.0635654	0.0735623	0.0525381
	18.3484	23.4896	23.7761	24.3904	24.2574			315t4	1	0.0271269	0.043097	0.0189479	0.0159477
	18.6603	23.4032	23.3853		23.9064
Mean	18.6985	23.4464	23.604	24.3633	23.9171
∆ CT	0	4.74793	4.9055	5.66484	5.21863
fold change	1	0.0372162	0.0333655	0.0197113	0.0268556
	W3 GAPDH	W3 s1	W3 s2	W3 s3	W3 s4
	18.6978	23.1468	22.6787	23.7288	23.4307
	17.9471	23.4356	22.4324		23.3979
	18.2617	23.3231	23.0902	24.0757
Mean	18.3022	23.3018	22.7338	23.9023	23.4143
∆ CT	0	4.99963	4.43156	5.60007	5.11209
fold change	1	0.031258	0.0463413	0.0206163	0.028914
	w4 GAPDH	w4 s1	w4 s2	w4 s3	w4 s4
	18.6097	22.5257	22.8867	24.1784	23.3381				GAPDH	s1	s2	s3	s4
	17.863	23.1885	23.0055	24.0948	23.6535			Average WT	1	0.0321284	0.0383272	0.018149	0.0249611
	18.2764	22.9905	22.9044	24.4257	23.396			Average315t	1	0.0316634	0.0443056	0.0210058	0.0227824
Mean	18.2497	22.9015	22.9322	24.233	23.4625			STDEV WT	0	0.00596471	0.00596765	0.00327026	0.00321228
∆ CT	0	4.65187	4.68252	5.98327	5.21286			STDEV315t	0	0.00704444	0.00811046	0.00315191	0.004629					GAPDH	s1	s2	s3	s4
fold change	1	0.0397785	0.0389422	0.0158072	0.0269633			STD Erro WT	0	0.00243508	0.00243628	0.00133508	0.00131141				Average wt	1	1	1	1	1
								STD Error315t	0	0.00352222	0.00405523	0.00157596	0.0023145				Average 315T/WT	1	0.985524	1.15598	1.15741	0.912715
	w5 GAPDH	w5 s1	w5 s2	w5 s3	w5 s4			T-Test	#DIV/0!	0.913017	0.213341	0.207381	0.40103				std error wt	0	0.075792	0.0635654	0.0735623	0.0525381
			22.539	23.6724	23.6914												std error 315T	0	0.121265	0.128944	0.0957476	0.0200235
	18.1005	23.1327	22.6733	23.425
	18.0585	23.0565			23.7075
Mean	18.0795	23.0946	22.6062	23.5487	23.6994
∆ CT	0	5.01511	4.52668	5.46924	5.61995
fold change	1	0.0309244	0.0433843	0.0225732	0.0203341
	w6 GAPDH	w6 s1	w6 s2	w6 s3	w6 s4
		22.9627	23.1057	24.1754	23.327
	17.9157	23.3731	23.3095	24.1279
	18.15	22.8052	22.8005	24.174	23.4657
Mean	18.0329	23.047	23.0719	24.1591	23.3963
∆ CT	0	5.01413	5.03908	6.12623	5.3635
fold change	1	0.0309454	0.0304148	0.0143159	0.02429
P0	CTs
	315t1 GAPDH	315t1 s1	315t1 s2	315t1 s3	315T1 s4
	18.3961		22.4007	23.7361	23.866
	18.2499	22.8855	22.5027		23.5288
	18.2448	22.9326	22.4538	23.5663	23.3793
Mean	18.2969	22.9091	22.4524	23.6512	23.5914
∆ CT	0	4.61213	4.15545	5.35428	5.29444
fold change	1	0.0408893	0.0561157	0.0244456	0.025481
	315t2 GAPDH	315t2 s1	315t2 s2	315t2 s3	315T2 s4
		23.1127	22.871	23.9828	23.5774
	18.0206	22.9766	22.9139	23.8771	23.4278
	18.2132	22.9827	22.571
Mean	18.1169	23.024	22.7853	23.93	23.5026
∆ CT	0	4.90704	4.66838	5.81305	5.38567
fold change	1	0.0333298	0.0393257	0.0177868	0.0239195
	315t3 GAPDH	315t3 s1	315t3 s2	315t3 s3	315t3 s4
	17.6653	23.3614	22.4526	23.2319
	17.9571	22.4705	22.341	22.9217	22.8771
	17.2884	22.9918	22.1935	23.1136	22.9518
Mean	17.6369	22.9412	22.329	23.089	22.9145
∆ CT	0	5.3043	4.69212	5.45212	5.27752
fold change	1	0.0253074	0.0386841	0.0228427	0.0257814
	315T4 GAPDH	315T4 s1	315T4 s2	315T4 s3	315T4 s4
	19.0129	23.5757	23.1059	24.1833
	17.9632	23.9106	23.2182	24.1312	24.7956
	18.641		22.9017	24.468	24.2235
Mean	18.539	23.7432	23.0753	24.2608	24.5095
∆ CT	0	5.20413	4.53627	5.72182	5.97051
fold change	1	0.0271269	0.043097	0.0189479	0.0159477
