# Supplementary material for: Pum2 and TDP-43 refine area-specific cytoarchitecture post-mitotically and modulate translation of Sox5, Bcl11b, and Rorb mRNAs in developing mouse neocortex
Source: eLife. 2022 Mar 9;11:e55199. doi: 10.7554/eLife.55199 (PMC8906809; doi:10.7554/eLife.55199)
Supplement: Source data 21. — Quantification of expression of Bcl11b and Rorb 3′UTR mRNA isoforms normalized to GAPDH mRNA is shown in P0 somatosensory area-enriched cortical lysates of Pum2 cKO (Figure 9—figure supplement 2a) and TDP43A315T (Figure 9—figure supplement 2b) mutants and their respective control samples (Ctrl). Data are shown as means ± standard error of the mean (SEM) for at least n = 4 of each genotype. Pum2 cKO: Pum2fl/fl; Emx1Cre. Two-tailed t-test. [file elife-55199-data21.xlsx]

## Sheet: Pum2 CKO (a)
P0	CTs							P0 SA	Fold Change To GAPDH							Fold ChangePum2 CKO to ctrl								Fold Change ctrl to average ctrl
	ctrl1 GAPDH	ctrl1 c1	ctrl1 c2	ctrl1 R1	ctrl1 R2				GAPDH	c1	c2	R1	R2				GAPDH	c1	c2	R1	R2				GAPDH	c1	c2	R1	R2
	18.0233	21.4976		24.5749	24.899			ctrl1	1	0.0888375	0.0449414	0.00917516	0.00899765			Pum2 CKO1/ctrl	1	1.31855	1.30034	0.878574	1.46852			ctrl1/ctrl	1	0.969581	1.08731	0.889244	0.985138
	18.3796	21.3266	22.3055	24.7288	24.8555			ctrl2	1	0.114063	0.0506366	0.0148733	0.00892291			Pum2 CKO2/ctrl	1	0.842995	1.31021	0.696755	0.854498			ctrl2/ctrl	1	1.24489	1.2251	1.4415	0.976956
	17.5822	21.639	22.6362	24.9855	24.6193			ctrl3	1	0.110971	0.0439731	0.0102849	0.0128188			Pum2 CKO3/ctrl	1	2.22938		1.32601	1.25355			ctrl3/ctrl	1	1.21115	1.06389	0.996802	1.40351
Mean	17.995	21.4877	22.4708	24.7631	24.7913			ctrl4	1	0.080061	0.0428821	0.0135501	0.00700886			Pum2 CKO 4/ctrl	1	0.482542	0.616244	0.623383	0.929064			ctrl4/ctrl	1	0.873793	1.03749	1.31325	0.767389
∆ CT	0	3.49269	4.47581	6.76805	6.79624			ctrl5	1	0.0376381	0.0291012	0.00303445	0.0058577			Pum2 CKO 5/ctrl	1	1.11738	1.19624	1.03148	1.00816			ctrl5/ctrl	1	0.410786	0.704075	0.294094	0.64135
fold change	1	0.0888375	0.0449414	0.00917516	0.00899765			ctrl6	1	0.118177	0.0364607	0.0109897	0.0111944			Average	1	1.09909	1.10576	0.911239	1.10276			ctrl6/ctrl	1	1.2898	0.882131	1.06511	1.22565
								pum2 cko1	1	0.120812	0.0537463	0.00906507	0.0134126			stdev	0	0.449798	0.33039	0.281256	0.25361			Average	1	1	1	1	1
	ctrl2 GAPDH	ctrl2 c1	ctrl2 c2	ctrl2 R1	ctrl2 R2			pum2 cko2	1	0.0772391	0.0541542	0.00718907	0.00780445			std error	0	0.201156	0.165195	0.125782	0.113418			stdev	0	0.332435	0.181795	0.401962	0.281862
	19.3268		22.7111		25.3693			pum2 cko3	1	0.204266		0.0136816	0.0114491			T-test	#DIV/0!	0.648372	0.527685	0.688049	0.544808			std error	0	0.135716	0.0742175	0.1641	0.11507
	17.7001	21.0153	23.0949	24.7856	25.1286			pum2 cko4	1	0.0442127	0.0254709	0.00643203	0.00848549
	18.6257	22.3506	22.7576	24.4583	25.5794			pum2 cko5	1	0.10238	0.0494435	0.0106427	0.00920788
Mean	18.5508	21.6829	22.8545	24.622	25.3591
∆ CT	0	3.1321	4.30368	6.07113	6.80827
fold change	1	0.114063	0.0506366	0.0148733	0.00892291
	ctrl3 GAPDH	ctrl3 c1	ctrl3 c2	ctrl3 R1	ctrl3 R2
	18.1002		22.6688	24.6646	24.3692
	18.4357	21.2017		24.7638	24.5892
	17.9732	21.4811	22.6851	24.8906	24.4075
Mean	18.1697	21.3414	22.6769	24.773	24.4553
∆ CT	0	3.17174	4.50723	6.60332	6.28559
fold change	1	0.110971	0.0439731	0.0102849	0.0128188
	ctrl4 GAPDH	ctrl4 c1	ctrl4 c2	ctrl4 R1	ctrl4 R2
		21.6259	22.5541	24.3412						c1	c2	R1	R2
	17.9424				25.2743			Average ctrl	1	0.0916246	0.0413325	0.0103179	0.00913338
	18.3761	21.9782	22.8514	24.3884	25.3575			Average pum2 cko	1	0.109782	0.0457037	0.00940211	0.0100719
Mean	18.1593	21.802	22.7028	24.3648	25.3159			STDEV ctrl	0	0.0304593	0.00751404	0.00414742	0.00257435
∆ CT	0	3.64276	4.54348	6.20556	7.1566			STDEV pum2 cko	0	0.0601291	0.0136559	0.00290199	0.00231632					GAPDH	c1	c2	R1	R2
fold change	1	0.080061	0.0428821	0.0135501	0.00700886			STD Error ctrl	0	0.0124349	0.00306759	0.00169318	0.00105098				Average ctrl	1	1	1	1	1
								STD Error pum2 cko	0	0.0268906	0.00682793	0.00129781	0.00103589				Average pum2 cko/ctrl	1	1.09909	1.10576	0.911239	1.10276
	ctrl5 GAPDH	ctrl5 c1	ctrl5 c2	ctrl5 R1	ctrl5 R2			T-Test	#DIV/0!	0.53138	0.527685	0.688049	0.544808				std error ctrl	0	0.135716	0.0742175	0.1641	0.11507
	19.0182	23.6198															std error pum2 cko	0	0.201156	0.165195	0.125782	0.113418
	19.0852	23.7198	24.1828	27.6425	26.5342
		24.0106	24.1262	27.1896	26.4001
Mean	19.0517	23.7834	24.1545	27.4161	26.4672
∆ CT	0	4.73166	5.10278	8.36435	7.41545
fold change	1	0.0376381	0.0291012	0.00303445	0.0058577
	ctrl6 GAPDH	ctrl6 c1	ctrl6 c2	ctrl6 R1	ctrl6 R2
	19.668	22.8344	24.5501	26.2818	26.3355
	19.6969		24.1449	26.5587	26.1576
	19.9314	22.8584	24.9339	25.9789
Mean	19.7654	22.8464	24.543	26.2731	26.2465
∆ CT	0	3.08097	4.77751	6.5077	6.48108
fold change	1	0.118177	0.0364607	0.0109897	0.0111944
P0	CTs
	pum2 cko1 GAPDH	pum2 cko1 c1	pum2 cko1 c2	pum2 cko1 R1	pum2 cko1 R2
	18.0862	20.9414	22.4878	25.2148
	18.3955	21.0994	22.0116	24.43	24.42
	17.9377	21.5261	22.573	25.131	24.3001
Mean	18.1398	21.189	22.3575	24.9253	24.3601
∆ CT	0	3.04917	4.21769	6.78547	6.22027
fold change	1	0.120812	0.0537463	0.00906507	0.0134126
	pum2 cko2 GAPDH	pum2 cko2 c1	pum2 cko2 c2	pum2 cko2 R1	pum2 cko2 R2
	18.5623	21.6341	22.4529	25.1284	25.071
	18.0266		22.4459	25.4403	25.49
	18.3143	22.3572	22.6248	25.6946	25.3468
Mean	18.3011	21.9956	22.5079	25.4211	25.3026
∆ CT	0	3.69453	4.20678	7.11998	7.00149
fold change	1	0.0772391	0.0541542	0.00718907	0.00780445
	pum2 cko3 GAPDH	pum2 cko3 c1	pum2 cko3 c2	pum2 cko3 R1	pum2 cko3 R2
	18.5728	21.5124	undetermined	24.7509	25.1369
	18.7552	21.0538	undetermined	25.0614	25.0928
	18.7158	20.3521	undetermined	24.8064	25.16
Mean	18.6813	20.9728	#DIV/0!	24.8729	25.1299
∆ CT	0	2.29148	#DIV/0!	6.19161	6.44862
fold change	1	0.204266	#DIV/0!	0.0136816	0.0114491
	pum2 cko4 GAPDH	pum2 cko4 c1	pum2 cko4 c2	pum2 cko4 R1	pum2 cko4 R2
	19.7123	24.3403	25.2083	26.309	26.6004
	19.9406	24.0599	25.0346	27.9109	26.5528
		24.5773		27.101	26.9685
Mean	19.8265	24.3258	25.1215	27.107	26.7072
∆ CT	0	4.49939	5.29501	7.28051	6.88079
fold change	1	0.0442127	0.0254709	0.00643203	0.00848549
	pum2 cko5 GAPDH	pum2 cko5 c1	pum2 cko5 c2	pum2 cko5 R1	pum2 cko5 R2
	18.8645	22.6364	23.1445	25.6306	26.057
	18.9162	22.3198	23.3298	25.5629	25.7922
	19.2375	21.9259	23.5579	25.4865	25.4576
Mean	19.006	22.294	23.3441	25.56	25.7689
∆ CT	0	3.28799	4.33808	6.55399	6.76291
fold change	1	0.10238	0.0494435	0.0106427	0.00920788

## Sheet: hTDP43 A315T (b)
P0	CTs							P0 SA	Fold Change To GAPDH							Fold Change hTDP43 A315T to wt								Fold Change Wt to average WT
	W1 GAPDH	W1 c1	W1 c2	W1 R1	W1 R2				GAPDH	c1	c2	R1	R2				GAPDH	c1	c2	R1	R2				GAPDH	c1	c2	R1	R2
	18.5896	21.2658	22.6522	24.3112	24.6671			W1	1	0.107526	0.0556658	0.016089	0.0141466			T1/WT	1	1.24805	1.03454	0.787348	1.33571			wt1/WT	1	1.04878	1.24596	1.2828	1.35017
	18.3235	21.7338	22.5485	24.2655	24.3131			w2	1	0.0930216	0.0388015	0.0168569	0.0116901			T2/WT	1	0.81397	1.12301	1.0001	0.974499			wt2/WT	1	0.907312	0.868486	1.34403	1.11572
	18.1858	21.751	22.3995	24.3955	24.549			w3	1	0.173557	0.0553579	0.010376	0.0124633			T3/WT	1	1.05485	1.03449	0.777451	0.718492			wt3/WT	1	1.69284	1.23907	0.827291	1.18952
Mean	18.3663	21.5835	22.5334	24.3241	24.5097			w4	1	0.103243	0.0594833	0.0130981	0.0111222			T4/WT	1	1.34716	1.40004	1.58765	1.40541			wt4/WT	1	1.00701	1.3314	1.04433	1.06153
∆ CT	0	3.21725	4.16706	5.95778	6.1434			w5	1	0.0663915	0.0330708	0.0094231	0.00587413			Average	1	1.058	1.14802	1.03814	1.10853			WT5/WT	1	0.647568	0.740218	0.751318	0.560638
fold change	1	0.107526	0.0556658	0.016089	0.0141466			w6	1	0.0714071	0.0256834	0.00940954	0.0075692			stdev	0	0.139187	0.0510924	0.125789	0.310098			WT6/WT	1	0.696489	0.574866	0.750237	0.722418
								315t1	1	0.127955	0.0462204	0.00987499	0.013995			std error	0	0.0695937	0.0255462	0.0628943	0.155049			Average	1	1	1	1	1
	W2 GAPDH	W2 c1	W2 c2	W2 R1	W2 R2			315t2	1	0.0834518	0.0501729	0.0125434	0.0102104			T-test	#DIV/0!	0.701827	0.420284	0.855419	0.599268			stdev	0	0.37613	0.314006	0.266214	0.2986
	19.0868	21.9702		24.6669	25.3132			315t3	1	0.108147	0.0462181	0.00975086	0.00752806											std error	0	0.153555	0.128192	0.108681	0.121903
	18.3484	22.2794	23.3344	24.4128	24.9394			315t4	1	0.138117	0.0625497	0.0199125	0.0147253
	18.6603		23.4381	24.6874	25.0986
Mean	18.6985	22.1248	23.3862	24.589	25.1171
∆ CT	0	3.42629	4.68774	5.89052	6.41857
fold change	1	0.0930216	0.0388015	0.0168569	0.0116901
	W3 GAPDH	W3 c1	W3 c2	W3 R1	W3 R2
	18.6978	20.0875	22.4156	25.6401	24.2046
	17.9471	20.7113	22.5389	24.0425	25.0588
	18.2617	21.6873		24.9957	24.6217
Mean	18.3022	20.8287	22.4773	24.8928	24.6284
∆ CT	0	2.52652	4.17507	6.59061	6.32617
fold change	1	0.173557	0.0553579	0.010376	0.0124633
	w4 GAPDH	w4 c1	w4 c2	w4 R1	w4 R2
	18.6097	21.6012	22.1012		24.7615					c1	c2	R1	R2
	17.863	21.4499	22.445	24.478	24.6682			Average WT	1	0.102524	0.0446771	0.0125421	0.0104776
	18.2764		22.417	24.5303	24.7906			Average315t	1	0.114418	0.0512903	0.0130204	0.0116147
Mean	18.2497	21.5256	22.3211	24.5042	24.7401			STDEV WT	0	0.0385625	0.0140289	0.00333888	0.0031286
∆ CT	0	3.27588	4.07137	6.2545	6.49041			STDEV315t	0	0.0241047	0.00773421	0.00477186	0.00336721					GAPDH	c1	c2	R1	R2
fold change	1	0.103243	0.0594833	0.0130981	0.0111222			STD Erro WT	0	0.0157431	0.00572727	0.00136309	0.00127725				Average wt	1	1	1	1	1
								STD Error315t	0	0.0120524	0.0038671	0.00238593	0.0016836				Average 315T/WT	1	1.058	1.14802	1.03814	1.10853
	w5 GAPDH	w5 c1	w5 c2	w5 R1	w5 R2			T-Test	#DIV/0!	0.601291	0.420284	0.855419	0.599268				std error wt	0	0.145811	0.0941597	0.110009	0.0827305
			23.3066	24.8763													std error 315T	0	0.0695937	0.0255462	0.0628943	0.155049
	18.1005	21.9955	22.7425	24.7419	25.5088
	18.0585	21.9892	22.9442		25.473
Mean	18.0795	21.9923	22.9978	24.8091	25.4909
∆ CT	0	3.91286	4.9183	6.72958	7.41141
fold change	1	0.0663915	0.0330708	0.0094231	0.00587413
	w6 GAPDH	w6 c1	w6 c2	w6 R1	w6 R2
		22.0326			25.0899
	17.9157	21.3744	23.2595	24.8508	25.1147
	18.15	22.1149	23.3723	24.6782	25.0309
Mean	18.0329	21.8406	23.3159	24.7645	25.0785
∆ CT	0	3.80779	5.28302	6.73166	7.04564
fold change	1	0.0714071	0.0256834	0.00940954	0.0075692
P0	CTs
	315t1 GAPDH	315t1 c1	315t1 c2	315t1 R1	315T1 R2
	18.3961	20.8704	23.1605	24.8611	24.2295
	18.2499	21.2962	22.4061	24.816	24.9507
	18.2448	21.6231	22.6302	25.1997	24.1875
Mean	18.2969	21.2632	22.7323	24.9589	24.4559
∆ CT	0	2.96629	4.43533	6.662	6.15895
fold change	1	0.127955	0.0462204	0.00987499	0.013995
	315t2 GAPDH	315t2 c1	315t2 c2	315t2 R1	315T2 R2
		22.2354	21.9849	24.2951	24.6874
	18.0206	20.876	22.6355	24.4513	24.3611
	18.2132	21.9881	22.6813	24.5553	25.1437
Mean	18.1169	21.6998	22.4339	24.4339	24.7307
∆ CT	0	3.58291	4.31695	6.31693	6.61382
fold change	1	0.0834518	0.0501729	0.0125434	0.0102104
	315t3 GAPDH	315t3 c1	315t3 c2	315t3 R1	315t3 R2
	17.6653	20.5858	22.7552	24.3268	24.4112
	17.9571	20.6711	21.816	23.7854	25.1494
	17.2884	21.2807	21.6458	24.8394	24.5106
Mean	17.6369	20.8459	22.0723	24.3172	24.6904
∆ CT	0	3.20893	4.4354	6.68025	7.05351
fold change	1	0.108147	0.0462181	0.00975086	0.00752806
	315T4 GAPDH	315T4 c1	315T4 c2	315T4 R1	315T4 R2
	19.0129	21.759	22.309	24.1694	24.7914
	17.9632	20.6551	22.6486	24.1673	24.3007
	18.641	21.7711	22.6561	24.2309	24.7816
Mean	18.539	21.3951	22.5379	24.1892	24.6246
∆ CT	0	2.85604	3.99885	5.65018	6.08556
fold change	1	0.138117	0.0625497	0.0199125	0.0147253
