# Supplementary material for: Pum2 and TDP-43 refine area-specific cytoarchitecture post-mitotically and modulate translation of Sox5, Bcl11b, and Rorb mRNAs in developing mouse neocortex
Source: eLife. 2022 Mar 9;11:e55199. doi: 10.7554/eLife.55199 (PMC8906809; doi:10.7554/eLife.55199)
Supplement: Source data 22. — Quantification of polysome/monosome (P/M) ratio from polysome profiles of E14.5 neocortices for controls (Ctrl), Pum2 cKO, and TDP43A315T for n = 3 of each genotype (Figure 9—figure supplement 3a). Two-tailed t-test. [file elife-55199-data22.xlsx]

## Sheet: hTDP43 A315T
	WT					A315T
		1	2	3			1	2	3
	P	7230	6030	2689		P	2729	3186	2909
	M	3013	3403	2558		M	2361	1618	2089
	ratio	2.3996	1.77197	1.05121		ratio	1.15587	1.9691	1.39253
						Normalized to WT
		WT	A315T			WT	A315T
	1	2.3996	1.15587		1	1.37835	0.663937
	2	1.77197	1.9691		2	1.01783	1.13106
	3	1.05121	1.39253		3	0.603823	0.79988
	Mean	1.74093	1.50583		Mean	1	0.86496
	SEM	0.318071	0.197182		SEM	0.182702	0.113263
	ttest		0.63503		ttest		0.63503

## Sheet: Pum2 CKO
	WT					Pum2 cKO
		1	2	3			1	2	3
	P	9948	3598	2422		P	3558	3017	2642
	M	6287	2547	2989		M	2933	2725	2099
	ratio	1.58231	1.41264	0.810304		ratio	1.21309	1.10716	1.25869
						Normalized to WT
		WT	Pum2 cKO			WT	Pum2 cKO
	1	1.58231	1.21309		1	1.24747	0.956381
	2	1.41264	1.10716		2	1.1137	0.872862
	3	0.810304	1.25869		3	0.63883	0.992333
	Mean	1.26842	1.19298		Mean	1	0.940525
	SEM	0.191253	0.0366495		SEM	0.15078	0.0288938
	ttest		0.767587		ttest		0.767587
