# Supplementary material for: Pum2 and TDP-43 refine area-specific cytoarchitecture post-mitotically and modulate translation of Sox5, Bcl11b, and Rorb mRNAs in developing mouse neocortex
Source: eLife. 2022 Mar 9;11:e55199. doi: 10.7554/eLife.55199 (PMC8906809; doi:10.7554/eLife.55199)
Supplement: Source data 23. — Quantification of polysome profiling from E13.5 neocortices of Pum2 cKO (Figure 9—figure supplement 3b). Histograms showing the distribution of the Sox5 and Bcl11b mRNAs at E13.5 across polysome gradient fractions for Pum2 cKO relative to controls. E13.5 is the peak time of birth for layer V neurons when no layer IV Rorβ+ neurons are born yet. Values were normalized to an RLuc mRNA spike-in control, which was added in an equal amount to the fractions prior to RNA preparation. Data are represented as means ± standard error of the mean (SEM). *p≤0.05 by two-tailed t-test. [file elife-55199-data23.xlsx]

## Sheet: Sox5
Sox5	CTs																									Normalized % Sox5
	WT1 F-1	WT1 F-2	WT1 F-3	WT1 F-4	WT1 F-5	WT1 F-6		WT1	1	2	3	4	5	6	Total		% in 1/6	% in 2/6	% in 3/6	% in 4/6	% in 5/6	% in 6/6				F1 (0 r)	F2 (1r)	F3 (2 &3 r)	F4 (4,5,6)	F5 (7-x)	F6 (x-y)	New F4 (>4 )
	28.4796	27.5296	26.474		24.931	27.5699			RLuc																wt1	0.603681	10.6303	8.13633	14.4218	57.2582	8.94963	80.6297
	28.1441	27.5563	26.4858	26.3303	24.8191	27.9305			1	0.0892116	0.237959	0.14918	0.106862	0.091721	1.67493		59.7039	5.32628	14.2071	8.9066	6.3801	5.4761			wt2	0.587641	12.3842	12.5288	6.8405	53.1688	14.49	74.4993
	27.9601		26.5801	26.392	24.8095	27.7533			Sox5														100		wt3	0.166858	5.99196	15.7537	9.89786	39.8969	28.2927	78.0874
Mean	28.1946	27.543	26.5133	26.3611	24.8532	27.7512		raw	1	1.57094	3.20718	3.56388	10.1357	1.35977	20.8375		4.79904	7.539	15.3914	17.1032	48.6418	6.5256
∆ CT	0	-0.651629	-1.68131	-1.83345	-3.34138	-0.443366		norm.	1	17.6091	13.4779	23.8899	94.8485	14.8251	165.65		0.603681	10.6303	8.13633	14.4218	57.2582	8.94963	100		cko1	0.860656	13.4448	9.06663	25.567	35.6358	15.4252	76.628
fold change	1	1.57094	3.20718	3.56388	10.1357	1.35977																	100		cko2	0.487706	21.5566	10.5001	12.2657	37.6349	17.555	67.4556
								WT2	1	2	3	4	5	6	Total		% in 1/6	% in 2/6	% in 3/6	% in 4/6	% in 5/6	% in 6/6			cko3	0.689291	18.5229	6.82216	12.6753	51.7281	9.56225	73.9657
	WT2 F-1	WT2 F-2	WT2 F-3	WT2 F-4	WT2 F-5	WT1 F-6			RLuc
	27.8329	26.9923	26.2637	26.4475	25.0698	26.6583			1	0.0807754	0.138506	0.229508	0.0753546	0.0870498	1.61119		62.0658	5.01339	8.59651	14.2446	4.67694	5.40281			Average wt	0.452727	9.66883	12.1396	10.3867	50.108	17.2441	77.7388
	27.6459	26.9876	26.2113	26.373	24.8876				Sox5														100		Average CKO	0.679218	17.8414	8.7963	16.836	41.6663	14.1808	72.6831
	27.7806	26.977	26.0978	26.1858	24.9939	26.6441		raw	1	1.7023	2.95303	2.67161	6.81797	2.14647	17.2914		5.78323	9.84479	17.0781	15.4506	39.4299	12.4135			stdev wt	0.247699	3.30282	3.82359	3.81424	9.07638	9.96132	3.08002
Mean	27.7531	26.9857	26.1909	26.3354	24.9838	26.6512		norm.	1	21.0745	21.3205	11.6406	90.4784	24.6579	170.172		0.587641	12.3842	12.5288	6.8405	53.1688	14.49	100		Stdev cko	0.186679	4.09864	1.85382	7.56401	8.77096	4.13913	4.71879
∆ CT	0	-0.767485	-1.5622	-1.41771	-2.76934	-1.10196																	100		std error wt	0.143009	1.90688	2.20755	2.20215	5.24025	5.75117	1.77825
fold change	1	1.7023	2.95303	2.67161	6.81797	2.14647		WT3	1	2	3	4	5	6	Total		% in 1/6	% in 2/6	% in 3/6	% in 4/6	% in 5/6	% in 6/6			std error cko	0.107779	2.36635	1.0703	4.36708	5.06392	2.38973	2.72439
									RLuc
	WT3 F-1	WT3 F-2	WT3 F-3	WT3 F-4	WT3 F-5	WT1 F-6			1	0.103588	0.0724095	0.215512	0.118168	0.229398	1.73908		57.5018	5.95648	4.16368	12.3924	6.79486	13.1908			T-Test	0.274619	0.0547039	0.244631	0.257726	0.311142	0.648584	0.195152
		24.6707	23.2419	22.8691	21.5773				Sox5														100
	26.5466	24.8494	24.1515	22.6984	21.898	21.4402		raw	1	3.71988	6.83646	12.784	28.2546	38.8971	91.492		1.09299	4.0658	7.47219	13.9728	30.8821	42.5142
	26.5696	24.4684	23.9611	23.078		21.1128		norm.	1	35.9105	94.4138	59.3189	239.106	169.561	599.311		0.166858	5.99196	15.7537	9.89786	39.8969	28.2927	100
Mean	26.5581	24.6628	23.7848	22.8818	21.7377	21.2765																	100
∆ CT	0	-1.89526	-2.77325	-3.67626	-4.82042	-5.28159
fold change	1	3.71988	6.83646	12.784	28.2546	38.8971
								cko1	1	2	3	4	5	6	Total		% in 1/6	% in 2/6	% in 3/6	% in 4/6	% in 5/6	% in 6/6
									RLuc
									1	0.138545	0.0448258	0.0845206	0.0679259	0.0322603	1.36808		73.0953	10.127	3.27655	6.17806	4.96506	2.35808
									Sox5														100
								raw	1	2.16428	0.472219	2.5108	2.8125	0.578189	9.53799		10.4844	22.6912	4.95094	26.3242	29.4873	6.06196
								norm.	1	15.6215	10.5346	29.7064	41.4054	17.9226	116.19		0.860656	13.4448	9.06663	25.567	35.6358	15.4252	100
	CTs																						100
	cko1 F-1	cko1 F-2	cko1 F-3	cko1 F-4	cko1 F-5	cko1 F-6		cko2	1	2	3	4	5	6	Total		% in 1/6	% in 2/6	% in 3/6	% in 4/6	% in 5/6	% in 6/6
	29.6332	28.4775	30.9679	28.3759	28.4577	30.4407			RLuc
	29.5948	28.5228	30.7005	28.1959	28.1108	30.5443			1	0.0251967	0.100829	0.108042	0.12454	0.0435483	1.40216		71.3188	1.79699	7.19101	7.70541	8.88201	3.10581
			30.4211		27.798	30.2283			Sox5														100
Mean	29.614	28.5001	30.6965	28.2859	28.1222	30.4044		raw	1	1.11369	2.17081	2.71723	9.61035	1.56752	18.1796		5.50067	6.12605	11.9409	14.9466	52.8634	8.62243
∆ CT	0	-1.11389	1.08247	-1.32815	-1.49185	0.790387		norm.	1	44.2	21.5296	25.1498	77.1671	35.995	205.041		0.487706	21.5566	10.5001	12.2657	37.6349	17.555	100
fold change	1	2.16428	0.472219	2.5108	2.8125	0.578189																	100
								cko3	1	2	3	4	5	6	Total		% in 1/6	% in 2/6	% in 3/6	% in 4/6	% in 5/6	% in 6/6
	cko2 CxB-1	cko2 CxB-2	cko2 CxB-3	cko2 F-4	cko2 F-5	cko2 F-6			RLuc
	27.4218	27.101	26.5475		24.2771	26.8348			1	0.0366978	0.0320652	0.0738721	0.061144	0.0759718	1.27975		78.1402	2.86758	2.50558	5.77238	4.7778	5.93645
	27.4877	27.4198	26.39	26.0057	24.183	26.7639			Sox5														100
		27.3774	26.0721	26.0195	24.1104	26.82		raw	1	0.986158	0.317361	1.35843	4.58858	1.05393	9.30445		10.7475	10.5988	3.41085	14.5998	49.3159	11.3271
Mean	27.4547	27.2994	26.3365	26.0126	24.1902	26.8063		norm.	1	26.8724	9.89737	18.3889	75.0454	13.8726	145.077		0.689291	18.5229	6.82216	12.6753	51.7281	9.56225	100
∆ CT	0	-0.155351	-1.11823	-1.44214	-3.26459	-0.648488																	100
fold change	1	1.11369	2.17081	2.71723	9.61035	1.56752
	cko3 F-1	cko3 F-2	cko3 F-3	cko3 F-4	cko3 F-5	cko3 F-6
	27.7398	27.6513	29.5554	27.1356	25.5737	27.5758
	27.4513	27.6155	Undetermined	27.0356	25.3504	27.5805
	27.616	27.6008	28.961	27.3102	25.2889	27.4237
Mean	27.6024	27.6225	29.2582	27.1605	25.4043	27.5266
∆ CT	0	0.0201087	1.6558	-0.441936	-2.19805	-0.0757727
fold change	1	0.986158	0.317361	1.35843	4.58858	1.05393
Rluc	CTs
	WT1 F-1	WT1 F-2	WT1 F-3	WT1 F-4	WT1 F-5	WT1 F-6
	18.286	21.6941	20.2625	20.8766	21.3562	21.5588
	18.1668	21.597	20.2862	20.9056	21.3863	21.5861
	18.0159	21.6375	20.1336	20.9212	21.4047	21.6637
Mean	18.1563	21.6429	20.2275	20.9011	21.3824	21.6029
∆ CT	0	3.48662	2.07121	2.74488	3.22617	3.4466
fold change	1	0.0892116	0.237959	0.14918	0.106862	0.091721
	WT2 F-1	WT2 F-2	WT2 F-3	WT2 F-4	WT2 F-5	WT1 F-6
	18.0089	21.5648	20.8732	20.1231	21.7321	21.5539
	17.9888	21.6862		20.1258	21.7606	21.6726
	17.9832	21.6197	20.8181	20.1023	21.6787	21.3205
Mean	17.9936	21.6236	20.8456	20.117	21.7238	21.5157
∆ CT	0	3.62994	2.85197	2.12338	3.73016	3.52202
fold change	1	0.0807754	0.138506	0.229508	0.0753546	0.0870498
	WT3 F-1	WT3 F-2	WT3 F-3	WT3 F-4	WT3 F-5	WT1 F-6
	14.7761			16.3144		16.8993
	14.6772	18.157	18.5829	16.9236	17.7887	16.8022
		17.8384	18.4457	17.5844	17.8268
Mean	14.7267	17.9977	18.5143	16.9408	17.8078	16.8507
∆ CT	0	3.27108	3.78768	2.21416	3.08109	2.12408
fold change	1	0.103588	0.0724095	0.215512	0.118168	0.229398
	CTs
	cko1 F-1	cko1 F-2	cko1 F-3	cko1 F-4	cko1 F-5	cko1 F-6
	17.6781	20.5751	22.146	21.1412	21.5693	22.564
	17.6846	20.4032	22.1745	21.3298	21.5353	22.7049
	17.6795	20.6187		21.2649	21.5773	22.6355
Mean	17.6807	20.5323	22.1603	21.2453	21.5606	22.6348
∆ CT	0	2.85158	4.47953	3.56455	3.87989	4.9541
fold change	1	0.138545	0.0448258	0.0845206	0.0679259	0.0322603
	cko2 CxB-1	cko2 CxB-2	cko2 CxB-3	cko2 F-4	cko2 F-5	cko2 F-6
	17.0001	22.2461	20.3253	20.2744	20.0791	21.5154
	16.9821	22.338	20.3005	20.1115	19.9046	21.3893
	16.9622		20.2486	20.1896	19.9766	21.6034
Mean	16.9815	22.2921	20.2915	20.1918	19.9868	21.5027
∆ CT	0	5.31062	3.31002	3.21034	3.00532	4.52124
fold change	1	0.0251967	0.100829	0.108042	0.12454	0.0435483
	cko3 F-1	cko3 F-2	cko3 F-3	cko3 F-4	cko3 F-5	cko3 F-6
	17.5463	22.3466	22.4874	21.3229	21.561	21.1843
	17.531	22.2428	22.4718	21.3169	21.6487	21.3816
	17.5586	22.3508	22.5651	21.2724	21.521	21.2251
Mean	17.5453	22.3134	22.5081	21.3041	21.5769	21.2637
∆ CT	0	4.76816	4.96285	3.75883	4.03165	3.71839
fold change	1	0.0366978	0.0320652	0.0738721	0.061144	0.0759718

## Sheet: Ctip2
Ctip2	CTs																									Normalized % Ctip2
	WT1 F-1	WT1 F-2	WT1 F-3	WT1 F-4	WT1 F-5	WT1 F-6		WT1	1	2	3	4	5	6	Total		% in 1/6	% in 2/6	% in 3/6	% in 4/6	% in 5/6	% in 6/6				F1 (0 r)	F2 (1r)	F3 (2 &3 r)	F4 (4,5,6)	F5 (7-x)	F6 (x-y)	New F4 (>4 )
	23.837	22.702	22.6002	21.4692	19.3321	20.2607			RLuc																wt1	0.15145	8.11461	3.08824	12.1147	50.2283	26.3027	88.6457
	23.9761	21.7793	21.8558	Undetermined	19.2797	19.9731			1	0.0892116	0.237959	0.14918	0.106862	0.091721	1.67493		59.7039	5.32628	14.2071	8.9066	6.3801	5.4761			wt2	1.19988	7.49487	16.7524	10.562	57.7105	6.28041	74.5529
	25.7921	22.353	22.3133	20.4472	19.5515	21.3906			Ctip2														100		wt3	0.474891	5.58366	23.5746	16.0545	50.6158	3.69651	70.3668
Mean	24.5351	22.2781	22.2564	20.9582	19.3877	20.5415		raw	1	4.77993	4.85227	11.9331	35.441	15.9294	73.9357		1.35253	6.46497	6.56282	16.1399	47.9348	21.545
∆ CT	0	-2.25699	-2.27866	-3.5769	-5.14735	-3.99362		norm.	1	53.5796	20.3912	79.9915	331.65	173.673	660.286		0.15145	8.11461	3.08824	12.1147	50.2283	26.3027	78.455		cko1	0.465327	6.21944	6.56384	23.3308	56.7297	6.69092	86.7514
fold change	1	4.77993	4.85227	11.9331	35.441	15.9294																	73.6973		cko2	0.205036	23.2268	21.3502	16.4721	33.4554	5.29049	55.2179
								WT2	1	2	3	4	5	6	Total		% in 1/6	% in 2/6	% in 3/6	% in 4/6	% in 5/6	% in 6/6			cko3	0.605413	15.6225	7.03017	12.7178	51.4265	12.5976	76.7419
	WT2 F-1	WT2 F-2	WT2 F-3	WT2 F-4	WT2 F-5	WT1 F-6			RLuc
	27.1068	27.22	25.7996	23.9516	24.0829	27.4438			1	0.0807754	0.138506	0.229508	0.0753546	0.0870498	1.61119		62.0658	5.01339	8.59651	14.2446	4.67694	5.40281			Average wt	0.60874	7.06438	14.4717	12.9104	52.8515	12.0932	77.8551
	25.8389	27.7481	25.1716	24.6372	24.9528	27.6235			Ctip2														100		Average CKO	0.425259	15.0229	11.6481	17.5069	47.2039	8.19302	72.9038
	26.4097	27.348	25.5299	27.7229	24.7465	27.6902		raw	1	0.504552	1.93379	2.02025	3.62433	0.455637	9.53856		10.4838	5.2896	20.2734	21.1798	37.9967	4.77679			stdevwt	0.536877	1.31925	10.4319	2.83141	4.21246	12.3734	9.57644
Mean	26.4518	27.4387	25.5004	25.4373	24.5941	27.5858		norm.	1	6.24636	13.9617	8.80252	48.097	5.23421	83.3418		1.19988	7.49487	16.7524	10.562	57.7105	6.28041	100		Stdev cko	0.203173	8.51952	8.40554	5.38165	12.1982	3.87825	16.1133
∆ CT	0	0.986926	-0.95143	-1.01453	-1.85772	1.13404																	100		std error wt	0.309966	0.76167	6.02285	1.63472	2.43206	7.14379	5.52896
fold change	1	0.504552	1.93379	2.02025	3.62433	0.455637		WT3	1	2	3	4	5	6	Total		% in 1/6	% in 2/6	% in 3/6	% in 4/6	% in 5/6	% in 6/6			std erro cko	0.117302	4.91875	4.85294	3.1071	7.04264	2.23911	9.30302
									RLuc
	WT3 F-1	WT3 F-2	WT3 F-3	WT3 F-4	WT3 F-5	WT1 F-6			1	0.103588	0.0724095	0.215512	0.118168	0.229398	1.73908		57.5018	5.95648	4.16368	12.3924	6.79486	13.1908			T-Test	0.609325	0.185079	0.733546	0.260606	0.490655	0.629902	0.671039
	27.4097	27.3482	25.401	23.8939	23.1621	26.37			Ctip2														100
	26.8819	25.8631	24.3891	23.8566	23.1293	25.9923		raw	1	1.21796	3.59457	7.28576	12.5948	1.78561	27.4787		3.63919	4.43237	13.0813	26.5142	45.8347	6.49818
	26.2244	26.4513	25.1884	24.1702	23.2603	25.6443		norm.	1	11.7578	49.6422	33.8067	106.584	7.78391	210.574		0.474891	5.58366	23.5746	16.0545	50.6158	3.69651	100
Mean	26.8386	26.5542	24.9928	23.9736	23.1839	26.0022																	100
∆ CT	0	-0.284464	-1.84582	-2.86508	-3.65475	-0.83642
fold change	1	1.21796	3.59457	7.28576	12.5948	1.78561
								cko1	1	2	3	4	5	6	Total		% in 1/6	% in 2/6	% in 3/6	% in 4/6	% in 5/6	% in 6/6
									RLuc
									1	0.138545	0.0448258	0.0845206	0.0679259	0.0322603	1.36808		73.0953	10.127	3.27655	6.17806	4.96506	2.35808
									Ctip2														100
								raw	1	1.85175	0.632306	4.23773	8.28109	0.46387	16.4667		6.07284	11.2454	3.8399	25.7351	50.2898	2.81701
								norm.	1	13.3657	14.1059	50.1385	121.914	14.379	214.903		0.465327	6.21944	6.56384	23.3308	56.7297	6.69092	100
	CTs																						100
	cko1 F-1	cko1 F-2	cko1 F-3	cko1 F-4	cko1 F-5	cko1 F-6		cko2	1	2	3	4	5	6	Total		% in 1/6	% in 2/6	% in 3/6	% in 4/6	% in 5/6	% in 6/6
	27.6892	27.5753	29.1225	26.8591	25.6199	29.3925			RLuc
	29.3474	27.1251	28.6336	25.8666	25.3349	29.0177			1	0.0251967	0.100829	0.108042	0.12454	0.0435483	1.40216		71.3188	1.79699	7.19101	7.70541	8.88201	3.10581
	28.2473	27.9167	29.5116	26.3083	25.1795	30.1982			Ctip2														100
Mean	28.4279	27.539	29.0892	26.3446	25.3781	29.5361		raw	1	2.85431	10.4992	8.67978	20.3209	1.12366	44.4779		2.24831	6.41738	23.6055	19.5148	45.6876	2.52634
∆ CT	0	-0.888891	0.661305	-2.08329	-3.04982	1.10821		norm.	1	113.281	104.129	80.3372	163.168	25.8027	487.718		0.205036	23.2268	21.3502	16.4721	33.4554	5.29049	100
fold change	1	1.85175	0.632306	4.23773	8.28109	0.46387																	100
								cko3	1	2	3	4	5	6	Total		% in 1/6	% in 2/6	% in 3/6	% in 4/6	% in 5/6	% in 6/6
	cko2 CxB-1	cko2 CxB-2	cko2 CxB-3	cko2 F-4	cko2 F-5	cko2 F-6			RLuc
	27.4218	25.727	24.4982	23.7362	23.2317	27.2947			1	0.0366978	0.0320652	0.0738721	0.061144	0.0759718	1.27975		78.1402	2.86758	2.50558	5.77238	4.7778	5.93645
	27.4877	26.8006	24.1042	24.9006	23.1488	27.6166			Ctip2														100
	27.7997	25.6422	23.9301	24.7194	23.294	27.2932		raw	1	0.946978	0.372347	1.55181	5.19385	1.58085	10.6458		9.39335	8.89529	3.49759	14.5767	48.7876	14.8494
Mean	27.5697	26.0566	24.1775	24.4521	23.2248	27.4015		norm.	1	25.8047	11.6122	21.0068	84.9446	20.8083	165.177		0.605413	15.6225	7.03017	12.7178	51.4265	12.5976	100
∆ CT	0	-1.51314	-3.39221	-3.11766	-4.34489	-0.16821																	100
fold change	1	2.85431	10.4992	8.67978	20.3209	1.12366
	cko3 F-1	cko3 F-2	cko3 F-3	cko3 F-4	cko3 F-5	cko3 F-6
	27.4385	27.4952	28.675	26.3789	25.0059	26.4647
	27.6402	26.8968	28.3834	26.3177	24.5691	26.3931
	26.3154	27.2378	28.6116	26.7956	24.6887	26.5542
Mean	27.1314	27.21	28.5566	26.4974	24.7546	26.4707
∆ CT	0	0.0785977	1.42528	-0.633955	-2.3768	-0.660698
fold change	1	0.946978	0.372347	1.55181	5.19385	1.58085
Rluc	CTs
	WT1 F-1	WT1 F-2	WT1 F-3	WT1 F-4	WT1 F-5	WT1 F-6
	18.286	21.6941	20.2625	20.8766	21.3562	21.5588
	18.1668	21.597	20.2862	20.9056	21.3863	21.5861
	18.0159	21.6375	20.1336	20.9212	21.4047	21.6637
Mean	18.1563	21.6429	20.2275	20.9011	21.3824	21.6029
∆ CT	0	3.48662	2.07121	2.74488	3.22617	3.4466
fold change	1	0.0892116	0.237959	0.14918	0.106862	0.091721
	WT2 F-1	WT2 F-2	WT2 F-3	WT2 F-4	WT2 F-5	WT1 F-6
	18.0089	21.5648	20.8732	20.1231	21.7321	21.5539
	17.9888	21.6862		20.1258	21.7606	21.6726
	17.9832	21.6197	20.8181	20.1023	21.6787	21.3205
Mean	17.9936	21.6236	20.8456	20.117	21.7238	21.5157
∆ CT	0	3.62994	2.85197	2.12338	3.73016	3.52202
fold change	1	0.0807754	0.138506	0.229508	0.0753546	0.0870498
	WT3 F-1	WT3 F-2	WT3 F-3	WT3 F-4	WT3 F-5	WT1 F-6
	14.7761			16.3144		16.8993
	14.6772	18.157	18.5829	16.9236	17.7887	16.8022
		17.8384	18.4457	17.5844	17.8268
Mean	14.7267	17.9977	18.5143	16.9408	17.8078	16.8507
∆ CT	0	3.27108	3.78768	2.21416	3.08109	2.12408
fold change	1	0.103588	0.0724095	0.215512	0.118168	0.229398
	CTs
	cko1 F-1	cko1 F-2	cko1 F-3	cko1 F-4	cko1 F-5	cko1 F-6
	17.6781	20.5751	22.146	21.1412	21.5693	22.564
	17.6846	20.4032	22.1745	21.3298	21.5353	22.7049
	17.6795	20.6187		21.2649	21.5773	22.6355
Mean	17.6807	20.5323	22.1603	21.2453	21.5606	22.6348
∆ CT	0	2.85158	4.47953	3.56455	3.87989	4.9541
fold change	1	0.138545	0.0448258	0.0845206	0.0679259	0.0322603
	cko2 CxB-1	cko2 CxB-2	cko2 CxB-3	cko2 F-4	cko2 F-5	cko2 F-6
	17.0001	22.2461	20.3253	20.2744	20.0791	21.5154
	16.9821	22.338	20.3005	20.1115	19.9046	21.3893
	16.9622		20.2486	20.1896	19.9766	21.6034
Mean	16.9815	22.2921	20.2915	20.1918	19.9868	21.5027
∆ CT	0	5.31062	3.31002	3.21034	3.00532	4.52124
fold change	1	0.0251967	0.100829	0.108042	0.12454	0.0435483
	cko3 F-1	cko3 F-2	cko3 F-3	cko3 F-4	cko3 F-5	cko3 F-6
	17.5463	22.3466	22.4874	21.3229	21.561	21.1843
	17.531	22.2428	22.4718	21.3169	21.6487	21.3816
	17.5586	22.3508	22.5651	21.2724	21.521	21.2251
Mean	17.5453	22.3134	22.5081	21.3041	21.5769	21.2637
∆ CT	0	4.76816	4.96285	3.75883	4.03165	3.71839
fold change	1	0.0366978	0.0320652	0.0738721	0.061144	0.0759718
