# Supplementary material for: Pum2 and TDP-43 refine area-specific cytoarchitecture post-mitotically and modulate translation of Sox5, Bcl11b, and Rorb mRNAs in developing mouse neocortex
Source: eLife. 2022 Mar 9;11:e55199. doi: 10.7554/eLife.55199 (PMC8906809; doi:10.7554/eLife.55199)
Supplement: Source data 24. — Quantification of polysome profiling from E14.5 neocortices of Pum2 cKO (Figure 9—figure supplement 3b). Histograms showing the distribution of the Sox5, Bcl11b, and Rorb mRNAs at E14.5 across polysome gradient fractions for Pum2 cKO relative to controls. Values were normalized to an RLuc mRNA spike-in control, which was added in an equal amount to the fractions prior to RNA preparation. Data are represented as means ± standard error of the mean (SEM). **p≤0.01 by two-tailed t-test. [file elife-55199-data24.xlsx]

## Sheet: Sox5
Sox5	CTs																									Normalized % Sox5
	WT1 F-1	WT1 F-2	WT1 F-3	WT1 F-4	WT1 F-5	WT1 F-6		WT1	1	2	3	4	5	6	Total		% in 1/6	% in 2/6	% in 3/6	% in 4/6	% in 5/6	% in 6/6				F1 (0 r)	F2 (1r)	F3 (2&3)	F4 (4,5,6)	F5 (7-x)	F6 (x-y)	New F4 (>4)
			28.908	28.3197	27.2787	29.2782			Rluc																wt1	4.5646	17.034	9.6605	23.5143	34.606	10.6206	68.7409
	28.8249	29.3475		28.3677	27.3614				1	0.1925	0.426397	0.267022	0.368869	0.29744	2.55223		39.1815	7.54242	16.7069	10.4623	14.4528	11.6541			wt2	2.47536	26.7082	10.512	17.4117	26.206	16.6868	60.3045
	28.7825	29.2143	28.9956			29.3912			Sox5																wt3	3.38339	20.5175	9.87404	11.0168	38.3357	16.8726	66.2251
Mean	28.8037	29.2809	28.9518	28.3437	27.32	29.3347		raw	1	0.718364	0.902426	1.37555	2.79654	0.692063	7.48494		13.3602	9.59745	12.0566	18.3776	37.3622	9.24607
∆ CT	0	0.477214	0.14812	-0.460009	-1.48364	0.531025		norm.	1	3.73177	2.1164	5.15145	7.58139	2.32673	21.9077		4.5646	17.034	9.6605	23.5143	34.606	10.6206			CKO1	0.656416	9.12892	10.7514	29.4193	41.4941	8.5499	79.4633
fold change	1	0.718364	0.902426	1.37555	2.79654	0.692063																			CKO2	1.56326	27.9769	11.8311	16.352	34.3615	7.91527	58.6288
								WT2	1	2	3	4	5	6	Total		% in 1/6	% in 2/6	% in 3/6	% in 4/6	% in 5/6	% in 6/6			CKO3	4.19148	12.6457	17.2614	14.1208	41.081	10.6996	65.9014
	WT2 F-1	WT2 F-2	WT2 F-3	WT2 F-4	WT2 F-5	WT1 F-6			Rluc
	26.8378	27.8187		27.0693	25.055	25.0061			1	0.0523504	0.292212	0.123526	0.34013	0.546643	2.35486		42.4653	2.22308	12.4089	5.24556	14.4437	23.2134			Average wt sox5/Rluc	3.47445	21.4199	10.0155	17.3143	33.0492	14.7267	65.0902
	26.9505		26.5384	27.1245	25.0366				Sox5																Average CKO sox5/Rluc	2.13705	16.5839	13.2813	19.964	38.9789	9.05493	67.9978
		27.6178	26.6271			25.0189		raw	1	0.564841	1.24092	0.868882	3.60088	3.68502	10.9605		9.12363	5.1534	11.3217	7.92736	32.8531	33.6208			stdevwt	1.04759	4.8998	0.442999	6.24932	6.21287	3.55717	4.33117
Mean	26.8941	27.7182	26.5827	27.0969	25.0458	25.0125		norm.	1	10.7896	4.24664	7.03402	10.5868	6.74118	40.3982		2.47536	26.7082	10.512	17.4117	26.206	16.6868			Stdev cko	1.83606	10.0221	3.48889	8.26415	4.00407	1.45927	10.5743
∆ CT	0	0.824083	-0.311409	0.202767	-1.84835	-1.88167																			std error wt	0.604828	2.8289	0.255766	3.60804	3.587	2.05373	2.5006
fold change	1	0.564841	1.24092	0.868882	3.60088	3.68502		WT3	1	2	3	4	5	6	Total		% in 1/6	% in 2/6	% in 3/6	% in 4/6	% in 5/6	% in 6/6			std erro CKO	1.06005	5.78628	2.01431	4.77131	2.31175	0.842507	6.10506
									Rluc
	WT3 F-1	WT3 F-2	WT3 F-3	WT3 F-4	WT3 F-5	WT1 F-6			1	0.171222	0.32056	0.530716	0.533681	0.884635	3.44081		29.0629	4.97619	9.31641	15.4241	15.5103	25.7101			T-Test	0.334708	0.494504	0.183034	0.680697	0.237021	0.0629688	0.682181
		27.4614				25.4371			Sox5
	27.6238	27.7831	27.6751	26.9739	25.042	25.6379		raw	1	1.03832	0.935517	1.72809	6.04689	4.41157	15.1604		6.59614	6.84889	6.1708	11.3987	39.8862	29.0993
	27.7293		27.8703	26.8008	25.1187	25.5306		norm.	1	6.06417	2.91838	3.25615	11.3305	4.98688	29.5561		3.38339	20.5175	9.87404	11.0168	38.3357	16.8726
Mean	27.6765	27.6223	27.7727	26.8873	25.0803	25.5352
∆ CT	0	-0.0542479	0.0961637	-0.789177	-2.59619	-2.14129
fold change	1	1.03832	0.935517	1.72809	6.04689	4.41157		CKO1	1	2	3	4	5	6	Total		% in 1/6	% in 2/6	% in 3/6	% in 4/6	% in 5/6	% in 6/6
									Rluc
									1	0.0438991	0.134591	0.0393152	0.078705	0.17668	1.47319		67.8799	2.97987	9.13603	2.66871	5.34249	11.993
									Sox5
								raw	1	0.610515	2.20446	1.76203	4.97519	2.30128	12.8535		7.77999	4.7498	17.1507	13.7086	38.7069	17.904
	CTs							norm.	1	13.9072	16.3789	44.8181	63.2131	13.0251	152.342		0.656416	9.12892	10.7514	29.4193	41.4941	8.5499
	CKO1 F-1	CKO1 F-2	CKO1 F-3	CKO1 F-4	CKO1 F-5	CKO1 F-6
	27.0108	27.6892	25.8212	26.2309	24.6557			CKO2	1	2	3	4	5	6	Total		% in 1/6	% in 2/6	% in 3/6	% in 4/6	% in 5/6	% in 6/6
		27.5804	25.816	26.0526	24.7184	25.7465			Rluc
	26.9072	27.7432			24.5587	25.7666			1	0.0261195	0.389576	0.360614	0.516973	0.355284	2.64857		37.7563	0.986174	14.7089	13.6154	19.519	13.4142
Mean	26.959	27.6709	25.8186	26.1418	24.6443	25.7566			Sox5
∆ CT	0	0.711902	-1.14043	-0.817241	-2.31475	-1.20244		raw	1	0.467447	2.94839	3.77209	11.3634	1.79891	21.3503		4.68378	2.18942	13.8096	17.6677	53.2238	8.42571
fold change	1	0.610515	2.20446	1.76203	4.97519	2.30128		norm.	1	17.8965	7.5682	10.4602	21.9807	5.06331	63.9689		1.56326	27.9769	11.8311	16.352	34.3615	7.91527
	CKO2 F-1	CKO2 F-2	CKO2 F-3	CKO2 F-4	CKO2 F-5	CKO2 F-6		CKO3	1	2	3	4	5	6	Total		% in 1/6	% in 2/6	% in 3/6	% in 4/6	% in 5/6	% in 6/6
	27.9719	29.1326		26.0614	24.541	27.1141			Rluc
		29.0082	26.3423		24.4607	27.2011			1	0.225931	0.229213	0.172667	0.377693	1.39132	3.39682		29.4393	6.65124	6.74786	5.0832	11.119	40.9594
	27.9747		26.4844	26.0544	24.3991	27.0633			Sox5
Mean	27.9733	29.0704	26.4133	26.0579	24.4669	27.1261		raw	1	0.681635	0.943946	0.581702	3.70179	3.55163	10.4607		9.55959	6.51615	9.02373	5.56084	35.3876	33.9521
∆ CT	0	1.09712	-1.55993	-1.91536	-3.50633	-0.847123		norm.	1	3.01701	4.11821	3.36892	9.80106	2.55271	23.8579		4.19148	12.6457	17.2614	14.1208	41.081	10.6996
fold change	1	0.467447	2.94839	3.77209	11.3634	1.79891
	CKO3 F-1	CKO3 F-2	CKO3 F-3	CKO3 F-4	CKO3 F-5	CKO3 F-6
	27.4745		27.5787	28.2545		25.5926
		28.1307	27.5316		25.5946
	27.4694	27.919		28.2526	25.5728	25.6943
Mean	27.4719	28.0249	27.5552	28.2536	25.5837	25.6435
∆ CT	0	0.552929	0.0832243	0.781647	-1.88822	-1.82848
fold change	1	0.681635	0.943946	0.581702	3.70179	3.55163
Rluc	CTs
	WT1 F-1	WT1 F-2	WT1 F-3	WT1 F-4	WT1 F-5	WT1 F-6
			21.1274			21.708
	19.9414	22.3889	21.3117	21.9575	21.3732	21.7896
	20.0576	22.3642	21.2485	21.8514	21.5035
Mean	19.9995	22.3766	21.2292	21.9045	21.4383	21.7488
∆ CT	0	2.37707	1.22973	1.90497	1.43882	1.74933
fold change	1	0.1925	0.426397	0.267022	0.368869	0.29744
	WT2 F-1	WT2 F-2	WT2 F-3	WT2 F-4	WT2 F-5	WT1 F-6
		22.2932	19.7914	20.9381	19.4816
	17.956	22.2633		21.1745	19.6922	18.8729
	18.0892		19.8036	21.0065	19.5614	18.9149
Mean	18.0226	22.2782	19.7975	21.0397	19.5784	18.8939
∆ CT	0	4.25566	1.77491	3.01712	1.55584	0.871328
fold change	1	0.0523504	0.292212	0.123526	0.34013	0.546643
	WT3 F-1	WT3 F-2	WT3 F-3	WT3 F-4	WT3 F-5	WT1 F-6
			20.6124	19.783	19.8766	18.9878
	18.9831	21.5397	20.6131	19.9878		19.3087
	18.9598	21.4952			19.8782
Mean	18.9714	21.5175	20.6127	19.8854	19.8774	19.1483
∆ CT	0	2.54606	1.64133	0.913988	0.905951	0.176846
fold change	1	0.171222	0.32056	0.530716	0.533681	0.884635
	CTs
	CKO1 F-1	CKO1 F-2	CKO1 F-3	CKO1 F-4	CKO1 F-5	CKO1 F-6
			19.86
	16.9891	21.5038		21.6832	20.6775	19.496
	16.9724	21.477	19.8881	21.6158	20.6187	19.467
Mean	16.9807	21.4904	19.8741	21.6495	20.6481	19.4815
∆ CT	0	4.50966	2.89334	4.66877	3.6674	2.50079
fold change	1	0.0438991	0.134591	0.0393152	0.078705	0.17668
	CKO2 F-1	CKO2 F-2	CKO2 F-3	CKO2 F-4	CKO2 F-5	CKO2 F-6
	18.6471	24.0447	20.0069	20.1344	19.6053	20.1169
		23.7946
	18.6748		20.035	20.1304	19.6203	20.1909
Mean	18.6609	23.9197	20.021	20.1324	19.6128	20.1539
∆ CT	0	5.25873	1.36002	1.47147	0.951838	1.49296
fold change	1	0.0261195	0.389576	0.360614	0.516973	0.355284
	CKO3 F-1	CKO3 F-2	CKO3 F-3	CKO3 F-4	CKO3 F-5	CKO3 F-6
	18.5965	20.6817		21.0623		17.9782
		20.7882	20.7245	21.1833	20.0138	18.2467
	18.5813		20.7037		19.9734
Mean	18.5889	20.7349	20.7141	21.1228	19.9936	18.1124
∆ CT	0	2.14605	2.12524	2.53393	1.40471	-0.476452
fold change	1	0.225931	0.229213	0.172667	0.377693	1.39132

## Sheet: Ctip2
Ctip2	CTs																									Normalized % Ctip2
	WT1 F-1	WT1 F-2	WT1 F-3	WT1 F-4	WT1 F-5	WT1 F-6		WT1	1	2	3	4	5	6	Total		% in 1/6	% in 2/6	% in 3/6	% in 4/6	% in 5/6	% in 6/6				F1 (0 r)	F2 (1r)	F3 (2&3)	F4 (4,5,6)	F5 (7-x)	F6 (x-y)	New F4 (>4)
	27.2813								Rluc																wt1	4.20883	13.4685	6.02	19.1827	52.3771	4.74292	76.3026
	27.7411	27.8383	28.1042	27.2042	25.0788	29.3542			1	0.1925	0.426397	0.267022	0.368869	0.29744	2.55223		39.1815	7.54242	16.7069	10.4623	14.4528	11.6541			wt2	0.839134	11.8236	7.17798	11.1707	62.8658	6.12281	80.1593
		28.5819	28.3449	27.2514	25.5463	28.8221			Ctip2														100		wt3	1.54682	8.7128	8.51065	22.0289	49.795	9.40587	81.2297
Mean	27.5112	28.2101	28.2245	27.2278	25.3125	29.0881		raw	1	0.616012	0.609886	1.21701	4.59041	0.335184	8.3685		11.9496	7.36107	7.28788	14.5427	54.8534	4.00531
∆ CT	0	0.698971	0.713387	-0.28334	-2.19862	1.57697		norm.	1	3.20007	1.43033	4.55771	12.4446	1.1269	23.7596		4.20883	13.4685	6.02	19.1827	52.3771	4.74292	100		CKO1	0.534216	6.01411	10.0434	28.3113	49.4442	5.65283	83.4083
fold change	1	0.616012	0.609886	1.21701	4.59041	0.335184																	100		CKO2	0.719469	15.4191	11.4042	17.8998	46.6694	7.88808	72.4573
								WT2	1	2	3	4	5	6	Total		% in 1/6	% in 2/6	% in 3/6	% in 4/6	% in 5/6	% in 6/6			CKO3	1.484	7.05629	11.2599	26.8199	48.9944	4.3856	80.1999
	WT2 F-1	WT2 F-2	WT2 F-3	WT2 F-4	WT2 F-5	WT1 F-6			Rluc
		26.5945			21.5646	24.4719			1	0.0523504	0.292212	0.123526	0.34013	0.546643	2.35486		42.4653	2.22308	12.4089	5.24556	14.4437	23.2134			Average wt Ctip2/Rluc	2.19826	11.335	7.23621	17.4607	55.0126	6.7572	79.2306
	26.2964	26.9261	25.0567	25.6514	22.1447	24.5884			Ctip2														100		Average CKO Ctip2/Rluc	0.912562	9.49648	10.9025	24.3436	48.3693	5.9755	78.6885
	26.7557	27.3746	25.3521	25.9657				raw	1	0.737628	2.49959	1.6444	25.4817	3.98863	35.3519		2.8287	2.08653	7.07059	4.65151	72.08	11.2826			stdevwt	1.77679	2.41523	1.24635	5.63015	6.92249	2.39533	2.59152
Mean	26.5261	26.9651	25.2044	25.8085	21.8547	24.5302		norm.	1	14.0902	8.55403	13.3122	74.9174	7.29658	119.17		0.839134	11.8236	7.17798	11.1707	62.8658	6.12281	100		Stdev cko	0.503474	5.1555	0.747486	5.63014	1.48924	1.77339	5.62976
∆ CT	0	0.439034	-1.32169	-0.717559	-4.67139	-1.99589																	100		std error wt	1.02583	1.39443	0.719579	3.25057	3.9967	1.38294	1.49622
fold change	1	0.737628	2.49959	1.6444	25.4817	3.98863		WT3	1	2	3	4	5	6	Total		% in 1/6	% in 2/6	% in 3/6	% in 4/6	% in 5/6	% in 6/6			std erro CKO	0.290681	2.97653	0.431561	3.25056	0.859814	1.02387	3.25035
									Rluc
	WT3 F-1	WT3 F-2	WT3 F-3	WT3 F-4	WT3 F-5	WT1 F-6			1	0.171222	0.32056	0.530716	0.533681	0.884635	3.44081		29.0629	4.97619	9.31641	15.4241	15.5103	25.7101			T-Test	0.294325	0.605774	0.0119734	0.208674	0.179485	0.673181	0.88692
		27.2319	25.8481	24.1628	22.3534	24.0004			Ctip2														100					**
	27.1808	27.2099	26.3141	24.3385	23.0837	24.7472		raw	1	0.964443	1.76373	7.55813	17.1802	5.37927	33.8457		2.95458	2.84952	5.21109	22.3311	50.7602	15.8935
	27.1566		26.8879		23.761	25.4763		norm.	1	5.63272	5.50203	14.2414	32.1918	6.08078	64.6487		1.54682	8.7128	8.51065	22.0289	49.795	9.40587	100
Mean	27.1687	27.2209	26.3501	24.2507	23.066	24.7413																	100
∆ CT	0	0.0522327	-0.818631	-2.91803	-4.10267	-2.42741
fold change	1	0.964443	1.76373	7.55813	17.1802	5.37927		CKO1	1	2	3	4	5	6	Total		% in 1/6	% in 2/6	% in 3/6	% in 4/6	% in 5/6	% in 6/6
									Rluc
									1	0.0438991	0.134591	0.0393152	0.078705	0.17668	1.47319		67.8799	2.97987	9.13603	2.66871	5.34249	11.993	100
									Ctip2
								raw	1	0.494208	2.53035	2.08355	7.28452	1.86955	15.2622		6.55215	3.23813	16.5792	13.6517	47.7293	12.2496	100
	CTs							norm.	1	11.2578	18.8002	52.9959	92.5547	10.5815	187.19		0.534216	6.01411	10.0434	28.3113	49.4442	5.65283	100
	CKO1 F-1	CKO1 F-2	CKO1 F-3	CKO1 F-4	CKO1 F-5	CKO1 F-6
	25.5235	26.9377	24.5458	24.8127	23.0129			CKO2	1	2	3	4	5	6	Total		% in 1/6	% in 2/6	% in 3/6	% in 4/6	% in 5/6	% in 6/6
	26.3339	26.9533	24.6329	24.9265	23.1148	24.9498			Rluc
						25.1022			1	0.0261195	0.389576	0.360614	0.516973	0.355284	2.64857		37.7563	0.986174	14.7089	13.6154	19.519	13.4142	100
Mean	25.9287	26.9455	24.5893	24.8696	23.0638	25.026			Ctip2
∆ CT	0	1.01681	-1.33933	-1.05904	-2.86483	-0.90269		raw	1	0.559771	6.17511	8.97178	33.5343	3.89524	54.1362		1.84719	1.034	11.4066	16.5726	61.9443	7.19527	100
fold change	1	0.494208	2.53035	2.08355	7.28452	1.86955		norm.	1	21.4312	15.8508	24.8792	64.8665	10.9638	138.991		0.719469	15.4191	11.4042	17.8998	46.6694	7.88808	100
	CKO2 F-1	CKO2 F-2	CKO2 F-3	CKO2 F-4	CKO2 F-5	CKO2 F-6		CKO3	1	2	3	4	5	6	Total		% in 1/6	% in 2/6	% in 3/6	% in 4/6	% in 5/6	% in 6/6
			24.3339	23.6299		25.1163			Rluc
	27.1884	27.9822	25.2107	24.2064	22.1335	25.7578			1	0.225931	0.229213	0.172667	0.377693	1.39132	3.39682		29.4393	6.65124	6.74786	5.0832	11.119	40.9594	100
	27.6091	28.4895		24.8638	22.5289				Ctip2
Mean	27.3988	28.2358	24.7723	24.2334	22.3312	25.437		raw	1	1.07428	1.73915	3.12056	12.4696	4.1117	23.5153		4.25256	4.56844	7.39584	13.2704	53.0275	17.4852	100
∆ CT	0	0.837092	-2.62646	-3.16539	-5.06756	-1.96171		norm.	1	4.75491	7.5875	18.0727	33.0151	2.95526	67.3854		1.484	7.05629	11.2599	26.8199	48.9944	4.3856	100
fold change	1	0.559771	6.17511	8.97178	33.5343	3.89524
	CKO3 F-1	CKO3 F-2	CKO3 F-3	CKO3 F-4	CKO3 F-5	CKO3 F-6
				25.3559
	26.9107	26.8314	26.2866		23.3494	25.071
	27.08	26.9526	26.1074	25.3512	23.3607	24.8403
Mean	26.9954	26.892	26.197	25.3535	23.355	24.9556
∆ CT	0	-0.103371	-0.798384	-1.64181	-3.64034	-2.03973
fold change	1	1.07428	1.73915	3.12056	12.4696	4.1117
Rluc	CTs
	WT1 F-1	WT1 F-2	WT1 F-3	WT1 F-4	WT1 F-5	WT1 F-6
			21.1274			21.708
	19.9414	22.3889	21.3117	21.9575	21.3732	21.7896
	20.0576	22.3642	21.2485	21.8514	21.5035
Mean	19.9995	22.3766	21.2292	21.9045	21.4383	21.7488
∆ CT	0	2.37707	1.22973	1.90497	1.43882	1.74933
fold change	1	0.1925	0.426397	0.267022	0.368869	0.29744
	WT2 F-1	WT2 F-2	WT2 F-3	WT2 F-4	WT2 F-5	WT1 F-6
		22.2932	19.7914	20.9381	19.4816
	17.956	22.2633		21.1745	19.6922	18.8729
	18.0892		19.8036	21.0065	19.5614	18.9149
Mean	18.0226	22.2782	19.7975	21.0397	19.5784	18.8939
∆ CT	0	4.25566	1.77491	3.01712	1.55584	0.871328
fold change	1	0.0523504	0.292212	0.123526	0.34013	0.546643
	WT3 F-1	WT3 F-2	WT3 F-3	WT3 F-4	WT3 F-5	WT1 F-6
			20.6124	19.783	19.8766	18.9878
	18.9831	21.5397	20.6131	19.9878		19.3087
	18.9598	21.4952			19.8782
Mean	18.9714	21.5175	20.6127	19.8854	19.8774	19.1483
∆ CT	0	2.54606	1.64133	0.913988	0.905951	0.176846
fold change	1	0.171222	0.32056	0.530716	0.533681	0.884635
	CTs
	CKO1 F-1	CKO1 F-2	CKO1 F-3	CKO1 F-4	CKO1 F-5	CKO1 F-6
			19.86
	16.9891	21.5038		21.6832	20.6775	19.496
	16.9724	21.477	19.8881	21.6158	20.6187	19.467
Mean	16.9807	21.4904	19.8741	21.6495	20.6481	19.4815
∆ CT	0	4.50966	2.89334	4.66877	3.6674	2.50079
fold change	1	0.0438991	0.134591	0.0393152	0.078705	0.17668
	CKO2 F-1	CKO2 F-2	CKO2 F-3	CKO2 F-4	CKO2 F-5	CKO2 F-6
	18.6471	24.0447	20.0069	20.1344	19.6053	20.1169
		23.7946
	18.6748		20.035	20.1304	19.6203	20.1909
Mean	18.6609	23.9197	20.021	20.1324	19.6128	20.1539
∆ CT	0	5.25873	1.36002	1.47147	0.951838	1.49296
fold change	1	0.0261195	0.389576	0.360614	0.516973	0.355284
	CKO3 F-1	CKO3 F-2	CKO3 F-3	CKO3 F-4	CKO3 F-5	CKO3 F-6
	18.5965	20.6817		21.0623		17.9782
		20.7882	20.7245	21.1833	20.0138	18.2467
	18.5813		20.7037		19.9734
Mean	18.5889	20.7349	20.7141	21.1228	19.9936	18.1124
∆ CT	0	2.14605	2.12524	2.53393	1.40471	-0.476452
fold change	1	0.225931	0.229213	0.172667	0.377693	1.39132

## Sheet: Rorb
Rorb	CTs																									Normalized % Rorb
	WT1 F-1	WT1 F-2	WT1 F-3	WT1 F-4	WT1 F-5	WT1 F-6		WT1	1	2	3	4	5	6	Total		% in 1/6	% in 2/6	% in 3/6	% in 4/6	% in 5/6	% in 6/6				F1 (0 r)	F2 (1r)	F3 (2&3)	F4 (4,5,6)	F5 (7-x)	F6 (x-y)	New F4 (>4)
	30.0339	31.5224	30.7472	30.3482	29.0474	31.9363			Rluc																wt1	7.84163	11.7637	10.6945	16.9463	45.212	7.54189	69.7002
	30.3561	32.3231	30.6066	30.8124	28.8867	Undetermined			1	0.1925	0.426397	0.267022	0.368869	0.29744	2.55223		39.1815	7.54242	16.7069	10.4623	14.4528	11.6541			wt2	5.05076	18.1722	13.3493	27.5447	32.3207	3.5624	63.4278
	30.0023		31.3847	31.6114	29.1922	Undetermined			Rorb														100		wt3	4.67619	21.4567	11.5405	22.3334	39.0177	0.975507	62.3266
Mean	30.1308	31.9227	30.9129	30.924	29.0421	31.9363		raw	1	0.288781	0.581523	0.577054	2.12676	0.286071	4.86019		20.5753	5.94176	11.965	11.8731	43.7588	5.886
∆ CT	0	1.79195	0.782092	0.793222	-1.08866	1.80556		norm.	1	1.50016	1.36381	2.16107	5.76564	0.961777	12.7525		7.84163	11.7637	10.6945	16.9463	45.212	7.54189	100		CKO1	3.9293	8.41337	17.3507	33.0828	35.3127	1.91106	70.3066
fold change	1	0.288781	0.581523	0.577054	2.12676	0.286071																	100		CKO2	4.18952	30.9542	12.7116	16.7546	33.75	1.64003	52.1447
								WT2	1	2	3	4	5	6	Total		% in 1/6	% in 2/6	% in 3/6	% in 4/6	% in 5/6	% in 6/6			CKO3	9.75637	10.3541	17.8126	19.3569	41.44	1.27997	62.0769
	WT2 F-1	WT2 F-2	WT2 F-3	WT2 F-4	WT2 F-5	WT1 F-6			Rluc
	27.6504	30.4722	28.2642	28.4586	26.8819	29.3043			1	0.0523504	0.292212	0.123526	0.34013	0.546643	2.35486		42.4653	2.22308	12.4089	5.24556	14.4437	23.2134			Average wt Rorb/Rluc	5.85619	17.1309	11.8614	22.2748	38.8501	4.0266	65.1515
	28.2902	30.3354	28.4718	28.6718					Rorb														100		Average CKO Rorb/Rluc	5.9584	16.5739	15.9583	23.0648	36.8343	1.61035	61.5094
	28.0453				26.8646	29.4363		raw	1	0.188352	0.772322	0.673656	2.17656	0.385558	5.19644		19.2439	3.62463	14.8625	12.9638	41.8855	7.41965			stdevwt	1.72961	4.92967	1.35619	5.2994	6.44724	3.30771	3.97754
Mean	27.9953	30.4038	28.368	28.5652	26.8733	29.3703		norm.	1	3.59791	2.64302	5.45357	6.39919	0.705319	19.799		5.05076	18.1722	13.3493	27.5447	32.3207	3.5624	100		Stdev cko	3.29172	12.4915	2.82119	8.7729	4.06451	0.316586	9.09426
∆ CT	0	2.4085	0.372725	0.569916	-1.12205	1.37498																	100		std error wt	0.99859	2.84614	0.782994	3.05961	3.72232	1.90971	2.29644
fold change	1	0.188352	0.772322	0.673656	2.17656	0.385558		WT3	1	2	3	4	5	6	Total		% in 1/6	% in 2/6	% in 3/6	% in 4/6	% in 5/6	% in 6/6			std erro CKO	1.90047	7.21195	1.62882	5.06503	2.34664	0.182781	5.25057
									Rluc
	WT3 F-1	WT3 F-2	WT3 F-3	WT3 F-4	WT3 F-5	WT1 F-6			1	0.171222	0.32056	0.530716	0.533681	0.884635	3.44081		29.0629	4.97619	9.31641	15.4241	15.5103	25.7101			T-Test	0.964312	0.94618	0.0860173	0.900248	0.670647	0.276336	0.559617
			29.741		27.2125				Rorb														100
	29.3194	29.8399		28.1091	27.2029	32.3028		raw	1	0.78565	0.791121	2.5347	4.45299	0.184545	9.749		10.2575	8.05878	8.11489	25.9996	45.6764	1.89297
	29.4055	29.5811	29.66	27.9322		31.298		norm.	1	4.5885	2.46793	4.77599	8.34391	0.208612	21.385		4.67619	21.4567	11.5405	22.3334	39.0177	0.975507	100
Mean	29.3625	29.7105	29.7005	28.0206	27.2077	31.8004																	100
∆ CT	0	0.348041	0.33803	-1.34181	-2.15477	2.43795
fold change	1	0.78565	0.791121	2.5347	4.45299	0.184545		CKO1	1	2	3	4	5	6	Total		% in 1/6	% in 2/6	% in 3/6	% in 4/6	% in 5/6	% in 6/6
									Rluc
									1	0.0438991	0.134591	0.0393152	0.078705	0.17668	1.47319		67.8799	2.97987	9.13603	2.66871	5.34249	11.993	100
									Rorb
								raw	1	0.0939963	0.594319	0.331015	0.707325	0.0859303	2.81259		35.5545	3.34199	21.1307	11.7691	25.1486	3.05521	100
	CTs							norm.	1	2.14119	4.41573	8.41952	8.98703	0.486361	25.4498		3.9293	8.41337	17.3507	33.0828	35.3127	1.91106	100
	CKO1 F-1	CKO1 F-2	CKO1 F-3	CKO1 F-4	CKO1 F-5	CKO1 F-6
	27.2186		27.9176	28.6414		30.2433		CKO2	1	2	3	4	5	6	Total		% in 1/6	% in 2/6	% in 3/6	% in 4/6	% in 5/6	% in 6/6
		30.6817	27.9292	28.8941	27.6446				Rluc
	27.1268	30.4863			27.6999	31.1835			1	0.0261195	0.389576	0.360614	0.516973	0.355284	2.64857		37.7563	0.986174	14.7089	13.6154	19.519	13.4142	100
Mean	27.1727	30.584	27.9234	28.7677	27.6723	30.7134			Rorb
∆ CT	0	3.41125	0.75069	1.59503	0.499556	3.54069		raw	1	0.192983	1.18203	1.44216	4.16465	0.139079	8.1209		12.3139	2.37638	14.5554	17.7586	51.2831	1.71261	100
fold change	1	0.0939963	0.594319	0.331015	0.707325	0.0859303		norm.	1	7.38849	3.03415	3.99917	8.05583	0.39146	23.8691		4.18952	30.9542	12.7116	16.7546	33.75	1.64003	100
	CKO2 F-1	CKO2 F-2	CKO2 F-3	CKO2 F-4	CKO2 F-5	CKO2 F-6		CKO3	1	2	3	4	5	6	Total		% in 1/6	% in 2/6	% in 3/6	% in 4/6	% in 5/6	% in 6/6
		30.3293		27.8658	26.5019	31.3142			Rluc
	28.5066	31.5957	28.4206	28.0886	26.5671	31.5456			1	0.225931	0.229213	0.172667	0.377693	1.39132	3.39682		29.4393	6.65124	6.74786	5.0832	11.119	40.9594	100
	28.6788	30.9734	28.2823	28.2391		31.4564			Rorb
Mean	28.5927	30.9662	28.3514	28.0645	26.5345	31.4387		raw	1	0.239772	0.418483	0.342577	1.60424	0.182532	3.78761		26.4019	6.33044	11.0488	9.04467	42.3551	4.81919	100
∆ CT	0	2.37345	-0.241271	-0.528227	-2.0582	2.84602		norm.	1	1.06127	1.82574	1.98403	4.24748	0.131194	10.2497		9.75637	10.3541	17.8126	19.3569	41.44	1.27997	100
fold change	1	0.192983	1.18203	1.44216	4.16465	0.139079
	CKO3 F-1	CKO3 F-2	CKO3 F-3	CKO3 F-4	CKO3 F-5	CKO3 F-6
	28.6745	30.6286	29.8594	30.1573
		30.6922	29.8543	30.1339	27.9238	30.9173
	28.5257				27.9127	31.1905
Mean	28.6001	30.6604	29.8569	30.1456	27.9182	31.0539
∆ CT	0	2.06026	1.25676	1.5455	-0.681893	2.45378
fold change	1	0.239772	0.418483	0.342577	1.60424	0.182532
Rluc	CTs
	WT1 F-1	WT1 F-2	WT1 F-3	WT1 F-4	WT1 F-5	WT1 F-6
			21.1274			21.708
	19.9414	22.3889	21.3117	21.9575	21.3732	21.7896
	20.0576	22.3642	21.2485	21.8514	21.5035
Mean	19.9995	22.3766	21.2292	21.9045	21.4383	21.7488
∆ CT	0	2.37707	1.22973	1.90497	1.43882	1.74933
fold change	1	0.1925	0.426397	0.267022	0.368869	0.29744
	WT2 F-1	WT2 F-2	WT2 F-3	WT2 F-4	WT2 F-5	WT1 F-6
		22.2932	19.7914	20.9381	19.4816
	17.956	22.2633		21.1745	19.6922	18.8729
	18.0892		19.8036	21.0065	19.5614	18.9149
Mean	18.0226	22.2782	19.7975	21.0397	19.5784	18.8939
∆ CT	0	4.25566	1.77491	3.01712	1.55584	0.871328
fold change	1	0.0523504	0.292212	0.123526	0.34013	0.546643
	WT3 F-1	WT3 F-2	WT3 F-3	WT3 F-4	WT3 F-5	WT1 F-6
			20.6124	19.783	19.8766	18.9878
	18.9831	21.5397	20.6131	19.9878		19.3087
	18.9598	21.4952			19.8782
Mean	18.9714	21.5175	20.6127	19.8854	19.8774	19.1483
∆ CT	0	2.54606	1.64133	0.913988	0.905951	0.176846
fold change	1	0.171222	0.32056	0.530716	0.533681	0.884635
	CTs
	CKO1 F-1	CKO1 F-2	CKO1 F-3	CKO1 F-4	CKO1 F-5	CKO1 F-6
			19.86
	16.9891	21.5038		21.6832	20.6775	19.496
	16.9724	21.477	19.8881	21.6158	20.6187	19.467
Mean	16.9807	21.4904	19.8741	21.6495	20.6481	19.4815
∆ CT	0	4.50966	2.89334	4.66877	3.6674	2.50079
fold change	1	0.0438991	0.134591	0.0393152	0.078705	0.17668
	CKO2 F-1	CKO2 F-2	CKO2 F-3	CKO2 F-4	CKO2 F-5	CKO2 F-6
	18.6471	24.0447	20.0069	20.1344	19.6053	20.1169
		23.7946
	18.6748		20.035	20.1304	19.6203	20.1909
Mean	18.6609	23.9197	20.021	20.1324	19.6128	20.1539
∆ CT	0	5.25873	1.36002	1.47147	0.951838	1.49296
fold change	1	0.0261195	0.389576	0.360614	0.516973	0.355284
	CKO3 F-1	CKO3 F-2	CKO3 F-3	CKO3 F-4	CKO3 F-5	CKO3 F-6
	18.5965	20.6817		21.0623		17.9782
		20.7882	20.7245	21.1833	20.0138	18.2467
	18.5813		20.7037		19.9734
Mean	18.5889	20.7349	20.7141	21.1228	19.9936	18.1124
∆ CT	0	2.14605	2.12524	2.53393	1.40471	-0.476452
fold change	1	0.225931	0.229213	0.172667	0.377693	1.39132
