# Supplementary material for: Pum2 and TDP-43 refine area-specific cytoarchitecture post-mitotically and modulate translation of Sox5, Bcl11b, and Rorb mRNAs in developing mouse neocortex
Source: eLife. 2022 Mar 9;11:e55199. doi: 10.7554/eLife.55199 (PMC8906809; doi:10.7554/eLife.55199)
Supplement: Source data 25. — Quantification of polysome profiling from E18.5 neocortices of Pum2 cKO (Figure 9—figure supplement 3b). Histograms showing the distribution of the Sox5, Bcl11b, and Rorb mRNAs at E18.5 across polysome gradient fractions for Pum2 cKO relative to controls. Values were normalized to an RLuc mRNA spike-in control, which was added in an equal amount to the fractions prior to RNA preparation. Data are represented as means ± standard error of the mean (SEM). Two-tailed t-test. [file elife-55199-data25.xlsx]

## Sheet: Sox5
Sox5	CTs																									Normalized % Sox5
	WT1 F-1	WT1 F-2	WT1 F-3	WT1 F-4	WT1 F-5	WT1 F-6		WT1	1	2	3	4	5	6	Total		% in 1/6	% in 2/6	% in 3/6	% in 4/6	% in 5/6	% in 6/6				F1 (0r)	F2 (1 r)	F3 (2&3 r)	F4 (4,5,6 r)	F5 (6-x)	F6 (x-y)	New F4>4)
			24.863	23.4289	22.7655				Rluc																wt1	7.38218	12.0358	16.4327	21.8959	40.5873	1.66611	64.1493
	27.5608	24.8256		23.4703		26.4897			1	3.69141	2.74562	5.53507	4.86096	9.80374	27.6368		3.61836	13.3569	9.93466	20.0279	17.5887	35.4735			wt2	12.4517	11.5725	22.1218	24.4417	14.7775	14.6349	53.854
	27.4127	24.9691	24.8874		22.7277	26.1922			Sox5														100		wt3	11.6716	16.6029	20.9268	0.161579	48.6153	2.02173	50.7986
Mean	27.4868	24.8974	24.8752	23.4496	22.7466	26.341		raw	1	6.01844	6.11173	16.4173	26.7256	2.21265	58.4857		1.70982	10.2904	10.45	28.0706	45.6959	3.78323
∆ CT	0	-2.58939	-2.61158	-4.03715	-4.74015	-1.14577		norm.	1	1.63039	2.22599	2.96605	5.49801	0.225694	13.5461		7.38218	12.0358	16.4327	21.8959	40.5873	1.66611	100		cko1	7.80241	9.87274	25.6731	22.9361	23.5552	10.1605	56.6518
fold change	1	6.01844	6.11173	16.4173	26.7256	2.21265																	100		cko2	5.84775	18.0312	17.3478	21.4236	34.6848	2.6649	58.7732
								WT2	1	2	3	4	5	6	Total		% in 1/6	% in 2/6	% in 3/6	% in 4/6	% in 5/6	% in 6/6			cko3	7.0031	10.4664	23.6122	24.1831	24.6041	10.1312	58.9184
	WT2 F-1	WT2 F-2	WT2 F-3	WT2 F-4	WT2 F-5	WT1 F-6			Rluc
	26.6659	25.3185	23.8404	23.4336	24.9219	25.3151			1	2.50514	3.58365	3.90862	2.34003	2.49206	15.8295		6.31732	15.8258	22.6391	24.692	14.7827	15.7431			Average wt sox5/Rluc	10.5018	13.4037	19.8271	15.4997	34.66	6.10757	56.2673
	26.4903	25.2348	23.8495	23.5968	25.0903	24.8583			Sox5														100		Average cko sox5/Rluc	6.88442	12.7901	22.211	22.8476	27.6147	7.6522	58.1145
	26.4394	25.3845	23.894	23.7461	25.1626	24.7709		raw	1	2.32826	6.36677	7.67231	2.77711	2.929	23.0735		4.33399	10.0907	27.5935	33.2517	12.0359	12.6942			stdevwt	2.72971	2.78022	2.99979	13.3441	17.6805	7.387	6.99489
Mean	26.5319	25.3126	23.8613	23.5922	25.0583	24.9815		norm.	1	0.929393	1.77661	1.96292	1.18678	1.17533	8.03104		12.4517	11.5725	22.1218	24.4417	14.7775	14.6349	100		Stdev cko	0.982719	4.54863	4.33589	1.38191	6.1453	4.31916	1.26879
∆ CT	0	-1.21925	-2.67056	-2.93966	-1.47358	-1.55041																	100		std error wt	1.576	1.60516	1.73193	7.7042	10.2078	4.26489	4.0385
fold change	1	2.32826	6.36677	7.67231	2.77711	2.929		WT3	1	2	3	4	5	6	Total		% in 1/6	% in 2/6	% in 3/6	% in 4/6	% in 5/6	% in 6/6			std erro cko	0.567373	2.62615	2.50333	0.797843	3.54799	2.49367	0.732537
									Rluc
	WT3 F-1	WT3 F-2	WT3 F-3	WT3 F-4	WT3 F-5	WT1 F-6			1	2.1637	2.41417	4.40935	3.6121	7.90204	21.5014		4.65087	10.0631	11.228	20.5073	16.7994	36.7514			T-Test	0.0969295	0.851698	0.477319	0.396505	0.550008	0.770167	0.675992
	25.8776	24.7866	24.3078	26.4816	22.7435	26.0901			Sox5														100
	26.7743	25.0743	24.4594	37.6188	22.6014	26.0647		raw	1	3.07786	4.32852	0.0610416	15.0453	1.36877	24.8815		4.01905	12.3701	17.3966	0.24533	60.4678	5.50115
	27.1333	25.0586	24.6764	27.787	22.7066	26.2718		norm.	1	1.4225	1.79296	0.0138437	4.16525	0.173217	8.56777		11.6716	16.6029	20.9268	0.161579	48.6153	2.02173	100
Mean	26.5951	24.9732	24.4812	30.6291	22.6838	26.1422																	100
∆ CT	0	-1.62193	-2.11387	4.03406	-3.91124	-0.452878
fold change	1	3.07786	4.32852	0.0610416	15.0453	1.36877		cko1	1	2	3	4	5	6	Total		% in 1/6	% in 2/6	% in 3/6	% in 4/6	% in 5/6	% in 6/6
									Rluc
									1	3.41083	2.42394	4.13302	4.13338	5.43618	20.5373		4.86918	16.6079	11.8026	20.1244	20.1262	26.4697	100
									Sox5
								raw	1	4.31588	7.97573	12.1495	12.4785	7.07915	44.9987		2.22228	9.59111	17.7243	26.9996	27.7308	15.7319	100
	CTs							norm.	1	1.26535	3.2904	2.93961	3.01896	1.30223	12.8166		7.80241	9.87274	25.6731	22.9361	23.5552	10.1605	100
	cko1 F-1	cko1 F-2	cko1 F-3	cko1 F-4	cko1 F-5	cko1 F-6
			25.1763					cko2	1	2	3	4	5	6	Total		% in 1/6	% in 2/6	% in 3/6	% in 4/6	% in 5/6	% in 6/6
	28.18	26.0997	25.2748	24.6871	24.5685	25.5586			Rluc
	28.2623	26.1232		24.5495	24.5911	25.2365			1	1.33841	2.61352	3.92109	1.21706	3.78925	13.8793		7.20496	9.64318	18.8303	28.2513	8.76888	27.3014	100
Mean	28.2211	26.1115	25.2255	24.6183	24.5798	25.3976			Sox5
∆ CT	0	-2.10965	-2.99562	-3.60282	-3.64137	-2.82358		raw	1	4.12691	7.75321	14.3651	7.21876	1.72681	36.1908		2.76313	11.4032	21.4231	39.6927	19.9464	4.77141	100
fold change	1	4.31588	7.97573	12.1495	12.4785	7.07915		norm.	1	3.08345	2.96658	3.66356	5.9313	0.455713	17.1006		5.84775	18.0312	17.3478	21.4236	34.6848	2.6649	100
	cko2 CxB-1	cko2 CxB-2	cko2 CxB-3	cko2 F-4	cko2 F-5	cko2 F-6		cko3	1	2	3	4	5	6	Total		% in 1/6	% in 2/6	% in 3/6	% in 4/6	% in 5/6	% in 6/6
	27.2728	25.2533							Rluc
		25.2709	24.3729	23.436	24.5267	26.5346			1	2.4809	1.26692	2.86899	2.46011	5.06344	15.1404		6.60487	16.386	8.36787	18.9493	16.2487	33.4433	100
	27.3414		24.3318	23.4893	24.3841	26.5035			Sox5
Mean	27.3071	25.2621	24.3523	23.4626	24.4554	26.519		raw	1	3.70779	4.27165	9.90719	8.64313	7.32512	34.8549		2.86904	10.6378	12.2555	28.4241	24.7975	21.0161	100
∆ CT	0	-2.04506	-2.95479	-3.8445	-2.85175	-0.788112		norm.	1	1.49454	3.37167	3.4532	3.51331	1.44667	14.2794		7.0031	10.4664	23.6122	24.1831	24.6041	10.1312	100
fold change	1	4.12691	7.75321	14.3651	7.21876	1.72681
	cko3 F-1	cko3 F-2	cko3 F-3	cko3 F-4	cko3 F-5	cko3 F-6
	27.8257	26.1116	25.7141	24.3707	24.6644
		25.9802				25.1795
	27.8306	25.7211	25.7527	24.6686	24.7688	24.7311
Mean	27.8282	25.9376	25.7334	24.5197	24.7166	24.9553
∆ CT	0	-1.89056	-2.09479	-3.30848	-3.11155	-2.87285
fold change	1	3.70779	4.27165	9.90719	8.64313	7.32512
Rluc	CTs
	WT1 F-1	WT1 F-2	WT1 F-3	WT1 F-4	WT1 F-5	WT1 F-6
		18.2222			17.8623	16.7004
	20.0663		18.6345	17.6812		16.8072
	20.1604	18.2362	18.6779	17.6083	17.802	16.9525
Mean	20.1134	18.2292	18.6562	17.6448	17.8321	16.82
∆ CT	0	-1.88417	-1.45713	-2.4686	-2.28124	-3.29333
fold change	1	3.69141	2.74562	5.53507	4.86096	9.80374
	WT2 F-1	WT2 F-2	WT2 F-3	WT2 F-4	WT2 F-5	WT1 F-6
	19.3878		17.5479		18.1288	18.0427
	19.3631	18.038	17.5201	17.3467	18.1238	18.0735
		18.0631		17.4709	18.1941
Mean	19.3754	18.0506	17.534	17.4088	18.1489	18.0581
∆ CT	0	-1.32489	-1.84143	-1.96666	-1.22652	-1.31734
fold change	1	2.50514	3.58365	3.90862	2.34003	2.49206
	WT3 F-1	WT3 F-2	WT3 F-3	WT3 F-4	WT3 F-5	WT1 F-6
	19.3863	18.3011		17.9533		16.4858
	19.442	18.3003	18.1557	16.572	17.5855	16.3781
			18.1296	17.2955	17.5372
Mean	19.4142	18.3007	18.1427	17.2736	17.5613	16.432
∆ CT	0	-1.1135	-1.27153	-2.14057	-1.85284	-2.98223
fold change	1	2.1637	2.41417	4.40935	3.6121	7.90204
	CTs
	cko1 F-1	cko1 F-2	cko1 F-3	cko1 F-4	cko1 F-5	cko1 F-6
	19.9137	18.1453	18.7378		17.8285
		18.2622		17.9626	17.989	17.5591
	20.1049	18.31	18.7261	17.9616	18.0684	17.5742
Mean	20.0093	18.2392	18.7319	17.9621	17.962	17.5667
∆ CT	0	-1.77012	-1.27735	-2.0472	-2.04732	-2.44259
fold change	1	3.41083	2.42394	4.13302	4.13338	5.43618
	cko2 CxB-1	cko2 CxB-2	cko2 CxB-3	cko2 F-4	cko2 F-5	cko2 F-6
	18.868	18.3292	17.463		18.485	16.8518
	18.7486	18.362	17.2801	16.7483		16.8366
	18.6818		17.3973	16.8415	18.4805
Mean	18.7662	18.3456	17.3802	16.7949	18.4828	16.8442
∆ CT	0	-0.42052	-1.386	-1.97125	-0.283402	-1.92191
fold change	1	1.33841	2.61352	3.92109	1.21706	3.78925
	cko3 F-1	cko3 F-2	cko3 F-3	cko3 F-4	cko3 F-5	cko3 F-6
	19.5065	18.0283	19.1008	17.9255	18.1291	17.1096
			19.1421	17.8044
	19.4191	18.2756		18.0968	18.1991	17.1358
Mean	19.4628	18.1519	19.1215	17.9422	18.1641	17.1227
∆ CT	0	-1.31086	-0.341331	-1.52054	-1.29872	-2.34012
fold change	1	2.4809	1.26692	2.86899	2.46011	5.06344

## Sheet: Ctip2
ctip2	CTs																									Normalized % ctip2
	WT1 F-1	WT1 F-2	WT1 F-3	WT1 F-4	WT1 F-5	WT1 F-6		WT1	1	2	3	4	5	6	Total		% in 1/6	% in 2/6	% in 3/6	% in 4/6	% in 5/6	% in 6/6				F1 (0r)	F2 (1 r)	F3 (2&3 r)	F4 (4,5,6 r)	F5 (6-x)	F6 (x-y)	New F4>4)
	28.3169		25.3229	23.5655	22.8713	23.1287			Rluc																wt1	3.24232	3.24072	4.69914	11.3252	64.5869	12.9056	88.8178
	27.9458	26.2912	25.0235			23.106			1	3.65996	4.82832	7.08809	2.00025	8.18669	26.7633		3.73646	13.6753	18.0408	26.4844	7.47385	30.5892			wt2	3.33498	3.48874	8.59955	12.6387	37.0573	34.8808	84.5767
	28.1679	26.2536	25.6635	23.4619	22.7831				ctip2														100		wt3	1.15859	5.21314	12.95	24.5347	54.9266	1.21699	80.6783
Mean	28.1435	26.2724	25.3366	23.5137	22.8272	23.1174		raw	1	3.65815	6.99776	24.7583	39.845	32.5861	108.845		0.918735	3.36087	6.42908	22.7463	36.607	29.938
∆ CT	0	-1.87111	-2.80689	-4.62984	-5.31633	-5.02619		norm.	1	0.999507	1.44931	3.49295	19.92	3.98038	30.8421		3.24232	3.24072	4.69914	11.3252	64.5869	12.9056	100		cko1	2.22869	2.95238	12.7825	12.8642	66.0072	3.16506	82.0364
fold change	1	3.65815	6.99776	24.7583	39.845	32.5861																	100		cko2	1.7495	5.04779	9.01796	11.2093	70.705	2.27047	84.1848
								WT2	1	2	3	4	5	6	Total		% in 1/6	% in 2/6	% in 3/6	% in 4/6	% in 5/6	% in 6/6			cko3	1.39394	2.42201	11.1564	14.3207	67.2774	3.42962	85.0277
	WT2 F-1	WT2 F-2	WT2 F-3	WT2 F-4	WT2 F-5	WT1 F-6			Rluc
	27.8558	26.2521	24.534	24.0271	22.9973	23.0798			1	2.50514	3.58365	3.90862	2.34003	2.49206	15.8295		6.31732	15.8258	22.6391	24.692	14.7827	15.7431			Average wt ctip2/Rluc	2.57863	3.98087	8.74956	16.1662	52.1903	16.3345	84.6909
		26.349			22.8834				ctip2														100		Average cko ctip2/Rluc	1.79071	3.47406	10.9856	12.798	67.9965	2.95505	83.7496
	27.5251		24.4309	23.5763	23.0891	22.8931		raw	1	2.62064	9.24077	14.8126	26.0016	26.0646	79.7402		1.25407	3.28647	11.5886	18.5761	32.6079	32.6868			stdevwt	1.23066	1.07436	4.12747	7.27704	13.9673	17.0918	4.07097
Mean	27.6905	26.3005	24.4824	23.8017	22.9899	22.9864		norm.	1	1.0461	2.57859	3.78973	11.1117	10.459	29.9851		3.33498	3.48874	8.59955	12.6387	37.0573	34.8808	100		Stdev cko	0.4189	1.38845	1.88808	1.55672	2.43005	0.607441	1.54239
∆ CT	0	-1.38992	-3.20801	-3.88875	-4.70053	-4.70402																	100		std error wt	0.710524	0.620284	2.38299	4.2014	8.06404	9.86796	2.35038
fold change	1	2.62064	9.24077	14.8126	26.0016	26.0646		WT3	1	2	3	4	5	6	Total		% in 1/6	% in 2/6	% in 3/6	% in 4/6	% in 5/6	% in 6/6			std erro cko	0.241852	0.80162	1.09009	0.898775	1.40299	0.350706	0.8905
									Rluc
	WT3 F-1	WT3 F-2	WT3 F-3	WT3 F-4	WT3 F-5	WT1 F-6			1	2.1637	2.41417	4.40935	3.6121	7.90204	21.5014		4.65087	10.0631	11.228	20.5073	16.7994	36.7514			T-Test	0.353057	0.64332	0.441578	0.476895	0.125659	0.246892	0.727024
	29.7147	26.4624		23.1871	22.2907	26.7271			ctip2														100
		26.5566	25.1044	23.5315				raw	1	9.73571	26.9841	93.3741	171.243	8.30038	310.637		0.321919	3.13411	8.68669	30.0589	55.1263	2.67205
	29.7756	26.3665	24.8778	22.8819	22.3597	26.6567		norm.	1	4.49956	11.1774	21.1764	47.4082	1.05041	86.3119		1.15859	5.21314	12.95	24.5347	54.9266	1.21699	100
Mean	29.7451	26.4618	24.9911	23.2002	22.3252	26.6919																	100
∆ CT	0	-3.28329	-4.75404	-6.54495	-7.4199	-3.05318
fold change	1	9.73571	26.9841	93.3741	171.243	8.30038		cko1	1	2	3	4	5	6	Total		% in 1/6	% in 2/6	% in 3/6	% in 4/6	% in 5/6	% in 6/6
									Rluc
									1	3.41083	2.42394	4.13302	4.13338	5.43618	20.5373		4.86918	16.6079	11.8026	20.1244	20.1262	26.4697	100
									ctip2
								raw	1	4.51838	13.9024	23.8561	122.418	7.72017	173.415		0.57665	2.60553	8.0168	13.7566	70.5926	4.45184	100
	CTs							norm.	1	1.32472	5.73544	5.77207	29.617	1.42015	44.8694		2.22869	2.95238	12.7825	12.8642	66.0072	3.16506	100
	cko1 F-1	cko1 F-2	cko1 F-3	cko1 F-4	cko1 F-5	cko1 F-6
	28.871	26.6304	25.09		22.005	26.0104		cko2	1	2	3	4	5	6	Total		% in 1/6	% in 2/6	% in 3/6	% in 4/6	% in 5/6	% in 6/6
		26.9996		24.4008		26.047			Rluc
	29.1106		25.2971	24.4283	22.1052	26.0691			1	1.33841	2.61352	3.92109	1.21706	3.78925	13.8793		7.20496	9.64318	18.8303	28.2513	8.76888	27.3014	100
Mean	28.9908	26.815	25.1935	24.4145	22.0551	26.0422			ctip2
∆ CT	0	-2.17581	-3.79726	-4.57628	-6.93568	-2.94863		raw	1	3.86167	13.4716	25.123	49.1867	4.91762	97.5606		1.025	3.95823	13.8085	25.7511	50.4166	5.04058	100
fold change	1	4.51838	13.9024	23.8561	122.418	7.72017		norm.	1	2.88527	5.15458	6.40715	40.4143	1.29778	57.1591		1.7495	5.04779	9.01796	11.2093	70.705	2.27047	100
	cko2 CxB-1	cko2 CxB-2	cko2 CxB-3	cko2 F-4	cko2 F-5	cko2 F-6		cko3	1	2	3	4	5	6	Total		% in 1/6	% in 2/6	% in 3/6	% in 4/6	% in 5/6	% in 6/6
	28.4047	26.539		23.8884	22.8142	26.2571			Rluc
	28.47	26.4371	24.6864	23.6843	22.7073				1	2.4809	1.26692	2.86899	2.46011	5.06344	15.1404		6.60487	16.386	8.36787	18.9493	16.2487	33.4433	100
			24.6846		22.9299	26.0216			ctip2
Mean	28.4373	26.4881	24.6855	23.7864	22.8171	26.1394		raw	1	4.31065	10.1398	29.4747	118.736	12.458	176.119		0.567799	2.44758	5.75738	16.7357	67.4179	7.07364	100
∆ CT	0	-1.94923	-3.75185	-4.65094	-5.6202	-2.29796		norm.	1	1.73754	8.0035	10.2736	48.2644	2.46039	71.7394		1.39394	2.42201	11.1564	14.3207	67.2774	3.42962	100
fold change	1	3.86167	13.4716	25.123	49.1867	4.91762
	cko3 F-1	cko3 F-2	cko3 F-3	cko3 F-4	cko3 F-5	cko3 F-6
	28.9621	27.0956	25.7112	24.1219	22.258	25.6479
	29.4903	27.2056	26.1292	24.4948	22.4337	25.7389
	28.8315	26.6589	25.4177	24.023	21.9173	24.9801
Mean	29.0946	26.9867	25.7527	24.2132	22.203	25.4556
∆ CT	0	-2.1079	-3.34196	-4.8814	-6.89161	-3.639
fold change	1	4.31065	10.1398	29.4747	118.736	12.458
Rluc	CTs
	WT1 F-1	WT1 F-2	WT1 F-3	WT1 F-4	WT1 F-5	WT1 F-6
		17.8926	17.5123
	19.8186	17.983	17.4746	16.9747	18.8095	16.771
	19.8006		17.6274	16.9938	18.8093	16.7817
Mean	19.8096	17.9378	17.5381	16.9842	18.8094	16.7763
∆ CT	0	-1.87183	-2.27152	-2.8254	-1.00018	-3.03328
fold change	1	3.65996	4.82832	7.08809	2.00025	8.18669
	WT2 F-1	WT2 F-2	WT2 F-3	WT2 F-4	WT2 F-5	WT1 F-6
	19.3878		17.5479		18.1288	18.0427
	19.3631	18.038	17.5201	17.3467	18.1238	18.0735
		18.0631		17.4709	18.1941
Mean	19.3754	18.0506	17.534	17.4088	18.1489	18.0581
∆ CT	0	-1.32489	-1.84143	-1.96666	-1.22652	-1.31734
fold change	1	2.50514	3.58365	3.90862	2.34003	2.49206
	WT3 F-1	WT3 F-2	WT3 F-3	WT3 F-4	WT3 F-5	WT1 F-6
	19.3863	18.3011		17.9533		16.4858
	19.442	18.3003	18.1557	16.572	17.5855	16.3781
			18.1296	17.2955	17.5372
Mean	19.4142	18.3007	18.1427	17.2736	17.5613	16.432
∆ CT	0	-1.1135	-1.27153	-2.14057	-1.85284	-2.98223
fold change	1	2.1637	2.41417	4.40935	3.6121	7.90204
	CTs
	cko1 F-1	cko1 F-2	cko1 F-3	cko1 F-4	cko1 F-5	cko1 F-6
	19.9137	18.1453	18.7378		17.8285
		18.2622		17.9626	17.989	17.5591
	20.1049	18.31	18.7261	17.9616	18.0684	17.5742
Mean	20.0093	18.2392	18.7319	17.9621	17.962	17.5667
∆ CT	0	-1.77012	-1.27735	-2.0472	-2.04732	-2.44259
fold change	1	3.41083	2.42394	4.13302	4.13338	5.43618
	cko2 CxB-1	cko2 CxB-2	cko2 CxB-3	cko2 F-4	cko2 F-5	cko2 F-6
	18.868	18.3292	17.463		18.485	16.8518
	18.7486	18.362	17.2801	16.7483		16.8366
	18.6818		17.3973	16.8415	18.4805
Mean	18.7662	18.3456	17.3802	16.7949	18.4828	16.8442
∆ CT	0	-0.42052	-1.386	-1.97125	-0.283402	-1.92191
fold change	1	1.33841	2.61352	3.92109	1.21706	3.78925
	cko3 F-1	cko3 F-2	cko3 F-3	cko3 F-4	cko3 F-5	cko3 F-6
	19.5065	18.0283	19.1008	17.9255	18.1291	17.1096
			19.1421	17.8044
	19.4191	18.2756		18.0968	18.1991	17.1358
Mean	19.4628	18.1519	19.1215	17.9422	18.1641	17.1227
∆ CT	0	-1.31086	-0.341331	-1.52054	-1.29872	-2.34012
fold change	1	2.4809	1.26692	2.86899	2.46011	5.06344

## Sheet: Rorb
rorb	CTs																									Normalized % rorb
	WT1 F-1	WT1 F-2	WT1 F-3	WT1 F-4	WT1 F-5	WT1 F-6		WT1	1	2	3	4	5	6	Total		% in 1/6	% in 2/6	% in 3/6	% in 4/6	% in 5/6	% in 6/6				F1 (0r)	F2 (1 r)	F3 (2&3 r)	F4 (4,5,6 r)	F5 (6-x)	F6 (x-y)	New F4>4)
			25.9856	25.1331		26.1891			Rluc																wt1	8.44977	5.47123	7.18977	7.27946	67.9331	3.67668	78.8892
	27.9716	26.7221	26.0169	25.6596	23.9549				1	3.65996	4.82832	7.08809	2.00025	8.18669	26.7633		3.73646	13.6753	18.0408	26.4844	7.47385	30.5892			wt2	9.17894	8.7461	17.1338	9.433	45.0386	10.4696	64.9412
	27.9655	26.7254	25.7874	25.2819	23.9676	26.0824			rorb														100		wt3	4.19592	16.218	15.8085	25.3495	38.0634	0.364691	63.7776
Mean	27.9686	26.7238	25.93	25.3582	23.9612	26.1358		raw	1	2.36982	4.10834	6.10637	16.0813	3.56221	33.228		3.00951	7.132	12.3641	18.3772	48.3967	10.7205
∆ CT	0	-1.24478	-2.03855	-2.61032	-4.00731	-1.83277		norm.	1	0.647501	0.850883	0.861497	8.03963	0.435122	11.8346		8.44977	5.47123	7.18977	7.27946	67.9331	3.67668	100		cko1	4.52762	9.67913	14.81	17.5541	50.6682	2.76093	70.9832
fold change	1	2.36982	4.10834	6.10637	16.0813	3.56221																	100		cko2	4.64683	11.7253	11.5428	10.0821	61.2842	0.718676	72.085
								WT2	1	2	3	4	5	6	Total		% in 1/6	% in 2/6	% in 3/6	% in 4/6	% in 5/6	% in 6/6			cko3	4.25884	9.33302	16.9625	14.6888	53.5057	1.25112	69.4456
	WT2 F-1	WT2 F-2	WT2 F-3	WT2 F-4	WT2 F-5	WT1 F-6			Rluc
			24.6265		23.9549	25.9511			1	2.50514	3.58365	3.90862	2.34003	2.49206	15.8295		6.31732	15.8258	22.6391	24.692	14.7827	15.7431			Average wt rorb/Rluc	7.27488	10.1451	13.3773	14.0207	50.345	4.83697	69.2027
	27.4018	26.1788	24.8151	25.4996		25.9934			rorb														100		Average cko rorb/Rluc	4.47776	10.2458	14.4385	14.1083	55.1527	1.57691	70.8379
	27.557	26.2696	24.7711	25.4471	23.9614			raw	1	2.38701	6.68939	4.0168	11.4819	2.84246	28.4176		3.51895	8.39978	23.5396	14.1349	40.4042	10.0025			stdevwt	2.69127	5.50827	5.39941	9.87001	15.6259	5.15139	8.40894
Mean	27.4794	26.2242	24.7375	25.4734	23.9581	25.9723		norm.	1	0.952844	1.86664	1.02768	4.90674	1.14061	10.8945		9.17894	8.7461	17.1338	9.433	45.0386	10.4696	100		Stdev cko	0.19874	1.29292	2.72889	3.76968	5.49633	1.05939	1.32569
∆ CT	0	-1.25521	-2.74187	-2.00605	-3.52129	-1.50714																	100		std error wt	1.5538	3.1802	3.11735	5.69845	9.0216	2.97415	4.8549
fold change	1	2.38701	6.68939	4.0168	11.4819	2.84246		WT3	1	2	3	4	5	6	Total		% in 1/6	% in 2/6	% in 3/6	% in 4/6	% in 5/6	% in 6/6			std erro cko	0.114743	0.746465	1.57552	2.17643	3.17331	0.611638	0.765388
									Rluc
	WT3 F-1	WT3 F-2	WT3 F-3	WT3 F-4	WT3 F-5	WT1 F-6			1	2.1637	2.41417	4.40935	3.6121	7.90204	21.5014		4.65087	10.0631	11.228	20.5073	16.7994	36.7514			T-Test	0.147043	0.976879	0.776428	0.989222	0.641583	0.343428	0.756055
		25.8799		24.0817					rorb														100
	29.2249	26.1642	25.8433	24.6067	24.1375	29.5083		raw	1	8.3631	9.09559	26.639	32.7673	0.686812	78.5518		1.27305	10.6466	11.5791	33.9127	41.7142	0.874343
	28.9473		25.9585	24.3635	23.9663	29.7479		norm.	1	3.86518	3.76758	6.04148	9.07154	0.0869157	23.8327		4.19592	16.218	15.8085	25.3495	38.0634	0.364691	100
Mean	29.0861	26.0221	25.9009	24.3506	24.0519	29.6281																	100
∆ CT	0	-3.06404	-3.18517	-4.73547	-5.03418	0.542013
fold change	1	8.3631	9.09559	26.639	32.7673	0.686812		cko1	1	2	3	4	5	6	Total		% in 1/6	% in 2/6	% in 3/6	% in 4/6	% in 5/6	% in 6/6
									Rluc
									1	3.41083	2.42394	4.13302	4.13338	5.43618	20.5373		4.86918	16.6079	11.8026	20.1244	20.1262	26.4697	100
									rorb
								raw	1	7.29167	7.9288	16.0242	46.2563	3.31497	81.8159		1.22226	8.91228	9.69102	19.5857	56.537	4.05174	100
	CTs							norm.	1	2.1378	3.27104	3.87713	11.1909	0.609798	22.0867		4.52762	9.67913	14.81	17.5541	50.6682	2.76093	100
	cko1 F-1	cko1 F-2	cko1 F-3	cko1 F-4	cko1 F-5	cko1 F-6
	29.2597	26.6805	26.3851	25.2484	24.0953	27.9386		cko2	1	2	3	4	5	6	Total		% in 1/6	% in 2/6	% in 3/6	% in 4/6	% in 5/6	% in 6/6
	29.4974	26.5091		25.6392					Rluc
	29.6261		26.5628	25.4891	23.7637	27.5255			1	1.33841	2.61352	3.92109	1.21706	3.78925	13.8793		7.20496	9.64318	18.8303	28.2513	8.76888	27.3014	100
Mean	29.4611	26.5948	26.474	25.4589	23.9295	27.7321			rorb
∆ CT	0	-2.86625	-2.9871	-4.00218	-5.53158	-1.729		raw	1	3.37721	6.49206	8.50748	16.0511	0.586044	36.0139		2.77671	9.37751	18.0265	23.6228	44.5692	1.62727	100
fold change	1	7.29167	7.9288	16.0242	46.2563	3.31497		norm.	1	2.5233	2.48403	2.16967	13.1884	0.15466	21.5201		4.64683	11.7253	11.5428	10.0821	61.2842	0.718676	100
	cko2 CxB-1	cko2 CxB-2	cko2 CxB-3	cko2 F-4	cko2 F-5	cko2 F-6		cko3	1	2	3	4	5	6	Total		% in 1/6	% in 2/6	% in 3/6	% in 4/6	% in 5/6	% in 6/6
	28.5143				24.6107				Rluc
		26.9213	25.9798	25.4949	24.9488	29.1676			1	2.4809	1.26692	2.86899	2.46011	5.06344	15.1404		6.60487	16.386	8.36787	18.9493	16.2487	33.4433	100
	28.7924	26.8737	25.9295	25.6343	24.3867	29.6809			rorb
Mean	28.6533	26.8975	25.9547	25.5646	24.6487	29.4243		raw	1	5.43676	5.04604	9.89515	30.9075	1.48748	53.7729		1.85967	10.1106	9.38398	18.4017	57.4778	2.76623	100
∆ CT	0	-1.75583	-2.69868	-3.08873	-4.0046	0.770919		norm.	1	2.19145	3.9829	3.449	12.5635	0.29377	23.4806		4.25884	9.33302	16.9625	14.6888	53.5057	1.25112	100
fold change	1	3.37721	6.49206	8.50748	16.0511	0.586044
	cko3 F-1	cko3 F-2	cko3 F-3	cko3 F-4	cko3 F-5	cko3 F-6
	28.981	27.0625
	29.9869		27.1677	26.2766	24.5755	29.1123
	29.4909	27.0245	27.1345	26.0824	24.4972	28.7145
Mean	29.4862	27.0435	27.1511	26.1795	24.5364	28.9134
∆ CT	0	-2.44275	-2.33515	-3.30672	-4.94988	-0.572873
fold change	1	5.43676	5.04604	9.89515	30.9075	1.48748
Rluc	CTs
	WT1 F-1	WT1 F-2	WT1 F-3	WT1 F-4	WT1 F-5	WT1 F-6
		17.8926	17.5123
	19.8186	17.983	17.4746	16.9747	18.8095	16.771
	19.8006		17.6274	16.9938	18.8093	16.7817
Mean	19.8096	17.9378	17.5381	16.9842	18.8094	16.7763
∆ CT	0	-1.87183	-2.27152	-2.8254	-1.00018	-3.03328
fold change	1	3.65996	4.82832	7.08809	2.00025	8.18669
	WT2 F-1	WT2 F-2	WT2 F-3	WT2 F-4	WT2 F-5	WT1 F-6
	19.3878		17.5479		18.1288	18.0427
	19.3631	18.038	17.5201	17.3467	18.1238	18.0735
		18.0631		17.4709	18.1941
Mean	19.3754	18.0506	17.534	17.4088	18.1489	18.0581
∆ CT	0	-1.32489	-1.84143	-1.96666	-1.22652	-1.31734
fold change	1	2.50514	3.58365	3.90862	2.34003	2.49206
	WT3 F-1	WT3 F-2	WT3 F-3	WT3 F-4	WT3 F-5	WT1 F-6
	19.3863	18.3011		17.9533		16.4858
	19.442	18.3003	18.1557	16.572	17.5855	16.3781
			18.1296	17.2955	17.5372
Mean	19.4142	18.3007	18.1427	17.2736	17.5613	16.432
∆ CT	0	-1.1135	-1.27153	-2.14057	-1.85284	-2.98223
fold change	1	2.1637	2.41417	4.40935	3.6121	7.90204
	CTs
	cko1 F-1	cko1 F-2	cko1 F-3	cko1 F-4	cko1 F-5	cko1 F-6
	19.9137	18.1453	18.7378		17.8285
		18.2622		17.9626	17.989	17.5591
	20.1049	18.31	18.7261	17.9616	18.0684	17.5742
Mean	20.0093	18.2392	18.7319	17.9621	17.962	17.5667
∆ CT	0	-1.77012	-1.27735	-2.0472	-2.04732	-2.44259
fold change	1	3.41083	2.42394	4.13302	4.13338	5.43618
	cko2 CxB-1	cko2 CxB-2	cko2 CxB-3	cko2 F-4	cko2 F-5	cko2 F-6
	18.868	18.3292	17.463		18.485	16.8518
	18.7486	18.362	17.2801	16.7483		16.8366
	18.6818		17.3973	16.8415	18.4805
Mean	18.7662	18.3456	17.3802	16.7949	18.4828	16.8442
∆ CT	0	-0.42052	-1.386	-1.97125	-0.283402	-1.92191
fold change	1	1.33841	2.61352	3.92109	1.21706	3.78925
	cko3 F-1	cko3 F-2	cko3 F-3	cko3 F-4	cko3 F-5	cko3 F-6
	19.5065	18.0283	19.1008	17.9255	18.1291	17.1096
			19.1421	17.8044
	19.4191	18.2756		18.0968	18.1991	17.1358
Mean	19.4628	18.1519	19.1215	17.9422	18.1641	17.1227
∆ CT	0	-1.31086	-0.341331	-1.52054	-1.29872	-2.34012
fold change	1	2.4809	1.26692	2.86899	2.46011	5.06344
