# Supplementary material for: Pum2 and TDP-43 refine area-specific cytoarchitecture post-mitotically and modulate translation of Sox5, Bcl11b, and Rorb mRNAs in developing mouse neocortex
Source: eLife. 2022 Mar 9;11:e55199. doi: 10.7554/eLife.55199 (PMC8906809; doi:10.7554/eLife.55199)
Supplement: Source data 26. — Quantification of results from UV cross-linking immunoprecipitation (UV-CLIP) from E18.5 cortices (Figure 10c). Dissociated cells were either cross-linked with UV light or left untreated as a control. Lysates were used for immunoprecipitations with antibodies against TDP-43, Pum2, or control nonspecific IgG. RNA in the input and IP eluate were analyzed by qRT-PCR for Sox5, Bcl11b, Rorb, Fezf2, Cux1, Pum2, Tdp43, and 18S mRNAs. After verifying enrichment relative to IgG controls for UV-treated samples, histograms were generated that represent the fraction of input mRNA co-immunoprecipitated with either Pum2 or TDP-43 in the presence or absence of UV cross-linking. Statistically significant enrichment was evaluated relative to 18S rRNA, which is not known to interact significantly with either protein. Reduced signal in the absence of UV-cross-linking implies an interaction is cross-linking-dependent, that is, direct. Data are represented as means ± standard error of the mean (SEM) from n = 3–6 samples. Raw values and data normalized to 18S of each replicate are shown independently in different sheets, and a summary of consolidated results from six replicates is in the last Excel sheet. *p≤0.05, ** p≤0.01, Mann–Whitney U test. [file elife-55199-data26.xlsx]

## Sheet: Rep 1 raw values
Sox5
UV treated- without RNaseI
	Input Pum2	Pum2 IP	Input TDP	TDP IP	Input IgG	IgG IP
	26.3269	33.0042	26.8607	23.419	26.7714	36.5335
	26.1884	31.732489*	26.8536	23.5387	26.74	Undetermined
	26.2126	32.6662	26.7332	23.37	26.9727	Undetermined
Mean	26.2426	32.8352	26.8158	23.4425	26.8281	36.5335
Non UV- without RNaseI
	Input Pum2	Pum2 IP	Input TDP	TDP IP	Input IgG	IgG IP
	22.9125	32.5627	23.3775	25.9951	23.3313	Undetermined
	22.8042	32.535	23.2145	25.8458	23.3387	38.6159
	22.8261	33.35762*	23.2762	25.9907	23.1825	Undetermined
Mean	22.8476	32.5488	23.2894	25.9439	23.2841	38.6159
TDP43
UV treated- without RNaseI
	Input Pum2	Pum2 IP	Input TDP	TDP IP	Input IgG	IgG IP
	26.6141	34.3982	27.8222	24.8397	27.6952	37.3811
	26.5266	36.1178	27.8806	24.9758	27.9152	36.583893*
	26.6455	35.6079	28.0416	24.873	27.776	37.3864
Mean	26.5954	35.3746	27.9148	24.8962	27.7955	37.3837
Non UV- without RNaseI
	Input Pum2	Pum2 IP	Input TDP	TDP IP	Input IgG	IgG IP
	23.5236	34.4082	23.9101	30.0071	23.7144	36.5165
	23.5268	33.2125	23.9494	30.2794	23.681	Undetermined
	23.4879	35.0024	23.9087	30.3256	23.7012	Undetermined
Mean	23.5128	34.2077	23.9228	30.204	23.6989	36.5165
Rorb
UV treated- without RNaseI
	Input Pum2	Pum2 IP	Input TDP	TDP IP	Input IgG	IgG IP
	28.6201	31.95152*	29.6791	28.0273	28.8889	Undetermined
	28.7061	32.9536	29.3644	28.0099	29.2769	Undetermined
	28.7928	33.3738	29.4606	28.1725	29.5103	Undetermined
Mean	28.7063	33.1637	29.5014	28.0699	29.2254	Undetermined
Non UV- without RNaseI
	Input Pum2	Pum2 IP	Input TDP	TDP IP	Input IgG	IgG IP
	24.906	32.633003*	25.1842	30.184204*	25.2552	34.6445
	24.8765	34.6634	25.4543	30.6206	25.0842	31.0841
	24.9729	34.683	25.2862	30.8103	25.1201	Undetermined
Mean	24.9185	34.6732	25.3083	30.7154	25.1531	32.8643
Ctip2
UV treated- without RNaseI
	Input Pum2	Pum2 IP	Input TDP	TDP IP	Input IgG	IgG IP
	26.7926	33.035	28.1525	26.9635	28.3896	34.8785
	26.7698	33.9054*	27.8901	26.8202	28.0145	35.8978
	27.2868	32.6001	28.1084	27.1588	28.2364	38.044
Mean	26.9497	32.8175	28.0503	26.9809	28.2135	36.2734
Non UV- without RNaseI
	Input Pum2	Pum2 IP	Input TDP	TDP IP	Input IgG	IgG IP
	21.6585	30.8688	22.2467	28.7238	21.9837	37.8555
	21.657	30.4942	22.2012	29.0162	22.1712	35.9669
	21.5492	32.361195*	22.2101	28.5762	22.0735	38.453
Mean	21.6216	30.6815	22.2193	28.7721	22.0761	37.4251
18s rRNA
UV treated- without RNaseI
		Input	TDP IP	Pum2 IP	IgG IP
		6.2868	13.8058	20.0633	23.2338
		6.37296	13.8289	19.836	23.1376
		6.5126	13.9141	19.92	23.1797
Mean		6.39079	13.8496	19.9398	23.1837
Non UV- without RNaseI
		Input	TDP IP	Pum2 IP	IgG IP
		5.52552	17.5037	18.2758	27.2532
		5.44444	17.5406	18.1299	27.207
		5.22105	17.4357	18.1067	27.2139
Mean		5.397	17.4933	18.1708	27.2247
Pum2
UV treated- without RNaseI
		Input	TDP IP	Pum2 IP	IgG IP
		30.1411	31.065	33.7168	37.7491
		30.7845	31.6529	33.1836	Undetermined
		30.387	31.2997	32.5941	Undetermined
Mean		30.4375	31.3392	33.1648	37.7491
Non UV- without RNaseI
		Input	TDP IP	Pum2 IP	IgG IP
		27.6899	32.6784	34.1472	35.8403
		27.7424	38.7956	32.3253	Undetermined
		27.6835	34.0057	33.739	33.6698
Mean		27.7053	35.1599	33.4038	34.7551
Cux1
UV treated- without RNaseI
		Input	TDP IP	Pum2 IP	IgG IP
		29.8213	39.0689	Undetermined	Undetermined
		30.9272	Undetermined	37.521	Undetermined
		30.635	39.152	Undetermined	Undetermined
Mean		30.4612	39.1104	Undetermined	0
Non UV- without RNaseI
		Input	TDP IP	Pum2 IP	IgG IP
		26.4245	Undetermined	Undetermined	Undetermined
		26.5802	Undetermined	Undetermined	Undetermined
		26.5519	Undetermined	Undetermined	Undetermined
Mean		26.5188	Undetermined	Undetermined	Undetermined

## Sheet: Rep 1 analysis to 18S
UV Treated- without RNaseI
	Input	IgG	TDP IP	∆ CT Input/TDPIP	2∆ CT Input/TDPIP (fold change)	Input adjustment & normalization	% Input in IP
18s	6.39079	23.1837	13.8496	-7.45884	0.00568413	0.000284207	0.0284207
TDP43	27.9148	37.3837	24.8962	3.01864	8.10401	0.4052	40.52
Sox5	26.8158	36.5335	23.4425	3.37326	10.3622	0.518111	51.8111
Rorb	29.5014	Undetermined	28.0699	1.43149	2.69724	0.134862	13.4862
Ctip2	28.0503	36.2734	26.9809	1.06947	2.09866	0.104933	10.4933
Pum2	30.4375	37.7491	31.3392	-0.901694	0.535258	0.0267629	2.67629
Cux1	30.4612	Undetermined	39.1104	-8.64924	0.00249069	0.000124535	0.0124535
	Input Pum2 IP	IgG	Pum2 IP	∆ CT Input/Pum2 IP	2∆ CT Input/pum2IP (fold change)	Input adjustment & normalization	% Input in IP
18s	6.39079	23.1837	19.9398	-13.549	8.34352e-05	4.17176e-06	0.000417176
TDP43	26.5954	37.3837	35.3746	-8.77926	0.00227603	0.000113802	0.0113802
Sox5	26.2426	36.5335	32.8352	-6.5926	0.0103617	0.000518084	0.0518084
Rorb	28.7063	Undetermined	33.1637	-4.45736	0.04552	0.002276	0.2276
Ctip2	26.9497	36.2734	32.8175	-5.86779	0.0171246	0.000856229	0.0856229
Pum2	30.4375	37.7491	33.1648	-2.72729	0.151009	0.00755044	0.755044
Cux1	30.4612	Undetermined	Undetermined	#VALUE!	#VALUE!	#VALUE!	#VALUE!
Non UV Treated- without RNaseI
	Input	IgG	TDP IP	∆ CT Input/TDPIP	2∆ CT Input/TDPIP (fold change)	Input adjustment & normalization	% Input in IP
18s	5.397	27.2247	17.4933	-12.0963	0.000228372	1.14186e-05	0.00114186
TDP43	23.9228	36.5165	30.204	-6.28129	0.0128571	0.000642856	0.0642856
Sox5	23.2894	38.6159	25.9439	-2.65448	0.158826	0.00794129	0.794129
Rorb	25.3083	32.8643	30.7154	-5.40717	0.0235657	0.00117828	0.117828
Ctip2	22.2193	37.4251	28.7721	-6.55272	0.0106521	0.000532605	0.0532605
Pum2	27.7053	34.7551	35.1599	-7.45465	0.0057007	0.000285035	0.0285035
Cux1	26.5188	Undetermined	Undetermined
	Input Pum2 IP	IgG	Pum2 IP	∆ CT Input/Pum2 IP	2∆ CT Input/pum2IP (fold change)	Input adjustment & normalization	% Input in IP
18s	5.397	27.2247	18.1708	-12.7738	0.000142795	7.13976e-06	0.000713976
TDP43	23.5128	36.5165	34.2077	-10.695	0.000603251	3.01625e-05	0.00301625
Sox5	22.8476	38.6159	32.5488	-9.70126	0.00120124	6.00621e-05	0.00600621
Rorb	24.9185	32.8643	34.6732	-9.75473	0.00115753	5.78766e-05	0.00578766
Ctip2	21.6216	37.4251	30.6815	-9.05992	0.00187367	9.36833e-05	0.00936833
Pum2	27.7053	34.7551	33.4038	-5.69856	0.0192558	0.000962792	0.0962792
Cux1	26.5188	Undetermined	Undetermined

## Sheet: Repl 2 raw values
Replicate 2
Rorb
UV treated- without RNaseI
	Input Pum2	Pum2 IP	Input TDP	TDP IP	Input IgG	IgG IP
	26.3614	33.751	26.9823	Undetermined	26.8688	Undetermined
	26.6841	31.860481*	26.831	33.9696	26.992	Undetermined
	26.6827	33.9709	26.8612	Undetermined	27.1952	Undetermined
Mean	26.5761	33.8609	26.8915	33.9696	27.0187	Undetermined
Non UV- without RNaseI
	Input Pum2	Pum2 IP	Input TDP	TDP IP	Input IgG	IgG IP
	23.8783	Undetermined	24.3172	Undetermined	24.1066	Undetermined
	24.2079	Undetermined	23.8461	Undetermined	23.9526	Undetermined
	24.0591	Undetermined	24.1338	32.2945	24.2043	Undetermined
Mean	24.0484	Undetermined	24.099	32.2945	24.0878	Undetermined
TDP43
UV treated- without RNaseI
	Input Pum2	Pum2 IP	Input TDP	TDP IP	Input IgG	IgG IP
	23.7313	32.8614	24.08674*	28.8832	24.4857	34.26041*
	23.7345	33.5933	24.5246	28.6454	24.4604	35.2252
	23.8073	36.0879	24.3497	28.6662	24.3106	35.4148
Mean	23.7577	34.1809	24.4371	28.7316	24.4189	35.32
Non UV- without RNaseI
	Input Pum2	Pum2 IP	Input TDP	TDP IP	Input IgG	IgG IP
	22.7865	33.6531	21.8687	39.2185	22.2843	34.8023
	5.154297*	35.3412	21.7613	32.4194	22.0104	32.7253
	21.9164	38.428	21.7368	36.9399	22.2399	33.3828
Mean	22.3515	35.8074	21.7889	36.1926	22.1782	33.6368
Sox5
UV treated- without RNaseI
	Input Pum2	Pum2 IP	Input TDP	TDP IP	Input IgG	IgG IP
	23.603	31.9064	23.6588	26.5856	24.0822	Undetermined
	23.6877	34.5372	23.5777	26.4701	23.782679*	Undetermined
	23.5466	32.9487	23.7346	26.4554	24.1283	34.1861
Mean	23.6125	33.1308	23.657	26.5037	24.1053	34.1861
Non UV- without RNaseI
	Input Pum2	Pum2 IP	Input TDP	TDP IP	Input IgG	IgG IP
	21.7836	35.4222	22.266	29.5001	22.0027	Undetermined
	21.5889	Undetermined	22.3052	30.007	22.07	Undetermined
	21.6836	Undetermined	21.9827	29.9989	21.9307	Undetermined
Mean	21.6854	35.4222	22.1846	29.8353	22.0011	Undetermined
Ctip2
UV treated- without RNaseI
	Input Pum2	Pum2 IP	Input TDP	TDP IP	Input IgG	IgG IP
	25.3084	39.212147*	25.9163	33.3585	25.9548	38.9101
	25.753	33.1127	25.8159	34.745	26.1136	Undetermined*
	Undetermined*	33.6915	Undetermined*	Undetermined*	Undetermined*	Undetermined*
Mean	25.5307	33.4021	25.8661	34.0517	26.0342	38.9101
Non UV- without RNaseI
	Input Pum2	Pum2 IP	Input TDP	TDP IP	Input IgG	IgG IP
	21.9987	38.5937	18.3181	35.4454	22.0487	33.4924
	21.8093	34.492	21.8652	34.1987	22.0558	Undetermined*
	Undetermined*	Undetermined*	Undetermined*	Undetermined*	Undetermined*	Undetermined*
Mean	21.904	36.5428	20.0916	34.822	22.0523	33.4924
18s
UV treated- without RNaseI
		Input	TDP IP	Pum2 IP	IgG IP
		6.67604	18.6119	20.7885	22.6331
		6.82485	18.6706	20.749	22.8183
		6.79489	18.7031	20.8109	22.6973
Mean		6.76526	18.6619	20.7828	22.7162
Non UV- without RNaseI
		Input	TDP IP	Pum2 IP	IgG IP
		6.54694	21.7564	24.6783	23.1413
		6.52687	21.6794	24.479	23.0665
		6.3892	21.6498	24.5159	22.9963
Mean		6.48767	21.6952	24.5578	23.0681
Pum2
UV treated- without RNaseI
		Input	TDP IP	Pum2 IP	IgG IP
		29.8576	Undetermined	35.5775260925292*	Undetermined
		29.9137	38.9896	34.2454	Undetermined
		29.4689	Undetermined	34.2506	Undetermined
Mean		29.7467	38.9896	34.248	Undetermined
Non UV- without RNaseI
		Input	TDP IP	Pum2 IP	IgG IP
		27.0672	Undetermined	Undetermined	Undetermined
		27.0496	Undetermined	Undetermined	Undetermined
		26.9426	Undetermined	Undetermined	39.1177
Mean		27.0198	Undetermined	Undetermined	39.1177
Cux1
UV treated- without RNaseI
		Input	TDP IP	Pum2 IP	IgG IP
		28.9066	38.1071	36.2837	Undetermined
		28.6701	37.0309	Undetermined	Undetermined
			35.1350631713867*	Undetermined	Undetermined
Mean		28.7883	37.569	36.2837	#DIV/0!
Non UV- without RNaseI
		Input	TDP IP	Pum2 IP	IgG IP
		25.7259	Undetermined	Undetermined	Undetermined
		26.2603	38.6194	Undetermined	Undetermined
			Undetermined	Undetermined	Undetermined
Mean		25.9931	38.6194	#DIV/0!	#DIV/0!
Fezf2
UV treated- without RNaseI
		Input	TDP IP	Pum2 IP	IgG IP
			32.7012	Undetermined	Undetermined
		29.3898	32.4688	Undetermined	Undetermined
		29.1529	32.3336	Undetermined	Undetermined
Mean		29.2714	32.5012	#DIV/0!	#DIV/0!
Non UV- without RNaseI
		Input	TDP IP	Pum2 IP	IgG IP
		24.9725	32.7026	Undetermined	Undetermined
		24.9544	32.638	Undetermined	Undetermined
		24.9675		Undetermined	Undetermined
Mean		24.9648	32.6703	#DIV/0!	#DIV/0!

## Sheet: Repl 2 analysis to 18S
Replicate 2
	Input	IgG	TDP IP	∆ CT Input/TDPIP	2∆ CT Input/TDPIP (fold change)	Input adjustment & normalization	% Input in IP
18s	6.76526	22.7162	18.6619	-11.8966	0.000262282	1.31141e-05	0.00131141
TDP43	24.4371	35.32	28.7316	-4.29443	0.0509621	0.00254811	0.254811
Sox5	23.657	34.1861	26.5037	-2.84667	0.139017	0.00695085	0.695085
Rorb	26.8915	Undetermined	33.9696	-7.07808	0.00740092	0.000370046	0.0370046
Ctip2	25.8661	38.9101	34.0517	-8.1856	0.00343471	0.000171735	0.0171735
Pum2	29.7467	Undetermined	38.9896	-9.24287	0.00165052	8.25259e-05	0.00825259
Cux1	28.7883	Undetermined	37.569	-8.78064	0.00227386	0.000113693	0.0113693
Fezf2	29.2714	Undetermined	32.5012	-3.22983	0.106592	0.00532961	0.532961
	Input Pum2 IP	IgG	Pum2 IP	∆ CT Input/Pum2 IP	2∆ CT Input/pum2IP (fold change)	Input adjustment & normalization	% Input in IP
18s	6.76526	22.7162	20.7828	-14.0176	6.02966e-05	3.01483e-06	0.000301483
TDP43	23.7577	35.32	34.1809	-10.4232	0.000728305	3.64152e-05	0.00364152
Sox5	23.6125	34.1861	33.1308	-9.51831	0.00136365	6.81826e-05	0.00681826
Rorb	26.5761	Undetermined	33.8609	-7.28486	0.00641265	0.000320632	0.0320632
Ctip2	25.5307	38.9101	33.4021	-7.87141	0.00427041	0.00021352	0.021352
Pum2	29.7467	Undetermined	34.248	-4.50127	0.0441554	0.00220777	0.220777
Cux1	28.7883	Undetermined	36.2837	-7.49537	0.00554203	0.000277102	0.0277102
Fezf2	29.2714	Undetermined	Undetermined	#VALUE!	#VALUE!	#VALUE!	#VALUE!
Non UV Treated- without RNaseI
	Input	IgG	TDP IP	∆ CT Input/TDPIP	2∆ CT Input/TDPIP (fold change)	Input adjustment & normalization	% Input in IP
18s	6.48767	23.0681	21.6952	-15.2075	2.64288e-05	1.32144e-06	0.000132144
TDP43	21.7889	33.6368	36.1926	-14.4037	4.61382e-05	2.30691e-06	0.000230691
Sox5	22.1846	Undetermined	29.8353	-7.65069	0.00497635	0.000248818	0.0248818
Rorb	24.099	Undetermined	32.2945	-8.19553	0.00341114	0.000170557	0.0170557
Ctip2	20.0916	33.4924	34.822	-14.7304	3.67876e-05	1.83938e-06	0.000183938
Pum2	27.0198	39.1177	Undetermined	#VALUE!	#VALUE!	#VALUE!	#VALUE!
Cux1	25.9931	Undetermined	38.6194	-12.6263	0.000158159	7.90794e-06	0.000790794
Fezf2	24.9648	Undetermined	32.6703	-7.70553	0.00479077	0.000239538	0.0239538
	Input Pum2 IP	IgG	Pum2 IP	∆ CT Input/Pum2 IP	2∆ CT Input/pum2IP (fold change)	Input adjustment & normalization	% Input in IP
18s	6.48767	23.0681	24.5578	-18.0701	3.63383e-06	1.81691e-07	1.81691e-05
TDP43	22.3515	33.6368	35.8074	-13.456	8.89918e-05	4.44959e-06	0.000444959
Sox5	21.6854	Undetermined	35.4222	-13.7369	7.32471e-05	3.66236e-06	0.000366236
Rorb	24.0484	Undetermined	Undetermined	#VALUE!	#VALUE!	#VALUE!	#VALUE!
Ctip2	21.904	33.4924	36.5428	-14.6389	3.91979e-05	1.9599e-06	0.00019599
Pum2	27.0198	39.1177	Undetermined	#VALUE!	#VALUE!	#VALUE!	#VALUE!
Cux1	25.9931	Undetermined	Undetermined	#VALUE!	#VALUE!	#VALUE!	#VALUE!
Fezf2	24.9648	Undetermined	Undetermined	#VALUE!	#VALUE!	#VALUE!	#VALUE!

## Sheet: Rep 3 raw values
	Replicate 3
	Rorb
	UV treated- without RNaseI
		Input Pum2	Pum2 IP	Input TDP	TDP IP	Input IgG	IgG IP
		27.2719	31.8939	27.5012	31.22892*	27.0832	Undetermined
		27.4394	31.4465	27.2888	33.9182	26.9772	Undetermined
		26.983158*	33.133564*	27.4399	34.1632	26.8557	Undetermined
	Mean	27.3556	31.6702	27.41	34.0407	26.9721	Undetermined
	Non UV- without RNaseI
		Input Pum2	Pum2 IP	Input TDP	TDP IP	Input IgG	IgG IP
		24.0654	33.9496	23.9721	32.5792	24.576311*	Undetermined
		24.1174	Undetermined*	23.9595	33.9736	23.7934	Undetermined
		24.1321	34.0986	23.9831	Undetermined	23.8698	34.1219
	Mean	24.105	34.0241	23.9716	33.2764	23.8316	34.1219
	TDP43
	UV treated- without RNaseI
		Input Pum2	Pum2 IP	Input TDP	TDP IP	Input IgG	IgG IP
		24.2999	32.97881*	24.1836	28.2325	24.3207	37.566
		24.4732	33.7304	23.639223*	28.2191	23.8091	34.8004
		23.7523	33.8333	24.0164	28.4202	24.1501	36.7669
	Mean	24.1751	33.7819	24.1	28.2906	24.0933	36.3777
	Non UV- without RNaseI
		Input Pum2	Pum2 IP	Input TDP	TDP IP	Input IgG	IgG IP
		22.1342	33.3158	21.9628	32.0739	22.0463	35.299
		22.0673	32.42654*	21.9573	34.9128	22.3898	35.38
		21.9262	33.5655	22.147	32.9334	21.9279	34.9887
	Mean	22.0425	33.4407	22.0224	33.3067	22.1213	35.2226
	Sox5
	UV treated- without RNaseI
		Input Pum2	Pum2 IP	Input TDP	TDP IP	Input IgG	IgG IP
		23.423	34.0789	23.8547	26.0609	23.6822	Undetermined
		23.2184	30.8799	23.8043	26.3567	23.2781	35.5116
		23.691	32.9843	24.0179	26.4464	23.7362	Undetermined
	Mean	23.4441	32.6477	23.8923	26.288	23.5655	35.5116
	Non UV- without RNaseI
		Input Pum2	Pum2 IP	Input TDP	TDP IP	Input IgG	IgG IP
		21.9073	33.114	22.0088	29.9158	22.1783	34.1742
		21.9945	31.434603*	21.878	30.2452	22.0643	32.9567
		21.8732	33.5073	21.8948	30.256	22.092	Undetermined
	Mean	21.925	33.3106	21.9272	30.139	22.1116	33.5654
	Ctip2
	UV treated- without RNaseI
		Input Pum2	Pum2 IP	Input TDP	TDP IP	Input IgG	IgG IP
		26.2571	34.065914*	26.2915	33.1299	25.9678	39.4235
		26.4277	33.4903	26.0027	34.0715	25.9899	Undetermined*
		26.2292	33.55	26.1124	35.9825	25.8238	Undetermined*
	Mean	26.3047	33.5202	26.1356	34.3946	25.9272	39.4235
	Non UV- without RNaseI
		Input Pum2	Pum2 IP	Input TDP	TDP IP	Input IgG	IgG IP
		18.238836*	33.5658	17.820816*	Undetermined*	22.1568	Undetermined*
		21.3392	33.4614	21.5626	37.6023	22.0928	38.6233
		21.4014	Undetermined*	21.7293	33.2216	19.229662*	39.1183
	Mean	21.3703	33.5136	21.646	35.412	22.1248	38.8708
	18s
	UV treated- without RNaseI
			Input	TDP IP	Pum2 IP	IgG IP
			6.99804	18.4473	20.6638	27.524
			6.96499	18.3778	20.6208	27.4441
			6.99769	18.4617	20.646	27.3085
	Mean		6.98691	18.4289	20.6436	27.4255
	Non UV- without RNaseI
			Input	TDP IP	Pum2 IP	IgG IP
			6.54875	20.508	20.8609	22.2719
			6.40243	20.4156	20.8434	22.1941
			6.4348	20.4167	20.8687	22.464
	Mean		6.46199	20.4468	20.8577	22.31
	Cux1
	UV treated- without RNaseI
			Input	TDP IP	Pum2 IP	IgG IP
			29.7832	30.6294	Undetermined	Undetermined
			29.9089		38.9332	Undetermined
				30.5183	Undetermined	Undetermined
	Mean		29.8461	30.5738	38.9332	#DIV/0!
	Non UV- without RNaseI
			Input	TDP IP	Pum2 IP	IgG IP
			26.2977	31.5302	34.7737	Undetermined
			26.5619	30.3049	33.225	Undetermined
			26.9925	31.3155	Undetermined	Undetermined
	Mean		26.6173	31.0502	33.9994	#DIV/0!
	Fezf2
	UV treated- without RNaseI
			Input	TDP IP	Pum2 IP	IgG IP
			28.7576	Undetermined	26.7509	Undetermined
			28.7579	34.9368	26.9081	Undetermined
			29.1404	Undetermined	26.649	Undetermined
	Mean		28.8853	34.9368	26.7694	#DIV/0!
	Non UV- without RNaseI
			Input	TDP IP	Pum2 IP	IgG IP
			23.9883	Undetermined	28.3053	Undetermined
			24.0174	35.4009	28.3946	Undetermined
			24.2284	35.4263	28.2246	Undetermined
	Mean		24.0781	35.4136	28.3082	#DIV/0!

## Sheet: repl 3 analysis to 18S
Replicate 3
UV Treated- without RNaseI
	Input	IgG	TDP IP	∆ CT Input/TDPIP	2∆ CT Input/TDPIP (fold change)	Input adjustment & normalization	% Input in IP
18s	6.98691	27.4255	18.4289	-11.442	0.000359426	1.79713e-05	0.00179713
TDP43	24.1	36.3777	28.2906	-4.19059	0.0547654	0.00273827	0.273827
Sox5	23.8923	35.5116	26.288	-2.39568	0.190032	0.00950162	0.950162
Rorb	27.41	Undetermined	34.0407	-6.63076	0.0100912	0.000504561	0.0504561
Ctip2	26.1356	39.4235	34.3946	-8.25908	0.00326414	0.000163207	0.0163207
Pum2	30.4499	35.0793	Undetermined	#VALUE!	#VALUE!	#VALUE!	#VALUE!
Cux1	29.8461	Undetermined	30.5738	-0.727776	0.603834	0.0301917	3.01917
Fezf2	28.8853	Undetermined	34.9368	-6.05152	0.0150768	0.000753841	0.0753841
	Input Pum2 IP	IgG	Pum2 IP	∆ CT Input/Pum2 IP	2∆ CT Input/pum2IP (fold change)	Input adjustment & normalization	% Input in IP
18s	6.98691	27.4255	20.6436	-13.6566	7.74357e-05	3.87179e-06	0.000387179
TDP43	24.1751	36.3777	33.7819	-9.60673	0.00128259	6.41295e-05	0.00641295
Sox5	23.4441	35.5116	32.6477	-9.20361	0.00169605	8.48025e-05	0.00848025
Rorb	27.3556	Undetermined	31.6702	-4.31455	0.0502564	0.00251282	0.251282
Ctip2	26.3047	39.4235	33.5202	-7.21548	0.00672859	0.00033643	0.033643
Pum2	30.4499	35.0793	34.3466	-3.89675	0.0671367	0.00335683	0.335683
Cux1	29.8461	Undetermined	38.9332	-9.08716	0.00183862	9.19309e-05	0.00919309
Fezf2	28.8853	Undetermined	26.7694	2.11592	4.33467	0.216734	21.6734
Non UV Treated- without RNaseI
	Input	IgG	TDP IP	∆ CT Input/TDPIP	2∆ CT Input/TDPIP (fold change)	Input adjustment & normalization	% Input in IP
18s	6.46199	22.31	20.4468	-13.9848	6.16832e-05	3.08416e-06	0.000308416
TDP43	22.0224	35.2226	33.3067	-11.2843	0.000400937	2.00469e-05	0.00200469
Sox5	21.9272	33.5654	30.139	-8.21184	0.00337279	0.00016864	0.016864
Rorb	23.9716	34.1219	33.2764	-9.30484	0.00158111	7.90557e-05	0.00790557
Ctip2	21.646	38.8708	35.412	-13.766	7.17818e-05	3.58909e-06	0.000358909
Pum2	27.1169	37.4993	35.2505	-8.13353	0.00356094	0.000178047	0.0178047
Cux1	26.6173	Undetermined	31.0502
Fezf2	24.0781	Undetermined	35.4136
	Input Pum2 IP	IgG	Pum2 IP	∆ CT Input/Pum2 IP	2∆ CT Input/pum2IP (fold change)	Input adjustment & normalization	% Input in IP
18s	6.46199	22.31	20.8577	-14.3957	4.63944e-05	2.31972e-06	0.000231972
TDP43	22.0425	35.2226	33.4407	-11.3981	0.000370532	1.85266e-05	0.00185266
Sox5	21.925	33.5654	33.3106	-11.3856	0.000373756	1.86878e-05	0.00186878
Rorb	24.105	34.1219	34.0241	-9.91911	0.00103288	5.1644e-05	0.0051644
Ctip2	21.3703	38.8708	33.5136	-12.1433	0.000221055	1.10528e-05	0.00110528
Pum2	27.1169	37.4993	33.8648	-6.74784	0.00930459	0.000465229	0.0465229
Cux1	26.6173	Undetermined	33.9994	-7.38202	0.00599502	0.000299751	0.0299751
Fezf2	24.0781	Undetermined	28.3082	-4.23012	0.0532851	0.00266426	0.266426

## Sheet: repl 4 raw values
Replicate 4
TDP43
UV treated
	Input	TDP IP	Pum2 IP	IgG IP
	23.8477	23.3572	29.7922744750976*	35.9263
	23.8052	23.3965	30.5615	33.6327
	23.7944	23.5825	30.6122	34.6332
Mean	23.8157	23.4454	30.5868	34.7307
Non UV
	Input	TDP IP	Pum2 IP	IgG IP
	21.4953	24.7677	30.2646	31.1255
	21.2049	24.344	30.9863414764404*	30.9473
	21.1607	24.6216	30.3023	31.6328
Mean	21.2869	24.5778	30.2834	31.2352
Sox5
UV treated
	Input	TDP IP	Pum2 IP	IgG IP
	23.9332	22.9263	29.4005317687988*	33.956
	23.9169	22.8928	30.7968	32.1864
	23.9718	22.8379	30.3938	32.9833
Mean	23.9406	22.8857	30.5953	33.0419
Non UV
	Input	TDP IP	Pum2 IP	IgG IP
	21.5873	21.913	30.9049	32.1565
	21.5096	21.7894	30.8618	33.5179
	21.5781	21.7909	30.3436	32.6427
Mean	21.5583	21.8311	30.7034	32.7724
Rorb
UV treated
	Input	TDP IP	Pum2 IP	IgG IP
	26.7864	28.5062	30.5937	32.7289
	26.8628	28.3649	30.6813	32.8831
	26.6085	28.2527	32.0803489685058*	Undetermined*
Mean	26.7526	28.3746	30.6375	32.806
Non UV
	Input	TDP IP	Pum2 IP	IgG IP
	23.818	27.4692	31.7146	Undetermined
	23.7263	27.1931	33.7186431884765*	Undetermined
	23.6914	27.4519	31.7072	Undetermined
Mean	23.7452	27.3714	31.7109	Undetermined
18s
UV treated
	Input	TDP IP	Pum2 IP	IgG IP
	8.05093	15.6135	18.3714	18.8197
	8.07489	15.5708	18.3739	18.8652
	8.09096	15.6655	18.2662	18.7968
Mean	8.07226	15.6166	18.3372	18.8272
Non UV
	Input	TDP IP	Pum2 IP	IgG IP
	8.04455	13.9813	17.5174	21.2484
	7.99765	13.9351	17.4187	21.1502
	8.05447	13.929	17.5826	21.1277
Mean	8.03223	13.9485	17.5062	21.1754
Pum2
UV treated
	Input	TDP IP	Pum2 IP	IgG IP
	29.9115	32.0106	31.8946	34.3308067321777*
	29.62	32.5299	32.149917602539*	33.8528
	29.4074	33.2029	31.7606	33.9427
Mean	29.6463	32.5811	31.8276	33.8978
Non UV
	Input	TDP IP	Pum2 IP	IgG IP
	27.231	31.8238	Undetermined	Undetermined
	27.4275	31.9056	34.6993	34.9506
	27.2756	31.0724	34.4331	35.9266
Mean	27.3114	31.6006	34.5662	35.4386
Ctip2
UV treated
	Input	TDP IP	Pum2 IP	IgG IP
	25.2664	28.5641	31.2036	35.1021
	25.3056	28.3369	30.8916	34.1645
	25.257	28.8572	31.0517	39.5095
Mean	25.2763	28.5861	31.049	36.2587
Non UV
	Input	TDP IP	Pum2 IP	IgG IP
	21.1336	26.0393	29.921	38.1837
	21.2185	26.2244	30.3802	34.7175
	21.3482	26.249	29.964	34.2437
Mean	21.2334	26.1709	30.0884	35.715
Fezf2
UV treated
	Input	TDP IP	Pum2 IP	IgG IP
	26.7062	27.3964	Undetermined	35.1741
	26.819	27.2365	Undetermined	Undetermined
	27.0085	27.3412	Undetermined	Undetermined
Mean	26.8446	27.3247	#DIV/0!	35.1741
Non UV
	Input	TDP IP	Pum2 IP	IgG IP
	23.4754	23.904	33.2334	Undetermined
	23.6351	24.0066	Undetermined	Undetermined
	23.5193	24.1717	Undetermined	Undetermined
Mean	23.5433	24.0274	33.2334	#DIV/0!
Cux1
UV treated
	Input	TDP IP	Pum2 IP	IgG IP
	25.9677	30.6204	35.1692	Undetermined
	26.8631	33.9378	Undetermined	34.1972
	27.5684	33.652	Undetermined	Undetermined
Mean	26.7997	32.7368	35.1692	34.1972
Non UV
	Input	TDP IP	Pum2 IP	IgG IP
	23.857	26.8849	33.1367	Undetermined
	24.18	27.3745	35.9335	Undetermined
	25.001	27.4558	34.3441	Undetermined
Mean	24.346	27.2384	34.4714	#DIV/0!

## Sheet: repl 4 analysis to 18S
Replicate 4
	Input	IgG	TDP IP	∆ CT Input/TDPIP	2∆ CT Input/TDPIP (fold change)	Input adjustment & normalization	% Input in IP
18s	8.07226	18.8272	15.6166	-7.54436	0.00535701	0.00026785	0.026785
TDP43	23.8157	34.7307	23.4454	0.370303	1.29262	0.0646312	6.46312
Sox5	23.9406	33.0419	22.8857	1.05497	2.07767	0.103884	10.3884
Rorb	26.7526	32.806	28.3746	-1.62202	0.32488	0.016244	1.6244
Ctip2	25.2763	36.2587	28.5861	-3.30976	0.100847	0.00504235	0.504235
pum2	29.6463	33.8978	32.5811	-2.93482	0.130777	0.00653884	0.653884
Cux1	26.7997	34.1972	32.7368	-5.93703	0.0163221	0.000816107	0.0816107
Fezf2	26.8446	35.1741	27.3247	-0.48011	0.716923	0.0358462	3.58462
	Input	IgG	Pum2 IP	∆ CT Input/Pum2 IP	2∆ CT Input/pum2IP (fold change)	Input adjustment & normalization	% Input in IP
18s	8.07226	18.8272	18.3372	-10.2649	0.000812739	4.0637e-05	0.0040637
TDP43	23.8157	34.7307	30.5868	-6.77109	0.00915584	0.000457792	0.0457792
Sox5	23.9406	33.0419	30.5953	-6.65467	0.00992533	0.000496267	0.0496267
Rorb	26.7526	32.806	30.6375	-3.88491	0.0676904	0.00338452	0.338452
Ctip2	25.2763	36.2587	31.049	-5.77264	0.018292	0.000914601	0.0914601
pum2	29.6463	33.8978	31.8276	-2.18127	0.220482	0.0110241	1.10241
Cux1	26.7997	34.1972	35.1692	-8.36949	0.00302366	0.000151183	0.0151183
Fezf2	26.8446	35.1741	Undetermined	#VALUE!	#VALUE!	#VALUE!	#VALUE!
Non UV Treated
	Input	IgG	TDP IP	∆ CT Input/TDPIP	2∆ CT Input/TDPIP (fold change)	Input adjustment & normalization	% Input in IP
18s	8.03223	21.1754	13.9485	-5.91626	0.0165588	0.000827938	0.0827938
TDP43	21.2869	31.2352	24.5778	-3.29083	0.102179	0.00510893	0.510893
Sox5	21.5583	32.7724	21.8311	-0.272746	0.827743	0.0413871	4.13871
Rorb	23.7452	Undetermined	27.3714	-3.62617	0.080987	0.00404935	0.404935
Ctip2	21.2334	35.715	26.1709	-4.93746	0.0326345	0.00163172	0.163172
pum2	27.3114	35.4386	31.6006	-4.28921	0.0511469	0.00255734	0.255734
Cux1	24.346	Undetermined	27.2384	-2.89237	0.134682	0.00673409	0.673409
Fezf2	23.5433	Undetermined	24.0274	-0.484166	0.71491	0.0357455	3.57455
	Input	IgG	Pum2 IP	∆ CT Input/Pum2 IP	2∆ CT Input/pum2IP (fold change)	Input adjustment & normalization	% Input in IP
18s	8.03223	21.1754	17.5062	-9.474	0.00140619	7.03093e-05	0.00703093
TDP43	21.2869	31.2352	30.2834	-8.99651	0.00195786	9.78928e-05	0.00978928
Sox5	21.5583	32.7724	30.7034	-9.14509	0.00176626	8.8313e-05	0.0088313
Rorb	23.7452	Undetermined	31.7109	-7.96568	0.00400028	0.000200014	0.0200014
Ctip2	21.2334	35.715	30.0884	-8.855	0.00215964	0.000107982	0.0107982
pum2	27.3114	35.4386	34.5662	-7.25487	0.00654737	0.000327369	0.0327369
Cux1	24.346	Undetermined	34.4714	-10.1254	0.000895261	4.47631e-05	0.00447631
Fezf2	23.5433	Undetermined	33.2334	-9.6901	0.00121057	6.05283e-05	0.00605283

## Sheet: repl 5 raw values
	Replicate 5
	TDP43
	UV treated
		Input	TDP IP	Pum2 IP	IgG IP
		24.8067	21.3596	31.1509	31.9481
		24.7872	21.5512	30.9888	31.3856
		24.7788	21.3845	31.4690628051757*	32.3197
	Mean	24.7909	21.4318	31.0698	31.8845
	Non UV
		Input	TDP IP	Pum2 IP	IgG IP
		21.6418	24.2933	30.4019	33.2660827636718*
		21.616	24.265	30.5958	32.5367
		21.6594	24.333	31.2443923950195*	32.8115
	Mean	21.639	24.2971	30.4988	32.6741
	Sox5
	UV treated
		Input	TDP IP	Pum2 IP	IgG IP
		25.2024	21.1498	30.287	34.8157
		25.5081	21.3129	30.4863	33.7234916687011*
		25.412	21.2004	30.7785	34.5937
	Mean	25.3741	21.221	30.5173	34.7047
	Non UV
		Input	TDP IP	Pum2 IP	IgG IP
		22.5679	21.6775	30.3231	34.0621
		22.1999	21.7369	31.526834487915*	36.4736
		22.1656	21.6769	30.6636	35.1332
	Mean	22.3111	21.6971	30.4934	35.223
	Rorb
	UV treated
		Input	TDP IP	Pum2 IP	IgG IP
		27.5539	26.4633	30.2714	33.7651
		27.4199	26.2803	30.1568	Undetermined
		27.4927	26.5536	30.5664	32.4262
	Mean	27.4888	26.4324	30.3315	33.0957
	Non UV
		Input	TDP IP	Pum2 IP	IgG IP
		23.6108	27.1004	30.8117	Undetermined
		23.4846	27.106	31.3906	Undetermined
		23.5321	26.9507	32.2979	Undetermined
	Mean	23.5425	27.0524	31.5001	Undetermined
	18s
	UV treated
		Input	TDP IP	Pum2 IP	IgG IP
		7.9966	13.2808	17.7471	20.8958
		8.17695	13.2583	17.6694	20.9822
		8.05601	13.2854	17.7549	20.9431
	Mean	8.07652	13.2748	17.7238	20.9403
	Non UV
		Input	TDP IP	Pum2 IP	IgG IP
		7.10655	13.993	18.0685	23.9687
		7.24621	14.1465	18.1714	24.113
		7.17735	14.1734	18.1839	23.9005
	Mean	7.1767	14.1043	18.1413	23.9941
	Pum2
	UV treated
		Input	TDP IP	Pum2 IP	IgG IP
		29.5707	30.84	31.6843	Undetermined
		29.7655	31.19	31.2463	Undetermined
		29.7609	30.7203	31.439	Undetermined
	Mean	29.699	30.9168	31.4566	Undetermined
	Non UV
		Input	TDP IP	Pum2 IP	IgG IP
		26.9705	30.8444	34.3046	37.5899
		26.9456	30.8863	33.455	Undetermined
		26.9872	33.7967	Undetermined	Undetermined
	Mean	26.9678	31.8424	33.8798	37.5899
	Ctip2
	UV treated
		Input	TDP IP	Pum2 IP	IgG IP
		25.7184	25.9372	30.6825	36.3653
		25.8269	26.0612	30.32	35.351
		25.6793	26.0423	30.8909	Undetermined
	Mean	25.7415	26.0136	30.6311	35.8581
	Non UV
		Input	TDP IP	Pum2 IP	IgG IP
		20.9694	25.5025	30.8147	37.6022
		20.9775	25.5115	30.1244	37.7715
		20.9758	25.4134	30.2071	37.1751
	Mean	20.9743	25.4758	30.3821	37.5162
	Fezf2
	UV treated
		Input	TDP IP	Pum2 IP	IgG IP
		27.6148	24.8841	34.1996	Undetermined
		27.7495	24.9158	Undetermined	Undetermined
		27.6658	24.9914	33.9914	Undetermined
	Mean	27.6767	24.9304	34.0955	#DIV/0!
	Non UV
		Input	TDP IP	Pum2 IP	IgG IP
		23.607	25.7067	Undetermined	Undetermined
		23.7757	25.7815	Undetermined	Undetermined
		23.6933	25.8019	Undetermined	Undetermined
	Mean	23.692	25.7634	#DIV/0!	#DIV/0!
	Cux1
	UV treated
		Input	TDP IP	Pum2 IP	IgG IP
		28.5751	29.1744	34.5129	Undetermined
		28.3655	29.3491	36.548	Undetermined
		29.25	30.5556	38.6634	Undetermined
	Mean	28.7302	29.693	36.5747	#DIV/0!
	Non UV
		Input	TDP IP	Pum2 IP	IgG IP
		24.8265	27.9077	35.9935	Undetermined
		25.0597	28.7898	Undetermined	Undetermined
		24.8361	29.9899	35.9242	Undetermined
	Mean	24.9074	28.8958	35.9589	#DIV/0!

## Sheet: repl 5 analysis to 18S
Replicate 5
UV Treated
	Input	IgG	TDP IP	∆ CT Input/TDPIP	2∆ CT Input/TDPIP (fold change)	Input adjustment & normalization	% Input in IP
18s	8.07652	20.9403	13.2748	-5.19831	0.0272366	0.00136183	0.136183
TDP43	24.7909	31.8845	21.4318	3.35911	10.2611	0.513054	51.3054
Sox5	25.3741	34.7047	21.221	4.15311	17.7914	0.889571	88.9571
Rorb	27.4888	33.0957	26.4324	1.0564	2.07973	0.103987	10.3987
Ctip2	25.7415	35.8581	26.0136	-0.272057	0.828138	0.0414069	4.14069
pum2	29.699	Undetermined	30.9168	-1.21773	0.429959	0.021498	2.1498
Cux1	28.7302	Undetermined	29.693	-0.962793	0.513063	0.0256531	2.56531
Fezf2	27.6767	Undetermined	24.9304	2.74623	6.70959	0.33548	33.548
	Input	IgG	Pum2 IP	∆ CT Input/Pum2 IP	2∆ CT Input/pum2IP (fold change)	Input adjustment & normalization	% Input in IP
18s	8.07652	20.9403	17.7238	-9.64729	0.00124703	6.23513e-05	0.00623513
TDP43	24.7909	31.8845	31.0698	-6.27894	0.0128781	0.000643904	0.0643904
Sox5	25.3741	34.7047	30.5173	-5.14316	0.0282979	0.0014149	0.14149
Rorb	27.4888	33.0957	30.3315	-2.8427	0.1394	0.00696998	0.696998
Ctip2	25.7415	35.8581	30.6311	-4.88958	0.0337358	0.00168679	0.168679
pum2	29.699	Undetermined	31.4566	-1.75752	0.295756	0.0147878	1.47878
Cux1	28.7302	Undetermined	36.5747	-7.8445	0.00435082	0.000217541	0.0217541
Fezf2	27.6767	Undetermined	34.0955	-6.41884	0.0116879	0.000584396	0.0584396
Non UV Treated
	Input	IgG	TDP IP	∆ CT Input/TDPIP	2∆ CT Input/TDPIP (fold change)	Input adjustment & normalization	% Input in IP
18s	7.1767	23.9941	14.1043	-6.92761	0.00821453	0.000410726	0.0410726
TDP43	21.639	32.6741	24.2971	-2.65807	0.158432	0.00792158	0.792158
Sox5	22.3111	35.223	21.6971	0.614066	1.53057	0.0765284	7.65284
Rorb	23.5425	Undetermined	27.0524	-3.50989	0.0877848	0.00438924	0.438924
Ctip2	20.9743	37.5162	25.4758	-4.50156	0.0441464	0.00220732	0.220732
pum2	26.9678	37.5899	31.8424	-4.87467	0.0340861	0.00170431	0.170431
Cux1	24.9074	Undetermined	28.8958	-3.98836	0.0630063	0.00315032	0.315032
Fezf2	23.692	Undetermined	25.7634	-2.07135	0.237937	0.0118968	1.18968
	Input	IgG	Pum2 IP	∆ CT Input/Pum2 IP	2∆ CT Input/pum2IP (fold change)	Input adjustment & normalization	% Input in IP
18s	7.1767	23.9941	18.1413	-10.9646	0.000500425	2.50212e-05	0.00250212
TDP43	21.639	32.6741	30.4988	-8.8598	0.00215245	0.000107623	0.0107623
Sox5	22.3111	35.223	30.4934	-8.18221	0.00344277	0.000172139	0.0172139
Rorb	23.5425	Undetermined	31.5001	-7.95763	0.00402269	0.000201134	0.0201134
Ctip2	20.9743	37.5162	30.3821	-9.40784	0.00147217	7.36085e-05	0.00736085
pum2	26.9678	37.5899	33.8798	-6.91201	0.00830379	0.00041519	0.041519
Cux1	24.9074	Undetermined	35.9589	-11.0514	0.00047118	2.3559e-05	0.0023559
Fezf2	23.692	Undetermined	Undetermined	#VALUE!	#VALUE!	#VALUE!	#VALUE!

[truncated: 3 more sheets: repl 6 raw values, repl 6 analysis to 18S, Consolidated results from 6 rep]
