# Supplementary material for: Pum2 and TDP-43 refine area-specific cytoarchitecture post-mitotically and modulate translation of Sox5, Bcl11b, and Rorb mRNAs in developing mouse neocortex
Source: eLife. 2022 Mar 9;11:e55199. doi: 10.7554/eLife.55199 (PMC8906809; doi:10.7554/eLife.55199)
Supplement: Source data 27. — Quantification of the fold change for Emx1 mRNA normalized to GAPDH mRNA is shown for P0 somatosensory area-enriched cortical lysates of Pum2 cKO relative to respective control samples (reviewers Figure 1a). Quantification of the fold change for Sox6 and Unc5C mRNA normalized to GAPDH mRNA is shown for P0 somatosensory area-enriched cortical lysates of Pum2 cKO and TDP43A315T (reviewers Figure 2a and b) relative to respective control samples (Ctrl). Data are shown as means ± standard error of the mean (SEM) for n = 4-6 animals of each genotype. *p≤0.05 by two-tailed t-test. [file elife-55199-data27.xlsx]

## Sheet: Pum2 CKO (a)
P0	CTs							P0 SA	Fold Change To GAPDH							Fold ChangePum2 CKO to ctrl								Fold Change ctrl to average ctrl
	ctrl1 GAPDH	ctrl1 sox6	ctrl1 unc5c	ctrl1 emx1					GAPDH	sox6	unc5c	emx1					GAPDH	sox6	unc5c	emx1					GAPDH	sox6	unc5c	emx1
	18.0233		27.2359	24.5954				ctrl1	1	0.00146347	0.00163754	0.0115802				Pum2 CKO1/ctrl	1	1.08252	1.27164	0.784394				ctrl1/ctrl	1	0.811372	0.945434	1.11226
	18.3796	27.8142		24.6447				ctrl3	1	0.00197214	0.00162061	0.0104573				Pum2 CKO2/ctrl	1	0.543027	0.964663	0.684004				ctrl3/ctrl	1	1.09339	0.93566	1.00441
		27.4215	27.6756	24.6609				ctrl5	1	0.00183986	0.00154774	0.00843386				Pum2 CKO3/ctrl	1	0.599347	1.39013	2.26308				ctrl5/ctrl	1	1.02005	0.893584	0.810061
Mean	18.2015	27.6179	27.4557	24.6337				ctrl6	1	0.00193932	0.00212232	0.0111742				Pum2 CKO 4/ctrl	1	0.551375	0.424822	0.328979				ctrl6/ctrl	1	1.07519	1.22532	1.07327
∆ CT	0	9.41639	9.25425	6.4322												Pum2 CKO 5/ctrl	1	0.65928	0.848484	0.471254
fold change	1	0.00146347	0.00163754	0.0115802												Average	1	0.68711	0.979948	0.906341
								pum2 cko1	1	0.00195254	0.00220255	0.00816663				stdev	0	0.225838	0.380465	0.779051				Average	1	1	1	1
	ctrl3 GAPDH	ctrl3 sox6	ctrl3 unc5c	ctrl3 emx1				pum2 cko2	1	0.000979455	0.00167085	0.00712144				std error	0	0.100998	0.170149	0.348402				stdev	0	0.129561	0.151889	0.134248
	18.1002	27.1574	27.1417	24.7861				pum2 cko3	1	0.00108104	0.00240777	0.0235618				T-test	#DIV/0!	0.0443135	0.924503	0.82132				std error	0	0.0647803	0.0759446	0.0671239
	18.4357		27.6191	24.7399				pum2 cko4	1	0.000994513	0.000735814	0.00342513						*
	17.9732	27.154	27.556	24.7211				pum2 cko5	1	0.00118914	0.00146962	0.00490641
Mean	18.1697	27.1557	27.4389	24.749
∆ CT	0	8.98602	9.26925	6.57935
fold change	1	0.00197214	0.00162061	0.0104573
	ctrl5 GAPDH	ctrl5 sox6	ctrl5 unc5c	ctrl5 emx1
	19.0182		28.3136	26.0014
	19.0852	28.1688	28.4611	25.9883
		28.1071		25.8343
Mean	19.0517	28.1379	28.3874	25.9413
∆ CT	0	9.08619	9.33563	6.88959
fold change	1	0.00183986	0.00154774	0.00843386
	ctrl6 GAPDH	ctrl6 sox6	ctrl6 unc5c	ctrl6 emx1
	19.668	28.5143	28.6342	26.1917
	19.6969	29.0156	28.6569	26.2566				Average ctrl	1	0.0018037	0.00173205	0.0104114
	19.9314	28.7972		26.2991				Average pum2 cko	1	0.00123934	0.00169732	0.00943628
Mean	19.7654	28.7757	28.6456	26.2491				STDEV ctrl	0	0.000233688	0.00026308	0.00139771
∆ CT	0	9.01023	8.88014	6.48368				STDEV pum2 cko	0	0.000407344	0.000658985	0.00811101						GAPDH	sox6	unc5c	emx1
fold change	1	0.00193932	0.00212232	0.0111742				STD Error ctrl	0	0.000116844	0.00013154	0.000698853					Average ctrl	1	1	1	1
								STD Error pum2 cko	0	0.00018217	0.000294707	0.00362735					Average cko	1	0.68711	0.979948	0.906341
								T-Test	#DIV/0!	0.0443135	0.924503	0.82132					std error ctrl	0	0.0647803	0.0759446	0.0671239
										*							std error pum2 cko	0	0.0599012	0.174783	0.0887758
P0	CTs
	pum2 cko1 GAPDH	pum2 cko1 sox6	pum2 cko1 unc5c	pum2 cko1 emx1
	18.0862	26.8527	26.7902	24.9936
	18.3955		27.2063	25.1019
	17.9377	27.4278	26.9027	25.132
Mean	18.1398	27.1402	26.9664	25.0758
∆ CT	0	9.00043	8.82661	6.93604
fold change	1	0.00195254	0.00220255	0.00816663
	pum2 cko2 GAPDH	pum2 cko2 sox6	pum2 cko2 unc5c	pum2 cko2 emx1
	18.5623	28.3735	27.5723	25.447
	18.0266	28.5329		25.4533
	18.3143	27.9842	27.4804	25.4039
Mean	18.3011	28.2968	27.5263	25.4347
∆ CT	0	9.99573	9.2252	7.13361
fold change	1	0.000979455	0.00167085	0.00712144
	pum2 cko3 GAPDH	pum2 cko3 sox6	pum2 cko3 unc5c	pum2 cko3 emx1
	18.5728		27.2194	24.1117
	18.7552	28.8151	27.3141	24.1113
	18.7158	28.2542	27.6046	24.043
Mean	18.6813	28.5346	27.3794	24.0887
∆ CT	0	9.85336	8.69808	5.40741
fold change	1	0.00108104	0.00240777	0.0235618
	pum2 cko4 GAPDH	pum2 cko4 sox6	pum2 cko4 unc5c	pum2 cko4 emx1
	19.7123	29.5996	30.2724	28.0287
	19.9406	29.9705	30.0292	28.0468
		29.8304	30.4029	27.9727
Mean	19.8265	29.8002	30.2348	28.0161
∆ CT	0	9.97372	10.4084	8.18963
fold change	1	0.000994513	0.000735814	0.00342513
	pum2 cko5 GAPDH	pum2 cko5 sox6	pum2 cko5 unc5c	pum2 cko5 emx1
	18.8645	28.5791	28.1814	26.5931
	18.9162		28.4199	26.5384
		28.6333		26.5527
Mean	18.8903	28.6062	28.3006	26.5614
∆ CT	0	9.71586	9.41034	7.67112
fold change	1	0.00118914	0.00146962	0.00490641

## Sheet: hTDP43 A315T (b)
P0	CTs							P0 SA	Fold Change To GAPDH							Fold Change hTDP43 A315T to wt								Fold Change Wt to average WT
	W1 GAPDH	W1 sox6	W1 unc5c	W1 emx1					GAPDH	sox6	unc5c	emx1					GAPDH	sox6	unc5c	emx1					GAPDH	sox6	unc5c	emx1
	18.5896	27.3101	26.9839	24.6034				W1	1	0.00227801	0.00290009	0.013373				T1/WT	1	0.828096	0.760533	1.21182				wt1/WT	1	1.14358	1.27876	1.33857
	18.3235	26.9097	26.7552	24.6051				w2	1	0.00135636	0.00263281	0.0114245				T2/WT	1	0.444805	0.761389	0.705884				wt2/WT	1	0.680899	1.1609	1.14354
	18.1858	27.2132	26.6488	24.564				w3	1	0.00234769	0.00236591	0.0118792				T3/WT	1	0.935277	0.611163	0.965529				wt3/WT	1	1.17855	1.04322	1.18904
Mean	18.3663	27.1443	26.796	24.5908				w4	1	0.00258423	0.00255271	0.00928504				T4/WT	1	2.1359	1.85148	1.30492				wt4/WT	1	1.2973	1.12558	0.929383
∆ CT	0	8.77801	8.42969	6.22453				w5	1	0.0015737	0.00142714	0.00744564				Average	1	1.08602	0.996142	1.04704				WT5/WT	1	0.790006	0.62928	0.745269
fold change	1	0.00227801	0.00290009	0.013373				w6	1	0.00181208	0.00172872	0.00653584				stdev	0	0.257864	0.0864869	0.252998				WT6/WT	1	0.909672	0.762258	0.654203
								315t1	1	0.00164957	0.00172481	0.0121068				std error	0	0.128932	0.0432435	0.126499				Average	1	1	1	1
	W2 GAPDH	W2 sox6	W2 unc5c	W2 emx1				315t2	1	0.000886056	0.00172675	0.00705217				T-test	#DIV/0!	0.79131	0.988559	0.793017				stdev	0	0.242883	0.251073	0.268484
	19.0868	28.3085	27.065	25.098				315t3	1	0.00186308	0.00138606	0.00964617												std error	0	0.0991567	0.1025	0.109608
	18.3484	28.1146	27.336	25.2079				315t4	1	0.00425473	0.00419897	0.0130369
	18.6603	28.2505	27.402	25.1447
Mean	18.6985	28.2246	27.2677	25.1502
∆ CT	0	9.52605	8.56918	6.45172
fold change	1	0.00135636	0.00263281	0.0114245
	W3 GAPDH	W3 sox6	W3 unc5c	W3 emx1
	18.6978	27.0865	27.1928	24.7896
	17.9471	26.987	26.9015	24.6702
	18.2617		26.9825	24.633
Mean	18.3022	27.0367	27.0256	24.6976
∆ CT	0	8.73455	8.72339	6.39542
fold change	1	0.00234769	0.00236591	0.0118792
	w4 GAPDH	w4 sox6	w4 unc5c	w4 emx1
	18.6097	27.0599	26.847	24.9508
	17.863	26.9395		25.0845				Average WT	1	0.00199201	0.0022679	0.00999055
	18.2764	26.5377	26.8799	24.9664				Average315t	1	0.00216336	0.00225915	0.0104605
Mean	18.2497	26.8457	26.8634	25.0006				STDEV WT	0	0.000483826	0.000569408	0.0026823
∆ CT	0	8.59605	8.61376	6.75088				STDEV315t	0	0.00145596	0.0013031	0.00268499						GAPDH	sox6	unc5c	emx1
fold change	1	0.00258423	0.00255271	0.00928504				STD Erro WT	0	0.000197521	0.00023246	0.00109505					Average wt	1	1	1	1
								STD Error315t	0	0.000727981	0.000651548	0.0013425					Average 315T/WT	1	1.08602	0.996142	1.04704
	w5 GAPDH	w5 sox6	w5 unc5c	w5 emx1				T-Test	#DIV/0!	0.79131	0.988559	0.793017					std error wt	0	0.0991567	0.1025	0.109608
			27.5362	25.1881													std error 315T	0	0.128932	0.0432435	0.126499
	18.1005	27.2243	27.4269	25.0316
	18.0585	27.5579	27.6334	25.227
Mean	18.0795	27.3911	27.5321	25.1489
∆ CT	0	9.31162	9.45265	7.06939
fold change	1	0.0015737	0.00142714	0.00744564
	w6 GAPDH	w6 sox6	w6 unc5c	w6 emx1
		27.4871	27.0382	25.3266
	17.9157	27.0957	27.2442	25.3208
	18.15	26.8402	27.3444	25.2234
Mean	18.0329	27.141	27.2089	25.2903
∆ CT	0	9.10814	9.17608	7.25741
fold change	1	0.00181208	0.00172872	0.00653584
P0	CTs
	315t1 GAPDH	315t1 sox6	315t1 unc5c	315t1 emx1
	18.3961	27.232	27.2813	24.6228
	18.2499	27.6117	27.5405	24.7252
	18.2448	27.7781	27.607	24.6469
Mean	18.2969	27.5406	27.4763	24.665
∆ CT	0	9.24369	9.17934	6.36804
fold change	1	0.00164957	0.00172481	0.0121068
	315t2 GAPDH	315t2 sox6	315t2 unc5c	315t2 emx1
		28.7847	27.1068	25.322
	18.0206	28.3728	27.39	25.314
	18.2132	27.6142	27.3872	25.158
Mean	18.1169	28.2572	27.2947	25.2646
∆ CT	0	10.1403	9.17772	7.14772
fold change	1	0.000886056	0.00172675	0.00705217
	315t3 GAPDH	315t3 sox6	315t3 unc5c	315t3 emx1
	17.6653			24.2683
	17.9571	26.6075	27.0394	24.3335
	17.2884	26.8025	27.224	24.3964
Mean	17.6369	26.705	27.1317	24.3328
∆ CT	0	9.06809	9.4948	6.69583
fold change	1	0.00186308	0.00138606	0.00964617
	315T4 GAPDH	315T4 sox6	315T4 unc5c	315T4 emx1
	19.0129	26.8211	26.7582	25.1039
		26.6452	26.6693	25.1501
	18.641	26.6447	26.7406	25.0107
Mean	18.827	26.7037	26.7227	25.0882
∆ CT	0	7.87672	7.89575	6.26126
fold change	1	0.00425473	0.00419897	0.0130369
