# Supplementary material for: Pum2 and TDP-43 refine area-specific cytoarchitecture post-mitotically and modulate translation of Sox5, Bcl11b, and Rorb mRNAs in developing mouse neocortex
Source: eLife. 2022 Mar 9;11:e55199. doi: 10.7554/eLife.55199 (PMC8906809; doi:10.7554/eLife.55199)
Supplement: Source data 28. — Analysis of results of Western blot performed on nuclear fractions from three mice (N1–3) of Ctrl and Pum2 cKO for Emx1 protein. Quantification of corresponding fold changes in Emx1 protein levels normalized to total protein is shown below. Data are shown as means ± standard error of the mean (SEM), n = 3 of each genotype. two-tailed t-test. [file elife-55199-data28.xlsx]

## Sheet: Emx1 protein
	Emx1
	Image Name	Channel	Name	Signal	Total	Area	Bkgnd.	Type	signal-bck
	0000012_01	800	1	62.2	589	600	0.878	Signal	61.322
	0000012_01	800	2	53.3	367	369	0.85	Signal	52.45
	0000012_01	800	3	41.8	427	460	0.837	Signal	40.963
	0000012_01	800	7	51.7	331	344	0.812	Signal	50.888
	0000012_01	800	8	57.3	339	344	0.819	Signal	56.481
	0000012_01	800	9	53.7	412	441	0.812	Signal	52.888
	Total protein stain
	0000011_01	700	1	198000	437000	728	329	Signal	197671
	0000011_01	700	2	130000	267000	540	254	Signal	129746
	0000011_01	700	3	84000	245000	672	239	Signal	83761
	0000011_01	700	7	132000	357000	672	335	Signal	131665
	0000011_01	700	8	91000	241000	585	257	Signal	90743
	0000011_01	700	9	92200	237000	528	275	Signal	91925
	Emx1/Total protein
wt	0.000310223
wt	0.000404251
wt	0.000489046	Average wt	0.000401173
		error wt	5.16449e-05
cko	0.000386496
cko	0.000622428
cko	0.000575339	Average cko	0.000528088
		error CKO	7.2089e-05
	2tail	1tail
T-test	0.225633	0.112817
Fold Change
wt	0.773288
wt	1.00767
wt	1.21904	Average wt	1		Average wt	1
		error wt	0.128735		Average CKO	1.31636
					error wt	0.128735
					error CKO	0.179695
cko	0.963414
cko	1.55152
cko	1.43414	Average CKO	1.31636
		error CKO	0.179695
