# Supplementary material for: Pum2 and TDP-43 refine area-specific cytoarchitecture post-mitotically and modulate translation of Sox5, Bcl11b, and Rorb mRNAs in developing mouse neocortex
Source: eLife. 2022 Mar 9;11:e55199. doi: 10.7554/eLife.55199 (PMC8906809; doi:10.7554/eLife.55199)
Supplement: Source data 29. — Quantification of results of polysome profiling from P0 WT somatosensory area-enriched cortices neocortices for controls (Ctrl) and puromycin-treated samples (reviewers Figure 3). Histograms showing the distribution of the Sox5, Bcl11b, Rorb, Fezf2, GAPDH, and 18S mRNAs across polysome gradient fractions for puromycin-treated samples relative to controls. Values were normalized to an RLuc mRNA spike-in control, which was added in an equal amount to the fractions prior to RNA preparation. Data are represented as means ± standard error of the mean (SEM). *p≤0.05 by two-tailed t-test. [file elife-55199-data29.xlsx]

## Sheet: Sox5
Sox5	CTs																									% Sox5/Rluc
	ctrl1 F-1	ctrl1 F-2	ctrl1 F-3					ctrl1	1	2	3				Total		% in 1/3	% in 2/3	% in 3/3							F1 (0r)	F2 (1,2,3)	F3(>4)
	27.5734	27.6443	27.6039						Rluc																ctrl1	25.9661	9.88016	64.1537
	27.4976	27.7812	27.3078						1	2.15974	0.396773				3.55651		28.1174	60.7263	11.1562						ctrl2	22.6386	29.4263	47.9351
	27.2922	27.7872	27.5376						Sox5														100		ctrl3	50.2091	16.084	33.7068
Mean	27.4544	27.7376	27.4831					raw	1	0.821784	0.980293				2.80208		35.6878	29.3277	34.9845						puromycin 1	5.31697	25.7216	68.9614
∆ CT	0	0.283169	0.0287145					norm.	1	0.380502	2.47067				3.85117		25.9661	9.88016	64.1537				100		puromycin 2	7.4312	20.469	72.0998
fold change	1	0.821784	0.980293																				100		puromycin 3	40.8567	25.0604	34.083
								ctrl2	1	2	3				Total		% in 1/3	% in 2/3	% in 3/3						puromycin 4	28.8858	26.3786	44.7356
	ctrl2 F-1	ctrl2 F-2	ctrl2 F-3						Rluc
	28.4639	28.4583	29.0434						1	0.685492	0.318435				2.00393		49.902	34.2074	15.8905						Average ctrl Sox5	32.938	18.4635	48.5985
	28.2146	28.4025	28.8607						Sox5														100		Average puromycin Sox5	20.6227	24.4074	54.97
	28.1133		28.5936					raw	1	0.891022	0.674255				2.56528		38.9821	34.7339	26.2839						stdevctrl	15.0495	9.98795	15.2343
Mean	28.2639	28.4304	28.8326					norm.	1	1.29983	2.11741				4.41723		22.6386	29.4263	47.9351				100		Stdev puromycin	17.185	2.68018	18.5311
∆ CT	0	0.166467	0.568633																				100		std error ctrl	8.68885	5.76655	8.79551
fold change	1	0.891022	0.674255					ctrl3	1	2	3				Total		% in 1/3	% in 2/3	% in 3/3						std erro puromycin	8.5925	1.34009	9.26553
									Rluc
	ctrl3 F-1	ctrl3 F-2	ctrl3 F-3						1	6.21211	2.5763				9.78841		10.2162	63.4639	26.3199						T-Test	0.369702	0.294584	0.649806
	29.3163	28.5666	28.4268						Sox5														100
	29.5692	28.2533	28.6546					raw	1	1.98999	1.72954				4.71953		21.1885	42.165	36.6465							0.184851	0.147292	0.324903
	29.1806	28.268	28.6136					norm.	1	0.320341	0.671328				1.99167		50.2091	16.084	33.7068				100
Mean	29.3554	28.3626	28.565																				100
∆ CT	0	-0.992763	-0.79039
fold change	1	1.98999	1.72954					puromycin 1	1	2	3				Total		% in 1/3	% in 2/3	% in 3/3
									Rluc
									1	2.11858	0.968761				4.08734		24.4658	51.8327	23.7015				100
									Sox5
								raw	1	10.2489	12.5649				23.8138		4.19924	43.0377	52.763				100
	CTs							norm.	1	4.83765	12.9701				18.8077		5.31697	25.7216	68.9614				100
	puromycin 1 F-1	puromycin 1 F-2	puromycin 1 F-3
		27.4814						puromycin 2	1	2	3				Total		% in 1/3	% in 2/3	% in 3/3
	30.9159	27.6905	27.3607						Rluc
	31.1389	27.838	27.3914						1	0.494914	0.0467902				1.5417		64.8633	32.1017	3.03497				100
Mean	31.0274	27.67	27.376						Sox5
∆ CT	0	-3.3574	-3.65133					raw	1	1.36322	0.453973				2.8172		35.4963	48.3894	16.1144				100
fold change	1	10.2489	12.5649					norm.	1	2.75447	9.70232				13.4568		7.4312	20.469	72.0998				100
	puromycin 2 CxB-1	puromycin 2 CxB-2	puromycin 2 CxB-3					puromycin 3	1	2	3				Total		% in 1/3	% in 2/3	% in 3/3
	28.793	28.4543	29.6136						Rluc
	28.9574	28.3252	30.0319						1	2.68177	1.0047				4.68647		21.338	57.2236	21.4384				100
	28.8468	28.4767	30.3696						Sox5
Mean	28.8657	28.4187	30.0051					raw	1	1.64493	0.838131				3.48306		28.7104	47.2265	24.0631				100
∆ CT	0	-0.447023	1.13932					norm.	1	0.613374	0.834208				2.44758		40.8567	25.0604	34.083				100
fold change	1	1.36322	0.453973
								puromycin 4	1	2	3				Total		% in 1/3	% in 2/3	% in 3/3
	puromycin 3 F-1	puromycin 3 F-2	puromycin 3 F-3						Rluc
	29.7952	28.7639							1	0.894009	0.289038				2.18305		45.8075	40.9524	13.2401				100
	29.4657	28.8645	29.7031						Sox5
	29.297	28.7754	29.8449					raw	1	0.81641	0.447635				2.26405		44.1687	36.0598	19.7715				100
Mean	29.5193	28.8012	29.774					norm.	1	0.913201	1.54871				3.46191		28.8858	26.3786	44.7356				100
∆ CT	0	-0.718022	0.254752
fold change	1	1.64493	0.838131
	puromycin 4 F-1	puromycin 4 F-2	puromycin 4 F-3
	28.5062	28.9928	29.765
	28.87		29.8614
	28.7224	28.9915	29.951
Mean	28.6995	28.9921	29.8591
∆ CT	0	0.292633	1.15961
fold change	1	0.81641	0.447635
Rluc	CTs
	ctrl1 F-1	ctrl1 F-2	ctrl1 F-3
	21.3485	20.2696	22.684
	21.4428	20.2196	22.6251
	21.2591	20.2286	22.742
Mean	21.3501	20.2392	22.6837
∆ CT	0	-1.11086	1.33361
fold change	1	2.15974	0.396773
	ctrl2 F-1	ctrl2 F-2	ctrl2 F-3
	21.897	22.5543	23.5882
	22.0052	22.4568	23.7356
	21.9754	22.5009	23.5065
Mean	21.9592	22.504	23.6101
∆ CT	0	0.544788	1.65093
fold change	1	0.685492	0.318435
	ctrl3 F-1	ctrl3 F-2	ctrl3 F-3
	24.568	22.0893	23.2483
	24.7426	22.1052	23.2828
	24.6802	21.891	23.3638
Mean	24.6636	22.0285	23.2983
∆ CT	0	-2.63508	-1.3653
fold change	1	6.21211	2.5763
	CTs
	puromycin 1 F-1	puromycin 1 F-2	puromycin 1 F-3
	22.5545	21.3095	22.4588
	22.3982	21.2581	22.5834
	22.328	21.4637	22.3758
Mean	22.4269	21.3438	22.4727
∆ CT	0	-1.08309	0.0457878
fold change	1	2.11858	0.968761
	puromycin 2 CxB-1	puromycin 2 CxB-2	puromycin 2 CxB-3
	20.7149	21.743	25.2184
	20.7057	21.771	25.1054
	20.7336	21.6843	25.0832
Mean	20.718	21.7328	25.1357
∆ CT	0	1.01475	4.41765
fold change	1	0.494914	0.0467902
	puromycin 3 F-1	puromycin 3 F-2	puromycin 3 F-3
	22.8133	21.3511	22.8544
	22.7861	21.3313	22.8366
	22.7937	21.4411	22.6818
Mean	22.7977	21.3745	22.7909
∆ CT	0	-1.42318	-0.00676854
fold change	1	2.68177	1.0047
	puromycin 4 F-1	puromycin 4 F-2	puromycin 4 F-3
	21.0461		23.0945
	21.3602	21.491	23.098
	21.5106	21.4435
Mean	21.3056	21.4673	23.0963
∆ CT	0	0.161638	1.79067
fold change	1	0.894009	0.289038

## Sheet: Ctip2 
ctip2	CTs																									% Ctip2/Rluc
	ctrl1 F-1	ctrl1 F-2	ctrl1 F-3					ctrl1	1	2	3				Total		% in 1/3	% in 2/3	% in 3/3							F1 (0r)	F2 (1,2,3)	F3(>4)
	26.2196	27.2025	25.3365						Rluc																ctrl1	16.1495	4.15844	79.6921
	26.3242	27.2052	25.3102						1	2.15974	0.396773				3.55651		28.1174	60.7263	11.1562						ctrl2	6.31539	24.0884	69.5962
	26.499	27.1746	25.4881						ctip2														100		ctrl3	24.5895	9.15287	66.2576
Mean	26.3476	27.1941	25.3783					raw	1	0.556125	1.95794				3.51406		28.4571	15.8257	55.7172						puromycin 1	1.97025	17.1049	80.9249
∆ CT	0	0.846518	-0.969333					norm.	1	0.257497	4.93465				6.19215		16.1495	4.15844	79.6921				100		puromycin 2	2.32937	12.2209	85.4498
fold change	1	0.556125	1.95794																				100		puromycin 3	16.6495	16.4734	66.8771
								ctrl2	1	2	3				Total		% in 1/3	% in 2/3	% in 3/3						puromycin 4	18.5638	25.0463	56.39
	ctrl2 F-1	ctrl2 F-2	ctrl2 F-3						Rluc
	28.2454	27.1551	26.8436						1	0.685492	0.318435				2.00393		49.902	34.2074	15.8905						Average ctrl ctip2	15.6848	12.4666	71.8486
	28.3689	27.1744	26.7407						ctip2														100		Average puromycin ctip2	9.87822	17.7114	72.4104
	29.1956	27.3206						raw	1	2.61463	3.50918				7.12381		14.0374	36.7027	49.2598						stdevctrl	9.14591	10.37	6.99472
Mean	28.6033	27.2167	26.7922					norm.	1	3.81424	11.0201				15.8343		6.31539	24.0884	69.5962				100		Stdev puromycin	8.95936	5.34935	13.289
∆ CT	0	-1.38661	-1.81113																				100		std error ctrl	5.28039	5.98712	4.03841
fold change	1	2.61463	3.50918					ctrl3	1	2	3				Total		% in 1/3	% in 2/3	% in 3/3						std erro puromycin	4.47968	2.67468	6.64451
									Rluc
	ctrl3 F-1	ctrl3 F-2	ctrl3 F-3						1	6.21211	2.5763				9.78841		10.2162	63.4639	26.3199						T-Test	0.438444	0.416596	0.9502
	28.6607	27.5349	25.8897						ctip2														100
	28.8701	27.5569	26.017					raw	1	2.31231	6.94197				10.2543		9.75202	22.5497	67.6982							0.219222	0.208298	0.4751
		27.5763	26.0033					norm.	1	0.372227	2.69455				4.06678		24.5895	9.15287	66.2576				100
Mean	28.7654	27.556	25.97																				100
∆ CT	0	-1.20934	-2.79534
fold change	1	2.31231	6.94197					puromycin 1	1	2	3				Total		% in 1/3	% in 2/3	% in 3/3
									Rluc
									1	2.11858	0.968761				4.08734		24.4658	51.8327	23.7015				100
									ctip2
								raw	1	18.3926	39.7904				59.183		1.68968	31.0775	67.2328				100
	CTs							norm.	1	8.68159	41.0735				50.7551		1.97025	17.1049	80.9249				100
	puromycin 1 F-1	puromycin 1 F-2	puromycin 1 F-3
	30.2388	26.1097	24.9921					puromycin 2	1	2	3				Total		% in 1/3	% in 2/3	% in 3/3
	30.4438	26.1708	25.0617						Rluc
									1	0.494914	0.0467902				1.5417		64.8633	32.1017	3.03497				100
Mean	30.3413	26.1402	25.0269						ctip2
∆ CT	0	-4.20105	-5.31435					raw	1	2.59652	1.71643				5.31296		18.8219	48.8715	32.3065				100
fold change	1	18.3926	39.7904					norm.	1	5.24642	36.6836				42.93		2.32937	12.2209	85.4498				100
	puromycin 2 CxB-1	puromycin 2 CxB-2	puromycin 2 CxB-3					puromycin 3	1	2	3				Total		% in 1/3	% in 2/3	% in 3/3
	29.0482	27.5617	28.2124						Rluc
	29.1363	27.7588	28.1902						1	2.68177	1.0047				4.68647		21.338	57.2236	21.4384				100
	28.926		28.3697						ctip2
Mean	29.0368	27.6603	28.2574					raw	1	2.6534	4.03565				7.68905		13.0055	34.5089	52.4856				100
∆ CT	0	-1.37658	-0.779413					norm.	1	0.989424	4.01676				6.00618		16.6495	16.4734	66.8771				100
fold change	1	2.59652	1.71643
								puromycin 4	1	2	3				Total		% in 1/3	% in 2/3	% in 3/3
	puromycin 3 F-1	puromycin 3 F-2	puromycin 3 F-3						Rluc
	29.6966	28.1093	27.5293						1	0.894009	0.289038				2.18305		45.8075	40.9524	13.2401				100
	29.5106		27.538						ctip2
		28.2821	27.7051					raw	1	1.2062	0.877992				3.08419		32.4234	39.1091	28.4675				100
Mean	29.6036	28.1957	27.5908					norm.	1	1.3492	3.03764				5.38684		18.5638	25.0463	56.39				100
∆ CT	0	-1.40784	-2.0128
fold change	1	2.6534	4.03565
	puromycin 4 F-1	puromycin 4 F-2	puromycin 4 F-3
	28.3435	28.2199	28.635
	28.5003	28.083	28.4582
			28.7356
Mean	28.4219	28.1514	28.6096
∆ CT	0	-0.270469	0.18772
fold change	1	1.2062	0.877992
Rluc	CTs
	ctrl1 F-1	ctrl1 F-2	ctrl1 F-3
	21.3485	20.2696	22.684
	21.4428	20.2196	22.6251
	21.2591	20.2286	22.742
Mean	21.3501	20.2392	22.6837
∆ CT	0	-1.11086	1.33361
fold change	1	2.15974	0.396773
	ctrl2 F-1	ctrl2 F-2	ctrl2 F-3
	21.897	22.5543	23.5882
	22.0052	22.4568	23.7356
	21.9754	22.5009	23.5065
Mean	21.9592	22.504	23.6101
∆ CT	0	0.544788	1.65093
fold change	1	0.685492	0.318435
	ctrl3 F-1	ctrl3 F-2	ctrl3 F-3
	24.568	22.0893	23.2483
	24.7426	22.1052	23.2828
	24.6802	21.891	23.3638
Mean	24.6636	22.0285	23.2983
∆ CT	0	-2.63508	-1.3653
fold change	1	6.21211	2.5763
	CTs
	puromycin 1 F-1	puromycin 1 F-2	puromycin 1 F-3
	22.5545	21.3095	22.4588
	22.3982	21.2581	22.5834
	22.328	21.4637	22.3758
Mean	22.4269	21.3438	22.4727
∆ CT	0	-1.08309	0.0457878
fold change	1	2.11858	0.968761
	puromycin 2 CxB-1	puromycin 2 CxB-2	puromycin 2 CxB-3
	20.7149	21.743	25.2184
	20.7057	21.771	25.1054
	20.7336	21.6843	25.0832
Mean	20.718	21.7328	25.1357
∆ CT	0	1.01475	4.41765
fold change	1	0.494914	0.0467902
	puromycin 3 F-1	puromycin 3 F-2	puromycin 3 F-3
	22.8133	21.3511	22.8544
	22.7861	21.3313	22.8366
	22.7937	21.4411	22.6818
Mean	22.7977	21.3745	22.7909
∆ CT	0	-1.42318	-0.00676854
fold change	1	2.68177	1.0047
	puromycin 4 F-1	puromycin 4 F-2	puromycin 4 F-3
	21.0461		23.0945
	21.3602	21.491	23.098
	21.5106	21.4435
Mean	21.3056	21.4673	23.0963
∆ CT	0	0.161638	1.79067
fold change	1	0.894009	0.289038

## Sheet: Rorb 
rorb	CTs																									% rorb/Rluc
	ctrl1 F-1	ctrl1 F-2	ctrl1 F-3					ctrl1	1	2	3				Total		% in 1/3	% in 2/3	% in 3/3							F1 (0r)	F2 (1,2,3)	F3(>4)
	28.1525	27.6018	28.0541						Rluc																ctrl1	25.1373	15.6423	59.2204
	28.0869	27.6793	28.1078						1	2.15974	0.396773				3.55651		28.1174	60.7263	11.1562						ctrl2	21.3146	37.4458	41.2395
	27.9726	27.6514	28.3422						rorb														100		ctrl3	31.3857	22.5552	46.0591
Mean	28.0707	27.6442	28.168					raw	1	1.34395	0.934749				3.2787		30.4999	40.9903	28.5098						puromycin 1	8.65973	21.7299	69.6104
∆ CT	0	-0.426476	0.0973498					norm.	1	0.622273	2.35588				3.97815		25.1373	15.6423	59.2204				100		puromycin 2	9.62705	35.0887	55.2842
fold change	1	1.34395	0.934749																				100		puromycin 3	18.8865	30.8847	50.2288
								ctrl2	1	2	3				Total		% in 1/3	% in 2/3	% in 3/3						puromycin 4	20.5048	35.3784	44.1168
	ctrl2 F-1	ctrl2 F-2	ctrl2 F-3						Rluc
	29.364		30.3467						1	0.685492	0.318435				2.00393		49.902	34.2074	15.8905						Average ctrl rorb	25.9459	25.2144	48.8397
	28.8588	28.8287	29.8523						rorb														100		Average puromycin rorb	14.4195	30.7704	54.8101
	29.0249	28.8	29.1448					raw	1	1.20428	0.616108				2.82039		35.4561	42.6992	21.8448						stdevctrl	5.08401	11.1424	9.30735
Mean	29.0825	28.8144	29.7813					norm.	1	1.75681	1.9348				4.69162		21.3146	37.4458	41.2395				100		Stdev puromycin	6.14077	6.36725	10.8721
∆ CT	0	-0.268174	0.698746																				100		std error ctrl	2.93525	6.43306	5.3736
fold change	1	1.20428	0.616108					ctrl3	1	2	3				Total		% in 1/3	% in 2/3	% in 3/3						std erro puromycin	3.07039	3.18362	5.43605
									Rluc
	ctrl3 F-1	ctrl3 F-2	ctrl3 F-3						1	6.21211	2.5763				9.78841		10.2162	63.4639	26.3199						T-Test	0.046616	0.436298	0.481098
	30.8548		28.9474						rorb														100
		28.6795	28.7273					raw	1	4.4643	3.78077				9.24506		10.8166	48.2884	40.895							0.023308	0.218149	0.240549
	30.754	28.6123	28.9824					norm.	1	0.718644	1.46752				3.18616		31.3857	22.5552	46.0591				100
Mean	30.8044	28.6459	28.8857																				100
∆ CT	0	-2.15843	-1.91868
fold change	1	4.4643	3.78077					puromycin 1	1	2	3				Total		% in 1/3	% in 2/3	% in 3/3
									Rluc
									1	2.11858	0.968761				4.08734		24.4658	51.8327	23.7015				100
									rorb
								raw	1	5.31615	7.78729				14.1034		7.09047	37.694	55.2155				100
	CTs							norm.	1	2.5093	8.0384				11.5477		8.65973	21.7299	69.6104				100
	puromycin 1 F-1	puromycin 1 F-2	puromycin 1 F-3
	30.7666	28.3802	27.8763					puromycin 2	1	2	3				Total		% in 1/3	% in 2/3	% in 3/3
	30.755	28.3676	27.9809						Rluc
	30.8353	28.3779	27.6164						1	0.494914	0.0467902				1.5417		64.8633	32.1017	3.03497				100
Mean	30.7856	28.3752	27.8245						rorb
∆ CT	0	-2.41038	-2.96112					raw	1	1.80387	0.268697				3.07256		32.5461	58.7088	8.74505				100
fold change	1	5.31615	7.78729					norm.	1	3.64481	5.74259				10.3874		9.62705	35.0887	55.2842				100
	puromycin 2 CxB-1	puromycin 2 CxB-2	puromycin 2 CxB-3					puromycin 3	1	2	3				Total		% in 1/3	% in 2/3	% in 3/3
	29.0944								Rluc
	29.2116	28.2559	30.9012						1	2.68177	1.0047				4.68647		21.338	57.2236	21.4384				100
	28.9575	28.2176	31.0664						rorb
Mean	29.0879	28.2368	30.9838					raw	1	4.38543	2.67201				8.05745		12.4109	54.4271	33.162				100
∆ CT	0	-0.851091	1.89595					norm.	1	1.63528	2.65951				5.29478		18.8865	30.8847	50.2288				100
fold change	1	1.80387	0.268697
								puromycin 4	1	2	3				Total		% in 1/3	% in 2/3	% in 3/3
	puromycin 3 F-1	puromycin 3 F-2	puromycin 3 F-3						Rluc
	30.8	28.8755	29.538						1	0.894009	0.289038				2.18305		45.8075	40.9524	13.2401				100
	31.0744	28.8712	29.6793						rorb
	31.1437		29.5471					raw	1	1.5425	0.621877				3.16438		31.6018	48.7458	19.6524				100
Mean	31.0061	28.8733	29.5881					norm.	1	1.72538	2.15154				4.87692		20.5048	35.3784	44.1168				100
∆ CT	0	-2.13272	-1.41793
fold change	1	4.38543	2.67201
	puromycin 4 F-1	puromycin 4 F-2	puromycin 4 F-3
	29.413	28.7971	30.0483
	29.437	29.0017	30.2213
	29.4985	28.6738
Mean	29.4495	28.8242	30.1348
∆ CT	0	-0.625272	0.6853
fold change	1	1.5425	0.621877
Rluc	CTs
	ctrl1 F-1	ctrl1 F-2	ctrl1 F-3
	21.3485	20.2696	22.684
	21.4428	20.2196	22.6251
	21.2591	20.2286	22.742
Mean	21.3501	20.2392	22.6837
∆ CT	0	-1.11086	1.33361
fold change	1	2.15974	0.396773
	ctrl2 F-1	ctrl2 F-2	ctrl2 F-3
	21.897	22.5543	23.5882
	22.0052	22.4568	23.7356
	21.9754	22.5009	23.5065
Mean	21.9592	22.504	23.6101
∆ CT	0	0.544788	1.65093
fold change	1	0.685492	0.318435
	ctrl3 F-1	ctrl3 F-2	ctrl3 F-3
	24.568	22.0893	23.2483
	24.7426	22.1052	23.2828
	24.6802	21.891	23.3638
Mean	24.6636	22.0285	23.2983
∆ CT	0	-2.63508	-1.3653
fold change	1	6.21211	2.5763
	CTs
	puromycin 1 F-1	puromycin 1 F-2	puromycin 1 F-3
	22.5545	21.3095	22.4588
	22.3982	21.2581	22.5834
	22.328	21.4637	22.3758
Mean	22.4269	21.3438	22.4727
∆ CT	0	-1.08309	0.0457878
fold change	1	2.11858	0.968761
	puromycin 2 CxB-1	puromycin 2 CxB-2	puromycin 2 CxB-3
	20.7149	21.743	25.2184
	20.7057	21.771	25.1054
	20.7336	21.6843	25.0832
Mean	20.718	21.7328	25.1357
∆ CT	0	1.01475	4.41765
fold change	1	0.494914	0.0467902
	puromycin 3 F-1	puromycin 3 F-2	puromycin 3 F-3
	22.8133	21.3511	22.8544
	22.7861	21.3313	22.8366
	22.7937	21.4411	22.6818
Mean	22.7977	21.3745	22.7909
∆ CT	0	-1.42318	-0.00676854
fold change	1	2.68177	1.0047
	puromycin 4 F-1	puromycin 4 F-2	puromycin 4 F-3
	21.0461		23.0945
	21.3602	21.491	23.098
	21.5106	21.4435
Mean	21.3056	21.4673	23.0963
∆ CT	0	0.161638	1.79067
fold change	1	0.894009	0.289038

## Sheet: Fezf2
fezf2	CTs																									%fezf2/Rluc
	ctrl1 F-1	ctrl1 F-2	ctrl1 F-3					ctrl1	1	2	3				Total		% in 1/3	% in 2/3	% in 3/3							F1 (0r)	F2 (1,2,3)	F3(>4)
	26.1003	25.3676	27.4554						Rluc																ctrl1	35.5756	27.0814	37.3429
	26.3512	25.6231							1	2.15974	0.396773				3.55651		28.1174	60.7263	11.1562						ctrl2	31.6398	35.5174	32.8428
	26.2629	25.5719	27.5482						fezf2														100		ctrl3	58.2746	15.775	25.9504
Mean	26.2381	25.5209	27.5018					raw	1	1.64407	0.416483				3.06055		32.6738	53.718	13.6081						puromycin 1	22.7977	43.8306	33.3717
∆ CT	0	-0.717271	1.26367					norm.	1	0.761235	1.04968				2.81091		35.5756	27.0814	37.3429				100		puromycin 2	15.8099	40.3691	43.821
fold change	1	1.64407	0.416483																				100		puromycin 3	40.0611	26.3576	33.5813
								ctrl2	1	2	3				Total		% in 1/3	% in 2/3	% in 3/3						puromycin 4	27.062	40.4927	32.4453
	ctrl2 F-1	ctrl2 F-2	ctrl2 F-3						Rluc
	28.4065	28.5453	30.0454						1	0.685492	0.318435				2.00393		49.902	34.2074	15.8905						Average ctrl fezf2	41.83	26.1246	32.0454
		29.1134	30.0971						fezf2														100		Average puromycin fezf2	26.4327	37.7625	35.8048
	28.5418	28.8978						raw	1	0.769502	0.330543				2.10004		47.618	36.6422	15.7398						stdevctrl	14.3768	9.90591	5.73799
Mean	28.4742	28.8522	30.0712					norm.	1	1.12255	1.03802				3.16058		31.6398	35.5174	32.8428				100		Stdev puromycin	10.2011	7.77048	5.36688
∆ CT	0	0.378002	1.59709																				100		std error ctrl	8.30044	5.71918	3.31283
fold change	1	0.769502	0.330543					ctrl3	1	2	3				Total		% in 1/3	% in 2/3	% in 3/3						std erro puromycin	5.10053	3.88524	2.68344
									Rluc
	ctrl3 F-1	ctrl3 F-2	ctrl3 F-3						1	6.21211	2.5763				9.78841		10.2162	63.4639	26.3199						T-Test	0.15508	0.139819	0.413264
	29.5404	28.5764	29.3058						fezf2														100
		28.9275	29.273					raw	1	1.68162	1.14726				3.82888		26.1173	43.9195	29.9632							0.0775398	0.0699094	0.206632
	29.4438	28.7229	29.3029					norm.	1	0.270701	0.445312				1.71601		58.2746	15.775	25.9504				100
Mean	29.4921	28.7422	29.2939																				100
∆ CT	0	-0.749854	-0.198188
fold change	1	1.68162	1.14726					puromycin 1	1	2	3				Total		% in 1/3	% in 2/3	% in 3/3
									Rluc
									1	2.11858	0.968761				4.08734		24.4658	51.8327	23.7015				100
									fezf2
								raw	1	4.07315	1.41809				6.49124		15.4054	62.7484	21.8462				100
	CTs							norm.	1	1.92259	1.46382				4.38641		22.7977	43.8306	33.3717				100
	puromycin 1 F-1	puromycin 1 F-2	puromycin 1 F-3
	28.3423	26.1464	27.7269					puromycin 2	1	2	3				Total		% in 1/3	% in 2/3	% in 3/3
	28.301	26.4215	28.1542						Rluc
	28.2469	26.2439	27.4973						1	0.494914	0.0467902				1.5417		64.8633	32.1017	3.03497				100
Mean	28.2967	26.2706	27.7928						fezf2
∆ CT	0	-2.02615	-0.503947					raw	1	1.26372	0.129691				2.39341		41.7814	52.7999	5.41866				100
fold change	1	4.07315	1.41809					norm.	1	2.55341	2.77175				6.32516		15.8099	40.3691	43.821				100
	puromycin 2 CxB-1	puromycin 2 CxB-2	puromycin 2 CxB-3					puromycin 3	1	2	3				Total		% in 1/3	% in 2/3	% in 3/3
	28.6448	28.5803							Rluc
	29.1261	28.8092	31.7293						1	2.68177	1.0047				4.68647		21.338	57.2236	21.4384				100
	28.9183	28.2868	31.9573						fezf2
Mean	28.8964	28.5587	31.8433					raw	1	1.76443	0.842195				3.60663		27.7267	48.922	23.3513				100
∆ CT	0	-0.337674	2.94685					norm.	1	0.657937	0.838253				2.49619		40.0611	26.3576	33.5813				100
fold change	1	1.26372	0.129691
								puromycin 4	1	2	3				Total		% in 1/3	% in 2/3	% in 3/3
	puromycin 3 F-1	puromycin 3 F-2	puromycin 3 F-3						Rluc
	29.8235		29.8549						1	0.894009	0.289038				2.18305		45.8075	40.9524	13.2401				100
	29.8233	28.9032	30.1996						fezf2
	29.7538	29.0589	30.0895					raw	1	1.3377	0.346535				2.68424		37.2545	49.8355	12.91				100
Mean	29.8002	28.981	30.048					norm.	1	1.4963	1.19893				3.69522		27.062	40.4927	32.4453				100
∆ CT	0	-0.819205	0.247773
fold change	1	1.76443	0.842195
	puromycin 4 F-1	puromycin 4 F-2	puromycin 4 F-3
	28.8629	28.7493
	29.5535	28.8261	30.7699
	29.1608	28.7427	30.6729
Mean	29.1924	28.7727	30.7214
∆ CT	0	-0.419757	1.52893
fold change	1	1.3377	0.346535
Rluc	CTs
	ctrl1 F-1	ctrl1 F-2	ctrl1 F-3
	21.3485	20.2696	22.684
	21.4428	20.2196	22.6251
	21.2591	20.2286	22.742
Mean	21.3501	20.2392	22.6837
∆ CT	0	-1.11086	1.33361
fold change	1	2.15974	0.396773
	ctrl2 F-1	ctrl2 F-2	ctrl2 F-3
	21.897	22.5543	23.5882
	22.0052	22.4568	23.7356
	21.9754	22.5009	23.5065
Mean	21.9592	22.504	23.6101
∆ CT	0	0.544788	1.65093
fold change	1	0.685492	0.318435
	ctrl3 F-1	ctrl3 F-2	ctrl3 F-3
	24.568	22.0893	23.2483
	24.7426	22.1052	23.2828
	24.6802	21.891	23.3638
Mean	24.6636	22.0285	23.2983
∆ CT	0	-2.63508	-1.3653
fold change	1	6.21211	2.5763
	CTs
	puromycin 1 F-1	puromycin 1 F-2	puromycin 1 F-3
	22.5545	21.3095	22.4588
	22.3982	21.2581	22.5834
	22.328	21.4637	22.3758
Mean	22.4269	21.3438	22.4727
∆ CT	0	-1.08309	0.0457878
fold change	1	2.11858	0.968761
	puromycin 2 CxB-1	puromycin 2 CxB-2	puromycin 2 CxB-3
	20.7149	21.743	25.2184
	20.7057	21.771	25.1054
	20.7336	21.6843	25.0832
Mean	20.718	21.7328	25.1357
∆ CT	0	1.01475	4.41765
fold change	1	0.494914	0.0467902
	puromycin 3 F-1	puromycin 3 F-2	puromycin 3 F-3
	22.8133	21.3511	22.8544
	22.7861	21.3313	22.8366
	22.7937	21.4411	22.6818
Mean	22.7977	21.3745	22.7909
∆ CT	0	-1.42318	-0.00676854
fold change	1	2.68177	1.0047
	puromycin 4 F-1	puromycin 4 F-2	puromycin 4 F-3
	21.0461		23.0945
	21.3602	21.491	23.098
	21.5106	21.4435
Mean	21.3056	21.4673	23.0963
∆ CT	0	0.161638	1.79067
fold change	1	0.894009	0.289038

## Sheet: 18s
18s	CTs																									% 18s/Rluc
	ctrl1 F-1	ctrl1 F-2	ctrl1 F-3					ctrl1	1	2	3				Total		% in 1/3	% in 2/3	% in 3/3							F1 (0r)	F2 (1,2,3)	F3(>4)
		5.96126	9.7803						Rluc																ctrl1	21.8855	53.5767	24.5378
	8.67929	6.45161	10.1784						1	2.15974	0.396773				3.55651		28.1174	60.7263	11.1562						ctrl2	10.4398	85.8095	3.75068
	8.94223	6.81194							18s														100		ctrl3	22.4079	54.1954	23.3967
Mean	8.81076	6.40827	9.97934					raw	1	5.28714	0.444858				6.732		14.8544	78.5375	6.60811						puromycin 1	25.2419	62.6005	12.1576
∆ CT	0	-2.40249	1.16858					norm.	1	2.44805	1.12119				4.56924		21.8855	53.5767	24.5378				100		puromycin 2	10.5053	63.6627	25.8319
fold change	1	5.28714	0.444858																				100		puromycin 3	26.0877	56.4601	17.4522
								ctrl2	1	2	3				Total		% in 1/3	% in 2/3	% in 3/3						puromycin 4	19.601	63.8557	16.5433
	ctrl2 F-1	ctrl2 F-2	ctrl2 F-3						Rluc
		7.69974	13.4418						1	0.685492	0.318435				2.00393		49.902	34.2074	15.8905						Average ctrl 18s	18.2444	64.5272	17.2284
	10.0855	7.67455							18s														100		Average puromycin 18s	20.359	61.6448	17.9963
	10.2773		13.1766					raw	1	5.63437	0.114403				6.74877		14.8175	83.4873	1.69517						stdevctrl	6.764	18.4336	11.686
Mean	10.1814	7.68714	13.3092					norm.	1	8.21945	0.359267				9.57872		10.4398	85.8095	3.75068				100		Stdev puromycin	7.1724	3.50019	5.71241
∆ CT	0	-2.49425	3.1278																				100		std error ctrl	3.9052	10.6426	6.74691
fold change	1	5.63437	0.114403					ctrl3	1	2	3				Total		% in 1/3	% in 2/3	% in 3/3						std erro puromycin	3.5862	1.7501	2.85621
									Rluc
	ctrl3 F-1	ctrl3 F-2	ctrl3 F-3						1	6.21211	2.5763				9.78841		10.2162	63.4639	26.3199						T-Test	0.709233	0.765267	0.911633
	11.1659	7.45701	9.58895						18s														100
		7.60661	9.9469					raw	1	15.0246	2.68999				18.7145		5.34344	80.2828	14.3738							0.354617	0.382634	0.455816
	11.6303	7.40296	10.3757					norm.	1	2.41859	1.04413				4.46272		22.4079	54.1954	23.3967				100
Mean	11.3981	7.48886	9.97051																				100
∆ CT	0	-3.90925	-1.4276
fold change	1	15.0246	2.68999					puromycin 1	1	2	3				Total		% in 1/3	% in 2/3	% in 3/3
									Rluc
									1	2.11858	0.968761				4.08734		24.4658	51.8327	23.7015				100
									18s
								raw	1	5.25411	0.466596				6.72071		14.8794	78.1779	6.94266				100
	CTs							norm.	1	2.48002	0.481642				3.96166		25.2419	62.6005	12.1576				100
	puromycin 1 F-1	puromycin 1 F-2	puromycin 1 F-3
	10.6896		11.5804					puromycin 2	1	2	3				Total		% in 1/3	% in 2/3	% in 3/3
	10.434	8.09269	11.7426						Rluc
		8.24395							1	0.494914	0.0467902				1.5417		64.8633	32.1017	3.03497				100
Mean	10.5618	8.16832	11.6615						18s
∆ CT	0	-2.39345	1.09975					raw	1	2.9992	0.115054				4.11425		24.3058	72.8978	2.79647				100
fold change	1	5.25411	0.466596					norm.	1	6.06004	2.45893				9.51897		10.5053	63.6627	25.8319				100
	puromycin 2 CxB-1	puromycin 2 CxB-2	puromycin 2 CxB-3					puromycin 3	1	2	3				Total		% in 1/3	% in 2/3	% in 3/3
	9.0782	8.00682	12.3287						Rluc
	9.20128	7.58259	12.19						1	2.68177	1.0047				4.68647		21.338	57.2236	21.4384				100
		7.07609							18s
Mean	9.13974	7.55517	12.2594					raw	1	5.804	0.672128				7.47613		13.3759	77.6338	8.99032				100
∆ CT	0	-1.58458	3.11962					norm.	1	2.16425	0.668982				3.83323		26.0877	56.4601	17.4522				100
fold change	1	2.9992	0.115054
								puromycin 4	1	2	3				Total		% in 1/3	% in 2/3	% in 3/3
	puromycin 3 F-1	puromycin 3 F-2	puromycin 3 F-3						Rluc
	11.0589	8.5885							1	0.894009	0.289038				2.18305		45.8075	40.9524	13.2401				100
	11.1218	8.46723	11.7535						18s
	11.014		11.5227					raw	1	2.91248	0.243949				4.15643		24.0591	70.0717	5.8692				100
Mean	11.0649	8.52787	11.6381					norm.	1	3.25778	0.844004				5.10178		19.601	63.8557	16.5433				100
∆ CT	0	-2.53705	0.573191
fold change	1	5.804	0.672128
	puromycin 4 F-1	puromycin 4 F-2	puromycin 4 F-3
	9.40515		11.3732
	9.42288	7.81213	11.4135
	9.494	7.98472	11.6413
Mean	9.44068	7.89843	11.476
∆ CT	0	-1.54225	2.03535
fold change	1	2.91248	0.243949
Rluc	CTs
	ctrl1 F-1	ctrl1 F-2	ctrl1 F-3
	21.3485	20.2696	22.684
	21.4428	20.2196	22.6251
	21.2591	20.2286	22.742
Mean	21.3501	20.2392	22.6837														0
∆ CT	0	-1.11086	1.33361
fold change	1	2.15974	0.396773
	ctrl2 F-1	ctrl2 F-2	ctrl2 F-3
	21.897	22.5543	23.5882
	22.0052	22.4568	23.7356
	21.9754	22.5009	23.5065
Mean	21.9592	22.504	23.6101
∆ CT	0	0.544788	1.65093
fold change	1	0.685492	0.318435
	ctrl3 F-1	ctrl3 F-2	ctrl3 F-3
	24.568	22.0893	23.2483
	24.7426	22.1052	23.2828
	24.6802	21.891	23.3638
Mean	24.6636	22.0285	23.2983
∆ CT	0	-2.63508	-1.3653
fold change	1	6.21211	2.5763
	CTs
	puromycin 1 F-1	puromycin 1 F-2	puromycin 1 F-3
	22.5545	21.3095	22.4588
	22.3982	21.2581	22.5834
	22.328	21.4637	22.3758
Mean	22.4269	21.3438	22.4727
∆ CT	0	-1.08309	0.0457878
fold change	1	2.11858	0.968761
	puromycin 2 CxB-1	puromycin 2 CxB-2	puromycin 2 CxB-3
	20.7149	21.743	25.2184
	20.7057	21.771	25.1054
	20.7336	21.6843	25.0832
Mean	20.718	21.7328	25.1357
∆ CT	0	1.01475	4.41765
fold change	1	0.494914	0.0467902
	puromycin 3 F-1	puromycin 3 F-2	puromycin 3 F-3
	22.8133	21.3511	22.8544
	22.7861	21.3313	22.8366
	22.7937	21.4411	22.6818
Mean	22.7977	21.3745	22.7909
∆ CT	0	-1.42318	-0.00676854
fold change	1	2.68177	1.0047
	puromycin 4 F-1	puromycin 4 F-2	puromycin 4 F-3
	21.0461		23.0945
	21.3602	21.491	23.098
	21.5106	21.4435
Mean	21.3056	21.4673	23.0963
∆ CT	0	0.161638	1.79067
fold change	1	0.894009	0.289038

## Sheet: GAPDH
GAPDH	CTs																									% GAPDH/Rluc
	ctrl1 F-1	ctrl1 F-2	ctrl1 F-3					ctrl1	1	2	3				Total		% in 1/3	% in 2/3	% in 3/3							F1 (0r)	F2 (1,2,3)	F3(>4)
	21.5425		21.1821						Rluc																ctrl1	13.5283	38.9333	47.5384
	21.5616	19.0003	21.0609						1	2.15974	0.396773				3.55651		28.1174	60.7263	11.1562						ctrl2	52.3326	31.0804	16.587
		18.8321	20.9746						GAPDH														100		ctrl3	72.2504	6.15968	21.5899
Mean	21.552	18.9162	21.0725					raw	1	6.21553	1.39426				8.60979		11.6147	72.1915	16.1938						puromycin 1	37.845	21.3768	40.7782
∆ CT	0	-2.63588	-0.479495					norm.	1	2.87791	3.51399				7.3919		13.5283	38.9333	47.5384				100		puromycin 2	24.3023	28.0308	47.6669
fold change	1	6.21553	1.39426																				100		puromycin 3	58.8318	20.9182	20.25
								ctrl2	1	2	3				Total		% in 1/3	% in 2/3	% in 3/3						puromycin 4	57.8267	23.6901	18.4832
	ctrl2 F-1	ctrl2 F-2	ctrl2 F-3						Rluc
	19.9847								1	0.685492	0.318435				2.00393		49.902	34.2074	15.8905						Average ctrl GAPDH	46.0371	25.3911	28.5718
	20.4156	21.7962	23.5257						GAPDH														100		Average puromycin GAPDH	44.7014	23.504	31.7946
	20.8123	21.6051	23.8998					raw	1	0.407114	0.100929				1.50804		66.3111	26.9962	6.69271						stdevctrl	29.863	17.1115	16.615
Mean	20.4042	21.7007	23.7128					norm.	1	0.593901	0.316953				1.91085		52.3326	31.0804	16.587				100		Stdev puromycin	16.6841	3.25259	14.6413
∆ CT	0	1.29649	3.30859																				100		std error ctrl	17.2414	9.87933	9.59265
fold change	1	0.407114	0.100929					ctrl3	1	2	3				Total		% in 1/3	% in 2/3	% in 3/3						std erro puromycin	8.34203	1.62629	7.32066
									Rluc
	ctrl3 F-1	ctrl3 F-2	ctrl3 F-3						1	6.21211	2.5763				9.78841		10.2162	63.4639	26.3199						T-Test	0.942051	0.832827	0.795827
			21.5368						GAPDH														100
	21.0886	21.9617	21.3743					raw	1	0.529611	0.769851				2.29946		43.4884	23.0319	33.4796							0.471026	0.416414	0.397913
	20.9954	21.9563	21.347					norm.	1	0.0852545	0.29882				1.38407		72.2504	6.15968	21.5899				100
Mean	21.042	21.959	21.4193																				100
∆ CT	0	0.916996	0.37735
fold change	1	0.529611	0.769851					puromycin 1	1	2	3				Total		% in 1/3	% in 2/3	% in 3/3
									Rluc
									1	2.11858	0.968761				4.08734		24.4658	51.8327	23.7015				100
									GAPDH
								raw	1	1.19668	1.04385				3.24053		30.8592	36.9286	32.2122				100
	CTs							norm.	1	0.564852	1.07751				2.64236		37.845	21.3768	40.7782				100
	puromycin 1 F-1	puromycin 1 F-2	puromycin 1 F-3
	21.4167	21.2134	20.9992					puromycin 2	1	2	3				Total		% in 1/3	% in 2/3	% in 3/3
	21.5414	21.2326	21.4186						Rluc
		21.2141	21.8336						1	0.494914	0.0467902				1.5417		64.8633	32.1017	3.03497				100
Mean	21.4791	21.22	21.4172						GAPDH
∆ CT	0	-0.259039	-0.0619094					raw	1	0.570844	0.0917748				1.66262		60.1461	34.334	5.51989				100
fold change	1	1.19668	1.04385					norm.	1	1.15342	1.96141				4.11483		24.3023	28.0308	47.6669				100
	puromycin 2 CxB-1	puromycin 2 CxB-2	puromycin 2 CxB-3					puromycin 3	1	2	3				Total		% in 1/3	% in 2/3	% in 3/3
	20.1632		23.6418						Rluc
	20.3808	21.1184	23.8747						1	2.68177	1.0047				4.68647		21.338	57.2236	21.4384				100
	20.3581	21.1006	23.7228						GAPDH
Mean	20.3007	21.1095	23.7464					raw	1	0.953527	0.34582				2.29935		43.4906	41.4695	15.0399				100
∆ CT	0	0.808833	3.44576					norm.	1	0.355559	0.344202				1.69976		58.8318	20.9182	20.25				100
fold change	1	0.570844	0.0917748
								puromycin 4	1	2	3				Total		% in 1/3	% in 2/3	% in 3/3
	puromycin 3 F-1	puromycin 3 F-2	puromycin 3 F-3						Rluc
	21.2904	21.5865	22.887						1	0.894009	0.289038				2.18305		45.8075	40.9524	13.2401				100
	21.301	21.3302	23.1785						GAPDH
		21.1764	22.4174					raw	1	0.366253	0.0923855				1.45864		68.5571	25.1093	6.33368				100
Mean	21.2957	21.3644	22.8276					norm.	1	0.409675	0.319631				1.72931		57.8267	23.6901	18.4832				100
∆ CT	0	0.0686541	1.53191
fold change	1	0.953527	0.34582
	puromycin 4 F-1	puromycin 4 F-2	puromycin 4 F-3
	19.6532	21.1418	23.0901
	19.5455	21.405	23.1172
	19.8036	20.8028
Mean	19.6675	21.1165	23.1036
∆ CT	0	1.44909	3.43619
fold change	1	0.366253	0.0923855
Rluc	CTs
	ctrl1 F-1	ctrl1 F-2	ctrl1 F-3
	21.3485	20.2696	22.684
	21.4428	20.2196	22.6251
	21.2591	20.2286	22.742
Mean	21.3501	20.2392	22.6837
∆ CT	0	-1.11086	1.33361
fold change	1	2.15974	0.396773
	ctrl2 F-1	ctrl2 F-2	ctrl2 F-3
	21.897	22.5543	23.5882
	22.0052	22.4568	23.7356
	21.9754	22.5009	23.5065
Mean	21.9592	22.504	23.6101
∆ CT	0	0.544788	1.65093
fold change	1	0.685492	0.318435
	ctrl3 F-1	ctrl3 F-2	ctrl3 F-3
	24.568	22.0893	23.2483
	24.7426	22.1052	23.2828
	24.6802	21.891	23.3638
Mean	24.6636	22.0285	23.2983
∆ CT	0	-2.63508	-1.3653
fold change	1	6.21211	2.5763
	CTs
	puromycin 1 F-1	puromycin 1 F-2	puromycin 1 F-3
	22.5545	21.3095	22.4588
	22.3982	21.2581	22.5834
	22.328	21.4637	22.3758
Mean	22.4269	21.3438	22.4727
∆ CT	0	-1.08309	0.0457878
fold change	1	2.11858	0.968761
	puromycin 2 CxB-1	puromycin 2 CxB-2	puromycin 2 CxB-3
	20.7149	21.743	25.2184
	20.7057	21.771	25.1054
	20.7336	21.6843	25.0832
Mean	20.718	21.7328	25.1357
∆ CT	0	1.01475	4.41765
fold change	1	0.494914	0.0467902
	puromycin 3 F-1	puromycin 3 F-2	puromycin 3 F-3
	22.8133	21.3511	22.8544
	22.7861	21.3313	22.8366
	22.7937	21.4411	22.6818
Mean	22.7977	21.3745	22.7909
∆ CT	0	-1.42318	-0.00676854
fold change	1	2.68177	1.0047
	puromycin 4 F-1	puromycin 4 F-2	puromycin 4 F-3
	21.0461		23.0945
	21.3602	21.491	23.098
	21.5106	21.4435
Mean	21.3056	21.4673	23.0963
∆ CT	0	0.161638	1.79067
fold change	1	0.894009	0.289038
